# Supplementary material for: Rapid Detection of DNA and RNA Shrimp Viruses Using CRISPR-Based Diagnostics
Source: PubMed Central journal article supplement (PMC10304985; doi:10.1128/aem.02151-22), 2023-05-23
Supplement: aem.02151-22-s0001.pdf [file aem.02151-22-s0001.pdf]

**Supplemental material for**

**Rapid detection of DNA and RNA shrimp viruses using CRISPR-based diagnostics**

Samuel R. Major<sup>a</sup>, Matthew J. Harke<sup>a</sup>, Roberto Cruz-Flores<sup>b\*</sup>, Arun K. Dhar<sup>b</sup>, Andrea G. Bodnar<sup>a</sup>, and Shelly A. Wanamaker<sup>a#</sup>

<sup>a</sup>Gloucester Marine Genomics Institute, Gloucester, MA, United States.

<sup>b</sup>Aquaculture Pathology Laboratory, School of Animal and Comparative Biomedical Sciences, The University of Arizona, Tucson, AZ, United States.

<sup>#</sup>Please address manuscript correspondence to Shelly A. Wanamaker

([shelly.wanamaker@gmgi.org](mailto:shelly.wanamaker@gmgi.org)).

<sup>\*</sup>Present address: Centro de Investigación Científica y de Educación Superior de Ensenada, (CICESE), Carretera Ensenada-Tijuana No. 3918, Zona Playitas, 22860 Ensenada, Baja California, Mexico.

## **Table of contents**

**Supplemental Protocol.** One-pot SHERLOCK protocol for WSSV and TSV detection

### **Supplemental Figures**

Figure S1. Effects of WSSV LAMP primer modifications

Figure S2. Target regions of guide RNAs screened for TSV and WSSV assays

Figure S3. Optimizing amount of non-target and target DNA for the TSV SHERLOCK assay

Figure S4. Comparison of synthetic and genomic target dilution series

Figure S5. Non-specific LAMP does not give rise to Cas cleavage

### **Supplemental Tables**

Table S1. Consensus genome, gBlock oligos, primers, sgRNA, and reporter oligo sequences used for developing TSV and WSSV assays

Table S2. Composition of LAMP primer evaluation reactions, Cas sgRNA evaluation reactions, and one-pot SHERLOCK reactions, template dilutions, and 10x primer mix

Table S3. Viral concentrations estimated by qPCR, SHERLOCKv1, and SHERLOCKv2 assays

## Supplemental Protocol. One-pot SHERLOCK protocol for WSSV and TSV detection

### Materials

- Nuclease free water
- 10X Isothermal Amplification Buffer (New England BioLabs, Cat# B0537S)
- 100 mM MgSO<sub>4</sub> (New England BioLabs, Cat# B1003S, supplied with M0538L)
- 10 mM dNTPs (New England BioLabs, Cat# N0447L)
- Bst 2.0 WarmStart DNA Polymerase (New England BioLabs, Cat# M0538L)
- WarmStart RTx Reverse Transcriptase (New England BioLabs, Cat# M0380L)
- 500 mM Taurine (Millipore Sigma, Cat# 86329)
- 2 M Glycine (ThermoFisher, Cat# BP381-500)
- *Aap* Cas12b enzyme (synthesized by GenScript)
- 5'FAM/TTTTT/3'IBFQ reporter (100 μM, Integrated DNA Technologies)
- SYTO-82 Fluorescent Stain (ThermoFisher, Cat# S11363)
- Sample DNA or RNA
- 10 μM Guide RNA
  - Guide RNA can be prepared ahead of time and stored at -80°C before use.
  - Prepare guide RNA as follows:
    1. Amplify guide RNA template using the following oligos and conditions:
      - *Aap Cas12b sgRNA scaffold gBlock* 5'-  
TGTA AACGACGGCCAGTcatataTAATACGACTCACTATAG  
GGGTCTAGAGGACAGAATTTTTCAACGGGTGTGCCAATG  
GCCACTTCCAGGTGGCAAAGCCCGTTGAGCTTCTCAA  
TCTGAGAAGTGGCAC GTCATAGCTGTTTCCTG-3'
      - Cas12b\_sgRNA\_fwd primer 5'-  
CATATATAATACGACTCACTATAGGGGTCTAGAGG-3'
      - Cas12b\_sgRNA\_rev primer(s): Replace x's with 20 base target region 5'-  
xxxxxxxxxxxxxxxxxxxxGTGCCACTTCTCAGATTTGAGAAGC  
TC-3'
      - 1X HF Buffer (New England BioLabs), 200 μM dNTPs, 0.5 μM forward primer, 0.5 μM reverse primer, 0.01 ng gBlock DNA, and 1 unit Phusion DNA polymerase (New England BioLabs) in 50 μL.
      - Run reaction on a thermocycler (Applied Biosystems) with the following parameters: 98°C for 2 minutes, 30 cycles of 98°C for 10 seconds, 58°C for 30 seconds, and 72°C for 15 seconds, 72°C for 5 minutes, and a hold at 10°C.
    2. Gel purify PCR products on a 2% agarose 1x TAE gel and using the QIAquick Gel Extraction kit (Qiagen) following manufacturer's instructions.
    3. Transcribe guide RNA using the Ampliscribe T7 flash transcription kit (Lucigen)
      - In a 40 μL reaction, combine 50 ng of gel purified PCR product, 9 mM of each ribonucleotide, 9 mM of DTT, 1 μL of RiboGuard

RNase inhibitor, 4  $\mu\text{L}$  of T7 RNA polymerase, and 1X transcription reaction buffer.

- Run reactions at 42°C for 4 hours
- Incubate with 2  $\mu\text{L}$  of DNase I (Lucigen) at 37°C for 15 minutes
- Purify using the RNA Clean and Concentrate Kit (Zymo Research) following manufacturer's instructions
- Store purified guide RNA at -80°C.

- 10X LAMP Primer Mix

- 10X Primer mix can be prepared ahead of time and stored at -20°C before use.
- Prepare a 10x primer mix of the LAMP primers as follows:

| <b>10X Primer Mix</b>                      |                                               |                                                    |                                    |
|--------------------------------------------|-----------------------------------------------|----------------------------------------------------|------------------------------------|
| <b>LAMP Primer</b><br>(100 $\mu\text{M}$ ) | <b>10x concentration</b><br>( $\mu\text{M}$ ) | <b>Reaction Concentration</b><br>( $\mu\text{M}$ ) | <b>Volume</b><br>( $\mu\text{L}$ ) |
| F3                                         | 2                                             | 0.2                                                | 2                                  |
| B3                                         | 2                                             | 0.2                                                | 2                                  |
| BIP                                        | 16                                            | 1.6                                                | 16                                 |
| FIP                                        | 16                                            | 1.6                                                | 16                                 |
| LF*                                        | 4                                             | 0.4                                                | 4                                  |
| LB*                                        | 4                                             | 0.4                                                | 4                                  |
| ddH <sub>2</sub> O                         |                                               |                                                    | 56                                 |
| Total                                      |                                               |                                                    | 100                                |

\* If not included in LAMP primer set, replace with water

### Procedure

1. Prepare sample DNA or RNA

- For synthetic target, dilutions are made as follows:
  - For TSV, combine RNA stock containing 10<sup>10</sup> copies TSV target, nuclease free water, and specific pathogen free shrimp genomic RNA (5 ng per 20  $\mu\text{L}$  one-pot reaction)
  - For WSSV, combine DNA stock containing 10<sup>9</sup> copies WSSV target, nuclease free water, and specific pathogen free shrimp genomic DNA (20 ng per 20  $\mu\text{L}$  one-pot reaction)
- For genomic DNA or RNA extracted from shrimp, dilutions are made as follows:

| <b>Template dilution component</b>                            | <b>WSSV</b>                  | <b>TSV</b>                  |
|---------------------------------------------------------------|------------------------------|-----------------------------|
| Sample DNA/RNA                                                | 0.25 ng/ $\mu\text{L}$ (1ng) | 2 ng/ $\mu\text{L}$ (10 ng) |
| Pathogen free shrimp nucleic acid (DNA for WSSV, RNA for TSV) | 5 ng/ $\mu\text{L}$ (20 ng)  | 1 ng/ $\mu\text{L}$ (5 ng)  |
| Nuclease free water                                           | variable                     | variable                    |
| Total volume/one-pot reaction                                 | 4 $\mu\text{L}$              | 5 $\mu\text{L}$             |

2. Prepare the master mix by combining the reagents in the following order:

| <b>One-Pot SHERLOCK<br/>Reaction component</b>                                                   | <b>Initial<br/>concentration</b> | <b>Final concentration</b>         | <b>WSSV<br/>reaction<br/>volume<br/>(<math>\mu</math>L)</b> | <b>TSV<br/>reaction<br/>volume<br/>(<math>\mu</math>L)</b> |
|--------------------------------------------------------------------------------------------------|----------------------------------|------------------------------------|-------------------------------------------------------------|------------------------------------------------------------|
| water                                                                                            |                                  |                                    | 3.44                                                        | 1.46                                                       |
| Isothermal Amp Buffer                                                                            | 10x                              | 1x                                 | 2                                                           | 2                                                          |
| MgSO <sub>4</sub>                                                                                | 100 mM                           | 8 mM                               | 1.6                                                         | 1.6                                                        |
| glycine                                                                                          | 2 M                              | 200 mM                             | 2                                                           |                                                            |
| taurine                                                                                          | 500 mM                           | 50 mM                              |                                                             | 2                                                          |
| Cas12b                                                                                           | 8.73 $\mu$ M                     | 200 nM (150 nM for<br>TSV)         | 0.458                                                       | 0.344                                                      |
| sgRNA                                                                                            | 10 $\mu$ M                       | 200 nM (600 nM for<br>TSV)         | 0.4                                                         | 1.2                                                        |
| dNTPs                                                                                            | 10 mM                            | 1.4 mM                             | 2.8                                                         | 2.8                                                        |
| <i>incubate at room temperature for 15 minutes to facilitate formation of CRISPR-Cas complex</i> |                                  |                                    |                                                             |                                                            |
| WarmStart RTx<br>Reverse Transcriptase                                                           | 15000 units/mL                   | 150 units/mL                       |                                                             | 0.2                                                        |
| WarmStart Bst 2.0                                                                                | 8000 units/mL                    | 320 units/mL                       | 0.8                                                         | 0.8                                                        |
| Primer mix                                                                                       | 10x                              | 1x                                 | 2                                                           | 2                                                          |
| SYTO-82 LAMP dye                                                                                 | 100 $\mu$ M                      | 0.5 $\mu$ M (1 $\mu$ M for<br>TSV) | 0.1                                                         | 0.2                                                        |
| 5'FAM/TTTTT/3'IBFQ<br>reporter                                                                   | 100 $\mu$ M                      | 2 $\mu$ M                          | 0.4                                                         | 0.4                                                        |
| Sample DNA/RNA                                                                                   |                                  |                                    | 4                                                           | 5                                                          |
| Total                                                                                            |                                  |                                    | 20                                                          | 20                                                         |

3. Run on real-time PCR thermocycler at 62°C for WSSV or 60°C for TSV for 1 hour taking a reading every 2 minutes.

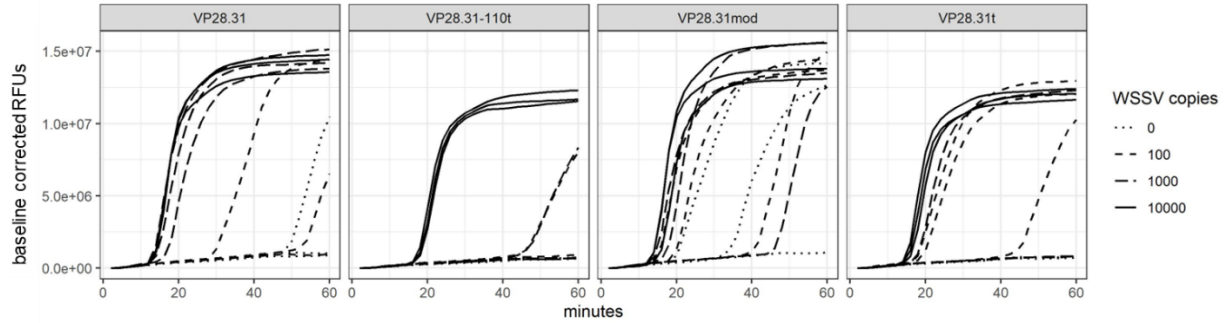

**Figure S1.** Amplification plots of triplicate LAMP reactions showing the effects of different modifications (indicated by plot titles and shown in **Table S1**) to the VP28.31 primer set for WSSV.

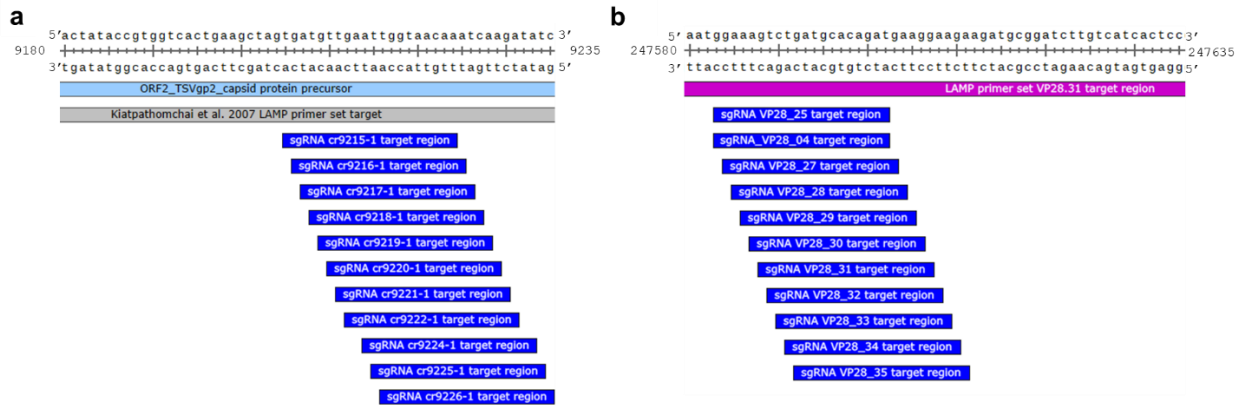

**Figure S2.** Diagrams of annotated consensus genome segments showing target regions of guide RNAs (dark blue) screened for **(a)** TSV or **(b)** WSSV.

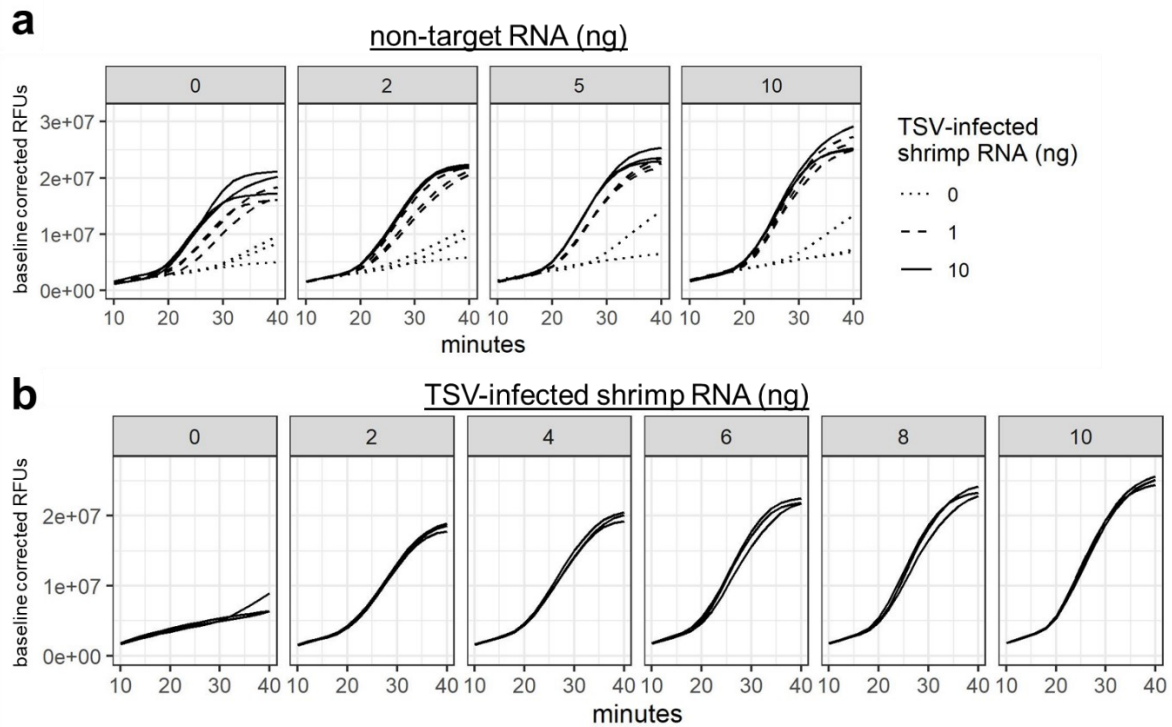

**Figure S3.** Optimizing amount of non-target and target RNA for the TSV SHERLOCK assay. **(a)** Cas cleavage activity plots of TSV SHERLOCK reactions containing varying amounts (ng; nanograms) of non-target RNA and varying amounts of target RNA (TSV-infected shrimp genomic RNA). **(b)** Cas cleavage activity plots of TSV SHERLOCK reactions containing varying amounts (ng; nanograms) of TSV-infected shrimp genomic RNA (gRNA).

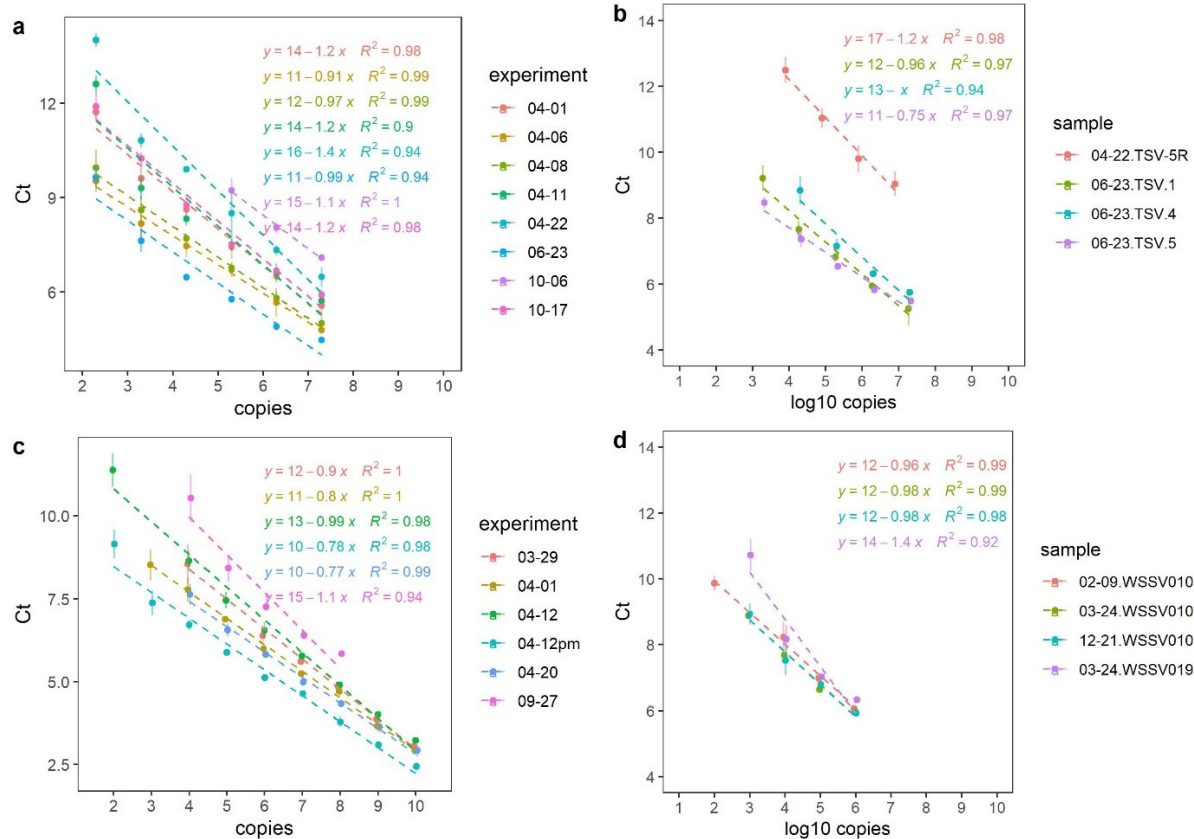

**FigureS4.** Comparison of synthetic and genomic target dilution series. **(a)** TSV SHERLOCK standard curves generated with synthetic target for eight different experiments. **(b)** TSV SHERLOCK curves generated with a 10-fold dilution series of genomic target isolated from samples with high viral load. **(c)** WSSV SHERLOCK standard curves generated with synthetic target for six different experiments. **(d)** WSSV SHERLOCK curves generated with a 10-fold dilution series of genomic target isolated from samples with high viral load. Linear equations are shown for each regression model (dashed line) with color corresponding to experiment number.



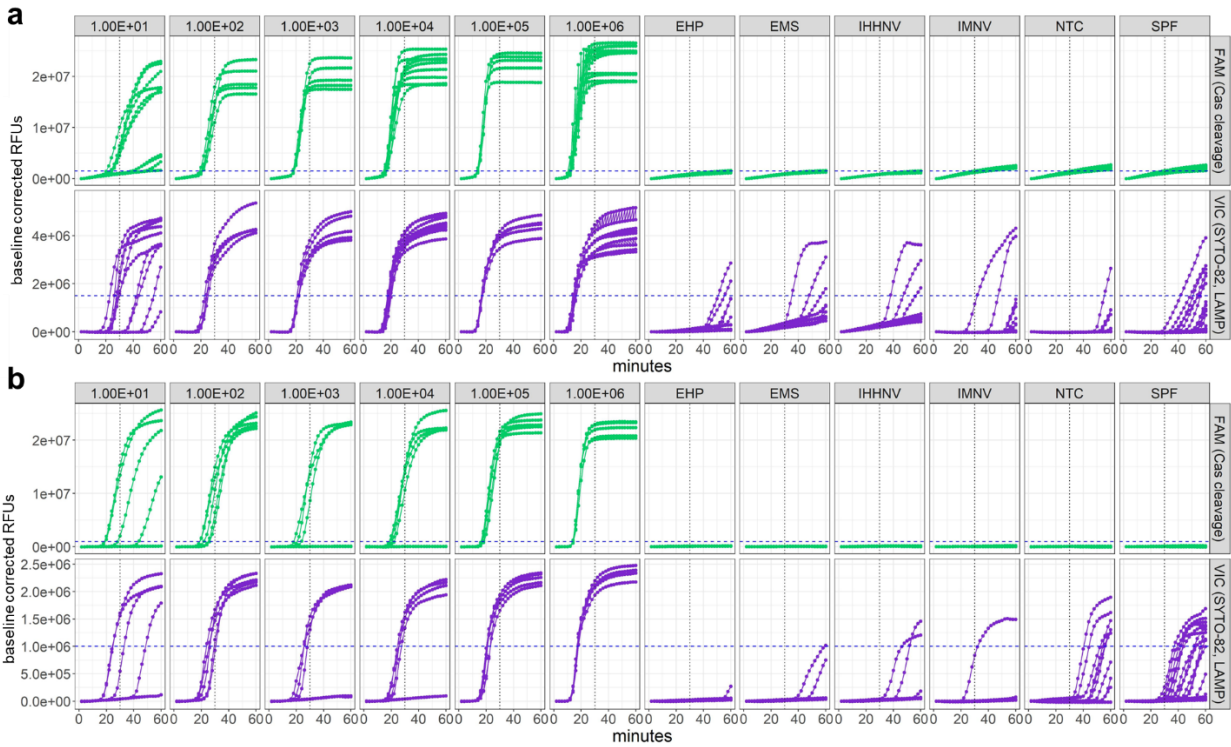

**Figure S5.** Non-specific LAMP signal does not give rise to Cas cleavage signal. (a) TSV and (b) WSSV SHERLOCKv2 assay fluorescence shows only samples containing target sequence produce a Cas cleavage signal (green) above the CT (blue dashed line), and non-specific LAMP signal (purple) produced in samples without target does not lead to Cas cleavage. Plots titled 1e+01 through 1e+06 indicate viral copies present in each reaction; ‘NTC’ signifies no template control; SPF signifies specific-pathogen free shrimp samples; EHP, EMS, IHNV, and IMNV signify sample infected with nontarget viruses.

**Table S1.** Consensus genome, gBlock oligos, primers, sgRNA, and reporter oligo sequences used for developing TSV and WSSV assays. Bold indicates oligos used in final versions of assays.

| Virus | Oligo type         | Name            | LAMP Primer Mix Name | Notes          | Sequence (5'-3')                                         |
|-------|--------------------|-----------------|----------------------|----------------|----------------------------------------------------------|
| TSV   | <b>LAMP Primer</b> | <b>TSV_F3</b>   | <b>TSV</b>           |                | <b>CAATTGAAATTCTGAGATTAGATC</b>                          |
| TSV   | <b>LAMP Primer</b> | <b>TSV_FIP</b>  | <b>TSV</b>           |                | <b>CTAGCTTCAGTGACCACGGTATAGTTTTATTTTGTAGTCCAAAGCTCCA</b> |
| TSV   | <b>LAMP Primer</b> | <b>TSV_LF</b>   | <b>TSV</b>           |                | <b>TACCTGGAGTAAATTTAC</b>                                |
| TSV   | <b>LAMP Primer</b> | <b>TSV_B3</b>   | <b>TSV</b>           |                | <b>GGTACATATCGAGCCACTC</b>                               |
| TSV   | <b>LAMP Primer</b> | <b>TSV_BIP</b>  | <b>TSV</b>           |                | <b>GCGAACCCATGCGGGTATAGTTTTCAATGCGACCAATGACTG</b>        |
| TSV   | <b>LAMP Primer</b> | <b>TSV_LB</b>   | <b>TSV</b>           |                | <b>ATGAAGAACCGCCAGTTAAGCAA</b>                           |
| TSV   | LAMP Primer        | TSV_P123L7_F3   | TSV_P123L7           |                | GTCCAGCTTTCACTTTTGG                                      |
| TSV   | LAMP Primer        | TSV_P123L7_FIP  | TSV_P123L7           |                | ACAAATTCATGGCACCTCAACCCCTGCCGAATTGGCTTAA                 |
| TSV   | LAMP Primer        | TSV_P123L7_LF   | TSV_P123L7           |                | TGACGGGTCTACACCTGAAGG                                    |
| TSV   | LAMP Primer        | TSV_P123L7_BIP  | TSV_P123L7           |                | TGGTGCATTTATCTCAACAGTTTTCTCTCAGAGTAAAAACCTG              |
| TSV   | LAMP Primer        | TSV_P123L7_B3   | TSV_P123L7           |                | CTCTAATAGACCTTAGTGAGCA                                   |
| TSV   | LAMP Primer        | TSV_P73L39_F3   | TSV_P73L39           |                | TTCCAAGTCTTCCCTCAA                                       |
| TSV   | LAMP Primer        | TSV_P73L39_FIP  | TSV_P73L39           |                | ATCACCAGCACTTGAAGCAATCAATTAGTAATTTGGAAAGGACG             |
| TSV   | LAMP Primer        | TSV_P73L39_LB   | TSV_P73L39           |                | TCACTTTTGGACCTGCCGA                                      |
| TSV   | LAMP Primer        | TSV_P73L39_BIP  | TSV_P73L39           |                | GACCACACTTTCTCTCAATTGGCCTGAAGGGTGTTAAATTAA GCC           |
| TSV   | LAMP Primer        | TSV_P73L39_B3   | TSV_P73L39           |                | ACAATGACGGGTCTACAC                                       |
| TSV   | LAMP Primer        | TSV_P215L25_F3  | TSV_P215L25          |                | GTTGAACAACAGTGATCCAT                                     |
| TSV   | LAMP Primer        | TSV_P215L25_FIP | TSV_P215L25          |                | TTGAGGTTGCAAAAACAAAAGATGGGTACATATGTCCAGTGT CAGG          |
| TSV   | LAMP Primer        | TSV_P215L25_LB  | TSV_P215L25          |                | GATGCATTGACGCGGCTTTAG                                    |
| TSV   | LAMP Primer        | TSV_P215L25_BIP | TSV_P215L25          |                | GCACGTATGTCCCCAAGTCTACTTTAACATCTACATAAACGC ATAG          |
| TSV   | LAMP Primer        | TSV_P215L25_B3  | TSV_P215L25          |                | CGATGCGTGCAAACCTCAT                                      |
| WSSV  | LAMP Primer        | VP28_F3         | VP28                 | initial design | CTCCGATTCTGTGACTG                                        |
| WSSV  | LAMP Primer        | VP28_B3         | VP28                 | initial design | CCACACCTTGAATGTTCCCT                                     |
| WSSV  | LAMP Primer        | VP28_FIP        | VP28                 | initial design | GCCCAAGGTGTCGCTGTCAAACCTGAGGTTGGATCAGGCTAC               |
| WSSV  | LAMP Primer        | VP28_BIP        | VP28                 | initial design | CTTGTCATCACTCCCGTGGAGGAAGGTGAGATTCTGCCCA                 |
| WSSV  | LAMP Primer        | VP28_LF         | VP28                 | initial design | GGACACATCAGTCATCTTG                                      |
| WSSV  | LAMP Primer        | VP28_LB         | VP28                 | initial design | GCCGAGCACTCGAAGTG                                        |
| WSSV  | LAMP Primer        | VP28.1_F3       | VP28.1               | initial design | GGTTGGATCAGGCTACT                                        |

|             |                                     |                             |                |                                                                                                                                  |                                                                                                                                                                    |
|-------------|-------------------------------------|-----------------------------|----------------|----------------------------------------------------------------------------------------------------------------------------------|--------------------------------------------------------------------------------------------------------------------------------------------------------------------|
| WSSV        | LAMP Primer                         | VP28.1_B3                   | VP28.1         | initial design                                                                                                                   | CCAGTGATGTTGATCTTTCTTGATG                                                                                                                                          |
| WSSV        | LAMP Primer                         | VP28.1_FIP                  | VP28.1         | initial design                                                                                                                   | CCATTGCGGATCTTGATTTTGTCAAGATGACTGATGTGTC                                                                                                                           |
| WSSV        | LAMP Primer                         | VP28.1_BIP                  | VP28.1         | initial design                                                                                                                   | GCCGAGCACTCGAAGTCACACCTTGAATGTTCCCTCA                                                                                                                              |
| WSSV        | LAMP Primer                         | VP28.1_LF                   | VP28.1         | initial design                                                                                                                   | GGTGTGCTGTCAAAG                                                                                                                                                    |
| WSSV        | LAMP Primer                         | VP28.1_LB                   | VP28.1         | initial design                                                                                                                   | GTGGGGCAGAATCTCA                                                                                                                                                   |
| <b>WSSV</b> | <b>LAMP Primer</b>                  | <b>VP28.31_F3</b>           | <b>VP28.31</b> | <b>initial design</b>                                                                                                            | <b>AGGCTACTTCAAGATGAC</b>                                                                                                                                          |
| <b>WSSV</b> | <b>LAMP Primer</b>                  | <b>VP28.1_B3</b>            | <b>VP28.31</b> | <b>initial design</b>                                                                                                            | <b>CCAGTGATGTTGATCTTTCTTGATG</b>                                                                                                                                   |
| WSSV        | LAMP Primer                         | VP28.31_FIP                 | VP28.31        | initial design                                                                                                                   | CAGACTTCCATTGCGGATTGATGTGTCTTTGACAG                                                                                                                                |
| WSSV        | LAMP Primer                         | VP28.1_BIP                  | VP28.31        | initial design                                                                                                                   | GCCGAGCACTCGAAGTCACACCTTGAATGTTCCCTCA                                                                                                                              |
| <b>WSSV</b> | <b>LAMP Primer</b>                  | <b>VP28.31_LF</b>           | <b>VP28.31</b> | <b>initial design</b>                                                                                                            | <b>ATTTGCCCAAGGTGTCG</b>                                                                                                                                           |
| <b>WSSV</b> | <b>LAMP Primer</b>                  | <b>VP28.1_LB</b>            | <b>VP28.31</b> | <b>initial design</b>                                                                                                            | <b>GTGGGGCAGAATCTCA</b>                                                                                                                                            |
| WSSV        | LAMP Primer                         | VP28.1_F3                   | VP28.110       | initial design                                                                                                                   | GGTTGGATCAGGCTACT                                                                                                                                                  |
| WSSV        | LAMP Primer                         | VP28.1_B3                   | VP28.110       | initial design                                                                                                                   | CCAGTGATGTTGATCTTTCTTGATG                                                                                                                                          |
| WSSV        | LAMP Primer                         | VP28.110_FIP                | VP28.110       | initial design                                                                                                                   | GACTTCCATTGCGGATCTTGACTGATGTGTCTTTGAC                                                                                                                              |
| WSSV        | LAMP Primer                         | VP28.110_BIP                | VP28.110       | initial design                                                                                                                   | AGGGCCGAGCACTCGAACACACCTTGAATGTTCCCTC                                                                                                                              |
| WSSV        | LAMP Primer                         | VP28.110_LF                 | VP28.110       | initial design                                                                                                                   | TGCCAAGGTGTCGCT                                                                                                                                                    |
| WSSV        | LAMP Primer                         | VP28.110_LB                 | VP28.110       | initial design                                                                                                                   | GTGACTGTGGGGCAGA                                                                                                                                                   |
| <b>WSSV</b> | <b>LAMP Primer</b>                  | <b>VP28.31t_FIP</b>         | <b>VP28.31</b> | <b>optimization</b>                                                                                                              | <b>CAGACTTCCATTGCGGATTTTTGATGTGTCTTTGACAG</b>                                                                                                                      |
| <b>WSSV</b> | <b>LAMP Primer</b>                  | <b>VP28.1t_BIP</b>          | <b>VP28.31</b> | <b>optimization</b>                                                                                                              | <b>GCCGAGCACTCGAAGTTTTTACACCTTGAATGTTCCCTCA</b>                                                                                                                    |
| WSSV        | LAMP Primer                         | VP28_110_BIPt               | VP28.110       | optimization                                                                                                                     | AGGGCCGAGCACTCGAATTTTACACCTTGAATGTTCCCTC                                                                                                                           |
| WSSV        | LAMP Primer                         | VP28_31mod_FIP              | VP28.31        | optimization                                                                                                                     | GCATCAGACTTCCATTGCGGGTGTCTTTGACAGCG                                                                                                                                |
| WSSV        | LAMP Primer                         | VP28_F3                     | VP28_VP2 8.1   | initial design                                                                                                                   | CTCCGATTCTGTGACTG                                                                                                                                                  |
| WSSV        | LAMP Primer                         | VP28_FIP                    | VP28_VP2 8.1   | initial design                                                                                                                   | GCCCAAGGTGTCGCTGTCAAAGTGGATCAGGCTAC                                                                                                                                |
| WSSV        | LAMP Primer                         | VP28_LF                     | VP28_VP2 8.1   | initial design                                                                                                                   | GGACACATCAGTCATCTTG                                                                                                                                                |
| WSSV        | LAMP Primer                         | VP28.1_B3                   | VP28_VP2 8.1   | initial design                                                                                                                   | CCAGTGATGTTGATCTTTCTTGATG                                                                                                                                          |
| WSSV        | LAMP Primer                         | VP28.1_BIP                  | VP28_VP2 8.1   | initial design                                                                                                                   | GCCGAGCACTCGAAGTCACACCTTGAATGTTCCCTCA                                                                                                                              |
| WSSV        | LAMP Primer                         | VP28.1_LB                   | VP28_VP2 8.1   | initial design                                                                                                                   | GTGGGGCAGAATCTCA                                                                                                                                                   |
| <b>NA</b>   | <b>Cas12b sgRNA scaffold gBlock</b> | <b>Cas12b_m13-T7-Handle</b> | <b>NA</b>      | <b>Cas12b conserved handle with T7 promoter and m13 fwd (5' TGT AAA ACG ACG GCC AGT) and m13 rev (5' CAG GAA ACA GCT ATG AC)</b> | <b>TGTAAAACGACGGCCAGTcatataTAATACGACTCACTATAG GGGTCTAGAGGACAGAAATTTTCAACGGGTGTGCCAATGG CCACTTCCAGGTGGCAAAGCCCGTTGAGCTTCTCAAATCT GAGAAGTGGCAC GTCATAGCTGTTCTCTG</b> |

|             |                             |                                  |           |  |                                                       |
|-------------|-----------------------------|----------------------------------|-----------|--|-------------------------------------------------------|
| NA          | <b>gRNA template primer</b> | <b>Cas12b_sgRNA_fwd</b>          | NA        |  | <b>CATATATAATACGACTCACTATAGGGGCTAGAGG</b>             |
| TSV         | gRNA template primer        | TSV_cr9215-1                     | NA        |  | ttgttaccattcaacatcaGTGCCACTTCTCAGATTGAGAAGCTC         |
| TSV         | gRNA template primer        | TSV_cr9216-1                     | NA        |  | ttgttaccattcaacatcaGTGCCACTTCTCAGATTGAGAAGCTC         |
| TSV         | gRNA template primer        | TSV_cr9217-1                     | NA        |  | attgttaccattcaacatcaGTGCCACTTCTCAGATTGAGAAGCTC        |
| TSV         | gRNA template primer        | TSV_cr9218-1                     | NA        |  | gattgttaccattcaacaGTGCCACTTCTCAGATTGAGAAGCTC          |
| TSV         | gRNA template primer        | TSV_cr9219-1                     | NA        |  | tgattgttaccattcaacGTGCCACTTCTCAGATTGAGAAGCTC          |
| TSV         | gRNA template primer        | TSV_cr9220-1                     | NA        |  | ttgattgttaccattcaaGTGCCACTTCTCAGATTGAGAAGCTC          |
| TSV         | gRNA template primer        | TSV_cr9221-1                     | NA        |  | cttgattgttaccattcaGTGCCACTTCTCAGATTGAGAAGCTC          |
| TSV         | gRNA template primer        | TSV_cr9222-1                     | NA        |  | tcttgattgttaccattcaGTGCCACTTCTCAGATTGAGAAGCTC         |
| TSV         | gRNA template primer        | TSV_cr9224-1                     | NA        |  | tatcttgattgttaccatGTGCCACTTCTCAGATTGAGAAGCTC          |
| <b>TSV</b>  | <b>gRNA template primer</b> | <b>TSV_cr9225-1</b>              | <b>NA</b> |  | <b>atatcttgattgttaccaaGTGCCACTTCTCAGATTGAGAAGCTC</b>  |
| TSV         | gRNA template primer        | TSV_cr9226-1                     | NA        |  | gatattcttgattgttaccGTGCCACTTCTCAGATTGAGAAGCTC         |
| WSSV        | gRNA template primer        | Cas12b_sgRNA_rev_VP 28_25        | NA        |  | ATCTGTGCATCAGACTTCCGTGCCACTTCTCAGATTGAGAAGCTC         |
| <b>WSSV</b> | <b>gRNA template primer</b> | <b>Cas12b_sgRNA_rev_V P28_27</b> | <b>NA</b> |  | <b>CATCTGTGCATCAGACTTCCGTGCCACTTCTCAGATTGAGAAGCTC</b> |
| WSSV        | gRNA template primer        | Cas12b_sgRNA_rev_VP 28_28        | NA        |  | TCATCTGTGCATCAGACTTGTGCCACTTCTCAGATTGAGAAGCTC         |
| WSSV        | gRNA template primer        | Cas12b_sgRNA_rev_VP 28_29        | NA        |  | TTATCTGTGCATCAGACTTGTGCCACTTCTCAGATTGAGAAGCTC         |

|      |                      |                           |    |                                |                                                                                                                                                                                                                                                                                                                                                                                                                                          |
|------|----------------------|---------------------------|----|--------------------------------|------------------------------------------------------------------------------------------------------------------------------------------------------------------------------------------------------------------------------------------------------------------------------------------------------------------------------------------------------------------------------------------------------------------------------------------|
| WSSV | gRNA template primer | Cas12b_sgRNA_rev_VP 28_30 | NA |                                | CTTCATCTGTGCATCAGACTGTGCCACTTCTCAGATTTGAGA AGCTC                                                                                                                                                                                                                                                                                                                                                                                         |
| WSSV | gRNA template primer | Cas12b_sgRNA_rev_VP 28_31 | NA |                                | CCTTCATCTGTGCATCAGACGTGCCACTTCTCAGATTTGAGA AGCTC                                                                                                                                                                                                                                                                                                                                                                                         |
| WSSV | gRNA template primer | Cas12b_sgRNA_rev_VP 28_32 | NA |                                | TCCTTCATCTGTGCATCAGAGTGCCACTTCTCAGATTTGAGA AGCTC                                                                                                                                                                                                                                                                                                                                                                                         |
| WSSV | gRNA template primer | Cas12b_sgRNA_rev_VP 28_33 | NA |                                | TTCTTCATCTGTGCATCAGGTGCCACTTCTCAGATTTGAGA AGCTC                                                                                                                                                                                                                                                                                                                                                                                          |
| WSSV | gRNA template primer | Cas12b_sgRNA_rev_VP 28_34 | NA |                                | CTTCCTTCATCTGTGCATCAGTGCCACTTCTCAGATTTGAGAA GCTC                                                                                                                                                                                                                                                                                                                                                                                         |
| WSSV | gRNA template primer | Cas12b_sgRNA_rev_VP 28_35 | NA |                                | TCTTCCTTCATCTGTGCATCGTGCCACTTCTCAGATTTGAGAA GCTC                                                                                                                                                                                                                                                                                                                                                                                         |
| WSSV | gRNA template primer | Cas12b_sgRNA_rev_VP 28_04 | NA |                                | GGAAAGTCTGATGCACAGATGTGCCACTTCTCAGATTTGAG AAGCTC                                                                                                                                                                                                                                                                                                                                                                                         |
| TSV  | gBlock               | P215L25                   | NA |                                | CCTAGGTCTAGGGCGGCacaagggaccttagcatgacccttagatccagctacgatgcgtgcaaacctcttaacatcatataaacgcatagatctaaacgccgtctgaatgcatctgacactatgaatagactggggacatacgtgcctggaattacgtttgaggttgcacaaacaaagatgggtgctatgaatgtattgccttaccctgacactggacatagtacttgatggatcactgtgttcaacctaataaaattcaataactcaggCCCTATAGTGAGTCGTATTACTCTATTTTTATAGGTTAATGTCATGATGGTTTCTTAGACGTCGGAATTGCC TGT                                                                              |
| TSV  | gBlock               | TSV-9098-9375             | NA |                                | CCTAGGTCTAGGGCGGCagatcgcaagaatacgtctgataagcttattgggtacatcagaccactctacggcaaatcgaccaatgactgattgcttaactggcggttctcatctatacccgcatgggttcgcggttacgctcatttactgtgatcttgattgttaccattcaacatcactagctcagtgaccacggatagttacctggagtaaatcactggagcttggactcaaaatcgtacttaattcagaaattcaattgctctccacgaattGCCCTATAGTGAGTCGTATTACTCTATTTTTATAGGTTAATGTCATGATGGTTTCTTAGACGTCGG AATTGCCTGT                                                                         |
| TSV  | gBlock               | TSV-9807-10157            | NA |                                | CCTAGGTCTAGGGCGGCactaatgtcttaatagaccttagtgagcaggcatttatctctcagagtaaaaaccctgccgcgcaacgcggttagggaaaactgttgagataaatcaccatgaatgacaaattcggcactcaaccacgcgtcaaatgacgggtctacacctgaaggtgttaaatgaaccaattcggcaggtccaaaagtgaagctggacatcctgccaattgagagaaagtgtggtcatcaccagcactgcaagcacaagtaactcatttccgtcctttcaaaactaattgataaataccttaattgagggaaagactggaatcaataactaaattttctgctCCCTATAGTGAGTCGTATTACTCTATTTTTATAGGTTAATGTCATGATGTTTCTTAGACGTCGGAATTGCCTGT |
| WSSV | gBlock               | VP28_gBlock               | NA | synthetic target for WSSV VP28 | CTCCGATTCTGTGACTGCTGAGGTTGGATCAGGCTACTTC AAGATGACTGATGTGTCCTTTGACAGCGACACCTTGGGCAA AATCAAGATCCGCAATGGAAAGTCTGATGCACAGATGAAGG AAGAAGATCGGATCTTGTCATCACTCCCGTGGAGGGCCGA GCACTCGAAGTACTGTGGGCAGAAATCTACCTTTGAGGG AACATTCAAGGTGTGG                                                                                                                                                                                                           |

|      |               |                       |    |                                                                         |                                                     |
|------|---------------|-----------------------|----|-------------------------------------------------------------------------|-----------------------------------------------------|
| WSSV | gBlock primer | VP28-1_gBlock_B3      | NA | primer for amplifying WSSV VP28 synthetic target for VP28.31 primer set | CCAGTGATGTTGATCTTTCTTGATGTGTTGTTCCACACCTTGAATGTTCCC |
| NA   | reporter      | FAM_5bpDNA_Report er  | NA |                                                                         | /56-FAM/TTTTT /3IABkFQ/                             |
| NA   | reporter      | FAM_FluorDNA_Reporter | NA |                                                                         | /56-FAM/TTTTTTTTTTTTTTTTTTTT/3IABkFQ/               |
| NA   | reporter      | Fluor_DNA_Reporter    | NA |                                                                         | /5HEX/TTTTTTTTTTTTTTTTTTTT/3IABkFQ                  |

> TSV | consensus genome | tsv\_consensus\_20201004

TTTAAAAGTCGTGCGTGGCTTCACCACGCACGATCAGTACTATCAGTTAACCACTCTTGAATAT  
GCTCAATGACCCTATTCAACACTGGTGTCTCTTAGTACATTATTTTAGCACTTAACGTGCATGA  
GTTTTGCCCATTTCTTTCAAAAATGAGTATTCGAGGAGACGTCCCCTCCCGTCTTATTTCAA  
CCGTAGACTCGACATCTATTGGTGGACATTTAATTCCAGTCGCCGTAAGTTGCTTCTGCCCCGC  
GCTATATTTTCTTATACTTATGGTTCTATAGGTCTGGTTTAAAACGTAAATAGACGGCCACAA  
ACTATAGAACGCGTACCCGGAACGCCAATCCCGGATAAGTCCCTGGATATATAGATGCACCGCA  
ATATAAGCCTGCAGACTGGCTCATATACTATGGCCTCTTATTATCTAAACATTTAAACCACAA  
CCTCCGCAGAACCCTGTTGCCGACCGAGCCTTCTATGTGATGAACGATGATGGAGAAAACCGG  
ATATATTCGTTAATTGGAACCTTGGCAGCGGCCCTGCCTTTAAGGTTGGTTCACGACGCTACA  
AATCACACATTCCATACAGACGTGAAGCCACGTTTGCAGAATTGTGCAACCAGTTTCATGATAG  
AGTGTTACCGTTTGCTAACCCTCGGGTCTGGAAAGAAGTTATTTCCGAGAATAAAGTGCAGCCT  
GATTCAATGCTTAAGGCTGCATTTGACAACCTGGGAAGAATGGCCAAAGGCTAAAGTATGTGAAG  
AACTATACTCTGAGTGTGAATGTGGATATGTGGGCACCTGTTACGTGTCAGTCGATTGGTTGAG  
GCCTCAGGCAACGAAGTGAATGATTGCATTTTGAAGATGAATAGGAAAGTTGAATACCCATAT  
CACACTATAGGAGTTTCAGGAAATGTTGTTACTAATACAGATATTGTTTATACAGGATATGCAG  
ACGTCTTCAAGTGTGAACAGTGTGATTTGCTGATGGGTGCTTGGGCACCAAACGACATTCACG  
ACTGACGCACAATATTCGAGCATCACAGTGTGTCCAGTTTAAAGTCCCCACAGAAAATTTAGTG  
GCACGTAATTATGTGTTGTTGTGTGAGGAAATGAGCGAGAAAATATTCCTGTAATTTTCCAGG  
ATTATAGTGAAGGGAATGTCTTTACGTGTCCGATTGTTAGTGGAGATCTAACTGCTGTTGGTAC  
AGCATCCAATATGTATACAGCTCGAGATGTAGCGTCTAAAAATTTGTTAGATCAGCTACATAAC  
ACCCCAATGTGCACATGCACTCTCTGCATTCCTCCCGTATGAGAATTTCCCTTGTGAAGCTC  
TGGAATTTGCAGTTGAGCAAGGTATTATCCCCCTGTGACCTTTGATGAGGTATTTGCTAATGA  
TGAATACGTTATTACTATTTTCATGTAGCCTATTAGTTGTTGCTGACGTTGGCCCCACCCAAGCA  
GTTGCACGAGAAAGAGCTGCAAAGAGATTTTTGAAGATGTATGATTATCTGCAAGTTATCCTA  
GTACCCACATGTTTACTTTATCCACACTCCCCAGAGATCAGGTGAAACGCTAGAGTTGGCTAA  
TGCCACATTTGAACCATGTGAATAATGTGATTGACCGACACGATGAAGCAATAAGTAATGTCAGG  
CAAATGTTGAAGTGAAGTTGACGGATGTGTCCCGACAAGTTGGTGCTATGTTGCCGAAAGTAG  
AAACTGCTATTGACGACGTATCTTCTACTCTATCTTCCTTTAGGGGAGTATTAGATAAGATTTT

AGCATGGATGCCTTCATCAAACCCTAAGATAATTGACCTCATTAAGGAGACTTTTGTATCACTG  
TTTTTTGCTATTCTAACTAAGTCTTTGTATCCTATAAATTCAGGGTATATCTAGTTATGCTCTTC  
GTAACAATTTGATGGCTAACCATCTGACTGCCTTGTGAGAATGGTTAATGACACTCAAGTATGA  
TTCACCGGATGAAGAGGAGATGCCAAGTACACACGGTTTCATGGATGACTTAACTAGTCGCCTT  
CCAGGACTAAATGCTGCCAAGGCGCAGGCTGCGACTATATATGAGTCTATAGGAACAGGCTTAT  
GCGTAGCATTGTCTGGTATATTGTCAATTTATAGCAGTCATGTGTCTTGGAACTACTGATTTATC  
TGCTGTTACATTCAATAAGCTGCTCACGCAGTCTTCATTGGTTGGACGAGCTTTAGTCGGTGTG  
CGTAGCTTTAAAGATGTTTTCTTTGGCATCTGGGATTATGTAGACAATCAAGTGTGTGAAATTC  
TTTACGGGAAAAGTCGCAAGAACTTGGATTTGTTGAAAGAATATCCGAGTTTGGACTCGTTGTT  
GTCCATCTTCAACTACTTTACGACACGGTAGATGCTAATGTGCTCATTAGTTGTAACCGTGCA  
GCATGTGAGCTGTTGGTTAAAGCAGATAACCTGTACCAAGGTTACCTAGATAAATCGATAACTC  
TAATGCACCGAGAGATTTTCGTGCGACTCAAGGAGGCACGCAATTCAGTTAAGGACTTAATTGC  
AAAAGCTCAGGTCTATCTGACATGTGGTGATGGTAGTCGAGTTCCTCCGGTGGTAGTGTACATG  
TATGGTGATGCTGGGTGTGGCAAACAGAATTGTGATGGCGTTACAGGATCACTTTGCAACTA  
AGTGTTTTGGAGAAGTACCCAAGAAAGACGTGATATATTCCAGGAAAGCTGAAAATGAATTTTG  
GGATGGTGTGAAGCAATCACATAAAATTATAGCTTATGATGATGTATTGCAGATAGTGGATTTCG  
GCCAAAAGCCAAATCCTGAGTTATTTCGAATTTATTAGGTTGAACAACAGTGATCCATATCAAG  
TACATATGTCCAGTGTCCAGGGATAAGGCAAATACATTCATAGCACCATCTTTTGTTTTTCGAAC  
CTCAAACGTAAATCCAGGCACGTATGTCCCAAGTCTATTCATAGTGCAGATGCATTCAGACGG  
CGTTTAGATCTATGCGTTTATGTAGATGTTAAAGATGAGTTTGCACGCATCGTAGCTGGATCTA  
AGGGTCATCGTAAGGTCCCTTGTGAACAGAAGATATGGCTCCATCAGAATCCAGGAAAGACGCA  
GCAAGACATGAAGCAGGAAATTTATGTCAGGAACATAACAAGATCACTCCGGAGACAGCTGTGTAT  
GAGTTGCATGTTGACACTACATTAGCAGGCAATGCTCAGTCTAAAGTCTGTGCTTATGATGGTT  
TGGTGTCACTGATTGAACAGGTGAGGAAATTGCGTGTGCGGCCCATAGCGATAAGGTGGAAAC  
TGACGTCCAGTCCTTCCCCTAGACTGCACGAGTTATCGCAAGAACTTTTCCCAATACACAT  
GCCGGTGTAGGATTTCAATTTGCAACTGATTGGTTGGGCGATTTTCGATCGGCCAGTGGAAGCAT  
TATCCTATTTAAATGAAACATTGGAAGCTCATTTTGTCTCGCGGAGTGCGAACGATGGAAGCAT  
GTTTCATCCCAGCCAGTGAGGTTGCTGATCTGTTGTGTGAGAGACATAACAATACGAATTTGAAT  
GAGGAACTGGTGTATTTGACGTGGATGACGCAGATCACAGATAAGGAGTTAGCCTCGAGTTTAG  
TATATTTACAAAATAACGGAATGGATAAGTCAATTTGGAAACAGAGCGCCGAGCGTTACGCACA  
GGCCATTAGTCAGTGTAAAGAAATGCTTGGACGCGCATAAACGATTTCTTGAAGAATCATTGGATT  
TCCATATCTGCCGTTATAGGATCAGCTCTCCTAATAGGGGGAGTGTGAGTGCAGTGAAGTGTG  
CAACGAAGTGTAGGGTTAGGAAGATATTGCAGGATGGAGGTTTCGATCATGCAACTTGTGTTGGTGT  
ACGTTTCATGTATGTACGCATGCCAGTTATGCAAACGCATCAAGAACGGTGATTTGCGCCTACGT  
GTCCGAAATCGCTCGGAAGGTGTTACTACGTTTGTACCAGGTGATGTTAGGCGAGTTGCGCGCC  
ACGTGATATCCGCTGCGGATGTGTGTGAAGTGCCTGTTTCATCACTCATTTATACAGTCACTGTG  
TGATGAGGCTTTTACCGTACATTCGGATAAGGAAGAAACGTTCTCCATCCTTGATTTACCCCA  
GAGGCGAAAGGTAGAAACCCTCTCGAAAGTGCTGTAGTTGAATCCCATCAGGACTATAGAGCTA  
AGACTGCTGTGGTGGAAATCCCATCAGGACTTTAAACCCAAGGGCGCAATCGTAGAATCTACCAG  
AGACACTGTATTTACTGAGTCTCATCAAGACGTCAGGGTAAAGTTGCACCCACAAGTTGAATCG  
CATCAGGACTTTAGAGCCAAAATCCGACAGTTGAAAGTAGAAAACCAGACTATCAGGTGGAGT  
GGACCGATTTGAGAACTGAATCTTCCGACGACAGAAACGCTCAAGACATAAGTAACAGGATCCT  
ATCTAGGAATTTTGTGAGGTTATATGTCCCAGGATCAAGTCTATATAACACATGTTTTATTTCGCG  
TATGGACGAATGTTGTTGATGCCTAAACACATGTTTGACATGTTAAATGGCAGTGTAGAAATAG

TTAGTATAGCAGATAAGGGTAACTCGGGTTCACGTCAAGATACAATCCCACAAAACACTGTGAC  
AAGGGGTGGCTATGAAGTGGATATTGTAATATGTGAAATGGGAAATTCTATTTTCAGCACGCAAG  
GACATAACTTCATATTTCCCTACGGTGAAGGAACCTCCAGGATTAACAGGTATGATATCTTCTG  
GGCGGATGAGAGTCTTTTCGACCGCTAAGTTCAAGGCATCAGATTCATGTTTCGTACTTGATGCC  
ACAAGACTTTGTAGCCAAGTACATTGCTGCAGTTGATCATATAACATCCAAGTCCCAGAAAAG  
AGAAGTTATTTTATACGACAAGGCTTTGAAGCAGAGAGTGATTCATGCAAGGCGATTGTTGTT  
CACCTTATGTACTGTTTAATTCAGCATCGAGAGCTAAGATTGTTGGATTACACTGTGCAGGATT  
CGATGGAACAGCAAGAGTGTTCGCCAGATAATTACTCAGGAAGACATAATGGCCGCCACGCCG  
ACAACCTCATGCAGGTCGCGTGACTIONTGAATTTCCCACATACATCACTGCGGGATTCTCCTCTCC  
CTAATTCATGGCCATTGTTCCGTTAAGACAGCACCCAATCCAACAAAATCTGAAATTACTIONG  
GAGTCCATCCATGGATGTTTCCCGTTCGTACAGCCCCCGCTACCTTGTATAGCCCCAACAGAG  
AACTTATTAATCAAGAACGCAATGAAAGTAACAAAGAATGTGGAGTTGCTGGAAGAAGACCTAA  
TTGATGCCTGTGTTTCATGACGTAAGCGAATTTTGAATGCTCCAGGAGTGTCTGATGCGGAGAA  
GAGAGTTTTGACGCATGAGGAATCCATTACGGGTATTGAGAATCGTCAGTACATGAATGCATTG  
AATCGAAGCACGTCAGCAGGTTTTCCCTACAGTTCTCGCAAGGCGAAAGGGAAAGAGCGGAAAGC  
AGACGTGGTTGGGCTCTGAGGAATTCATTGTTGACAACCCGGATTTAAAAGAACATGTTGAGAA  
AATCGTGGACAAGGCCAAGGATGGCATAAGTAGATGTTAGCTTGGGTATTTTTGCGGCTACATTG  
AAAGATGAAAGGCGCCCTTTGGAGAAAGTACAGGCCAATAAGACACGCGTGTTCGCTGCTTCAA  
ATCAAGGTTTAGCCTTGGCACTAAGAAGATATTACCTAAGTTTCTTGACCATGTGATGACGAA  
CAGGATTGACAACGAGATTGGTTTAGGTGTAAACGTGTATTTCGTATGATTGGACGCGCATAGTT  
AATAAGCTTAAGCGCGTTGGTGACAAGGTGATTGCTGGTGATTTCTCAAATTTTGATGGTTCAT  
TGAATTTCTCAGATTTTATCACGAGTATCTGAAATTTGCTACTGATTGGTATGGAGATGATGCAGA  
AAATGGTCTGATCAGACATACTACTTGGAGTACTTGTTTAATGCCACCTGGCTTATGAATGGT  
AAGGTTTTCCAACCTCAACCATTCTCAGCCTTCGGCAATCCATTAACCTACTCTCATCAACTGTG  
TATATAACATGATCATTTTTAGATATGTCTACCTTCTAGCTCAGCGAGAAAACGGGTTTCCCAT  
GACGCTCTCTGGATTTACTACAAACGTAGCTTGCATTTTCTATGGTGACGATTCATTGTGTAGT  
GTGTCAGATAAAGTGAGTGAATGGTTCAACCAGCACGTAATAACCCGATTGATGGCTGCTACTG  
GACATGAATACACGGACGAGACTAAGAGTGGTTCACCCCCCCCCATAACCGCTCCTTAAGTGAGGT  
TACCTTTCTCAAGCGTGAGTTTGTGCTAAGAGATCATTTTTGGATTGCACCCCTATCCCGGAAT  
ACGATTGAAGATATGTGCATGTGGAGTAGAAAGAATATCGATGCGCAGGATGCATTACTGCAAA  
CAACGCGCATTGCTTCTTTTGGAGCTTCGCTGCATGAGAAGAGTTATTTCTTAATGTTCTGCGA  
TGTCATTAAGAAAGCGTGTAGGAACGCAGGGTACAAGGAAGCATGTTTACATGAGTTGGATTGT  
AAGAGCTTCCTTTTGGCCCAGCAAGGTAGAGCTGGAGCTCATGATAGTGAGTTCCTAAGTCAGC  
TATTGGACTTAAACTAATAGCACCCCGATCGTAAACTCCATGTATTGGTTACCCATCTGCAT  
CGAAAACCTCTCCGAACACTAGGTGCAGTAAGGCTTTCATGGAGTGGTTTGCTATTTAGCGTACG  
TGTACCATAGGCAGCCCCAAAACACGTGTGAGGAGAAAGTCCCAGTCACTTTGGGCAAAGTAG  
ACAGCCGCGCTTGCCTGGTGGGACTTAATTAATGCCTGCTAACCAGTTGAAATTGATAATTTT  
GATACAACAACCAGTGGAGGACTAATTCCAGGAGGTAGTGTTACAAACAGTGAAGGTTCTACAA  
TCTTGATGAATGATATCCCAATCACTAATCAGAATGTAGTGCTGTCTAAGAATGTAACAGATAA  
CCTGTTTTGAAGTCCAGGACCAAGCTCTCATTGAATCTCTCTCTCGCGACGTTTTACTTCATAAC  
GACAGTTGGACATCTAGTGATGATGAAATTGGCACAACCTATGACGCAGGAACAGCTTGC AACAG  
AATTCAATCAGCCACACTTATATGAAATTTCCCTACCTGATGACATTGTACGTAAATCGCTGTT  
TATGTCTAATAAATTAGCGAATATTGCATATATGCGATGTGATTACGAGGTTACTGTACGAGTA  
CAAGCCACGCCCTTTTTACAAGGAGCATTTGTGGCTGTGGAATAAGATGAATGCTAAGCAGACAT



CAATTATTCGACGCACTCTTACAGAACACCTACGCTCTATTACATCATTTCTGGCATTGAGAT  
GAACCTTGCAGTCTGAAGCTCGAGCTATTACTCTTTTCGATTCCCTTATACTAGTGAGTTGCAGGTT  
TTTAACCCCGAGAAATGTGAATAACCTAAATTCTATTTCGGCTTTCCGTTCTGAGTCAATTGCAAG  
GCCCTGAAGATGTAGAATCCGCATCTTATTCTATTTATGGCAGGTTGAAAAACATCAAGCTATA  
TGGGCATGCCCCATCTGTGACATCTTCAGTATATCCGTCTACTCAGTCCGGATATGATGATGAT  
TGTCCCATTTGTGCATGCGGGAAGTATGAGGATTCTTCTAAACAGGGGATTGTCTCAAGGGTTG  
CAGACACCGTTGGTGCAGTGGCAAATGTAGTAGATGGGGTAGGAGTACCTATTCTATCCACAAT  
TGCCAAGCCTGTTTCCCTGGGTGTCGGGCGTAGTGAGTAATGTAGCTTCAATGTTCCGATTTTCA  
AAAGATAGGGATATGACGAAAGTCAACGCATATGAGAAGTACCTGGTAAGGGCTTCACTCATG  
GTGTTGGCTTCGATTATGGCGTACCCCTGTCTCTTTTCCCTAACAAATGCCATTGATCCACAAT  
TGCAGTGCCTGAAGGATTGGATGAGATGTCTATTGAATACTTAGCACAGCGACCATATATGCTC  
AACAGATACTATCAAAGGTGGTGACACTCCTGATGCGCATGGAACAATTATTGCAGATATTC  
CAGTGAGTCCGTCAATTTTAGTGTGTATGGTAAAGTTATTGCTAAGTATCGCACCCCTATTTCG  
TGCCCCAGTTAGTCTAGCTGTAGCAATGGCCAATTGGTGGCGTGAAATATTAACCTTAATCTT  
CGCTTTGCTAAGACGCAGTACCATCAATGCAGATTGCTGGTGCAATATCTCCCCTATGGTAGTG  
GTGTTCAACCAATAGAAAGTATCCTTTACAGATCATCGACATCTCACAAGTCGATGATAAGGG  
TATTGACATTGCTTTTCCCTCCGTCTATCCCAATAAGTGGATGCGAGTGTACGATCCAGCGAAA  
GTTGGGTACACGGCAGATTGTGCCCCAGGCCGAATCGTCATTTCCGTTCTCAATCCACTTATCT  
CAGCTTCGACAGTCTCTCCTAATATTGTCATGTATCCTTGGGTGAATTGGAGCAATTTAGAGGT  
TGCTGAACCAGGTACGCTTGCTAAAGCAGCCATCGGCTTCAATTATCCAGCAGATGTTCCCTGAG  
GAGCCCACTTTTTCAGTAACGCGTGCTCCAGTATCTGGAACACTGTTTACGTTACTCCAGGATA  
CGAAGGTGTCTTTGGGGGAAGCTGACGGTGTATTCTCATTATACTTTACGAACACTACCACTGG  
TAGAAGGCACAGACTAGCTTATGCCGGACTGCCTGGTGAACCTCGGTAGTTGTGAGATAGTGAAG  
CTACCTCAAGGGCAATATTCAATTGAATACGCAGCTACCAGCGCTCCAACCTCTTGTTCTCGATA  
GACCTATCTTTTCTGAACCGATTGGCCCCAAGTATGTAGTCACTAAAGTTAAGAACGGTGATGT  
TGTTAGTATTTCCGAGGAGACGTTAGTAACATGTGGTAGTATGGCAGCGATTGGTGGAGCTACG  
GTCGCATTGCAATTCGTGGACGAGACAATTGAAATTCTGAAATTAGAGTCAGATTTTGAGTCCA  
AAGCTCCAGTGAATTTACTCCAGGTAACATAACCGTGGTCACTGAAGCTAGTGATGTTGAATT  
GGTAACAAATCAAGATATCACAGTAAATGAGCGTAACCCGCGAACCCATGCGGGTATAGATGAA  
GAACCGCCAGTTAAGCAATCAGTCATTGGTCGCATTGTCCGTAGAGTGGCTCGATATGTACCCA  
ATAAGCTTATCAGACGTATTCTTCGCGATCTATCGCAATCTCCATGTATATATCCATCCACACA  
TGCTGGTCTGGACTACTCCAGCTCAGACACATCTACAATGTTGACTACAATGGGTGAACAGTTT  
GTCTCTCTCAGAATGTTAACTAGACGTTCCAGTCCCGTTGACATTCTTAGAGGCGATTTGGTTA  
CTTTGCCCGGAATTTCTTTGGCACAGATAATTCATTACGCCAGAGCTTAGTTAACATTATTTT  
ATATATGTATAGATTTACTCATGGTAGCATATCCTACAAAATTATTCCTAAGAATAAGGGCGAT  
CTATATATTACTACAACGAGCCAGATTCGATCGAAACTAGTACTAGTGCTTATCAGTTTGATA  
CTAACCGTGCTATGCATTATATTAACACATCCCTGAACCCTATGGCTCAAATTAGCTTGCCTTA  
TTATAGTCCAGCAGAAAATTTAGTTATTGATTCCAAGTCTTTCCCTCAATTAAGTGATTTATCA  
ATTAGTAATTTGGAAAGGACGGAAAATGAGTACTTTGTGCTTGCAAGTGCTGGTGATGACCACA  
CTTTCTCTCAATTGGCAGGATGTCCAGCTTTCACTTTTGGACCTGCCGAATTGGCTTAATTTAA  
CACCTTCAGGTGTAGACCCGTCATTGTGACGCGTGGGTTGAGGTGCCATGAATTTGTCATTCA  
TGGTGCAATTTATCTCAACAGTTTTCCCTAACCGCGGTTGCGCGGCAGGGTTTTTACTCTGAGA  
GATAAATGCCTGCTCACTAAGGTCTATTAGAGACATTAGTATGATCCGGCTAATAGTCGCTTTG  
GATGACCTCCAAAGGGC

> WSSV | consensus genome | WSSV\_Consensus\_Genome

atggcgtacattgaccaagggcgctttggagccaaatctgtgatgcagcaacaataccttcttc  
cacctctaataaggctctccaaacaacaacctccactggcatcatcttctcttcaaccttcctc  
ttctaataaacctaggagtacatcaagagtaacagacatatttgttgtgataacttgtgttggt  
ttaattgctgcttttataagcaactcatttagtgttacaaaaaatgtggtaaaacttttctaaag  
aacaacccgagaaaatactagaaaaagatttgcttgataaggtgtacaaattgtttgaaaattt  
aaaggatggaacatttggtataggggaagatgaggaggaagaaagggaggagagggaggaaggg  
gaggaagagcttgaacaacataagacttaaaagaaagtggaaagaaatgactgaacaag  
gggatcaaggaataaaagtaaggaattacatggcccagaggagaaagaggagaaactgggtcc  
agcaggagcagttggccctgcaggccctcaaggagaaagaggagcaattggaccggcaggaaag  
gatggagcagttggccctgcaggccctcaaggagaaagaggagcaattggaccggcaggaaagg  
atggagcagttggccctcaaggccctccaggagaaagaggagaaaatggacgcccaggaagaga  
tggagcagttggccctcaaggagaaagaggagcaattggaccggcaggaaaggatggagcagtt  
ggccctcaaggagaaagaggagcaattggaccggcaggaaaggatggagcagttggccctgcag  
gcctcaaggagaaagaggagaaaatggacgcccaggaagagatggagcagttggccctgcagg  
ccctccaggagaaagaggagcaattggaccggcaggaaagagatggagcagttggccctgcaggc  
cctccaggagaaagaggagcaacaggtataccaggaaggatggcgtggacggttctgtgggcc  
ctcaaggagaaagaggagaaaatggacgcccaggaagagatggagcagttggccctgcaggccc  
tcaaggaagaagaggagcaacaggacgcgaggaagaggatgggtgcagttgggtcctgcaggccct  
caaggagaaaagagagaagctggtaaggacggttctatagggcctcaaggaatacaaggccca  
gaggagagactggaccaccgggaagggacggcactgcagcagaaagaggagaaagaggcttccc  
aggaccaccaggcgaaactggaccaccaggaaaggatgggtgtggatgggttctgagggccctca  
gggaaaagaggagaaacaggaccggttggacctaggggtgaaccaggcttagctggcctcccag  
gaagagatggagcaattggccctgcaggccctccaggagaaagaggagcaactgggtctaccagg  
aaggaatgggtgtggatgggttctatcggcccccaaggaagaagaggagcaacaggccgagcagga  
aaggatggggcagttggccctgcaggccctccaggagaaagaggagcaacaggtataccaggaa  
gggatgggtgtggacggttctgtgggccctccaggagaaagaggagaaaactggaccagcaggaag  
ggacggttcagttggccctgctggccctcaaggagaaagaggagaaaaatggacgcccaggaaga  
gatggggcaactggccctataggtcctgctggcctcaaggagaaaaaggagaaaatggacgccc  
caggaagagatggagcaactggccctatagggcctagaggagaaaactgggtgcaatgggaaagaa  
tggcgtggacggttctatgggtcctcaaggaagaagaggagcaacaggccgagcaggaagggat  
ggggcagttggccctgctggccctccaggagaaagaggagaaaactggaccagcaggaagggagc  
gttcagttggccctgctggccctcaaggagaaacaggattaactggcagcccaggaagagatgg  
agcaactggccctataggtcctgctggccctcaaggagaaaaaggagaaaatggacgcccagga  
agagatggagcaactggccctataggtcctgctggccctcaaggagaaaaaggagaaaatggac  
gcccaggaagagatggagcaactggccctataggtcctgctggccctcaaggagaaacaggatt  
aactggacgcccaggaagagatggagcaactggccctataggtcctagaggagaaaactgggtgca  
atgggaaagaatgggtgtggacggttctacgggtcctcaaggaagaagaggagcaacaggccgag  
caggaagggatggagcagttggccctgctggccctccaggagaaagaggagaaaatggacgccc  
aggaagagatggagcaactggccctataggtcctgctggccctcaaggagaaacaggattagct  
gggctgccaggaagagatggagcaattgggtcctcaaggagaaaagggagaaaatggacgcccag  
gaaaggatggggcaactggccctatgggtcctccaggagaaaggggagagactgggtcctatagg  
tcctgctggccctcaaggagcaactgggtcctccaggaaggatgggtgtggatgggttctgttggc

cctcaaggaaaaagaggattaatagggcgcacaggaagggatggggcaattggccctgtaggtc  
ctgcaggccctaaggagaaacaggattagctggcctgccagggatagatggaaaggacgggtc  
cgtgggtcctcaaggagcaattggacctatagggccacgaggagaaaggagaaaactggacga  
ccaggaagggacgggtgaggatggttccacaggccctatggggccccaaggactaagaggagcta  
cgggagctccaggaccgcaaggagaaagaggattaaagggacggccaggaaaagatggtgaaac  
aggtcctccaggggcgacaaggaagggatggaataatgggtcctaggggtcttcgaggagaaaa  
ggagcacctggtaatgatgggtctagagggacctgaaggaagagatgggtgcacctgggtcccgtg  
gccctattggacctcaaggaataagaggattaaaggtatccaggggacgaccaggaagagacgg  
agaaatgggaccagccggcaaggacggaatagaaggccctagaggtcaagatggaacaactggc  
gctaaaggacctagaggattaaagggttttcaaggaagaacaggagaaaactgggtgcacaaggat  
ctagaggagaaaaaggcgatagagggctaacaggccctcaaggaagagacgggtccaccgggtga  
agaaggtcctcaaggtcttagaggagaaaggggagcacctggccctagaggtcctagaggtatt  
cgtggccgttcaggacctcaaggaagtaacggcgtgcaaggacctcgaggtccccgaggaacaa  
aaggaagaacaggaatacaaggcctcactggcatagaaggtcctcgaggtcctagaggtataca  
aggaaaggaaggaagaatggggaaaattggacatcgaggagaaaaggggtgataaagggagaccgt  
ggagaacaaggcatcgctggagcagacggggaaaaaggtccaagaggtttacgaggaattcgag  
gccctattgggtgctcctggtaagcctggcacggaaggggttagaggtcctagaggggtgagagg  
tgttcctggctatcctggcgcacaaaggggaattaggtccccaggaccaacaggtcctcaaggg  
ccagcaggtcctcaagggccgatggggcgtacaggagatactgggtcccatgggcccctcctggag  
cagtgggaccaagaggagagaaaggaggtagaggaagaaagggaaaaaatggccctaaggagc  
ggacggaaaagatgccgtaaatatcatacaaaaatattcaatcaccatgctcgtgcagagata  
atgtgggaaggaatgaaatcgagagaagcatacattggaagatcttatggaactgatacaatcc  
ctgtgatgatagaaaatagaatagggatgacaaatgaggacaaaaaaacgaatattgtataca  
agtaatgacaatgcaactcaataacaactagaggaagaacatcgggtgtttttgggtaagcaat  
aagacagattataccttttagttactttactgatgccagaaagtgtttcctgtagaacagatg  
tcagtacaaatgagaggtcagagaggggtgaatgctgttagagaaagagaaaagcaaatcgtacag  
atatttaggcccgtctgaccaatctataggtactcattcacgttcaaaaattgccgtggtaatg  
tatccagacgcaagcatgagttactcagttgatacattagacgctgatgtggcgcgaagagaaa  
caacgtctgtgcttttattagcagaaaccatacacggggaaaaagatagaggtttctatgctga  
tagaggaactgtagggagggtgatgggtacctcccactgaagaagagttattgggtattgcaagcg  
gatccagacatcccccaacaatcgagacccgattacagtagcagaagttggaaccctgtcgc  
tgaggataaaaactccttcatgtgatgagttgaataaattcatgagattctctactaatttctc  
atttttaaaatacgtcaaacggtttatggcgcagagagcttcatctaatagttaggaatgatatg  
tccgctttcttattagatttgatttttgaaaaattgatagagtttttattatcaacaggatgga  
atagagaagctctgggaggaactactggggctattcttatgatcaggacggcaacttgtcgtct  
agcgaatcttattaccccctcctgaaaccggttggtatggactttttgcaaacacctgggttt  
gactacaataaatctttccctaacaatgaaaggtatataatgaatttcaagctacaatgtaaa  
taattgggtaataaaaataaaggtatatttttaaaaaatgtgtttatttttcccaaccttaaac  
agatcattgccaggagaaaatcgcatacttaacagataatgcctatttgtatcatcgatgtcct  
cgtcaaacggttgctccaaacacaagtggtgatcctatttttcttcaaaaactggttggtttgaa  
atataatacaaatgttagctgaaaattcccttctctgtagcatttagacctggagacagtgaa  
acagagtcactgttatatccctctttgtattattgtatactcttgcatacaattctaattctt  
tagattcggctttgtttacatttagtggtgtcctcgtctccaagtaagatgtgaggattat  
gtctcctttctttttaccagttcagaatcggacgttccttggccagctacataacctttcca



catcgggtgaataaaactcaaggaggctcctcttccccaccatccgagcctatthgataatttta  
gtggaggaaaaacatcagcagtatctgctggaacagtcacgcacagatatgcatttcaaatt  
ggttgaacatatttttaaggtctcctttagaaaatggggctccctgtggagataaaactgaaagc  
gggaagaagaagatgaggaagaagaagaagaagaagaagaacattccatatcaagattcgtgc  
ttcaatttatgaacggacacaacgggcaacattatcataggcccgaagtgcttctgtttactt  
ttgtgattattatgactatthggcctacaggaatctccctaagtacaaattatcgtcaatg  
catcctggcacattcaatatggaggatttacctttccgccctttcgcagtaccttcaacttata  
agacagaattagagtacaaaaggtttgtgcaatcaacaaatcttccccagctaagtttcgacta  
tggggagtttttatgttactgtatcttcggagcagattgggtacaaacacctgggggatgtggta  
gattctctagaaaatagttccatgatatcatttgattctcagacattgagtggtgtgtataaga  
acactgctaattacaaaaggttggggaagaagaagaacggaatagccgatttgccggttaggag  
tatggcagaatttatccgcactgaagcgcataaggcattgacagcagaagagatggaagaagaa  
gaagaggaagaagaagcgggaagaagaagcagatggaccaggagcctgcagaagtagacttcctt  
cagtgccctcatttacgccgtaaaaattcgtcaagctgtttctgtgttaataactttgtggagaa  
cgatctttctatattggtttctaacttcaagaatgtgttaaccgatgatactgtatcaggaaca  
gatacggacaactttggttctagtggagaatttgaagcattatcttcccatttattcctttcaa  
gaatattggatgaagtgcacattcttaggaatactgatatacaaaagaaccctatthtcaacgca  
cgtgtctctgtcggataaatctccccctagccgtgtccgtggaagcaatgtcaactttaataat  
aacgctgggaacatttcttccctgcaaacgtatggcggatagaaagagttgcctgaaaatgtac  
tagtcggtttgtccggaggatttgaagataccgacatgtattccggagaggatgthgtgtcgt  
atgggatggttgtgatggaggaaaagtgctaagtgacaccttcaattgtgggtgataattht  
cagctccatgaaaaaacagcagaaactthtaaggatgatacggatttagttgaacgaataagag  
atgtgcttcagactgcaagtaagaccggaaccttaacaaaaagcatattcaaggaagaacat  
ctacgctgttttgctgaaaatggcattgagcgcctccggggacgattttacagaaaagggatt  
gctctcaaggataaaacaaatcaacccctccccctgcaagaagtccaagataacggttgaag  
gagtcaagggattthtccagcggttthcgtgacattthtgagacgagggcgctcaccacatatag  
tgcagaaaccttcagagatttaggccaaaggcatagtaaaagagaccgaaggactgacagctgca  
acagtggcagaaacatccttctctgaaggthtagctgaaagthtaaggctgatgcaatctag  
gtctagaatthtccagaggacgcaaaaacggthgtattcaaaaatgacacctctcgttcttht  
ggaagaaactagggcattaagagcaacaatacttctthtctcgtcgtthgcaagggacatgggc  
gtccaagthtagtgccgatttagatgctgaatthgctgcagagatgagagaaacataccccgatg  
cagcccttgaaacaaaacttgaaagatctcgacaaattcgaagagactataccagaaagtcaagt  
gaagaaactaaagaaaatagacagthtattgacagagaatccagaaagggctggcaagaaatt  
aacgacactgaactgtcaaaggctacagattcagthattggggaagaactaggcaatgcagthta  
cagthttgatgaacaactthggaaaggthacaattgtagtaggggcttctgtggtggccgggt  
thtaggtccagccgctgtcgcctgggtgcatgctccagaggggcacatctcaacgtcgtggac  
cacaccagccctaaaggthtcatcagthataaaaattgtggactthtctgtgcagatagaaaca  
ccggatgggctaagccaaccaagcaccgthcagggagaagaatagaccatgthtatcgcactaga  
tgcacattcttaactgaaaatggagcatatgtattccttgaagacggaggacccaaatcgaaa  
tataaggcctacgcaccaatctgtggaacaaaagatgctgctcaaggagaatgtggatctthgg  
caacattcgacgaccgcattctgtattgcctthgggtggcaagcatgaaagattthcctaaagg  
acaatccctctcctgcgataaaaggatgtccactthaaaggcagthtcttccgttctthtgtcc  
ataggaaaggatgthtgcagaggctatthttaggthtgcagaggacccgtggthgggtggcga  
gcaaggcaatthcagctgtaataaataacccctgthtcatatthggagtgccctthtggattthg

tatagctgctacacgcctcaatccatccaactggaaaactggcctcattgtatthttcaatacta  
ctagtggtcatactgatagttcgcttctttgcagggtcgggccgctaaccctgaattggtttg  
gtgcaaagaattcagctaaaaggaacagactgaacaattcgaagacgggggaggaaatcgttc  
aaaaatagtattggcagaaaaggacaacgccaatagtaaacttcaatcgaggaggaatgaaact  
gggccatgagattagaggagcttctgggcatgaagatttgcgcccagttttcttccctgcc  
caacaaattattccaaatctgccaaagattctgggctacaaatctaaacccttcaacgactttta  
tacaaaaataataaacacagacatcataaaaatggataggtaaaataacacattaaatgtatat  
tttatatathttttatttttagtaacaataaagattatacatgtataaaaattgcattgthttatt  
cctatacaccaacaatagatatagacttatcactaagattataagtttctgatgacgthtttcc  
atcaccattctgatthttatttcttcttctccaaaacagattgcattccgtgtccatcaaca  
tccgtgttcttcttgaagatgtgggttatatatggctccgacatatcttgtactgtcgattgga  
tagthttcagctagggaatgthtttctgggtccaaattctcctctcccataacggatgcgacgata  
agcttcagcagaagccagcaggcaaaagtgggcccagccagcctcgtcagtacacatgggggtgc  
ttcagagthtttgttctattgtgcacatcaacatatgccataaaatcggaatgggtcaagtgca  
tgtcctthtaatttaccctgthtttgacaagtaagtgactggcaactgthttggcagtaaatgttc  
attgatatgagaagtggagtathtttcttgtttagaagcatgtcgtatatagagagcgcacagct  
aaggcagthattgtctagaataaagaaaacaccaacaacataggccaattcattcgthtttagtag  
ttattacaathtttgttccacatgggtcataathttctcagaaaagtctcctcaacaggggaattata  
gtacgtgatagaattgcagtgataggcacaggcggatattccgacggctcttctccgagaatat  
thtgtctagattgaagcattgcagcaatctcctgthtttagcatggacaacctgtatatcatcacg  
aggcaaaagattgtcctttgatccttttgataaagcttcgatgthttataaaggaacctaaaagt  
ttccacattatagcaatgtgataaaagctgtccaacgaagcatatacagcagctgggaaagttg  
tccatattaattgccactttgtaacgcagaggctaaathttcaaccccgatcttgttgctttg  
gcagatgttcgccatccaatctagthtttgttatcgtatctagaactggggattctttagccagt  
ttgactgcctcccctttcggttctttggggaagtaaaactggctccttttccagtagagttggtht  
ttatgthtttctctgatgcagattctccaaaatataacagthttggcgaataatggagtcaactc  
aatagtatcactcttcaactaattctatgtccctttcgattagttggcacacgtctttatctagc  
ctcatcctgttagagthttcctgtttcggctgctggtgctgtcgcagacgcagthgtattagtc  
catcagatgcgtccagtatggaattgggaggaggagctgcaacagataacatggcagtaatatc  
atggatgathtttggagtagtccagthtctaatacatcaaaatcctgthtcttccccttccctcatt  
ttgttgggtgtccatgtttgaggagggatggthttgttgatactaccgagctcatgcccgtacaccg  
aatgacgagaggaggtaggagcaggccctthttatagccctaaagggccattatcgacagthact  
attatagaagthattthttatccctgatattatacaagcagagaaaaathttcagthtacttgcag  
gagacatctthtttaataaathttagggagtcttctccaagthtttcttcttattggthtttctgtth  
cttgtctgttggthtttttgagtctthttgttgttttagcttatgtathttggggthttgcccgattacgg  
tgcctcttcttcttthttattcctgtcagcaagtaaaatatcctthttcgtacttgataaatctat  
caacgthactthtttatttagcctgtthtctggctcgtggaattccgtgaagaagatcgtagaaagth  
tgcacagcagatgtggattctgtatctgaatcttcttctcctcctcctcctccaagaagagaatcg  
acgthtagtgtctgattcagagthcatattcttcttcttcttcttcttcttctcctcatcgcttgaaggga  
tggccgaagacgtgggagaagaagaggaggatgaggaagaagatgtagaagtagaagccattht  
thtggthttgttggthttacctgccatgttctcctcctcgacatcatcttcttcttcaatcttattc  
agthcacgthttcaattgctgctgataatgccttgtgtttgttacagthgttagaccataaagccc  
tcttggaaagcagccgatgtccagggtccatthtctgatcgcgtacatctaaccttagcaataac  
cagaaatacgtgctthttthtttactthtcagccagccgtgttagthcatctacggaatggthgtctt

tgtctttagatgaggagtcgtacaggcaaaatgtgggtaaacccttcaaactcgcctgtgcagtt  
atcaaagcatatgtgatcaaagaaccttccgcacctattaaatccaaccataaaagagtct  
atgtgttcattaacaaaaactatcttcttagtgagtgtagttcttcttattgacagta  
ttatgtccacatcgtgcccgattgtgttattttatcattgatgacagaaatgtcgtgaagcact  
ttctccttcttcttccccactcccttctgcttggtcctcctcctcgtcttcaaattcttcg  
tcgtcgtcttcttcttcttcttcttccccgcaaacctctcctcgtttcttcttcttcgtcattta  
ttatatgtctcctaaaattcttgtccaataatgtgtaatgaaaacacactctggcttcttct  
gaccttaagaaacttgcatccatcatgctgttcattctcatatcaciaaggccatcataccta  
tcctctctggccatgatcgtcttgacgctcaagaatataatcgtacataatcttagactctttt  
taggtgagaaaagtgggtttggaactgtctaaaattaatgaaaccacgggacaatttcttagc  
caaaccagaagatgagaacctccgtacccttctctgtgggaatgtgctagtgcagcattatgt  
atagtaaaaagcaaacaggatcttcttagccaaactctgtataacattagttgccgtcacta  
caggtatgagattgtcatatctaattcaggtacatctaaacattcactgataggaatcactcc  
ctcttctctccttgaccaacaattctcacgctcactagttgatgtgcatcttttatggctcta  
tcataatcatgggggaagttgatagagctaacgttgtagcattttcttcttgcaaaggtaaac  
acccttcgtcttcatcattgtcgggaacatcttcatcaaagtccatgccgttattgttattata  
tgccattatattagagaaaacatccatcttctattcctaggaccagaaggagcattagagca  
gttaatgaagggtgcatcactttctatttttatgtccttggaagtaacttcgttatttttcgtat  
tcaaagtgtctatcagggcagatgctgcatcacgcaactcgttctcgcgtgggagaagattgtc  
acaatcagatttaaagtggactaaatgcagacacaaaattagaaaaaacgaattgagatgcggat  
ttaacaatggacaatatttgattatgaggaagtaacagcgtgaaagaaagagcatgcccaagat  
cgtctgatgatgtgattttatgtttgggacactataactactagcgtatgtgcatcgcgaggac  
aattacttcagtgaagataccattttctaacgtcaaacccttctacgaatgcaaccctcctcta  
tttgcctcatcatcatctttgaaaaatgttccatcaagtgtacctttgtcactactggctgtga  
caatctgtacgatattccccatagcttttaggactaaccttgatcgataaattgttccctcat  
aactgcggcagcaatattctatggaattattactgtatctatcggcatatgttcttgcctttgaa  
tctttgatcctcttatccaaactatcaaaaaatcttctctctcgcgggagctctgtagagaata  
tgaggaaactgagggactgaaagttgaccgtttctgtgagtcctaccgatagctctgtaggaaagc  
aatggcgttataaggtacatctaaaacgcaatggtaacgtttagcgtacatggagttattagaa  
gagtcattgtaaagagagaccggtattgccttttaggtcccagcattataacgtcgaacttcttctg  
tgtgttgaaatgcactaatacatttgtttgtgttggtcagtttttagtggtgtttttaaccagaaa  
caatcccctattcgttatacgcgaacacaaatcttctgtttgttatttccagcgttactatcctcc  
cctattgattgtgtgattgaatctataggggttgcctgctagcgcctatgagcgggtccctgtcag  
ggactgaaggcacaagcataacgtgagctggggaagttcttctattggttttattctttaagga  
gattgtgaaagctgaagccatcatgactgcacggcaciaaagctctatagcctgagaatattgta  
ttagcaacaggcgatgaatcgaatgtccccacgtctacgatgccgtattttgcgtcactttcat  
ccttggcgatcgtttgtaagatgcgtgtagtcacaaatcttgagaaaagaatccccagtttgctc  
tagtgacatgaccatctttttgattcgtttgtgtccttaaacgcttactgcatcgggtgaca  
gaagttgccttgatattcaatagtgacctttacatgctgccacagaagtaacttgctgtattaa  
tgaagtattgtctcctcaacttttcaaaacactcgtcgtcaaatacttcaacccatccgtcttc  
ttcatttagcacctcgtcataatcttctgttaaaatcagttttacctttggaagggttttcttct  
ttcttgatagcatcgtataaatcttgagcaaccatataatgctgcttatgtcaactccggag  
acgttattattcctcctcctcattagaaagcgcacatccttttctgtgagtaggtttttatagc  
atcttgtactataacttcttagtggtgttttcccatcatgtgcgacatccctatcgcgcacaacc

accaccttaaaacgcctgtcgatattttccattacttcatataaatcatcatcatttgcagcac  
gtttcctctttctggacggggaattaatctctgctactaatttttcaacatcttcctcttccaa  
tattcctccttcttgggtgttctcgtataatctttgtgaaggcccttctgacatgtcctcctact  
ttttcagaatcgatgagtagtacttgtctagcgtttaaacagtagaagccaattcgtctatagcgt  
atttttgaagaggggaggctttacaattagtagtagagcagtcgactccagccatgctaatact  
cctactaaccaattgtcctctatttcttaaaagttaataacctgttccagaaacactgtcacg  
tactcgtgtgtcagccatagcatctggagtagcactggacacttctttgaaggcttgtatgc  
tcgtgtaggctggcgcacttttcttagtatgtggcaatcatgtgcaaatacagcattgctctg  
gaatggcgtagcgtggccataaccgtgaacgtatcatactttaagatctctaagaaaatacgg  
aacgcatcagcttgagataatagtttcaagtagttggacattgtaactcggcccttattattgg  
atgatttcatgcttctactttaagtttctgtcgtcactcattgcactcttgaacctattaat  
aaggctctgacactgaagggtttgcccctttttgtatgttgogcaaaactctagtatcttcttcc  
tcccaagtctttgccagttcctttctaaaagagtcactaatattttgagtcttgtggaactcgt  
cacataataatgctgtgacaaagtgtcaatgggcataacctgttggaatcgaggtctgttcc  
tcctgttataaatttcagtacaaattccagattcgtgctaaatcagagtagctcataaataaa  
atggtggcgctttctgttaagaaatctcctattgatcttgaagaacgcttactatgaaattcct  
taacatccctgagagtgaaaaatctaataatccaccgagctttagcagacgatacagaattttc  
cacatctactgtcatggaccacttttcccgtcgtcttgaagacgcttggtttattagcacia  
ggcacttgtagttttctccatgaaaatttaggatcacgaagacctctagaatttgtaaccact  
ctcgcacgtcctgttgacagctgttgaaaagaggcttagagcacgtcaaccatataaaaaagg  
gtgccttttccacacgcccactgttgatggcogtaattaccttgtccgaatcttgacaaaaat  
gatggccctacgtgtttttgtacatctaagagtgccttttctttagtatgacactcatgacga  
aggctgccaattctcttgtttttctacaccagtagcatctccgatgataaatcctccactcgt  
tttcttgtccactttaaaattcctttcgaccttatctttcacaaggctctataatggacatgtt  
ttcttccaccctctccctttgtagaattgaatcagggttagacgcactgctagtgcctgcacag  
aattaatgtccatcggccgaggaagaaatggggtaggcatcggttacatttttgcagaagcc  
caccgaccggaatgtttcactctcataaagagcgaatgaaggctctgggtgggagaggggtgcca  
atctctttagcatcttcttccctccagaaataaaagtgttgagccatggtaattcaaccagaaa  
atcaaccaatataatgttgtaacaagaagtgccttaagaagactcttgtgtacttttttacga  
tacttgaacgagtagcctgcacggatcaaaaatttgggtatactgggttagctgctatttttgg  
caaaataatagtttttattttcccatgctaaagagaaccaggagttacgtacagccatactagt  
ctctacaagtaatcgtctataagcctcagaagtatccacaccgtccctgaaccacgaagtttct  
tgcacgtccgccttcttatgccccactcgacgagtgacttcttgaatagagagaggggtgtta  
ttgtagctccttcgggggttgaggaaatgtttgacgcatcaaacgctagacgaggggtctgactg  
tactaccgggccactcttgggggttatgatccaaacgaaacgattgcaaaccacgcatcgtcg  
tcaatatccactctgtactcggatgaggaagatgatgttccgaacaatttttacttccgggag  
ttacattggagcaatcaaaatagctggggattgtttcgctgtcaaatatcctattgtggtctac  
tgaaaaaataatcgtcggtagctccttcttcgggaagaacagagtaggatgtggggaaagcgtac  
tgcaaaggattggacactttcaatgtactggaagtttttgatgcaggttttccttttaggtaat  
ctaatcaaacatctctcgcgtagcacagtagcagcataaggtccgtatgaacgcattaataa  
cccctctttcaatacaaaagtatcctcagatttttttatgatatgtcttagaaattcttctcct  
ttcattaaactatccaagaacttgatttgagataatcttacttgtcctcatccctctcgcgt  
gtttctttattacgtattctgtctgagacaatctcctctcatcgtttaaattacgttcaaaaa  
gtcccttattttctccagcctttgggtcacctgtagaattgtactctggagctggagtagctcca



gggggagttctgatataagaggaggggtttatTTTTgactcaaaagtgtagagaataaaaagttcag  
atccgccgtgaacactaccgaaaccatgcgactatTTTCgcaacattctgtggccaacatact  
atgTTCatagggTTTTgaggtatgTTTCCggccaaaacattagctgctggctcaatgtaaaag  
ggTgcagTcagaatggcctatgctgCCCCgaggaaggtttgttcaggacgggagctaaacaac  
TTctatgtaacaatgaagacgggCGgatgattacatggggaatTTTTctagaggaggtaaaac  
agtGctaggtattggTacaagagcacattcttagaagtatttGTTgcatccaggTttaaaggc  
gtgatgatgggCGcttgggCCagTgcaattTTTcttggcagtagTTTCgtcgatacttgatttag  
gtctTTTgctggTgaatctggTcccctctTTTtagattggTcggccaagaaaattcccatggcag  
aacagTcccactaacggTgtcctgtcatcgcctattattgcatgcctgTTTgagTcttgggga  
TTattaacgcccggTcacacactTcattgtgctcacatcaaacgtaacaaacgaagggtctatgt  
TgggcatcataacacaggggtTTTccatacattcatacatacctctgaattTcatatcTTTgt  
TacatctTgagaaagaaggTcgTtatttagTcacatcctTcttattattacagaaacaggtgatg  
gggtTTTTgtataaaaattcaggatcgTtgcattTaatTTTgaattCCgccaaggaagaagatt  
gacGcaattTggagatgtaagaagagTtgcggaattctgtatgattCCgTattTgtTgtTctT  
taatacatcataatagattggTgtcgaagatgaaggagTggTggTcctTTTgtgggtTgaagga  
TtgaaagcGcaagcagTcatcgatgtTcctCCgaaacctCCgaaatatgtTgggtatttaggtc  
TgcattgCCagccccatcatctgtcagaacgactatagatgtgtgcacagaacactctTtaac  
TcacgTtctccagTggTtggggatgtTtctatgtggTcaccgggCagTtTcctgaccaacaa  
taaggTttaggatctTctccagattTatgtgtgataaatgtTcctccagcaacaaatggTgtca  
TcacacgaactgctctcGaggtataacacacagatgtgcaagTtTgtccctctTtcaaggaac  
TgggtTggaacagTaccCGccagTattgtaggccaaaatatccacatctTcatcatgtcctTct  
gatgtagatggaggaggaggagcgtcaccactTaccgctgatgcactatggTgatggatat  
catgtacaccaaataaagaatcgtacaattcagTatcgtctTTTTctatattatcctTcaaat  
gaccatcctTTTgtctaaactTTTTccccgatacagcatctagatattTgttagattTTTTcgatg  
gtggcctcactcaatctatctatatggTgtTcaggcagagaagagatgaggatctattTgcag  
ctaaatcatgactTtCGaaccgagaattcctTtctTcgTtTctgacggaacgtTccattTatt  
ccctTtaacagTcaaattcatcatgtccaggagagcggggTgaggtgggTaatTgctTgcactc  
TccaccccgTcatgcctacctctggctTctaggtattctTctagTgtctTTTTcagggttagctc  
ctTgaactgctTtcaattTactTTTcatccctaattcgtgtatagctTgaaaattaacagacat  
TggTtTggctacattataggccattTgcagcgcagactagcGcaaaaatacagcctaacacgaac  
acggTcacgaataacgtTattTgCGcggTgaagcgcatactTcggTtggtagggTaaagTaaacg  
gatctctTcgTcgTtcatccatcgTtTcctgatattacaatggatatctTcctagataaatctca  
TacaggtGCCaccctTTtagggTctTataagacgcagactgtgaaaaataattctacgtTaaaa  
aagctTaaaatgggCGcgcctaccaacgctgattTtacacgcacggTatcaggagtagctTctT  
ctctctatctTgTtaacctggagctcctTccgatagagaaaagTtagTtTtggcctctTctTta  
TtctgactctTTTgtgtacaactacaaggatgcagTggTgaccgctgaggctCCcaagTggTgt  
ccctTtaacgagccagctctTcatgagcacatcatgaacagactTgaaaaagctggTctaatta  
acagatctcgTtTtTgtgtgtaaccctgtTaaatcggctggagaagTatgcggattTcgctattc  
TggaggaagTactcccagaactTaatTTTccgattggagcatcagagataaattggTtggTc  
atacttagaaatgctgctcgTtTtTggTacagTggcagcatcggccaagacgccatcgaacgca  
TtctgatctaagagaaggTggTacaagTaaacatgtggcaagaatgcaatgaggagactTcg  
TgtatggcGagcctTtaactggatagcGgaagcctccagatcagcgggcatgatTcgctacgaa  
ccctTTTcggTtggctgtgctctatacgatcacgaggtAagaagaaggcaactaaaaggaagTt  
atgagcGaaatgtactattTctTggTgaccattTctgTaaagaatcaactctTctggctgatat

ttcaagagggggaagaagttctgatttctggacgatcgttgaagctgtcatccgggtacaagaat  
agacatgctcgaacaatcagtaatgaaactaatgccatccctgaagactcttctataaacttgg  
agtgggaggatgttctagtaaaaaaccaacgcgacacaaatcaaggagatgattctacgttaga  
aaagaccttagaagctgccatcaaagaacatgaaagcataggagaaaaaaggaaaaaacatatac  
ctagagtttattaaaacatgtctaacagaggagcaacgagaaatgatttttaagggagttggag  
gaaaaggggaatttgtccccggcccatctaacaatctggccgatgcgatactggctaataatgc  
caaagcaggcatatgggttattatgcagagtcttttaagcaaatcaatttcttatactccat  
ttaatagggtagcaagctcaacgacttttaatgttcaagttgtatatgcctgcattacttgc  
ttttatatactcagaggggaattgggtgacgtgtttctgaatgggtgtgtttaacctagaagtga  
gaaagaaagagctgcaaatgcaaaaataagagacatggtttctcgagacgcctacaagaacaat  
actaacgagtctaataatttgggcaattattccaattcgatatcgctacaatttatggtcaaa  
tgtctgattgtaatgcaattcctctatctattaatattggagtagctctccataaatcgaggat  
gaacatgcaagacattgaaaagaccatacaacacatagtggtatgggtttggcaagatacgt  
gtagcggaaagaaatagagtagctagacgtcttttacatagaagaaaaatgcaagaaaaggcag  
ccagggagcagcagctgagagacagagaagactaagaggtgaagaagaagaagaagaagagga  
ggaggaggaagagggagaagaaatggaagaagaggaagaagaagctggaacatcaggtgtaat  
ggttctggttatgatcaagaagaagaagatgatggtgaggaggaggaggaagaggaagaag  
aggatgaagaagatagtgaggggaagatataatggggaaaataactcaagaaaacgtaaaaa  
cactggtataacttctcactcaacaacctccccaaaagcgtcagcagggtaaaaatgcgccc  
atccaaccaagggaaaaagggttaaaggaaagagataatattggaggatttttattagccacaa  
ttcaaaacgatgaccgccaagtgaatgtggagagcatacaaaaacttttgacggccaggcaaa  
aaaatattgtaaaagggtggaagaaatgtggagataatggactaccagaattgtaattgaaaagg  
tcaaatctactagattcagtggtccatttcagaaaggggtctattcttaacagcatacacgcaa  
ataggggatcagaaactggcgtatacaccacaaaggcaactgtatttgtgattactatgaaag  
aaacgtatcaaaagacagtagtaataatacaccattcatctgaatgtattgagcgggcaaga  
gaaagggatgcttctgtgccaatctaacaacgcccttgtcctgtagactctaacaacctg  
aagatgtggaacaacgtatgcgggaattgatcatggaccctccttcattatcaggggtagaaga  
ttctctcgctatcgaaagagtacttcaaaatgagatattattcacaagtcttgtcaccaatcca  
attttcaatgccgtgtaggtgctgaaaaggagatcttggagatttatcgattaaataaca  
ttgtaaaatattatgaatatgactattgcttgtctagtgacggagatatgcctatgcttctaga  
ctcaagaggcaagacaaaaaccttctagaaaagggtacagtgaaaaacacgagaaaaattttct  
aaaccaaataatgactgcagcagaattgaacgtggccactgctcaatctgcaggacaccaataca  
tgaacgctggtcattgtccagaacctggaatcaagcaaatgttactcctgattgtataatgaa  
actgaaatccatcgccatggaaaagggtcgaggaggagatcggcccttcacagacagaaatgt  
gaccatgcttttgcaagatgctgaagtgtttattcttcaatattgacccttcaaatgctgcag  
atacatttattgaccctgctcagtgccaccttatttaggcttgatgatctttgtagggatag  
gaaaaatacaagaacattgactgggttaaaggatttactagacctgtaatgaagggaaacaat  
aatgggtgggaactggagaatacactaacattggacgtgactcaaacgtggccgcccctgttg  
atttttacacaattttgaaatacacaatgattgatgatggtgtaataagtgttccttcacggaa  
accaaatacagctgattacagtactattgaaagagcggatgacttactcaccgagagcaggac  
gcttcatgtgaaagctaccgcccaccttgtttgacgccagagcgggtgttggaagtcaacggag  
acggacgtgtcccttacccttcagtgaaaccgtagaagacttgggaggagaagaagaagaaga  
ggaataacagggcgttattgacgacagtactgaaatagaagacgttcaagtacaggacagtaat  
ctattcgatgtggaattattcgatatccctgaaatagaacaacatcaacaggggtggagaagaag

aggaaacttccttcagcaatatctgaagtgtttgcttcattaccagctgataacgattcctcctc  
acccgcgcataattccctcatttgggaattctgaggagggggaaaaaagtccagaaccgtacaat  
atTTTTgattctgcccctcgaccaattattggatttaatagatagcgatggaagaaacaataacc  
ctaaaagagtcgactggaacagtggtcaccattcaagaatgaaaatattaccagaatagcgtcta  
attacgtccgagcctttactgacacgtggtctcatttgggtcaacatttctggagctcctctaac  
tgctgagaagaatccaagcgtatcccagctaacgaactgaatagatactggaccaaactaac  
gtgttatgcaaccactctttaaattggaggaccacataacgagggatgaagatactggtacaa  
taacactaaaattcaaaatgtatatagatgataaaaatggactatatcagtctgcccgtttta  
gctggctctcgattcgttcgtttcgttgcattcttttcccattggagctgatttagtttccaat  
aaaagtgaaaacaattctgcgtaaaaattccccacgacactcgcgctgaatctttactgaata  
atgttggattccccgctggattaagtggccttttaagagatggagcattaactacaaggctgc  
aaacttgagcggtaaaagcggatagatggcctttcaggttccatggtgacagtaactaaaaat  
aacaccaataaaaagagcaactgatattttacatttgggtgaataatgtttctgcctctgcacaac  
aacttgacgattctgaaatgtctcgtacttttaaccacaaaagaaagtggagtttggtatga  
tataaatgtgtccagttcaaggcaagtgaaccagcgtaatctactccaccatcagaatataata  
ggacaacatctgatcgaatttagaaccaagcaacttgaacgcgcacaaaataaaaaagtcaagg  
aagaggaaaatggtgagcatgaagaaatgacaagtgaggaggaagaagagggaagatgaatatga  
agaaggaggttgcttatcagatattgacgaggaagatttctatgaggatggttacgatgaagaa  
gagggcgatgacaatagaactagaagaagaagaaaatggaagaagatgaagaggatgaagaag  
aagaatatgacgatgaagaagatgaagaagaggcagaaacttgtggtgctaattggtgttattga  
ttgtgaagacgatgcaatcattttcccattggacaaaattcaaaaaggaagaaaatggtaaa  
aaaacaaacattaaaaagcgggtcacggaggaagggggagtgcctctgctaacactttatcctttg  
tggaaaaatacgttggaattgtaagagcctaggtataaagccagtaggggtgtccgccccatc  
cactgaatttacttccctatttatgaaggggagtgaagctgacagctgttataataacttgtcag  
tccaccagaggggctagccgtataaggtcactactcaataaatactctgttaaagatttgatgc  
aggtaaacagcccttcgagttggaatgggctaaccctcccagaccgaggttcgtgctgtttga  
taagaaaactaaggaagaagttagggttaagtttgaaattgaatgtgaaaaatccgagatattt  
gatgtcgtatctgaaactccctagtaataataaagtatgggttaaagagacggcaaaaataata  
aacatttggctctgattgaagactttcttccagctatgggtgctgctacccccaaaaattcccct  
caatttgattaaaactatgacgagcattttctctgttagagatattggttgatttaaaatacca  
gaagaagtgtcagttttattcctatagaatggaagacatctatttctgcaatggggctcctct  
ctgtacaatttgatcgtataatagaagtgatagatttaataatgataactaatggcgcctttgcgac  
gtcatgcttgaacaacgcattcttcttggaaagaggagtgggtgccagagatgggagtaacacg  
tggctccacacggaccttgtgcaactctccacctccatatttagaagatctcgcaacagaggag  
tgaatattggcggtaacaacaactggttagcaattcttcttagttcttcttgtggaggaataa  
ggcgattatggagtacgttgtggattgagtataagcaagcgtgggtataaccctgaaaccacca  
cctgcagcgatgactaattcttcttcccgtcatcctcggccatgatctcattgcctcagccca  
cgcgccagagcatagatctttcgataacgacaatcatccaagatttctcagaagtttctgggaa  
attgaggcttaattggattacagaaaaacatgtctgacaagagcaaagacgtgtttaaattgatgca  
atatacagactctggcgcattcaaggcgtcctaacatgcacagtcacgataaaaagttagacgta  
aaaggaaaagaaggactttattggcatctggagaggggtgtggtacgaagaaacctgatggtgag  
tcagggcaatgacgtcaatgatgccaccagttccaggaagaatgcggaataaaaattgggggc  
ggggcttctaggggtgataaaaagagcccagcggcggaggttcggcagtcagttccagaagaagag  
taaggaacaaaccccagtttactatagcagttctctgacgaagacgacgactgcaagaagaagg

cgacttttcttccgagttaaatccaacgcactctcaactacttctattccaacaacggcaaca  
gatagctgcacagaagacgacgacggttttagtgtctgtagaagaatataacaacagagtaagcg  
gttcttccaccacagccggagacagagttcttgcaaaggatcttctctactgtatctccgaa  
cgaaaagaggaactctgcccgcctcgcgcactcaccatatcccggcactctcttttcaacgct  
ctatctgcaaaaacaagttgggagaaaatggacgtttcttctataagagcactattgactac  
cacaacattgaagatatggacgatctccagcgcgccacctacaaggatcgatggagacggaat  
tggcctcgagatggctaagaaggagggaaggtacgtccgatcgttggccaccatggacgaatt  
ggaggtacctgaagaaccagccacttgctacacttgcggtacacctttattagacgcagggca  
ccccacaaaacgcaagtcaatattcagagagccttgcgcttaccagaactctccccgatg  
caccatcccccgctccgtttagaagagcttgctgcacgtgccagaaggagcaggtttttcaccta  
ccctccctacgacgacggatcttctacatcgtcttcacaagccgaatgtgaagatgattatcct  
ccaccatacgacccatcagaaaatccacagaggtcccagtggtgattattgtaccacacgctc  
aagtcctcagttctatgacggatcacgccagggccaacctcataaaaaatctgaagaggggagaa  
gaaggccctgggtcttggcgtcgcaacaacttttagctactagggttgtaacaagaagaaaatag  
gattgattgtatcgatgacgaactttgcatgtttttgaccattcttttgcttgctgagtgtaca  
tagctttatatttgccaataaaacagaccccgaatgtatttttggtgattctttattactgcct  
atttttatggtttaacggaaaaatttttgaaaagtttttgagatggagatgaagggaaaaaga  
ggcgctagttcatatactgcccaataggtggcgggtccagaaacgtctgtctgttccagaaa  
tgtgttttagagatttctggacaagtcatttctggaaaggggtgtaatttattatagttggtata  
ttatttctggtatataatttctagcccctctctgtaatctgacgttgggtcgaccagcgggtcca  
cccttcgaacttgacataaggccttagtcagcgggtccaccccctaaactggagtgagctgaaaa  
ttttgaaaagtttttgagatggagatgaagggtaaaaggctagtaatagaaggttggtgtaact  
cggcataaccagaaacatatacaaaagggtggaaacaactattctttttatacagtagttt  
tattgtacaaaaactcagaaatctcatcacatgacaaatctgaatgtcccatccgtggccct  
caataacgtacgacactggacctgggaactcccacctacatgttttacatacagaaaattttgg  
cttagatgcattatcaacaacacttttaccacattggcattcattctcttcagtttgctcacac  
atccacaagaggccatattctccatagaatcagatccatcaacaaatataatagaatgttacac  
ccttgctgatccagtcctatggcgacaatagtaaagtcctgtccaaaaacactgtttccgaagat  
ttctttgtcccatccatgtattgggaaaaagtacagtatgggtccacagtccttgatctcctcc  
aaccagtcgttcaaaaaatccctaataaagaaagacaggcaattcgacttgatctggaaaccaa  
tggtgagtttcttcgtattttcttcattggttgagggggaagaaatcgcgaattgtgtatctgc  
ttcaaatgctccacacttccctttatggatcaggcgggtctccataatctccttgccagaattg  
gggagtaggccttcgaagaacaggatattggggcgggttaggaactttgccagtcgaatccatgt  
tggcaaagagatcagcaggggtcttcaaagactgaggccatttttttggttggtgctgctgagag  
aggagcaagtagtagtggttactagcaaggagctcacagtcctatataatagactaaccccc  
cccccaaaaattctccacatctttcataccggggctcggctagaaccagaaacggtttgact  
cacatctggtacattatttctgttatacatttctagccccttcgtgtaatctgacattgggtcg  
accagcgggtccacccttcgaacttgacattcgatcgactcagcgggtccatcccctaaactgga  
gtgaccagaaaaatttttgaaaagtttttgagatgaagatgaagggggaaaaggggttagtgaa  
tacaggcagttctgccttgctccagaaatgattctaaagatttctgtgcattatttctggtata  
catttctagccccttcgtgtaatctgacattggggccgaccagcgggtccaccctcggaacttga  
cattcgatcgactcagcgggtccaccccctaaactggagtgaccagaaaaatttttgaaaagtt  
tttgagatgaagatgaagggggaaaaagaggggtgctagggtgcgctccagacatctctagagtg  
gctagagcccagaaacatccaactagtttctgggacattttttctcccactgacgcagactat

ataagctaaccactaagcatatthttgcacacatttccatccaccatcactgccgaatacactctt  
gtgttgctccgcatagcctaacaatggccccaaactccttcagaaatttgctccagttatcaa  
gactgagaagaaggaagaagaaagggatgaacatgacgaccctttacggcagattgattttaga  
gatagaaagacattaatctgcctcactgcaaaactgtgtttcgaggaagagaaaagctggatctg  
cacatgatcgagtatacaaagtactacgctacgggaaccatacaagtaccgtcgccccaatag  
aacacatcgaggattggccctctcaatggatcaaggtgaagtaggaacatgcctccctctgca  
cccatggaagagactgaagaaaaccccatcgacaagtgcggagtgggcgttccctgtactccaact  
acaatgaaggcgatggcatgaccacctttacaacgacgaagagtataaaagaagtgcaaac  
aattgaaggaggaacaagaacgtgggtaagaagaaccgccaagaatacttcagacaagctcta  
gagacattgatgatgtcccattctataaaacaatattccaattttattttttcaaggaggata  
tggaggaaggatttgtgcacaaactccacacatttattaatatgggtacaccctaaaaaggtgtc  
tgttttgtgatataataaagattgatgtttttataaatgaaacgtatttttataccaaaaaat  
ttattatgatgtatthtcattgggatggcttttctcactaccaatctggcctatgtgtgtgttcat  
gctagccctctttcacccttcatctccatctcaaaaatttttagaaaatttttctgggtcgct  
cgagtttagaggggtggaccgctgggtcggcctaagtcaagttccgaggggtggaccgctgggtc  
gaccaatgtcagattacagagaggggtctagaaatagtaccagaaatagtgtaccagttataa  
gaaaatgtgaccctttccagaaatggcttgtccagaaatctttgaaccatttctggaacagac  
gtttctggagcatggctgaccagatatctgttggcggctgtcaatagtagcctatgtattcaa  
tggctttttaccctcttctccatctcaaaaatttttagaaaatttttctgggtcgctcgagttt  
agaggggtggaccgctggctcggcctaagtcaagttccgaggggtggaccgctgggtcgacccaa  
tgtcagattacagagaggggtctagaaatagtaccagaaatagtgtaccagttataagaaaatg  
tgaccctttccagaaatggcttgtccagaaatctttgaaccatttctggaacagacgtttctg  
gagcatggctcggcccaggcagcctcacagttacctgttcacacccttctactagcaccctctt  
tcacccttcatctccatctcaaaaatttttaaaaaatttttctggctcactcgagtttagaggg  
tggaccgctggctcggcctaagtcaagttcgaaggggtggaccgctgggttagggcccatgtcag  
attacagagaggggtctagaaatgtataccagaaatagtgtccgattatataaaaaatttaactttt  
caacatgtggcatacaccgatgaacgtatagccaaatagtaccacagtcaaaacatttaggt  
gagaaagataatacacatgtataaatttcaatactttattttgcatacataataaaaaatcata  
cagtttcggactcatctgtccacacatcatttattaggaactggatctattataccctattct  
tctacgtttacaagatacttgttcatcaggcactgccattcttttacaagacactattggttca  
accaacatctctttaacttgatcagcgtcaggtcttagggaagtagcttctctgcatacaggac  
accgggtaattttctccagttgcgtactcaacaccaatctgtcccaacatttttcatcaataca  
atgtccacagcgtgtcgtcctgatgatattgggtactactgaaatcttctaaacacactggacaa  
ttatcgctgtcgaaacgcacattagcattcttctcatgttcttctagagcccttttaatttctt  
ccttatccccagaaattatgtgttcagcccaaggataatttgaggatgcaatataccccaagcg  
acaattcagatattggccaagaacgaggtgctttattgacatcgagaccggtggcagcaacaagg  
ggttcttcttcttggagagagaaatctaaagcagctttcaatatgggtgggtatactaggctcgt  
atcctctctgggcaaacgtgtgtaatgcggtatcattgaacatcaataatgctgcttcagttac  
actaaagtagtagatttaccatacaacatattaatctttgccccatgggtccaactagtgca  
tcagagacatcggtttgtgattggcgatggcaatcattaggggctgtgcaccatcgctcgccc  
ttctagcattcactatacttctatcgaaatcgatataattatattcttgtatttttttagcaagagc  
atcaagaaaattgcacgaggttgcaacagctgcagcatggaatacgttttctatttttatta  
ataaaggaaaaggccaagctgtttgttggtagaatttcaatacctactcttgtggtaaggggg  
aagatattgcagcgcgcaaacatttagaggtgacatgcctttcgcagaaggcttcagaatgttaag

tttttcttgtttgactagtttgctagtatgggaatatttgttaatgatacaataacacaataga  
gtattccccttttcatcaaaaataagtgtgtttgagccacggattcttggttaagaaaagcttcaa  
gatcttccatgaaacacgagacttttacacacaatctaacatagcctttaacttcatgagggtc  
tgttatcacaacgtttttatgtgatacgccttttcacaataagattatcgcacagtttgctg  
gtcttttttcttaccataatctccctcaaacagatcttgaagtaattgtaatcaatctcttcaa  
agggcctactgttaatcatccacaacagattgaccacacaaaccactaccactgcttcggt  
tattgcaacattttttagaatattgtccatcatttcggcagagaattttggcatcgtgtcaa  
atactgtaaagggtttgaaaatgctggattgtttcagccttctctataaacacatcaaaaact  
ctactgccatttcagcaacagtttttgtagtagtctcacagtactcttctaccatttcttctc  
tatcgaggaaagaaaagacttgataatcacactcctgtaagcactagccctttcttcgttggc  
caattcaatctagctatagatctagcgtccatgttcatttcttctctgaagtcagttgacacgg  
atgatggtgatgtttctaggcaagaaaaggctctcccgataataaaaattgccattggatcag  
tcgttttgcctttgtaacacaaggagattcgtccacaaaatacttgtatccgaaagatatgtca  
aaaggttcaagtggtgcagattttttcatttcagccacgtaatcagaggtgatattgacgattc  
ttgaaaagagcctgaatctaataacactcgaacatttttcaacgtagaaaacaataccacttct  
tgcagaactagtagactttttcaggctagccaaaacaccgtccaacttcttgatccttctcata  
accttctctctttcttccctcagcctgttccctttgaagtaaacttgaatccagttctgctgtcat  
caccagtgccaaacttgatgccgtgcgtctcgcgtctcaaaaatccattatccatagagaccag  
aagagaatattttacgaacaaaaagtcgtcgtggatgttttcgtaaaggcctctgaaggtttg  
cagacggttgatcaatgcgttgataaaagtcattccctcgcagatgggggaagaatcagacttg  
tattgttggtgataaagaagtagataatatctctaaactcttctttattgtctaatttcttgaa  
actacttgaaggaacaggaggagaatcttgaggagtaattatgtcattcagaagggccaattcc  
cttctgtgaaaacgtccagaaatgacataataggttcaatgttttcaagtaacttcttcaagca  
cctgacggtatcgtggagctgcttcagccatgttgatgatgtctcacatacgcactgttgagtt  
atccatgcgtacgcccgttttatacaaaagatcccgtgtaagaaactccctccggttcagttca  
ggataggggtgtgtcccagttttacatccaaagttaatatatttttttaatacaaaaaaat  
cgtaccgcttattggctgtataaaagagggagcacctgctcacttggacatcattaacctca  
tcaatatggagggagaacatcaatatttgaacctagtcagggagatcctagaagaggagtga  
gaaggacgatagaactggaacaggaactctatccatttttggaccccaatgaggttctctct  
cgagacgacactattccagttctcactaccaagaaaattttctggagaggagttgtggaagaac  
tcttggtggttcatcaggggcaatacagacgccaaagaattggccaagaagaatatacacatctg  
gaacgctaattgggtcgcgggaatttttggacagtagaggggttatacgatagagcagaggggat  
ttgggaccctgatacggattccaatggcgtcattttggtgctgaatatgatacctgttcttccg  
attatactggaaagggattgatcaattggccaatataactaaagaccctgagagaaaatccaga  
tgatagaaggatgattatgacggcatggaatcctatggatcttcacctatggctcttccctca  
tgccacatgactgctcaattttatgtggctaattggagaattgtcgtgccagttgtatcagcgaa  
gcgagatgtcgggttgggctgcccctcaatattgcatcatactctcttctgactcatctgat  
ggccagtatgggtgggtctaaaaccgggagagtttatcctcactcttggtgacgcacacatttat  
aataccacattgaggtgttaaagaagcagttgtgccgcgtccctagaccattccctaagttga  
ggattttaatggctccagaaaaaattgaggactttactatcgacatgttttatcttgaggggta  
tcaaccacacagtggaacttgcagatgaaaatggctgtttgaaatcatgttaaggaatttccct  
gttactcattttattcctagaaatgggtgtaatcgctgttggtggcgagcatatttgtgtatata  
agagcccgtgttagctcctcgattcagtcacaagagcgcacacacacgccttataactagctctc  
tctctccactcaagatggcctttaattttgaagactctacaaatctcttttgccaatatggactt

gacggctggcacaacaacagaccctacccgccccaatatcatattctttgaaagtctactcccc  
aactctggtattgaggtgatgaagaggcgtctcgtacggcaaggaaagtgtgggaattttgaag  
caagtggaggtgctatgtcgtatcttggtcgaagataatgcagaagatatggagaatctcaa  
cagtgggtcccatgtcaagacaaactgcttggcattatccttcaagagtttatcagcaactgg  
attgaagagactgatcgacatggacagtactgtacttttccccaatatcatggacgggtgggatg  
gttcacgtgggggatattttacttcgctagccatgaaatggatggctagggatgtgactttctt  
tgtgtttgttgataggaataatactgtagaaaatgcggcatccatgatggatgtacaaaaacta  
ctagcaattgggtgcaaaggtagtaaaggtgattgttgacaatgcatcaaaccatgttttctg  
tatgtaatgcgtgtaggtgcaagtacccaggcccagtgctacatcgttattgaaggccatggagt  
gggtcattctgatttgacatgtgatgagatttctggattctttgtataataaaaccccataaga  
aacaataatcttttttattcaacacccatgatttttagttttatagtatataaaatcaagaata  
aagtatgtagatatctacttttcgatagctccttcacctatagaggaggtggataaaaacag  
aagatatggattctaatacttctattttaccgccaagcaaacggccagggttaaactctgttaca  
ggttttagggtataataacggtagcattaatagcttccgtttcatcctttatattttatagg  
gtaggtaaacgcaaataattacccttcttcatcctcctcctcagaattatctgatgtagataatg  
ggtagaaggaggaggaggaacaacaacgacaccaactcaaccttcacctgacgggtggagatgg  
atacgtagatctttctcctcaaaagaaggctgaactaagaactagagttgcaaacgtcatctt  
caagaagtgtcaaaggatcaaggagtggccttttagacgggcaatgaatgattcaactgataaga  
taatggaagaaactgaggcgagaatcaataacttttcagagccattcagagaagcaaccgtaga  
acgtgaagtgtttaaggatgacacagacaaaaactttatcctttcaactctagatttaacagag  
gaacaatttaaggacattgttatggctgaagtgaaaaatcaattagaaaattttgactatgaag  
acatgaccctctcatctttgataacatcccagagactgattatttatggacaactcatttcga  
tccgaaaaaataatgacacgtactctgaaaaggtattagggttctcagatataaatagtatagaa  
agaatctcctctacattttataaaggtaaaaaatgatgaggtaactactggaaatgtagctgtcc  
tcgttgattttgaatctgaacaataaaagagaaggcaggaaatagtctcatccgtaatgtcga  
gtttattgttggtggacgaacagacctacaaatctttcttccctgcattcaatcaagttttctt  
tcctttaaagtaataaggagaaaagggaagttactgtatccatcaataatggatgtgtaggta  
tagtggccaatattactcctctaactacgccagttggagcagcttccggacactacatctatgg  
cactagcacagcaaaggaaaagacctatctatgtaatagacaagtacgataccactgaattt  
gtttgtggtctgagtaacaagtcaactcctctcatggctctaaatattctctttatgagtgata  
ctgttttcccttcatttgacgaagcagaaagacctctgacggatgccaaaggcagtagaaatttt  
aggtaaaagactaggtgtaggaagatacacaacgccaacatcagaaatactcagtgagatgga  
aggggttattttggataagatagaacaattgcaaaaaggcctctcctagttatgggtctatt  
gatgtgggtacggctattttgccgtcaattcatggaaaaataggggtaaaataaatgaag  
aaaccacaatggagaagattatgggcacaaaggaagaaagagaggacactataagaagtatagt  
ggctaattgttatcaaagagaatactgttaaagaaaatgtaaccgaaaaaattagagcaatgaca  
gataaggaattaatgacaatagggaatttatgcatgattttggaaaaatttcaactggagatg  
gaggaaccttccatctctttgaagatacaccgggttttgaaagtgctttaaggcagaatataa  
aaacgttccaggagcaactactccaaaatacgtatctatgaacagtttacgtatcgatgcgatt  
aatggaaaaatcgaagaggtttataatccttcacctatcatgggtattagagaatacggcacca  
ttcgcaggggcaggtacgaagaaaatgcaggttcgaaagaattggtttttatgaccaagattga  
aaaaagacccaataatgtagctgaaaatctcattattagagttgccaaccagcagtataatggt  
atgaggatgggtgtttttatagactacgaacaaagaaggggggtgtccaaggaggaaatgttta  
taccatataatgttcagaaaaacaaggctcttaaaggcgtagtacttacttttcattcgttaag

gaaaattcctgatgaaccagaagggagtatcataatacacgcactagggttttattgaggaaat  
aataataataataataatggcattacaggaaaaggatataactatagggaatgtttctgct  
gccctacgagagttgatgtactcaccacacatatgcagcatcacgataagctaaacacattcc  
tggacagaaatggtgaatcatcttcagaagagaaaaataagacaaattgtggataaaaatcgatc  
caaacaacatctgacatatctgaaacagtcaataatgtcacaactaatgggactgcattttcc  
cttttcgaagataccttagaaggtatggtgaaaaaaaaatataaggtgataacctcagagtgggg  
actttattgatggccgtaaaaagctcaatgacatgaagagtctagctactggagccatcttatc  
tagacagcgagattttgttgagaaagtataacaggaacaaaggactggctcaaggctataatg  
ggtgtggtattataaggtatactgtatttgtcaataaccttgcaagatcaacactcgataatg  
atgatgacaaggcagcaacctattataacaccttatataatggcgggtattgtaaaatggctat  
aaaggactatgaaataccagattcgtacagcaaggctcgaagcggaacatacagttgaaggaaga  
aagatgacctttaataataaaaatggagagggcgataccataaacaacctaataacaatcatccct  
cagtgacaggttatcttgcttccatctctgaagacgcagatgtgacaggcgccattacttttaa  
ctgcaacaactgttttatagaggcagatatgagtagcctctacatggatgagaaaaaacagag  
gcatcatttaccctcaacttaccggaaatcgaaggagctgatgcgaatgcagtctatgaaatat  
gtatagtagtagtttgatggaggacaaataaaaaattggatacatttcatgtagttttattdaa  
ctcttaatcttatatacatttcatgtacatttcattaaaaatcactatcagagctatagtacag  
aaactgggtgctggagctgattaatcctcctggccatgacggcagatgtcctccgtgaagtgttg  
cgtctgccgtctctgacctatcaaccatcctacctgaacctgggttcaaattaacatttggtg  
catcaaaggggggtgtgaagaggtgaagaataaggagaaggtacaggactagcatcatagtcct  
cacaatccttgttcttccccttctaacaggtgtggatgcggggagggggcatattagccgtgtct  
agcaactccaacatctgtgacctggtattcaagtgcgttagacacaaacctctcagtgcttctctg  
cttcattgtcattattaggaataacaccataatcttccatgagggcgctcacgccttccctgctg  
atgcctctcaaagagccgttttcttccctcagggctcatcagagaagagtttgtgaaccagcat  
ggtttcttagcctcccctacagccaagtcaggcacaaaaactggcttattttttacattcttat  
agggagaagagggggcaacaccttgacaggagcaggagtggggggtaaggagtggtatattc  
accttatatgaactaggtttatggaactcctggcaaggatattttgacctccctgtcctctttt  
agagggggcggccttacagcctccaaaaaccttcttagctattttagtatgcattttctcaatc  
tttccataccttcagacaacatcatgaaccttcttatcaaactgaaaacctcaagaaaa  
cttataaaaggacttttcttcttgcaagaagacatcccgccattagcctaattgcactcaa  
acatcccctatctccccttcccatactttatctcaggaacctattgagtgtgagcagggtac  
tttctatagatgctctcagagcatcattttccaaggtgatgagctataatcaaccttcttaca  
gctggcacacttcttaaccatatacctttatcttcttcttcttatgtttcttcatcatttct  
gatgaagaggaagttttgattgatgtcttaagacgatattcttcccttttattgtcttctcct  
tcttgctgacgataccctcccttcttgctgctgctgctgcccgtgctgctgctgctgatgat  
gtcagttccggccatttttaataactctaaaaaacaagggggtaacacatgtaataaaatgcat  
tataatgtaacattcttttattttaataaaaggcagtagaaaatttgtacatcatttacaggca  
ggcatatacaaaaacacatcactttatagattgggcagggaagatatttgatcagcttccgaag  
ggtcagtatcaaaccattcaacaatgaactgtgtacatgtgcaatttcgtcatccaacctagc  
attattagaggctgacttaatgagacaggaaccaattagctgcttattagcactccactttgaa  
gcgtacttacgcttcaccttcaatttcttagagcaciaaactcttaccattacatcattgacag  
ttgtatggaacaggttacctctagatatacaatctccaagcttattctcagtttccctgtctcct  
ttctctaagagcagaaagttcagccagatacctattggcaatctcattatactcctcatcaata  
ttatcgagtctacacatatacctcttgacatctacacacagttcttactctcagaggaatat



tagacatcctgtcctcgtcacgcccataccttggcctctttctactgttactactactactact  
acttcctgaggaagtagagggctgattcactgatgacgaagaaggtattacttcttcgcatca  
gagtctgaatcaacattaaaacaaaggttaacattaatgttaagagaggttgaggtagggggcgg  
atgaggtagggggcggatgacgtagaagcactaggcatattcaagtcaggcaaagacattgtgtc  
atcatcatcatcatcattaacatcataaagtgaactactaataccactaatagtatcaaag  
gtaatattgttacttctaggggggaacagtcagtcaggaagtgactctgagtcattatcat  
ctacctctggggggacaaactacagtatcctcatcatcttcaatgaaattgaaggatgtcac  
accagacaacaaactaggggagacattattatcaccttcatcatcatcatcattactcaag  
cattgagtaatgtcaatagtagttgggagctacatacttaagccattcaccttcatattcataag  
gggggatatccttgaatttaccattaaagctgcctcatgattatcttcaaaggtctcttact  
gaatgcatgcatttcctgtctagatagagtttcaagcatgaaactcaacttggataagccctc  
tccatataaacatcctcattctcattaacaccttggcattggggacaaagaaagtaggtgcta  
gaatagttgacatcttattaagggatcctttacaccttcatcattaacatagtcagcagacaa  
caaaaatgagtgaaaagaggcacttctgtacacctcttcatacactttacggaagaaccacaca  
gggggtatatagggcctacacatgggacataacaggtgattttcattcacatagctcttcaa  
atctccaggtgaaaagacactccaggtggacacttttctgcaacacggcatccctcatttga  
ccagttatagcaatccgtgtccgaatcgtaatcccatacagatgggacaggtaggcacctca  
tcaacggcgacggtttcagccatcttggtgtgtgtgtgtgtttactttaagaggggagaaaagcc  
aacgctatagcaactcatttcttactttaaacaggttcattacagtccccttaaagggaata  
tgtgcttcatggcaagggcatattctgtgattgaagggcgattttgatagaaatcagtgctctgt  
tccgctttgcaacaacatcaaaaagtgcatggttgacatcaaattaaaggcagggccttccatg  
ttagaacaagcaacaacatcttccagtatactggaagccattacactgaaactgtacgtcattg  
aataggcacctagacagtgctccctaaagaactcgggaggtgtgtgaaatgtactgcctgattag  
ttcttccgtgttcttaaatattcatcgttgtaacaataacctagagggatgagagtcccaag  
tcaatcatttttaggttggccagatatgctatctataacaaagttatcagcctttatatcgacat  
taataattccctcatttgcaactcttgtaattacattacaagtctcagccaaaacaaaaggcat  
gttcacctttagtttttcaaacatacttcttacaaccttccgggcaatgaaagagtctgttatt  
ggtgcgactgtatcaaccccccttacctctggtaaacgtcccaccttgaagcatgacaacc  
catacaacaagcgtgcgtcccttgactcataaactcccaccatctaaactatccttgacaca  
cctaatgacatcatcaatactgatacctgcaaatggcatctctaaacataacccctgaggacac  
acaccagtcaccccaactaccccttaatatctttctgtatacagaaagggcattaacacact  
caaaaacaaactcttcatagttcatatccttcataaacttgacaacagtcaccttattcacaat  
gtaatagaccccatatttaatctcaaaaaaggctctccagggacagatgaaagtgttaaagtcc  
ttcacatcttcaggcacttcgaccaaactcagacaacaaccacgagcagtccttacggaagttt  
cccagttctcacactggtcagaaacttcttaattagcgtgctagtcttttgtctaatcgcctc  
acaggcacttgaaggcaattggaacacctctacagccatatacattatgtccataatctggggag  
gacggaatattacgactagacaactccttaagaatgtgtctagtgtcaaaaaatctcatctct  
catcgcaagaagaggtgggccaatagaagccaactttagggtcctttccatagaaacaggtatc  
atggacatacttgctagacttaacaattgacctatggccaattctcaactggtgacaggtatca  
taattgtcctcaagactacaactcttctcaatgcctttaaagtagtaaggggaatcacgttcaa  
tccactcattatactgcctcttacctgcctaatcaccttggacgcacacagtttgaaaaggt  
gagtagtgaggagagggagcaactcagacttcttgaaacgtttagggggagggggcgctg  
atgctaaggttgatgacgtcatcccaagtcttgatagtgatggtgtgtgtgtgtgtgtgtaag  
cgggaacagttgtggcttcggaggttgaaccagacgcgtagttgtgtgtgttatattcttccac

aggccgttttttattcccctgatggtaaacatactgctggtggtggtggttctccaccagtattg  
atggtagtagtaattacagtggtccccccattgcctatggaagaaacaacaacaatacacga  
ttaattcaacgcccggcacactaataaagtgatgtgtttttatataaaaaatagcccataata  
tttaacgttacgttaatcaaaaaaaaaacaacaataatagtatattattggtacttacttttg  
atgggtttggagcggagactgaagtaaattccagaaaacaacagttttactggtgggcactacac  
tgcactggtgacgtagtagtagaagtagtagtggtaatagtcactattgtcactgcactgcac  
tagtagtagtagtagtagtaagagcgttggataagctcgggttggctgctagagctggagc  
tggaactggagcttgtatgcttggctgtgcctctgctgagactgatgcttctggcctgccccg  
ctcgttatatacaagttgtccccctcaccctccagaaatttgccgctgaacgcccagt  
tctccaacagagtggttccagatctggctacgggttactcctggccataacctgttagggg  
tctaaatccacccccggcactaaatggggaggacctaaagggtgttataacaacatgtaagcgtt  
gggtaagaagatctggatctggatgaccaccttgtccttcttatcctatccttcttgtcc  
cctgtctaccaccacctcaccctatatctctcaccctatctcacctatacccccatctcaccca  
tcacctctatattccccaccttattcactcgtctccagtttcaacacctgttcttgccgagcc  
aaccataaccagatctggaccccagcttcccttttatccctaaccggcaccatttatgcccc  
caggcgttagcgggtgtatataaggcggcggccaggccagaagcatcagttctctgcaagcca  
gcagaagagcaacacaacaagcactctctctccttctacctagaagagacctgccaatactcaa  
gctacaagaatggcctctccagccccggccaccaagtccttacaccatggtggactctaagt  
tacttagttctgaggaactaaaggaactaacttcatacgtctcgaactagctctcgcgggtctga  
tatgaagaacacttgtccatctattcgaggagcacgagaagatcttccaattcatacaaggt  
aagcacaagttctcactatacactttggactttgaaatcttctatggtatgctgaatattttgt  
tggttgaagtgaaaaaatattctaagtccaattcctttactctttgacagaaatctccaaccagt  
acgggagactatggatgtttcacaatggccccgctcactgaacgctgcagccgatctcttgga  
taagggtgatgtccggacctctatctcccgaaggcggccaaactcgtccccggctgcttgtgtt  
ggtgcgaaggttgtgaaggcactggtgagcttttgccagaagaccgcttcaccaccaacattg  
tgatgagagaagttaaagccatggagttccaaggagacgattttaactactctgccttgtgtgc  
aagtatgccccaacgccccgtgactgagaggcagatgttcgcccttatgaagagtgaggacgaa  
gaaatgggagtgctgcaaaccttctctccagctctctgatgacgtcatcaacccttcaagcctcc  
cctctggacaagaagtcgactcatcaacttccgctcaaatttctggatgtttcaaacgtgtg  
gagtttgcttgaagagtgtggtagtggctctaatagtaatagttcccctgtctctaggacagtc  
ttagtttgaccctgtttataatccaagtgttcaagtttttggtgactaaagtgtctaattgtga  
acgtacttaaccagttgtttggacatgttgtttttggatcacttgatgtggctccaagtaataa  
taatagtggtcccatcaactgttgttaacaacaacaacaaccctcgacctctaataatagtaac  
aacatcagtaacaagcgtgttggtagtaataacagtgggcggcgaagatcaaagaaagtta  
cagccacagccaaaaatccctttaataatgtagatggggacaatcatggcatgtttgcccgtgc  
ccctgttgatgttaatttggatgactttgtttttcccccaagttgaaactcttacaagtaagagc  
accatccctaaagaagaggttaaattgtagatgaagatttgagtaaaatgtgccgtaaaactgcc  
ttacccccctagaattcatacctttaatgtgttcatctctgagattaaccctccaaatatga  
ccgttcaatgttttgcaagggatttttgactgcatgggataagtttgtagagggggatactgct  
ggcgttaaacgcttccgtaactatctcactcgtcctcaactatgcctcagccgccagggccg  
tgatgaagcgtcaattaaggggactgtttattataatgacaagtc aaagtttctgttccacga  
taatgttaacctgatctggacaagagctggggtaacaagaatgggaagaaacctagactccca  
gctaacttgatggcattcatgggtattgacattgtaaaggtgtgcgctaaggggattcaaaagt  
atatgtttgcaaagcaattccaacatccggaagtgggaagaacttgtgcctcctatggctgtata

cgcaaaggttgccgcaggattgaagtcggggactttgtttgatgactgggacctgctgaatac  
gaaaattgtcagtttatcaagtatgacacagaaggggtgcaaaaagcacagtgagttatacgcca  
aacaacttctccgcacaggacttaatacaataaaactggaagagggacagagtgcattccc  
atttgcaaatattgtgacggtaacatccgcctctagtgatgatattcacggtgacacaatcatt  
gaattgatgtacaagacaaaggatggcgtaaagggagtctcaaaaattgaggacgaaaacatca  
tcaaggtgaatccagcagaagaaaagaataatagagtacaagccgagaagacctgtattt  
tgagattgattccgatgatgaggtgtgtgagagaacagaggaagaattcttcaggcctacatct  
gttgttgctgccccgacaacaccctcgtaccttctaattgtggaggaagaggaagaggaagaag  
agcagatggaagaagaggaggaagaggaagtagaaaagggagaaggaatctgataaggaagatga  
cggagacgcaccagcacaggaagaatggaggaggagaaggaagaagaacaacaacaacagcca  
gaagaagaagcaatggtaatgagaaccaagaagaagaacaacaacaacaacaaccagaaa  
gagaagaggagaataaggatgcagatagtgacagcgcacagtgatagcagcagcagcagtagtag  
cagcagtagcagcagtagtagtagtagcagcagtagtagcagcagcagtagtagcagtgaaaat  
gaagctgaaaagaagaagaagaggaagtagcctgccaagattcagaagagaaagaggctaagtg  
aaaggccatcagaagctgcttccctcctccaagagaatgagagtagaagaagaacaacaaca  
actatcaccatcattggacatactccagactgcagttgatgagatgatggaagaattcctgcg  
cctgagcctatcgttgctacaacctcaccgaagcagcgcacttgcaactcaagacaggattta  
gttactcttcattcgttaagaggagatgaccttccagtagctggtaatacttcccctactgaacc  
agcagctgtgcccgtgctgccacttgcaacttccgatgttggaatgactttttggacatggtg  
gacggtttacctggcgatatagtaatgcaacctggcgaatgacgacgtgaccgcaaaattccttg  
agggcatcaccctaccagatggtagtataatgaatgcacaggtttcgtatgatcttcttaaagc  
caccgagactgataacattataaccaccacatgctttacctccccgattcaccttcttagcaac  
tcagccccagaaaggatattgataattgcagttctattaagaggtctagggcaggttcacttt  
ttgacactgatgatgatagtgaaacaaatgaggttgaaaaggaagcccctaaacgtaagaagca  
cttgaaaaagaggcgtaacaagtcccaccgtggttcctctggttctgcttcttcttctcattgt  
atgagtagtgatgaagaatcagaggatgaaaggatataaatacaacatcaaagggttcacaagt  
cacaaaagctcatgttaaacattcccctaaatatgatgctgtaaatagtgatgtaataactc  
atacaacaatgttaatagtacaacatgcatgctcgtcatcagatagtgatgcagaagcacagcct  
aaaagccataataaaaagccactctcgtaaacactcttcttccctccacaagtgataagaacaga  
accaacaatgctcaatcaataactcaaaatgtcaagaagactggtgtacagtctccacctagttt  
tagaagtttttagtcctaagaaagatgagcttggtgatttcttgtcacgcaagcacacaaagcca  
gttaggccctataacaagaagcgtgataatgttaacaccactaataatgtagtacagaggtctg  
cctgaccgactcaaatgatactcaatcaatgtacaataataatcttagtacttaacaagaagaa  
ctatatttttataatatttttacatgtcttaataacaacaaaataaaagaaaaccaatgtatt  
atatgtttaaaatcaacccatttgcatgattaaactaactatagtggtgtaaggaaagaaaaa  
aacatgattatcttctgccattaaaacaacaacaaaaattctaagcttctccttcttcttctgtgt  
ctttgcagattcgggagtctttctaaaaccacagcaatacaaaaaacaacacaaattctctact  
gctctccctaccaatccccctatcgcccttatgctccttctcctctctatacttctccccc  
tcacttctgactatcaattttctgattcatttcaacaacaatgccaccaatacaattactacc  
cacacccctccatctatgtcctcgcagcactctccatcgtctttgtgggatgatgacgatgat  
gatgacgaagaagacgaaaaagatgtcaagcaagaagtctcgaaccgtccccccatttttctg  
acatggaaactgtatcttttagtgataacgatgaggacgataacaagggagaagaagaatggtt  
tggatcaaaactttgatatgtttgggtgattcagataacatgccatcaacttctactgccccttc  
cctcctcctctacaacaacaccacttctactcctcgtatccatcatggatactgattcgggatg

aatgtgacgaagaaggagcagcagcagcatcagcaccgtctattgcccctcttcttctatccc  
tgtcgggatctctgaagctgaattgaaaaaatggaaaagaaaagaggaaggaattaagaaa  
ctcaaaaagatgatgaaagatcctctccctcacctatatgtaggaggagaacctcctgtcgcag  
cagattataaaacaagggcaaacatttccctttataaaagttgaccctagtatcgatatgtgcgg  
tgtcgcctcctcaatthttgctgaattgccaccccatccatagatgtgtatacttcttcc  
tatgtatthtctcctcccacacctgccatgcataataagaaagggttcaagaaatgtcaattcc  
ttaaggggagaaaggctttgaggaaatggattcacgagaatgtatgcatggcccctcccggtaa  
aaggggaggtgtatthttggctcacttggaaacaagattcttggctgaacatggagatgaatac  
aaggtccaaggatgtttgtttcaagagtattgaacaaagctthtcccgaatctgattgctcgtg  
cagacacactgtgcagtgatatgacattctatactaacctthttggttgatagttaatggagttgt  
cgtatgctthtgataaagatgatggaggaatacatggcgatgctgcagagtatgcaacaggagaa  
aatthtgatactgtagtgttccacaagaggggaagaaacaaaagaccaatgggagtgccagtaaga  
agagggctctcacgcctgacactagtaatatgggaacaagcactgatgtgcaagaattccaaac  
gatgggaacaaatactgatatgcaagaattccaatcaatgggaacaaataccaacctcatagag  
actcatcagtggtgtgaataccaaccttcccacccctcccccaagattggtaattactc  
ctthaacgaatgatgtaccagaattggacatgatgtggctthattcgccttccagaggaggtgg  
aaattctagaatgagtgcaatacaggaacatctcccctgtctaacaccccaattcctacctgc  
ttcacaggaggtgcaatgtagtagtgctaatggattthgtccctcccacgttccccttagaat  
gtgacgaagatgatccaagtattcccgaattcttacaattacgaagaggataaagtctthcatcc  
atthtatgagtatatggccaaatatctatcccctcttgttccatcatataacaagggacagact  
tgtaatgttgtccaggagtggttcaagggatccttctctcttgcaaagcgtagagggaacagtcc  
ccaaattctgtagtaaacattthcccacgctthtctthtgtaatatggatgatgtactgccatgtg  
caaatggggaagactgtaattagacatggacaatattgtaatagatgatcgtgaaggaggtca  
tgtacatccatgctcgcataatcactacattgtttgcagagacgcttcatgtgatgttcccagt  
gcagggaaagggttcgcacgacatggatgactgattgattgggttgatagtgcacattthctgt  
atattgtgtaataagataccaataaactaatgtthttatataatgattctatthtttaaaaacc  
thtaaaaatatacatataaaatgatgtatthttgaaactacactctggcagaatcagaccagac  
ccctgacctaaagcagaccacaggggagcttagagaggggtgtgaatctggctaggggttcat  
ccctcaatgttaatcacacgcaagtaaaaacaccacttcttagaaaaggaggggaaggggtgact  
tggatgatcataactggggaatttctctccagatatctggctgtacacgtgtgagcgttct  
ggcgcgacaagaaaaaatttagtgatatcataactggggaatttctctccagatatctggct  
gtacacgtgtgagcgttctggcgcgacaagaaaaaatttagtgatatcataactggggaatt  
tctctccagatatctgggtaagaaaaaatttagtgatatcataactggggaatttctctcc  
agatatctgggtaagaaaaaatttagtgatatcataactggggaatttctctccagatatct  
ggctgtacacatgtgagtgthtctaactctcattthttatataagaaaatataactgaattagctct  
ctaaactthtctcatttcttactcctctthgtttgtatgtcctactaccagtggtgcataaag  
aactggagagatgggagthtttaataacaaccttcttaatccctthtcatgtttatatttaata  
aatataatcaccatggatatttcaataagacattatthtttagtagtcggtacctthttctga  
ccacttgtgcatcttgcagtcacaactcaaatcgtctggaacctcatggtagcttcatthgttg  
atthctaggacataaactacttaaaaacattcacctgtcaatctggatcttgtcggaaaaagc  
ttcgtatthctctgcaagthtaacctctcagaagaagcccgtthattgaggattggaaacgtat  
taagggactataatggcaacaattthgaagagtatgaagaagaagaagatagtggtattgaaga  
ataataataataaatggthttgaataaaatatagagatacatttatattgtthttatthgcatt  
atatataaaaaagcactacaaaattthgtacacatacattgagagaaaaaattgatacaatttct

tcctttttttactgggatctgatttcttgatattcgagagagtttagtagtagcagaagaagta  
gcaccaactccggcagcagaagttgtagggataggggcggtggcaccggtggcagcggcagcgg  
cagcagcttcacggcgttgttgttccaggataatctttgcgcgtttattcatttcagtggg  
gcgtgtaaagatgcctctgttgtattggaccaccttattcctataattctccgatgtccttatcg  
cgcttctcaaaaaacttggccatttctccacaacgttgacgggctgcccatgcagtcatagcca  
taaaatcaaattggtcagaggtgatattatgggtgtttagaaggtccacagcgtaggccataca  
gctagcggcacggtgaatattggagtacttgcctgtttcttggtttaacgggtatggatcacctta  
cttccatcattcaagaattctgcctcttctctgtgcagaagagatgtgcctctgctaactgtcc  
cgtcgtcgaggacaaaagcaggtccaggtatgggtgtttcgcaatctccgtaagaagtgtcagc  
aaccgtgaagtgggaaggatatagtccattatctccaactccagaagtgagtgacgcgctataa  
acttctccgggtgatttggcgagtactggattacttagccctgcgtcaatttcagacataattc  
cttcttcgggtgtgggaaggaagggcctaggtggggcgagagtgctggtgtttctttcagccgt  
agtagtagcaagagatgtgacccaagaatatttcttgttcttagactgtcttccagaaccgctcg  
tcgataacaagagatgggtcgtcctcgtcactgctacgggttgccattctgggttcttcttctct  
ttgaatccttcttcttagacttggacttgttcttggggccaggaacaggtataacatccacatt  
gggtgtagaagacatcctcgttccagtagattcagtcagagatgtaagtgtggcacgggaggc  
atggccgtaacagagataccttgtgggtactcggcaacattgcagaagaagacgtagaattagagt  
tgatacttgaacagcagaagcagaagtcggagaggcgatggcagcagctctggcggcagcaat  
cataggggctgtagtggtgcaaactcggcagagtggtggatgaagtcgtggcagcagaggtagag  
ttgatgtgagacatcttgatttcttgggtgggtgggtgggtgtggactattgtgttctcagaga  
ggacttgtagtgcactgtgctctaccagatccacagcccctttatataccgattttcgggggt  
tgccagataactaataactcctccacgccctcttcttgcgccatataataagggtcgaaagtt  
gtataccttgagttgatccgggtataaaccgccattggtgggtcttcttgagaatcgagagttgc  
gatcacggcatggcctcgtgggggaattttcattgacgtaagcagtaacgtcagaagaattgtt  
ggagcgggggttgggttaaagtgccctctgggtgttgggtggcggtgtgggtgggtggcgggtgggtga  
gcagcagcaggggctcgtagtggtcgtattgctcacaataatagtccttgggcacttgcattc  
ttcttggatgaatatacttcttcttcttctcgtatctgggttcgtcctctctttttatgtgttc  
agtttttatgtgagttactctgtccatctccattttctcagaatttcttccccctccattgacg  
tcatccgaataactcaactggcgccgggtgatactgatgacgtcttattcttccggaccttattat  
cccctccttctgaatcatcagatgattcagagtcagatgaatcagacgaatcggatgagtcaga  
ggaagaagaagaagaatcggatgagtcagaagagtcacatggagccactcccaattccactacta  
aattcagcttccaattctctgacgacatctatatttttagtatctttttcttccacatcttgat  
tcgtattagggatgtcacaccagtttcttggcttcttctgctgagggatattttcgaaacctc  
aagaaaaggaatgtcaataaaaccttccatttctacgatctccccttcttccaattcttctctt  
ttgttctcttcttgttgggttcttgagacgggtgggttccagtaaaatttgggttatctgtagatc  
caaatccaccagttccacgcacgcttcttgccttgatttttgttgccttttttagaactagagtc  
aataatcgttctctctcccgtgggttccattaatacacaaatctgttcttctcgcacatcaca  
tatcttaagaaaatcaactgggcaatgctgggtcccttctgattggcacactttttctgcac  
tatggttgctcagaatcactttcaattctcccctataatccacatcaatcgttccagtaggtac  
actagtggtgttcttccatgtcatcccagaacgtgacacaatttgtccataacagccgtcggga  
aacttgtctattccatataccagtagagatcttggccagtcacataggttcgatatacatttctt  
cagagggaaataggtcgtagggcagacaaccgggctggcacgtctgggagggaagtgagtttc  
ctccccgggagggggaatctcataaacacgacagatgcagatgagtcacatgggtggatacagg  
gagtacacagtgtagacgggatgtaataagtggtcaacgtctggaggacaagtgagtaccttcc

tcggttcctcccacccttttataatcgtgaaacccccacacccccgctaaggcagtaaaaaaaaa  
ttgaccaccatcacccttgtccttgaaggaggaaactagaagataacttttatcatggcaac  
atttactgaacaggatcataaaaaatgcggtttttatatgctaatagagaagctgaggcaggaaaga  
atatacagacttaaaatgtctgagccttcagtttatgctttttattgacataaaagaaatagaaa  
atggttgggaaaaagaattcgggcttttagtacaaccaggacagaaattagctcctttcaggga  
tatttcttatgactcaagcaaaccttgattgtgacgcatttttcttgacataccttcagatatactt  
cattctgataatgaaaaagagtaggagagtgcactttgccgaacacacacctctgtctcatttc  
ctgtcaagaaccctgagggaaaaacattgcgccatttcacggcatgtggtccaggggtgttaccg  
gaggtacaagcaagagacccccatactgggtttgccagtagccagaggcgctctgatgcaagat  
cacgttgaccatgaaactggaaataaaatgtgtgaatatctgaaccagagcttagtcatgtggg  
ctgctgtcccttgatacgcactggagaccttactgaagggtacaacacaacacacgtgcctgg  
ctttgcattcaaggaggatgacgaaaggattcaaaaagagttaaatatgaaaatgtgggtcatt  
tcaaaggcttattgtgatttctttaaacagtattatgacgcagactctggctcatggtatcgat  
ctggatggatgaaatgttccatttaagtgttgggcagtttttactaatctttcttacaattt  
agctaaccctaaaccttacaatttaactggaaatacatgggtctgatgtagtttctgtattgaca  
gataaccctattgtagatgcggtgctgctccgtccagatctgaaatggatgaaattatcacca  
agaagaagttcaacgtattcccttctgagcagacatctgctcgcagaaagcagagaaataat  
acgttctcagtagcggagatgggtgtagaaatagaccatcttctgtggatgctttaatgcagttt  
gttaataggggaaggtgtagtaggaacagagaaaaaatccgaccgcctcatgagtggtgagacg  
ctgttatggatgcggtatgcgcttcaagtcattgggtctggacgacagtcaatctagacgatt  
attgttaaaaaatatgattaaaatgagtagaaacaaccagaatatgcaagacatttttccagt  
tctctcaaattaattggagtaactttggccataaaaagatctgttttctctaaaggcgcttcag  
ctaaaagaaaggaaacggccattaataatggcgaacagcatagaagaagcagatgggtcacccga  
gacggtgacagaagaagatgcactttttatttgcaagagaaaaatatcactgaagacccaaaacac  
cctgcgccctttgtggacattttacactcaccagatatcaattcatctatcaagagcggttctt  
cttctcaatatggaacgatatactttcaagaatcttctcgaccagaaaactggaagaaaaggc  
gagtggttttcgttaaaaatcttgtgggtgaaagtagtgagacagttcttggacattttagaagg  
aaactgttttcggacggatacgaatgggacgataatattcctctgatgataggcgtggaccaa  
tattgagagaagtcattaaggcggccagtaatatgtgctctagatttgcctcctcagctctgga  
gtctagtttgggtactggctttatagactcggcgagtgctatcacttctagggttagccgtaca  
ctggcagccagaacgttctccgtatttctggaggagtctgttatagaatgtgtagttgccgcaa  
gccttcggctagcgatacaggcatttgccgatctggcaactcttgccgcgtcagccttaaccgt  
tattggaattgttatattcgtaatacaagtacttgggttgattttggatcttgcgctagggtta  
ggttggtacgatcacatttttagcccagaggatttaaagaagcagggttctagtgtttaggagag  
agtttgcaaaggcaggaaatgtagatgtgggtgtagctcaaccagtcacccctgaagaaatcgt  
cgctatcaacgttttcttcaaactgaagaaaacggggaagaaaagaaggaagaaggagcacga  
aaatcaaagattgattttcttcaaaaatacttccattctactcctttgatgggaaagaaaagta  
agtttgtctacatacaagaagcagctcaagaatacttgggaggaagaacaatgaacgcttttgg  
gcagcgtataataacagctgctgatgatagtgacaccaccaccacacaagaggggaaggagg  
gatgacgaaacagtgactaagaaaatgaggagtattattctagaacagggtcaaactcttaagg  
attactcgtctgctgttaactataacgcctcccgctctagattacgtgggagaggaatgggttaag  
aaactgacctaaaagaagagacaaggagcaacactactagtgataacctattcaagaaaact  
gtttctcttgctagtagtgccggcgcatcttctgggtctaggaatagggtgattggtagcgtccc  
atattacacttttacggtttcaccaatatgggtctagcttttgcggttcgcaggtctcctagcatt

tattgcacttatgagtatatcatatataaacatgaatgctatgggtgtagtgaattcggacgca  
atatacaggtctactgctctagttggagatatcaaacagaccccagaagagtaggaatgggtcc  
agcgccacgtaggtgtcggggctaataacaacatgattacagatctcctcaatgttaga  
cgagatcgagagtgactaaaaagtgagggttataaccccccccccaacaaaggctttaattag  
actcaaaccaattcataatcattgtgaagacatcgacggtcgaggaagggtccgtgctcaaaag  
gtcccaaaaatattcctcaatcaaaaaataccatggattcgttgactaatacagtaacactcct  
cgtgaatgaccgtcttgaaatcatcgaacaaacaaaccaatcacccaagaagatgtggaaaat  
actcttaaccttaacagctctagaaagggcaagctttttgaagttatattctgttttcatcaaag  
aatgacagtcctattctggatgtatacccaagaacaagtacacgaatgtgcaagaaatattcga  
agatggactaattactttcgaatggagagatggaacaaaagtacacagatcagtttcaccaagt  
tcccctatacctctttctacaaaaaatcgccctcggctcctcaccttcccctcctccatcgatgc  
cttctattaaagaagaagaatgtgaagaagaatgtgaagatgatgaagaaatatacgaacaga  
tgaaaatgtggaagatctcataaatgggtgatggagaagattcagaagaggaagaagaagaat  
ataattggtgatgacgaagaagaagaatgaagagggagaaaacaagtacgttctcgcattct  
ctaatcatctgaggcgcagactgcccgcgctgccgcgcccgcgagctgctgctgctgctga  
cattgagaagaaggacaaaaccacgcagttagtgcgcatgactacacactgtccgcctccag  
caacagcaacaaaaactgctccagcaacagcaacagcaacacaccagcagcgtcctcatctg  
agaaggtcacctccacaccaacaaattcaacaagtttttactgcccagtaatggcttctcaga  
acagaccgagctctttgtttgtttcgatgtggataaaaattgcgcaatataatggactcgtggag  
ctagacatcttaccattgttgctgaatacattatcaacggccttggctgaaatgcagtatgg  
aaactccccagtgaaaccgtgcaggagaaaggaagtgaagatgtgtgggtgtcagcctaaac  
tagctttgaaaatgatgctgtggaagataaacatctcgcattcgcagaatcgccctatacttcaa  
aggcctagagatctccctatccctaaaaaatcacgcctatctttgtttagacgattctgtag  
acattaaaaaccctgggggttcgtgtccgcttttgaaaagtggatcaaactttcgagtgccga  
atattcgcgtcattttaatgaattctcaggagttaaaaatgacgatgacacgtcttcaaact  
tgctttatatactctcaaaaaacccccacattgaaattgtatcaaaattaaatattgaattg  
aggtaatgatggaggggaattataacccatagaaaagatgtgttcgagacggggatctttgagcga  
ttcttcattagctacggctatggcattttgccacccaaaagctagagttcgaatggtgcattg  
ttttatcttctgtatattaccattctctaaaataactcgcaagaaactataaaatggtcag  
agacggataaggtacatattgggtcagacgcgatcttttctcccccaagtgataatcctaata  
aagtgctcaccagaacaataacaacaataataacaataataaccagtgatgaatcgcaggacaga  
cctatccgaataataataagcagaaaaatgaccatcacaactaccaatgtatggcatgca  
aggaaagatgcacaaacaattgcactaacggtaactatcccgatcgtggttaaccagcacttgtc  
acatagtgtaaaaggggaagatttcttttaagatttttaataatagtaaagtagattcattgaaa  
aaattgagcagagtagtattcccgtcctccctctggaaattatacatctaagttttgtgata  
gaagctctatgtgccatagcttcttttgtagagggatcgaaccagtgcttacttctttctcatc  
ggacagttttgaaaagactaaacttgttttgtatggtaaagtcggttgacgttatcaatagttat  
tctgccataaaaacttcccataataatagaatcagggcttttttaactctgaggaaaaagata  
ataagactatccccctctagagccgaaagtgcacaaaatgcattcaaggatatacttgttcacga  
atgtaataaagaacgagctgtttcatatgttgagcaaaaacaattatcctctaagatgggcat  
ctatctaacaagtggtggatcgaacttaatgacttgaacattatgtttgagaaacacgtggaag  
atttttacaagaaatgttctaaagtaaagatgatgcagaatctttaaaggatatttttaagattt  
tgaaaaaacttgtgataaatacaaaaactgccaagagggcaattattggagcacaagacccttct  
acttctactccctctaaaaaggagaatgggtatcactaggattattagtagcattatccgaatttc

attcaaaagatgaagctacagtaagtgcccttctcgacaaaacaatgctcttgggatcgaggac  
aataatgtctgggtgtagatgtgtttatacgtacaataagtggtgttttcgggctttgaaaataag  
aacactaataataattgggaacttgagattagacactatgtcatctctatgggaggtgctgcag  
tgacaaagatttccgatgaagatttggacaattcacgcctgtaagaggtgctgtctctgtcac  
tacagcacctaataagctacctgtaggggcacatcagacatggaaggatgaacaaacta  
aaaacaaactaaacgtaatagtctatatgactcttacaattcaaaaaggaataatagggata  
ataataaaataaaaaatcgttcattaaaactatcagattttaattggagaacaccaatctc  
tattcaagaatttaatgcaataaagatgatgtaacaagaaggtacgcagaagtcgtggcg  
tcagctgctccaaagtcaccttcaccaacgagcagcagcagcaacagcaacagcagcagcc  
ctctctttcaccgctctcaccacagtgagaatagtaataataaaccattgtatattcctcc  
ccataaaagaatgaccactactgctgtttgaccaatttatgggttattttataatggtgtgtga  
tattttatacaataaaaaatatataagaaaacaaccaaataagattttgtatctctgttctgtgt  
tgggcggaattcctccgcgccattatgatgaaaaattgctagagccctgaaatcctgggtca  
cgacaagggttaacaacaaaaaaattacctgtatgtgcaagtcatactcctccagtcaccgcat  
gagaacctgttattgcaccacgattcgtgtaacaaagtcgtatctgcacatgtgcataaattcc  
ttcacgctaaaatgaacgacaaaattgccgggagcaatgggctgagagccggttcctggaaa  
cccacctccgttcacgcactacctcactattgcaccattttttgggtgtataaaaaggcacgg  
agaggtagctaaaacatccactcgcagagacatcacctcaagatgacgtctcctactagtgtc  
ctccgcgttgctactactgcctgctgtttgctgtgggttacggctactgtgatttctgaag  
ctgggggaactaagatagacgaccgctgcgcctcccgcctatgtgactactcccgaacctga  
atgtcgtggaagaagatgtgttagagctgctcgaagggggaacaacaataacaacggaacc  
cgtgatggagccaaagtctttggcgaaatcgcaaatggactgattgggctgaagaggcgtgaag  
cagtatcttaacaccagtcctatgaagatatgccagatttcttcccctaccctcaccctgagca  
tcccattggagggcgtctaccacgtgaagcagctcctccacttaaaggtgcacttggacgtaaa  
aggcgtgaagcagctcctccacttaaaggtgcttggacgtaagaggcgcgaagcagaatcct  
tggaggaagaacttgtgtctgctgaagaagaacgtgaaaagcgcgaagcagctccccacttaa  
aggcgcgaagcagctccccacttaaaggtgcttggacgtaagaggcgcgaagcagctcccc  
cacttaaaggtgcacttggacgtaagaggcgcgaagcagctccccacttaaaggtgcttgg  
acgtaagaggcgcgaagcagaatccttggaggaagaacttgtgtctgctgaagaagaacgtgaa  
aagcgcgaagcagctccccacttaaaggtgcacttggacgtaaaaggcgtgaagcagctcctc  
cacttaaaggtgcttggacgtaagaggcgcgaagcagctccccacttaaaggtgcttgg  
acgtaagaggcgcgaagcagaatccttggaggaagaacttgtgtctgctgaagaagaacgtgaa  
aagcgcgaagcagctccccacttaaaggtgcttggacgtaagaggcgcgaagcagctcccc  
cacttaaaggtgcacttggacgtaagaggcgcgaagcagcagcagcagctatgcctccccctga  
agacgatctcgacttcttttacgcacctgttgctttgcctctacatggagtatggaaagcacca  
gaacctacaggttaaaatgtggctgaacatcacatatacaagttaattggataattgaaacaat  
ttgacttttttagtacttaatgtttattaattgaaacaattggactctttcctacctaaggttta  
ttaattggtacattgttaacacttgccttttgctcatagcagacatacctgctatttttaacgc  
tttgtttaacgtgctttttacaattgatattggtacatgtttgtgacctcttgaataaattttg  
ttagcatcaataattttatttttatccttttcttgtgtgttagaattagaaggagatgtgg  
aggttgttgatgtagtagatgctgtgcagagttgctcctgggtgttgcctctctcttgattcac  
attgtcctcttcaacatactcctctaatacgaagcgtctcgaattttctcctttacacctca  
ccacaatctcctatcgaagactgtgctaataataatttttgtagtagaagtagagaataatggta



caacgttattgatggttacttctgcccataagctggtagtatttttgaaggcatgccttaaaa  
aagggatataatcttctccttttctatacaaaaaggataatcgttcatccccatgaaaaagtgtt  
agatggggcaatgtacacctatagaacagtggtattttcttctataatcttccagtatattatacca  
gacctcttgccccatagtttctgatatctcattttactattcctgtctctctggtgaaccatt  
ctgagccaggtgttctgcccataatttctgatggtttatcaacaacaatatcagctgaaggggc  
aaaaggccccccatcttccagtgcaactattcccattagaaggaagtggactagctggcataggt  
gacaataatgaaggagtggtgaaaacacaggataatcatccacaccctctgtcactagagatt  
ctagatccgggggaggaggtgtaggcaacataatttccatctgcatttcttcccccgacgtgga  
cggttgctggttcttactccttctacctctacttctactccttctccttcttattattttct  
gcttctagttccttaccatttccacgcctgttgctagtctcattttcttattgttatttt  
ttatgcttctttagcttgctttgttacttcatatgtaatatcagatgagtagtatttgcctgg  
acaataagggttatcactcatggctgtataattagtatcagaattgccaatgtgcattatctttt  
gtataaaactcttgggtggtttatttgcaccagccgtgaaagtatttggcagaagagccgagg  
ctgatgaagagtttggcttaacatacttttcatcgatagttttattaataatgtaactaaact  
ggccgaacacttactatcccggcaattcgcacatgcattatttcttctttttattatccatt  
gaggcctccttgcagtttcaattaagctgatatttggcccatgattttaaaggctcgcacaca  
gtgccatttctctcctccttctctagttgaattgatccccattcattaaattttcttgtag  
agtcaggagactactcttgagaaaagagtgtaaaagtgttgagtagttatacaatttttcaac  
gtttcagtgattgggtcgaaccgaatttgatctgatttcttacctatccagtaaatccttgt  
ttaattctccgtgtcagaggaagggaaagaaattatatcattagctggaattgattcagaaaa  
gtgaataattttaagtacatttccgtctgttgaagaaggggtgcttttagatcacacgtgctaagc  
attacatctaatgataagaaaggggtaactcttctcctgtatcgagatttcttacaacatttt  
ctgggtgtcaagagatcgtctgttctgtcactcccaccaatctcttgtaatcttctcctcagcaac  
agtttgggtgttattatagaaagaccataagtctgaaaaattctcctcgcagctctcattatct  
gcatcattagctcctcctcctcctcctcctcctgcccacattttaaagatctaggtagctactca  
tctgggaggggaaggggaggggttaaggggtgtatataaagaggcttgtctgaagacgcgagtgat  
cacaacttcaacgatggacgtcgagttcgggttcttccacggctctgctctccaaggcccttctc  
ccagatgaaaaacatcaaccggtataaggcgtcttgggtgaggtgattctagaataagggag  
aggatggctgctgctcgttctgtggaagaagaggaaacaggagagagcaataactgctgccttga  
acaactaatagacgtttgttcttcttataaggaactgtctcatctattgggtacaattatcaattct  
aatctttcaaccagttgttcttagactacaaaaaacgtcagacagttatgctggcattatccatt  
ctagttttctggatgtggtatataccaagtttgaagaaaacaactgaagacgtattgcctcattc  
ttacgtgccatttgggaataaacaacttccaaagttgtatgaaaaaactcttcaaccatagaa  
gaagaggatattgggtataaggattatggtgttcaattgaagacgacgacaatggtgatgatg  
gtgaccaacaagaacaaatgattattgatgagaatcttataaaactattggagaaaaatcaac  
cattgaaactgataggcatgtataacaataacaagtttggtaatgaatttataaggattccttta  
agagaaactgcttgcacgcacaatctctgaggtacgacactgaagctaaatttgttaaccaca  
aggactctatacctctattttatgaaaacagcacgtgcacatgtaaggaacgtcttattgattt  
ttctgagagacaactacaacaactaaaacaagatggaaatggataaaccaacggacaagtagaga  
ggatcttttcaacacgtatacagggaaatgcagtaatacgttccggcagctaagcaagcactggct  
attgaaaaacacgcagcagaaagaagaggagaaaaggcatggacgacttccagcagcagcagcag  
cttcttctaattttaataatgtacaacaagattataactgatgatgatattacacaagtgctctat  
tgcaaacagtggtttgaataacccttttttaaagagatatgcaaaacttatagataatttagca  
atatcttctttacctcctgatataagaggatgatgtcattatacacactagagatgcctccaact

ctacagtcagagtagatggagccaatatctatctcgcataaattgacggtgatttatgtgtata  
ccctaaacaatatatatctgataaagtgctgtgtgggttctctcaaccgggaaaaggcactgttc  
tataatagctccaagaataagtggacgtatggatgtaacctaactttgatatcgttgacgctg  
ccatcatgaaacacccccgactacaaggaagagactacatctacaaaacatatacgtaaaatatt  
gggtatcgggacatcggaaaaactgaacattaccactatttaaactactttatccaataaatc  
accatgtctatatacagcccagaaatgtcagccatgatgaatgagaatgaagaaaaaacgttc  
tcagtaataggagggtgtaatatgatcttttcataggtgtgtcattttatcactcttggt  
cttaatcagactagatatagatatcaaatatgggaatgtgggagagagccactattgtaaag  
aagactagtcccatttttaaggaacctatccagacagccatcaactttaacaacaaaagattt  
cccacattgaagatggaggagaagaaagtgatgttatagcttcaaggactgttagttctctcca  
gagagatcctcgtgtacttttaaccagttcatttggattgtataataggacagattatatgaaa  
aaataaaagtaccaataccatatcaattgttttatttcatcattagttaacatctttttaaat  
ccacaatcagagctaaaacatagtgacgttatacaatacaataacattttctccctccaatga  
tacaatgttgatgttctcctccatataacttttcaatcaaagccgagtcctgttccttgataa  
tttatccatgaccagcttagaatttctccagtacatgggacgaaacactaacctcactagga  
ttcgtatcattgtgggaagggtttatacaacttcttgatgtctttacatcctcagtaggcattt  
cacccaataaattaacacatctcttataatagaacagactcagaatcacttttaaatcttc  
tatgcattcacctcctattttagatttattaaaggggtgcaaagaaaggggttcttctctctc  
ttcttttgacatcatttttacctaatacacttaaacctatctgttctcttacaaggactgaa  
aattgatatctatataatgtacatcttcaaatttttgatattgcgattaacatttttgatga  
ttctggaacagggatcttctttgcagtcgctcattctggaacacgtgcaggcaggttctggg  
acaacacccatggatagggcgatagcattggccagtttactagccacatttttggttggtgga  
taaaagtcttcttctttccaaaacgaagaagaagacgctacatacgtctccttgctcgtcacc  
aattacacgtattgtgtcccttttgtttaatattttgtaggcaaattccagtagtacttctctt  
ccttcaacaagaggatattccaagttcttcaaaatccttttctaataatccacactctcctcta  
aagacaaggaagaggatgtgcatttgggcagcaagatttctgtggtgcacatattattattcaa  
accttgagaagaggacatttttctctttactgttcaggacgaggagaattgggaggagttatgt  
tagttagtgatacgtcttgccgctgctgatgctggaggtagaatgaagaccacagcgtgagggg  
cgaccatggcttagatatggccacgcccagcactggcatgaattgcccctgagagggtagccat  
ttagtgttttcactcggatttttccctctttattgagagttgccaaaagtttattatagttgt  
ctgtgcatgtcgataccttgtctttaaactcgtccaatacttttggaatcctctcccagttctt  
gctgttttatttgcttgattctgggagtcttttttagttcaggcatatactgcaacattgtgtat  
tctagtgacgacagataaaaattagttctatctgtgcataattttatcctcttctgttttaccac  
aaaattcactatgtattatgggcatttaattgctggtacacaatagtattatcctctagaccgca  
catgttcatatacacgataactaaaaggttcatggttttacactataaggaacaccagagaat  
ctttcatcgtcgatgccttgaactgggttcatagagcaccacgttactattggttcccgtcttctc  
tcttattggcgtccattaaaactccacttagacgtgataataaactattgtcattgtacgttat  
attgtcaagagaaatgcatttgtcgaattcgttaacaatttctgcccacttttcttcatccatc  
acgggttgtttattgttaagttttgatgatacagaacatcttgaatgttcatcctcttctatat  
tatttttagcgcgatgacgtcatttcgttcgtggctgcagttacagcttctaaaaagtcaga  
atctttatactcgaacgctttccttgccctcatctaaccagtcgtcagtttctagatctgcctcc  
tcttctctttttcaccttctccattttttcctcctcctcctctacatcatccatttcattga  
attttttaagaaatctaaaaagtcactcgtgctgttattttgttcagtttttaagattgacgt  
ctgctcagtagatagacctgggtattgacgatactattcctcctcctcctccattttcttctccc

aatgcttctggattcgtatctaaattattacaaaaacatcaatcctttcttttagtcaatattc  
ccctatcattaattataccaccttcagtggtgctctcaaaaaatccacgaattgattcgaaaac  
tgacgatgataatTTTTtagtaacaggtgcactTTTTctggttgcattaaccttactTTTTctta  
cgggtagatTTTTgagggtcattaccactTTTtacgtttattattagaaaatgggataagatcct  
cagtatcagattctacatccgacctgtatTTTTactctcattattattagcaccggaaagatg  
tatactgatatctgataagggttgattgttacaaaaacacgttgattaaaggacccattgtc  
aaatagacatgacatttgccgctgcatttacagccagggtctatgaagtgcgtggttcaaac  
taacgtcagtttccaaatcaatcaagtgtggttgaggaaaacacaactgaagcgggtctcgtac  
aaaatctatagcttgagacagatagaaaaatTTTgattgtccagaaaggaagtactagtttctta  
tcacattttctacaattactTTTtagacaaattccccatagaaatattaccaactatcatcac  
agtctttattattcttccctagcttcttgttccactcaaaaaaatctcccatccgcccacacaagt  
acagtacgtgTTTTcaaatactgcaacttctttccttaccatgtgtcgtactcacagttacta  
acaattgcactattgtagtctgatcctttagttagcataatcaatagtgtactttcaggtgaaa  
gcatgagcggcgattctgccaaattatataatcgtatTTTggcttTgttcttcttttagctgcaa  
accacccaactcgtttgcttgattttcaccocgaagaattactgttcatgcacctaaagaacttg  
acatggccaatctttaagaacgtttcagagtccttaaattgtgtaccagtaagacgcacacagt  
TTTTatgatgtccaacctcaggttccattttcaccagcacatcagaatcgtgggagaaaagatt  
catagaaagtgtttgattttcatcgttgggtgtgttgcctcaaaacattcaataaatcttcccac  
ctcttgattctTTTTctgttaccagacatattataagaatcgtactccaatatcttccctTTTT  
ctagtagggagaagtgtttcccaggagtctccagattcaaaaggcatgatgttaaactgacgat  
atcatcctctgcttcggtgaatgatgcattagaaaggtagatgcattttgctccccgtagtctt  
agaacagggatcctcattatgtccagtaatgcagatgccatcagaccttgaggaagacgcacatca  
tcatccgctcgcacgagtagaatagtagatcgttgggtcttccctattgaggcaatTTTTcattcct  
tgattttgcctTTTTccttacttcttcttctgtctgatctgtcgtttggctctcgtcatcatcttg  
atggctggagcctttccatccgtaaagagtacagtatacctccctttaaggTTTTtagacttga  
ggagatTTTTcatcactcggatcatcctaaaagcgtagtacaagatgacccccctccatctggct  
agcaaaaaatgcatctttgaatctggatttcaaaactgctgtcggggaagaattgaatgaagta  
gtaggcacgttccctgaacaagaaactgttagtcaaaaacttccctcttcttcataacatctgtgt  
gtttgttgatccagtaatcgagacctcatagtcgtccattttgtgattagaaactggaggagc  
catcatcatgtcttcgattggaggttcagttagccaatcaacttccctcttgggatgaagggt  
ataataggcactctttcaattctagccttaattttctcgtgtttatattttctagaaaagaatt  
cagaaataaccttcttttcatccctgcagtaaaaatTTTTcataaatatgtttcttgttctgcat  
ccgtgaatgcatagtatcttcttccctgataaacattaaaaccgtcatgaaaacgtctattatc  
tgttgatttgtagtattgataaacaggatcatctgaccataTTTTctgtcccttcaacatgg  
tggttgcaatTTTgcctgcccacatgaccagatctgatacattataagtgggcaaatcaacct  
gtcagtggtgtagtcacaggtaggtgaagaagaggaagatttcttgcctcttccaaaatccagg  
aagttcttggagttgatgttggcaagagaagtggctttgagaagtgagctagttgtgcaatctt  
cttctcctgaacaataatcctcgtcgtcttctcgtcatcgtacaacatcttcatatccagttttctc  
cttgatgactctccattctgtgcaccgtagcattttcgtacactTTTTtggttcttgggaca  
ccattttctgttgatgttactcccacgggatgttagacgataatgaatgctcactgatgggagc  
cgtaatTTTTacacactctgcgtagtctgggtgtttttaccctcctagaagaacttctgtggagc  
tgctttaaagggtgttagtcttggaaatctgcagcaaacgcagctctctacagagacttctcgga  
gacttgccagaagcaggttctctcttcttaaataggggtactttcttccctcttctctgttgtt  
tgtagagtgttatagattcagtaggggaagttagtttctagatcgaagaacagtgtagtcttctt

ctctttcacagtctcaatagaattggacacctcgttgaacacttctagggccaattcccacaca  
ccttgttccttaagtgtctcgaccacgtaatcaaattcggattcactcaataactgtaaggagg  
aagaatctccatccatgatacgaatctggaacacctgtctcctccttgactgttaactgatgtc  
tgacccttgtaaccactttactgatgttttataccctctcccgcggaagatgtatacgtcac  
aatTTTTTTTAAAAATAACGTTATACACCAAAAATGAGCGATACAGGGCAGATGGAAGAAAAT  
aggcctgctaccagaaaaggagacctggagatgaagaagaggaagaaactggtagtagtaatg  
ttccatattatgccaaactttggcgatgacgccacgtactccatgtacactggagaaggaaaaag  
gggtaaatttgtattagagccactaaagaaagaagtgtacaaaggggtgcaaaaaccacctaaa  
gaaaaggaggaaaggggaacaacgttctaattgttcggacacggagacctgggtcaagagtttgaac  
agaaagtgtacaagatcgatcgcgagaacggtcgaaaaacttgggcaaaaatttggcagagaa  
aggattgcaagaacggcaaaaagaatatatactccaaaggtagcacaacaatgacaaaaaaaata  
atcaggtttctgtgaaggaggaagaaaattcaaggcgcgcaacagcagacatctgacaaaggtg  
cagcaaccaatgttcttgaaaggggaagaaattgagatggctgcagaaagagaacaaccagtaga  
aattacaggagatactatattaggtgggctaggagaagaagatgacgaagatatgggagaggat  
gaattaactatacaacattcatctatggctgtatcacaacccttcaacaaatcgttgtcagtt  
ctctataaccgccaagcccactaggcccgtcctgatattcccatacaagaagatatagtggg  
gaaaaatattagccagttaccaccattaccacttgatgattatgaggacgaagaagacgaacat  
ttgtacgaagaagtgaatgatttcttagtgccaccaccaacagcagcagcagcagcctccacaa  
gacctcccaggcctaataattcctcctccacctcctcctgttgttgtgttgcagacgaaacctt  
gaagaacttggcttcaattgcagccttggaaaaggaggccgaggaacaaagagcggccgctgctt  
gaaagggaaagagaagtagaggaacaaagagcggccgctgctgctgctgctgctgctgctgctg  
cccaacgggaagcagacgaaaaaagggaagagaagcagaggaacaaagagcggccgctgctgct  
tgctgctgcccgtgctgcccacgggaagcagacgaaaaaaggaaagagaagtagaggaacaa  
agagcggccgctgctgctgctgctgcccacgggaagcagacgaaaaaagggaagag  
aagtagaggaacaaagagcggccgctgctgctgaaagggaaatacttgcccaacaacttcaaga  
aatgaaagaacaaatgctgcataaagggaagaggagaggcggaaagaactagcagataaggaggaa  
gaaaaacgtcgagaactagcagccaaggaggaagaaaagcgtcaagaaatattagctaagaag  
agcaacttgaaaaattgaatttccagttgggtacagaaatcacgtccaaaagagcactcgaaca  
aatgttagaagaagagaaggcctcacgctcacggctccgcagccagtgcacagttagcgatccaa  
gcaatagaatatgaggatgaacttctcaggcagtcgaacctcaaggacagttagttcctatgg  
atacggatttgtacggaaaaatgtacgatctcaataagaaattagaagtacagaataatacatt  
aacttctgcatttgaagacgtgaacaaaacaaacgaacagaaccaattggttgctcaatccctt  
gaaaaatccgctaaagccattgaaaaattaactagtcaaaaacatcttctgtggatgatcctg  
cttttatgcagagaataataacagagagggatttttctttaagaatctgggaaatgtttacia  
aagagttctcgggtctattttacattaaaaaggacctttttaaatcgaaggcattaattaca  
gataaagaatcaagggatctggaggtgctcctaacagatgtatcgacagatctcagggctaattg  
atctcaatacaatactggaaaggttggatgtatccgttaacatacgtctggtggaacattata  
cactaaatttacagaggcagacacggcattagcagatcaagttccttcgaggattgaaataagt  
aacagatcaagatctgccttattgccattttcatctgcaggttggataactaattttactaata  
gttccgacaagtacaatgaaatagtgaaccaactaagcagtataaatgaggctatgaatatttt  
gaaagaaaatattgtcccaacattgaaccaaatacaaaattgatgtaccaatctattaacagtt  
tcaagctctcgtcaatatgctattgaagaaaggggtgatttctgatgtgtcccgaatggattctg  
aaataagaaaattcctcgtataatgaacagtaaaatatccccttatttttaaaggcgattggac  
ggatgaaagacaacgctctattgctgacagtatctcctctcagataaaaatcaaacgataaaaatt

aaagagagtgttgctacactacacgatatcaatacaacctcaagaatacgtagtaatcccctcc  
tgcacaaatcctcagttttatcatctccagactttttaaatgctgttaacgactttagaattt  
tctcgatatccaaggaggttctcaatttactttatgatgtcctttcaggccaaaatattgatgac  
ctttcactggcatcaaaaaccactgaaaagggttacagaattgtgcctcgaattatccataattt  
tagacgtgatccataaaaatgctttgagtttaaatgtcctgcaattacttaccocgagggga  
aacatctatggaagaaagtgggttcattggctgttgacattagacaagaaattggtagaacata  
tcagattctagcgtgaacttagtcgcacactgtcagaggcgttacaatttttcagcaacaac  
agcaacaacaacagcaacaattccaacagcagctgttacaacaacaacaggaccaacaatca  
acaacaattattacaacaacaatagaagaacaacaacggggttcaggaacagcagcaacagcag  
caaagggaccaacaacaacaggaacaacagcaaaggggaacaacagcagcaacagcagcaaaggg  
aacaacaacaacaaggggaacaacaacagcagcaacagcagcaacagagtgaccagtttcgaca  
acaattattgcaacaacagcaacaatttcagcaattactacaacaacaaggaagaagaagggg  
ggtgacgatgggtgatgaagaaagagaggaagagaaggggctgaaaaggatgattgtgtgc  
gtaaggttgcagaatcagtagcgacaaaatatactgctgacttgactaccttattccaacgaga  
agaaaataacttccaatctaaaatagcatcagcaaaattgggaacccttgtctttgccaccct  
ccttcacctatcatgaacttgacaaaattgagagaggaatattccacattcacaaccagtggt  
tttcaaaactaacagctgaaaataatagtattatgcgtattttccccgagaggattgtagaagt  
atgcaagagtaagaatctcaatttaatgggaaaatacttgtacattataactaccgcacaaaca  
gaaatggaagatcgagtgaagaatataattgtctggatattttcaatcaaattgaagagttttca  
acaatgtaaaacaacaacaacaacaagctgcttcagcttcttctactaatcctcctcctcc  
ttctactccttctactactcctcctgttacaagcatgcaagtttgtgagttggatgatcaacgt  
accctagaaaaggctgccatagtagaggcaattactctggccaatgctgtacttcaaactacaa  
aatccgcttcagctccttccacggcggctgagcgagaaattgctctaaagctagagaatgggaa  
aacatctatccgtatggaaaaagtggatctaagttcaggagctactgggtgtttccgaccaacaa  
aatggatcgacgaaagtacttccaaacaagaattggaagatttcattgcagaagaaaactttg  
tagaaactgcacataatgaaatggatattggattaattttggatgccagaagaacgatccgac  
ccgtgatgccaatcttaggctcgtgaaacctcatggaataaatgtgcagcttttcccatattac  
gtactccgcacatggctaggagaaacagatataattggatgaagatactgtacatcctgaatatt  
tccgccaatacatatgatcgcaattggaaggtggaagaacatgagcgtgaagatacattaaaggc  
actgggtgtttctttatcagatacgttggcacacatcaaggactactattctcccagtgctcaa  
aatgatgcatcaaaatcagtaccatttgcgttgaacactctattgtacaacatatttgctatcg  
acggaggaatgatttctagcctttcaagaacagcctttatttaccgtaaatttttaaggcaatc  
tatgacagataaagaggttgtcaaggacctgttcggctcaactgtgtgaagcgacaatagcg  
tctcttttcacggcatgtagtaaccttcttcgatcgtctcccttagccgataaagtagaacac  
gccttcaagaaaaattagcggccgctgctgctgtagacacgtcaaccggagacatgtttcgtat  
acgagtttgtcatctcatgtacaattttatagtggttatgtgaacctatgcaataatcgtata  
aactatacgtttaaattgattgagagcgtcgggtctggcaacaaaaaagtctgtggccggtaaaa  
caactaaagggcatacatcttcttcccaccggtttggatcttatgatgtcacatatgatttttc  
agtattgtacaagattcttcaactacaaaaacagaatatctctttacttttagagaagggtttc  
aatgcatgggaatcgtgtgttgccgccatggcagccttactgcccacccttctctctccatct  
cagatgccgaccaatccatactcttcccactagaagggggagagattgttattgaaaaacatga  
aaacgatgcagaaaaaaatgtcgatatggttcaagaattgtggaaggaaactgcactcacactc  
atggcaaaggaaactaaattcatactacaactggttcatatacagtaaggataccgatatggaaa  
agttggcgagagtggtgcaggatgattatcgggtatagtttaaggctgttctcagattaacaataa

agccgagagtttagtagacactaatgctctttctgatattttcaagctacctgtgattccaatt  
gatgataccaaaactctggcaataaatattgtggtgttcactttgaataatgtaattaaacat  
ggatgggttcggttcaagcaaagtttagacagaaagacgggggagtttcttcagcctatttctc  
gtttcaaaatatccaacaacaaaacatcaacaaactgcttccatttttagatgcatgggcttgc  
gccccggtaagttaacaaaggcagcacacgtgtttatcaggatatgaaaatcatatcaaat  
taaaaaagatgatcttttatggggtgcttcaatgaaattccctgccgacggacgagggactgt  
ggtcgaaggatgggcccacaatacaataacgaaagcgtattggaagattttaccgacttttca  
attgaagtaaacgcacctgcctctggactcttaataccgccagatcctttactttcttccatgt  
tcggtaaaggaaatgggtggaagcagcagcagcagcagcaaggataatacaattattggaaggg  
aggattaatttttaaccgccaagtgtgtggacaagaacaagcaccaccaataaacacgtcgtcg  
gatactaaaaaataagacgtgatgcaaatattgaaccaataatagggacgccttatagtgtaa  
ttaaggcaagtaaggagatcaatttcagtactggatgatttcaatgaggatagtccagaaga  
tttcgcccttaaaaacttccatcatcaatgatgccatacgagaaatagggcaacgcatgacttat  
acaagacctatatttgatcatcaaacacagaaaaatatacactacagttcacctaaaattattc  
tcgaaggatcagatttaagaatggacaacgttcaggacaatcttgggctccttcttcatc  
cttgactctggcctccgattggaatctaccttctctggagcttttatatagagaacttgccaca  
aaacaagtagagaaggagaagaagaaaagagcgaagggaagaagataaaggacaaaactta  
atgaaaaattatcatttgcgtgaataaagctatcggaaactatccaacaacaacatcaatattc  
tgaaaggggaggaggaatgaagaggtatcagcaacactctgctgatcaagctagtaatgggtggc  
atagatgatatagaacttatgaatagtaaagatgctacttccatgagaaaggcaaaactggcat  
tagccgttactaataaaaattgcagcagcagcagcaagggatggggaaaattcatcagctaaacc  
gtcaaactttggcaatagattggatgaagcaataaacctggagcacttttattacgtagagga  
ggaggagtaagaggaggacaaacaccccagagttcaatgctaacaatgttccgctcctggacaaa  
ctggtggcaatagtagttggtggactactaatacacccttattcaacgcacaactagtgttgg  
gaataatttagttgtgcttgtacccaacctattggattcacaccctcctacatttaattaggaa  
taaggaattatacacatttatttgtatgttttacatgtattttattcaacaataaaggttatga  
tcatacataatcaactggttgttttattacatagtttccattactgacccttccaaaaatgaat  
tttgtacctccgaatacaatttcttccctcggtttacaaggaaattgcacggagcgaatctgc  
tcaccattcaccaacaacaccctcattaatcttcccatgagtgatgtgaggattcagctcgtt  
gtcagcaggttcaacatttctccctattgcatctgaaatgtgttccattattcgtctacgcaa  
tcgagtgcatcatctccaacacatacttggatacgagaatgttgttgttcatcccaacaact  
caaaattatccccagtgctgattttgatagctgggtgcaaaacaactcccaaaatctgttttcat  
cagagtattgtattcttccatatttcgcaaatagaaaacagaaatggtcacatgtggaggcaac  
tgagaaaatgatttggagacgtgttctcagataataattttcccgtttctgaatagaaaggaa  
gtaactcttcgctgtagagagcaagaacattttcatttcttcacctttaaactcaacttgatt  
tatagtgaagattctattgttgtgtttgattgaaaattgtttcaccacttcaaacatgccattg  
atttgtttgtacatttgccttgactgcgcactcttcttgcacctgtggttgagtagatgaagggg  
agatttgggtggccattatctgggtgggtatccattcaatatgttgtagccggcacaagggataac  
tgggtccacaaaacttgaaagcctctctattaaaccctctccctagaggaataagtccacaacga  
atttcgtctgcgtcttctgccttgtccattaacatcatatttagatgcacaacatattcagaa  
tccattcaagggtgtgttttctggatagaggcaataacatcatccacatattccccatctac  
ataaagtccagtaacaacaatctttaacgcttttagataaaacaatagtttctctatgagaaaat  
attgccttgtttactttgggtggagagttgttcgtcactgggaatgggctgtagaggccaagagta  
gagccttggaggaaaatttcttgtccataggaagtctgtgccgatattgtctacatgttaga

catagaagtattatcactaaagtcaaagaagactactccatTTTTctggagagggTTTTgttgaag  
gatagatgTtcttccatggTggtggtggtggtggtgtgatggTtTgaatgaggtgtggtacagtca  
ttatatacacgtgggccctTTTTaaaaggggggagggaggggggagagggTtgcacatcaagcaata  
tcttcgtccagaaacacctggTccagaaatggccataagatacttccctctatttctggagctat  
tacatttctggTgtaatctgacattggcccgaccagaggtccaccctcggaacttgacattcg  
gtcgagctagcggtccaccccctaaactggagcgaccctaaaaaattTTTTgaaaagTtTTTgag  
atggaggaagagTaaaattctctagtgaaaacagaagggtataccctctcatttctgggtcgac  
cagtctccagaaacgcctgTtccagaaacacacaaaagTtaatgtacgttTctggagctattac  
atttctggTgtaatctgacattggcccgaccagcggtccaccctcggaacttgacattcggtc  
gagctagcggtccaccccctaaactggagTgacctgaaaaaattTTTTgaaaagTtTTTgagata  
gaggaagagTaaaattctctagtgaaaacagaaggTtataccctctcatttctgggtcgaccag  
tctccagaaacgcctgTtccagaaacacacaaaagTtaatgtacgttTctggaaccaacaattt  
ctggTgtaatctgacattggcccgaccagaggtccaccctcggaacttgacattcggtcgagc  
tagcggtccaccccctaaactcgagTgacctgaaaaaattTctgaaaagTtTTTgagattgaag  
aggagTaaaaaactcactatatgaaaggTgtgtagaacaccacatccttTctagggcagggccat  
gtccagaaacgcctgTtccagaaacacgcaaaagTtaatgtacgttTctggagctattacattt  
ctggTgtaatctgacattggcccgaccagaggtccaccctccgaacttgacattcggtcgagc  
tagcggtccaccccctaaactcgagcgaccctaaaaaattTTTTgaaaagTtTTTgagatggagT  
aagagTaaaattctctagtgaaaacagaaggTtataccccacctTTTTctggatgcgactagatc  
cagaaacgtatgTtccagaaatacccataagTccttTctctatttctggaaccaaccatttct  
ggTgtaatctgacattggcccgaccagaggtccaccctcggaacttgacattcggtcgagcta  
gcggtccaccccctaaactcgagcgaccctaaaaaattTTTTgaaaagTtTTTgagatggaggaa  
gagTaaaattTcttgctgaaaggTgtccagaagTgTaaacacacacacgcatttctcgcacctt  
gtcaccatcattaataaaaaatgtcccctcccgtccccctcaaaatcgggtataaatagagc  
tcaccagcacaccacagacatcattctcaagacatttcaagtactgagaacatcctctcctctt  
gtgatattattcaagaaaacctactgaaatcgTccctaaaatggattTTTgaaaggaactaccagt  
tctaccccctcaaaaatgtcccagTtgtattcatcagTgaagaaagTtgcagagcattccttTg  
ccaatcttcatgacaaggTtactcttgcatcaaaggTtattaaggacctggaaggggagaggaa  
gaaaatgtctacccc aaagTcctcttctgatggacaaaactggacaaggctatgTtggacgat  
attatcaacgagTatcaggccgTtaagagcactgcagataattccattgaatcgaccatcaagg  
aaattgaaaatgtacttgaagTgtgTgcgcagaaccaagattgaaagTgaagccaagaacagTgt  
aacttccagcccagaaaaagTgttTctgtcgaggatttagaaatctactccaagggcgagTg  
tgcaaaggTctcaagTtaaacgccaactgTtcaagaattggaggcaagTatgcagTgtcaatga  
gtatcaaaaaacacaacgtctcctcatttggagaacaacaaccaagTtTctctgaagaacc  
cagggattgTTTTatgcttgaacaacctatcctcttgttgggttcgaaacttctacagaagat  
ggaaatacatatgcagTtTcttTgactggTgttgggctagaaagatctctacctaaatatgtac  
cagTtTctgacatgaatgcaggtattcaaacctaaacatgactggTtTgaggatggccaagct  
tctgttctgtgcatgTtTggacgtacagaatatgacaacttggaaagattTTTtacatcacttca  
attgagacgcagTctTtTgacgaagaggaaaatgatgccagaatgaggtgtcacaccgaagatt  
tggagaggaagaagcgcTaatgacgcaccagcgattacacctcatgtggccgtgtacgacta  
cagTggagacgggaaagaacaattgctctatatgataaccgagTatgaaaacacggctagTtgg  
tgcaacgcaaacggTgtggtcacatctgacagTggattTtctaacgaatgtgcaattagTgata  
tgaatgacttgtgctgTtTtTgctgactgcatcgatgttactgttaataatgaagaacatgaaga  
acgttctatgaaatattgtggtcgaatctgacagggcgtctTTTTgatgctagTccttcccccatc

aagacggaagaagatggagaaaattcatcgtcatcgtcttctctccaacagttcctcctccta  
caccatacgaaggtaacgcagttgtggagggggaggaagaagaggaagaattgatgaagacga  
aagtagcaagtatgaaggttcagaagatgctcttggtatgaagaaattagccaagctttctact  
atgaaacaaatgagaagggttaagaatgaacctgcactcaaaattacttctgggggtaacaata  
gtagcagtagtatcaataacgaagatgatgggtgatgatgacgatgccgttgacgctactgcatt  
atgccccaaactgaagctacagtgaaaaattccttcatggcccaaacgacgagagaactgaa  
aatatgtgtatgaaactatgcaaaattctcttgctaaaatttgtaataatccatcatctatga  
gcagttaccgtgtattcaccaacaaactccaagagtgtttgaataccatggacgatagtatccg  
tcgccgtccaaccatttgactgaagaaagtcaacaatttgctaagggtttgttgtttgatgag  
gttgtcacatcaattgtggcacatcagatggctcaagatatttgcaagtctgaaatatgtggag  
gaatgtttaacgccaactctaccaacattaagggtaaatatgaaggacaaaagaagagtctgta  
tggaacaagcacatttcttctcgtgcttcaaaaccaacacggaatctaagtgaataatgca  
ctatgtcgtgggtgaaatcgaaactccattctggcacagtcatacctaacgtattctccttca  
aatggcatcagaaaagccctcaaaaatgaagcgcaagcgtacctctagtgttcatcatctaa  
cgatgaacaccaagaacctcaacaaaaatgatgaaaaatgatgaaggggaaaaggtgcacaa  
gaatcatcatctccttcttcatcgtctacaccagaacaacaacaagctggctcatgacaagg  
aaactatcaatttaattcccctcagtttcataaaaatgccacgcagtaatgtcaatggctcggc  
ttcatatgtctgaaatatcgggtcaacgtcttggactgtctgatgcttccagcacattt  
aagagaatgtgcaagacttttgaagatcttgaaaatgaaatcatgaggagctcattcactagac  
tgactagatatgagagggaggtaactcgcttgatgagaaatgcaggtctcaagctgtagatat  
tgaggaaaatgaaatggatgttttgtctcaccaaggggaattgtttgccgagttcttggaggac  
ccgatcgcttactttgaagaagtaactggagaatattaagagttggagcctagaaaacgttaaca  
cccctaagcgcaaaaacaagtatgcaaaggtactgggtgagcgttaatgctattcgtaggacata  
tgaagaataccatgctgttagcaagtttgtaccaatgttcttgttcaatctgattaagagagaa  
ttggaaggagacaactatacccatgacgttcaactttcttccacttgctgtggtacctgactg  
taatgaccaggaacaggatgttgcgatgtgctccagtcacatcaacaacaacaataatgataacga  
agaaaccgatattgtggaggaagaggaggaaggagaaggagaggagataaaaatggaagaaagt  
atggacgtagaacaacagaagcaagttcgcaagggaggagagaagaagggtcaaaaattcaaca  
gtattggggatcaagtcattagaaaatttgtgaaaagtttgtgtgaaaattcgatggtagtttc  
tattgcaattaatagtttgatctctggaataagctggatgaacaagaaaatcccctcccggtttc  
ttgaaggattctagcacaatcaatacccttgatgaggtctcaaggtttgtgttttagcgatgtca  
aatcaataggaaaatcaatggaacagatgataaatatgaaactgtttttggagtcagtacgcg  
tgtggattcacatattgtaggccccctttagtatacctgttgatttttcaagcgcaggactagat  
aaggcctcatgtggcaaattgtacgttaacaccatagacggaaagggcattttgacaatttcac  
ccaaatatgattcattaacgatgaggatgttgattctactacaacagacaagctagagaagga  
tattttgcatttcttaagcatgacaccttttcaatattaataagaataaggttccttccattc  
tataatatttctcctagctcttctctcactgaaaagaaaaagacaaaattcaataggaagaaga  
tctcatctggatgagcaataataatggcatgtgtgtacaaactccttctagttcaaattcagt  
ctcttccgtctcgtctattgtagctccttcatcttctgttctggctctatcttgctccctttct  
tctacaaagaaaaagagcatctggaacgagaacatgtttttgacatctaggaacatgtggaggt  
gtggatgttgtgtaccaccaaaactttgcagttttattgttaacatagacacgctgtaaaact  
tgtagctgaaactgcacctaaaacaaagtgtgttaggaatattattgataggaataggaagatt  
agatttaacgggtctaaagaaggtatgcaagagtgttagcgcctttaccggcgagtctacatatt  
tgctcaataagaatatgactgcaacttcacctagtgtatttgaacctatgtatttatacttcatc



tttaa atg accc attgt ata cttgt a aa ttg accc attga ag agt acc agg acg gaa atg ctttg  
gat g act at ggt g cag ttttt gtaa actata c attta ag agt at caaat cct gct cgt cca ag  
at gaa acc gct gac gaca at gct gct gct gct gat gat ggt tct act act tct act cct cttc  
ttca act gata ct gat gct gct gca atcca ag act ttt at gcat gta at gatta agaaa attgat  
gcc at gaa ag ac attag ag gaa agtaca agaa atcttt ggcaa agaaa caa ag aag cattaa  
tgtata cctttt attttt acca ata aaaa attata t gtttt acat gttt gtttt tatt caa attca  
tat ggtt catcccc atttaaat cgt cta acccc atatccc agtcaa acgct gct gct gct gct g  
ctggtt caatgtct g agcc atag atgg attc attg acat ctaaa agttc atctctaaa atttcc  
tgg t gtag cgggttg acg aata attggt gcaataaat gcctcctcttcttcttcttcttcttcttctt  
ctgactccc gtttcttg acagcttg acgttgc gctttttattatctcttcaacg ttcctcctg  
gagtagcggg agga agatcaaaa tca actgcca agctc ag agtctata t cag taa agg acat  
atc agtagcgttttcttcttctgctcctt gctgtag acgg ag gagg agga agagg agtag gcttgggt  
aga actggtgtag gttgg aggtt gagg ggtag taga acg ag agtcaa atctt acacg gga atag  
gtgg aga agg agc agtatt aggtat agg ag gagg ag gagg ggg gactaga aatg agttg aaccg  
aa agggctgctgctgctgctgctgctggg ag gagg aatatt actgggtg attg ttg ttgagg agta  
ggggg ag gagg aatatt attggg cggctgtggtggtt gctgctgctgctgctgctgctgctgctgctgct  
gaggcggcggctgtgattggttgcctaaaa agtac agcgggtactg ttg ttgta attg ttgagg  
agcatatgggttata actggttata ttgata aatagg attta agtatccttggta agtaggt  
tgttgaacctggaa aggtgcctgtgggtgg agga agagg aaggg aggg gttggaa agggggaa  
attg ttg  
at taa atg cttg acttg tttcctcc actgc actctttatc attttttca accgg tcttgctgaa  
gctc ttg ctaaa acacc agctgc acatttctcc agcatgg agataga atgctctg atttactcc  
tcatcccc tcca accaaa agatcc atagtc gatgac atttttacc cacag ttattattt at  
agctctaaa ata acg aggtattgat aggcc acgtac agtggc gttag agttatcaga agctaca  
gata caaa attcttat caa agttcttg ttcggta atatac gtgtacca aacagg ttattacaca  
cagtag caag ttgtt caa agtata ct cgttctttcac agttc gctgtata c gatcctccac gat  
actgctc attaa attg tttatctctg ttgc atttcc atcgtta agag atttca atatttttgaa  
ctta attcttg cca ctgaa tctctcctg accgtata tctttcctatgg gaa attgcca acaac  
tattag ccaga agagctttc acca attc agc accc acatttgtgaca caaaa agt gttt gttct  
ttttcctccga actttttcttccc ttg ttcag atgaca aatag atgat ga agtag gaaa agcc  
ttgg ttttatttggcctttaa aagg tt agctaaa agag accttattctg t actgtat agccttct  
ccttg accactg cctcgtctgcca agtatg acacg taatcgtattgtggcgc attttc actcct  
tacac taaa atag agccc gaag ttatag cacctctca atgg tgcg agac acggtcatc attttt  
ccagc agg cactg cta atgcctttg attctgtgtc acttctcttcttcttcttcttcttcttcttct  
atatgtgctttttc attt gttttgccc gcttc gatac agatg tagtaggtg taacatg ttctg t  
ttca acattctcctcttcttctcctctccatctttttcttcttcttcttcttcttcttcttcttcttcc  
ttttcttccc gctgctg ttcctccccttccccttccctcttcttcttcttcttcttcttcttcttcttct  
ctcctcctcttccacc acttcttg atc agtgtctctttttccctcatc attttctaa atctga  
aca atcgcc agca cacaa atcgcc actccttg acaga attttact agtac ga atcttac gcctt  
tgct attctt actaga agttggcgcgtcca atttag agac cctcctg acccatg tttctg ttgga  
atctgg attcggcgtc atcctcctttttctg ttgttgg ttccta attata t gcttttttaa agc  
agtatt aggtttatg ttt aggtggcatattt gta aggtgggataaac attaca agaaa caaaa  
atattca agac attattttattttgt aggcaccgctg ttttag tatgtacat caaattcaaac  
catcttcc attac atata tctca atctcttcttcttcttcttctcctcctcctctttgtttggacaaata

actatcactacatTTTTCTTAAAGCTAGACAACATAGAGTACAATTATACACCTTTCTAAAGCA  
GCCTTTGTAGACTTACAATCAGAATACAATAGTTTATGGTCAATTAGTATATGGTCAGGGTTAG  
TTATTTTCATCTTACATATCCAACAAAAAAGTGTAGGGTACCCATCTCTTCTACCGCTACAATC  
ATAACAAGTCATGGTAACATCCACCTAATTTTATGTTAGGTGTCTTACATTTAGGGCATT  
ACAGTCTTAATTTCTGTCTTCTTCTCAACCTTCCATTCTAATGTCCTCTTTTCATCCACAG  
TGAACACTGGATCCTTTATTGATTCAGATGTCATGTTTTGACGTACAATATTTACCTGTTAAC  
AATTTCCATTTTTGCACCTGGTTAGGTCTGATACCCGATAAGGCACGCCTATCTACACAATGA  
AGGACAAAAGAAATGGGCTCTATGGAACACACATTCTGGCCGCTCCAACACCATTTCCCTATAA  
GATCTTGACAAACATTTTCGCCATAATCCTAATGCACTCTCATGGTTCAATTTTTCATAGAC  
ATAAAAATAGGTTGCAATTAGAGGTATACTCACACCTACAACCTGTTCAAAATCTCTATCATCA  
AAACCCCAAAAAACTGTTAAGTAATGGACTTTAACCTATTCTGAAACCTCTCCCTGGTGT  
TGTGGATTACAGATATGTCGTTGAGAAGCCCTTCATATTCTCTGGCATAACGATCAGTCGAGTG  
CCAGTTGGCTAGCGCTAGAAGAACCTTGCCTCCGGAGACTCTGGGTTCCATCTCGAATCTTC  
TTTTCGGGAGTTCTTTTTAGTATAGAAACAGCCTGCCTACAATTTGTCACCTCTTCATTTGGAG  
GTACAAAATTTGACGCCAAGAAACCGCAGGACAATCTCATGGGCCATTTATGGAGTCCGGGACC  
AGTATCATATCTTACTAGTCTCATCGGTGGGAGGGTCAACAAATCAGCATCTTCTACATCCTGG  
AAGTAATAGTCTTCCAGTTGTTCCGGGAGGAGGGTACGGCAATACTGGAGGAGGTACATCCACTG  
TTACAATGTCTTCCATCTCATTAGGCTGGTCACATACATTGGGTAGTAAACACTGGGTACAGAT  
CAGGGAACATTTGCTATCACCAGTTTCTCCCTCCACCATCTTAAAGAGTTTAAACGGGCGGTCTG  
AATCTATTATCCACCACAGTAAATTTGAATCCTTGTCTAGTGCAAAGTCTTGTCCATCTTAC  
ACATCTCCATGAATTCGGCCTGAAGAAGTTCACAGTATAGAAGCATTCTCTGCTCGCTTGAT  
GAGTTCGGTGTATGAGAAGTTTGTGGCTGCAATGTATTCTGGGTGCACATTTTCTCCTGCTAAA  
ATCGCCCTCTCGAATAAAGATGAAAATTCGTGACATCTACCTATAAACTGTACCATATATTCTC  
CACAACATGGGCACCTAAAAACGTCCTTTAGTTTTCTACTACCAGCCGAGACCTTTTCTGACAC  
ATACATTAGGTGTTTTATAGTACAATCAGGGCATAGTTTTGCAGAACACGTTTTCTGTCTGTCT  
TCAAAAGTGTCCATGAAAGCATGTACGGGGAAATAATCGTAAAGGGCTTTCATGTTTTCATGAG  
AACAGTTGAAGAATTTTGGTTTCATGTCCAAATCCGCGTAGCACAAACCACATGTTTTATTGGT  
GGTATTTCCACTCAATATCTTTGTAACGTGTGCTTGTATTACCTCCACTTCGTCAGATGGTTGG  
TACACCATCGCCGCTTGACTTCTCCCAAGACTCTTCTTGCAGTGTCTGGCTAACCATGCATT  
TGGCGATTGCTTCTTCTAGATGCATATTTTCAGCGTTTTTCATGTTTCGAGGATGAAAGATCCTAG  
TTTTCTGGCTGAAGGTATGCCGTGTCTAGATACCAGGGACAGTGGTGTATTTTCTAAGAGCGAA  
GCGTTCGGGGAGATTATTAGACCAGAAGGCGACATTACGGATTTCTTTGGCTCCTCTACTCTT  
CAGTATCTGCTGCCAAAAGATAGGGAACATTGTAGATAGAGTATCTGTACACTATATCAATCAT  
CTTGGCTATTTTTGTTCCAAAAGAATATGGTGTAAATCTTGGGGCACATATTCATAGCGTCA  
TACACGGGCCTGGCAGCGTACATGCGAAGATGACCCTTATTGTAGTGGTTGTTGGTGGATGGAC  
CACTTAAAAATGCTTCTGTACGGAGAAGGCCATATTTTCCAAATCCTGTCATTGTTTCTTCC  
TTCATGCATATCAGAACCAATAAAACACTAAACGTTCTAGCGTCTCTTATTTTTGTCCCCACT  
TGAAAAGCAGAGAAGGGCCACATGTACCCTCCTTATGAAACACATCCTTCAAAGTGTTGAGAG  
AACTACCACATCTTCATAAATGACACTTTTCATGTGGCGGTGCTTCTTGTCTGATCTCGTTT  
GATGGCAACAAGGAGTAAGAAAATGCGTATCAAAATCCATATCTGATATCATCTCGGCGTACGCC  
TCACACAACGCATTTCTCTCCTCCACTGCATCGCTGCATTTCCACGTATAAATTCATCCAACA  
TCAAGCGCGTATTTTTCATGACAAACATGCCACTATAAATACGATGAATTAGATCCTTGTATGC  
TGGCCCATCTTGTTTTTTGCAACTCTTTAAATGTCCAATGAATCTTGTTCGTTTTGGTCAAGA  
GTTGTAATGGAACTGGGTCTGCTGTTACTTTTTCATCTTGATGTTTCATGTCGAGGGCTTTCTTCA

ttaatagagatatctctttcaaaagaccggttggattaatcacaactgtttctccctccaaaag  
ttcatccctataagaattgcggttgagatgtccagtatggcctccagaagatcaccactttct  
cccactatacccacaattcgttcataggtggacctcttattattctgcctcccattaggtcgg  
tgatcaagattgcaacttctgggacagcagctgcaactatggatggttacaccttccatggtgaa  
cgaggggaatgaatgcgataaagtctggggcctccatcttatatacccttcagatgtgaaaaaa  
acaacatgaggaaaaaagtaaaaaattcaatatacatgtatgtctttattggctaggaagaaca  
catttcacaagcaccagggttattgatagaacataaaagagcagcagcaggatctggaacaaca  
atagaggacttcttctcctcttcttcttctcggacaggagcagaaaaagctgcaacaggagagg  
gagcttcccttcttgacttcttggagtacattcttgtcgcactgtgaaactggacagctctagctgc  
gccctttgtgcgtagataatagagagtcttgatcccccttctcccatgcatacatagtcattgac  
cgcaccttgctgagttcgggttcttccacaaacaagttgagggattgagcttggccaacaaca  
tacctctctgaatagccatgtccaaagtagtacgaggattaatttccatacagttttgaatag  
ttccttggctcgatttagggatattaggaagcgtctgaatagatccaccacttgccataatcctc  
tgtttagttactgaattccattctcccagttttatgagctctctaatacatatctcgttcacca  
cttggaatgatcctgaaagtacattacgattatacatgttggacggttaaaggctcaaaggattc  
agagttgccaggatctgtgcagtggtgcagtaggcagggagcaacaacattgaattgtga  
acaccatacttcataatgtcccttctcaattgctcccaatcgtgaattggcaagagttgaaat  
atatgtccctattcttaataatcttccctccccatgtcaaattggaaaatccctttgctcaaagg  
actaccctcaaacagctcatatgtttctcccttttcttggcaatttcacatgaagcttccaag  
gcaccatagtatatagtttcaaaaatcctcttgtaattagtgccgcttcttcagattcgaagg  
ggattctgagtttgaagaacaaatctgctagtcctgcacaccaatcccattggcctagtttt  
catattggaaatgcggttcttgtcaactgcatagaaattgacatcaatcaccttgtcagatatt  
ctggctcatgatttttacaacctcttcatctcccggtaatcaacatagggccttaggggaaggga  
tgggagaatacttcacaaacttgttgactgcgatagaagccaaattgcacactgcagtttctc  
cgaatcactgtactggacaatttcagtgcaaaatttgaagacttgatgatgccgacattttct  
tggttagactttctattgatggtatccttaaagcacacataaggtggtccagtttcgatacgtg  
cagaattaatttggctgaataatgcacgtgccttcaccacctctttacctttgccttcagcctc  
atatttctcgtacaacgccttaaaactcttcgccatggacgtcggaaaggccagggcactcgtgg  
gggcacatcagggaccaattcttcccagccttactctctccatgaagagatcagataccaga  
tagctgggaaaagatccctcgtcctcaaatcttcattaccggcattctttctgcagtcaataaa  
gtccttcacgtccagatgccaatcagaaatatagatggctgcagctcctctcctcttgtctcct  
ccctggctaacctttttcacagagacgttaaagatttggaggaacgccatgagaccaggggtggg  
taccactccatgacgaaatggggcttcccttttgccctcaaatcatgaaagtggatgccgagtc  
tccagcagcttggagatgattgccgctccttaagagatcataaataccctcaatgctatca  
tcttgaaggcccagaaggaagcacgaggaagttgggggtgtgactgttccacaattaaacagtg  
tgggggaagcatgggtaaaatagtgccctcgacatgagatcatatgtttcaatgacagatttgat  
gtctgatccgtgaatgccgacagccacacgcataatcatgtcctgagggcgtcaaccaagatt  
ctcttcttctatcagtgggggaaccaatcttgatcaataagagtattctagcgtcctcagtc  
cgaaacaggtgaagagataatccatcttgaatcgataacagcatcgagaatttcagcattggc  
cataacatcttcatagtaggtatcattaactactgatgctggtttaccagttccaggggtggatt  
gctgcctcaatttctgagttggtgcaactaaaactattccactctttgggtgtttttgtggatgt  
tcgaacagatgaatcttctcctgccagttttccaaaatcaggggtggtcaacaatttttgccttgc  
ataatcggccagaaaatcgtccatttcttgggaaggagatggtagcgggaagacgggtccatgatg  
tgagatgcaagttcttgaggggttaattgcgttcttgtcaagcttggggcacatactgggtgactg

gaagacaggcattttcaatcctcttgattatcttttcaagactaatttcttgcttagtgccatt  
cctctttgagatgaatgattggtgctggtagaaccattttatggtattaaattgggatggtg  
ttatttggagatatttctctatacgtcttctcggtcgcgaggagggtgaaagatgtgagtgaaag  
gcttggacggtagctgtatttataccggccccgggtgaaggctcgtggatatttttgaaggagggg  
aagaaatatatagattatacgtagttctttgatgtagaagaaatcagaaggtagggtgacag  
ctgctgctgctgcagtagtagtgaggtgcaaaaactgttctcaaaaactttttaaaaatt  
tttctggatcactcaggttaggggggtggaccgctgtctaggcctgatgtcaagttccgagggg  
ggaccgctgggtcgaccaatgtcagattgcaccagaaccgactggtgctccagaaatgtgcat  
taacctttgtgtgtttctggaacagacgtttctgggcatagctgcgccagaaaggggaagggtg  
aacatactgttttcgtatagaattttactcttctcactctcacaaaattttgaaaaattttt  
ctgggtcactccagtttaggggggtggaccgctgactaggcctgatgtcaagttcggaggggtgga  
ccgctgggtcgggccaatgtcagattgcaccagaaccgactggtgctccagaaacgtacattaa  
cctttgcgtgtttctggaacaggcgtttctgggcatagctgcgccagaaaggggaaggctgtat  
cttactgttttctgtagagaattttactctttctcctctcacaaaattttgaaaaatttttct  
gggtcactccagtttaggggggtggaccgctgggtcgaccaatgtcaagttcggaggggtggacc  
gctgggtcgggccaatgtcagattgcaccagaaccggaatagctccagaaatgtgcattaactt  
ttgtgtgtttctggacaagtcgtttctggtctaggaggcaactagaaatataagcttgtagcct  
agaatttagtacaccaaggataaagaaatataacaaataccatactatgttttatttgagtaat  
atagtatccaagttaaaataacaatcacgcacttgtagcattaatagctctgtaaaagatgggcaa  
acgtacacctgagagtagtattgtcccgacaatcgtacatgaaccctctagtgacgtatcacgttt  
tcgccctattaccattgatgcacaaatttctccttctcattctaatagaggcagattgtttgtca  
aaataacactccctatagtaacaaccaggatttccattggattgacactgtagttgttcgaacg  
gttttctgtataacatttcccagctgcgtggtagtgacgcacaaaactcatgcaagaatgtgc  
gtgggtagtttctttctaaagaatctcccacgcactagaggcacagaaaaaatcaactgctgctg  
tggcagtgacgcacggccacacaccgcattcttcacaccataaaaggacatgattcgtgttag  
tcgtcacatctctcagaaacccccatgtgcattgacgtcatggggaattgctattgcaccacct  
tatgggtgataaaaagtggccctgggtggcatcggtttagtagacagaaacaaaccgtcaagatgg  
tgctgctattaccacctctctctgttgttcgtcgtggctgtagtagcttccgctcgtttttac  
aactgaaggagctagtgtagagtgaaacgggtgtgctgtagcccggtgccccgacgttattgac  
cccgaccaccgctgccaagggcgactgtgcccgcaggctactcgaggaggtagcagcagcagc  
acgatgacgatggaggaactttcgatacagtaggggtctggtatacttggacgcaaaaagcgtgc  
cgcacctccacctgaggatgaagaagaggatgatttctaccgcaaaaagcgtgccgcacctcca  
cctgaggatgaagaagaggatgatttctaccgcaaaaagcgtgccgcacctccacctgaggatg  
aagaagaggatgatttctaccgcaaaaagcgtgccgcacctccacctgaggatgaagaagaggat  
tgatttctaccgcaaaaagcgtgccgcacctccacctgaggatgaagaagaggatgatttctac  
cgcaaaaagcgtgccgcacctccacctgaggatgaagaagaggatgatttctaccgcaaaaagc  
gttaaactacgcacgaaagtgcggtgggtgaagaatagactaatattgttgatattgtaacc  
cttttttcatgaaatgtgtacacacctgctatatatacgtgcatatttgaataaggaataaag  
ttatctgcatctgtatttttttattagtagtctttttgtgggataaataatcggattttgtgt  
caaagatagtggtgccatgatgccatatacaaacgcgtgatactttccaagaagcagagtcg  
tatgaccattgacgtcaatgcgtgggcagaggcggagggtggtgataaacggttctgagaaaca  
ttgggcgtatgacgtcaactacattattcttctcctcctcctcctcctattgcctctgccagttca  
gtattttatttttcttctatacaataaaaagtatcagatgaatatttttactgtttttctgtt  
catccctctttcctattgtaaaaaaaccaataactaactaatcatggataacttgaaaggggaa

tttgttgcgcttaaaacagacctcaccattacaaaacacagttggatagatctatattggtat  
ttgttgatgttggttagattatatgttatagtaaatagtgaacaaacagctaaaaaggaagg  
tctagcaactagagtggcaaagcaagccacagagatacaacaattcaaggacgaaataaacaac  
aatataatgctctaacaataacttttgatgatatcatctacatTTTTgatcatggaggagggt  
tcaaagagcaaaacataaggccataattgaagcgaggaataactctaaaccgctgagggatt  
agagtgcattgtttacgcgtatagcggacatgttaacctgactTTTTatgactgtgtacaccaat  
atcattactgaatttagacactctagtgaacaagccactaatagtataaatgtcaccctcggac  
gtcttttcttgtgtgacgacttgtgcaatcaattaccaaagaagaggaagaagaggaagatt  
gaaacagaaattcattactttccatgCGAACCTatacatgctggacacacgcctaaagaaagat  
ttgataattttcaaagatgtcatacaacaacttcacgtgattttgcaaaaggatacctatgctg  
taaaagaagggtgtggccattagatgtgCGAACAGATgaacgaaataagtcaatacagggacaa  
cctcaaggataattacaatacattttcaaacattttgaaatggtctacatTTTTgatcac  
gggggacattttgaagaagtaaaacacaaagccataactctgactagaaattacttgaaaacac  
tcatgggattaaaatgcatgttcaaacgcataatccgaaatggtgtcattgactTTTTctaacagt  
gtacactaatgttatagcagaatttataaacgctagcaatatttctgatagagagatcaataat  
tatcttgtccaacttgaacatgtaacgaattgtgcaaccaactccccaaacctaacaataacc  
gtcccctcagtttgatagataacatagcttatttttctcttctgtccaaaaacatctgagtg  
gttcttttagtatgtggagtattattgtcttgaagctcataagtattcaacctctcctactgg  
aacatctctcctctctataatcccaatatggatagttgttgctgatatcgaggataacacca  
gaactggctggcaagttaacctggatcttcataccagaaaacaacttcaagattgtccagaact  
cactcccagacgaccaagttatctcccaattcagatatttcgaccatagacattgctatacgtt  
tatggagattttgatggcaaacattaaaatccaagacaggaaacaaaacaccacagccatagt  
gaattgacaactggaagagaaggacttttatgtagaagaaccatacctgtatttttggttcag  
aggaaaaacgagaagagttattggggaatctccctgaaggtgcagaaattttcaggcctagaga  
agttatgcaagtaattggtactctcttgacaagaaactagaaattgacgacggtatagcttct  
gtaaaggctgccctctgtgctggttcatcatcgttatacctaatacatgagccacatagtgaaaa  
tgaccttttctgctatcacaacatgaaggatataaacgagaataatttcgtagactttatatt  
tcgtcataaacaattcctcaacctgaattcttcaagcaccttataatctttgctcaagaattcc  
aggaaggaacatgttgccatctagtaagacgtctagaacactttctcatgctatggaccctt  
ccaagatgaggttcacagaaatggaagaaaactacttcccaatctccagcgatagtgattacgg  
catctgtgaaaaatgtgcacgaaaaactcccaatacaagctccgtatttttagggaaacgaaaa  
tgctgcgatagatgttgccgtctttatcacaacaaccgcctccggagggtgtataattgggatg  
gaaaaataaccacaataccaataaaggctacattaatgcaggcgatgaaattatcggcatgct  
aaactcaaatgataagggaaaaacattccctcctatacctaagatggtgtacgaagagtggg  
gacgggtgtctacgggcaaggaactatcctgtcaaagattttgaagttcaggcaggcaaatatcc  
ccacgtgtctattcgtgacatgcaataaatgcaataggattttcaggctcactatcttagggcc  
tacaagaacatcctttgccaccttgcaaaaagaaaagtgttgagtaatacacaacagaaa  
ggagaaaaataaaccttcgtttgcaaaaaggaacaaaacgtctacgagtggataccggtagca  
acaagaacacggttagaaaaattctgttctgggaaagattcaatactgaagttttgctccctg  
gcttggtacactattgagtctaagtggcagaactgggaatcttttctgggttattcgagtacc  
agatataaggaactgtgggccttctgtgaacaaacaggaaatatcttccatgaaagactcctaca  
taaaaattgaagacatcgaccagttattgaggagtatcttgcaagaccagaagggtgtatttga  
gaccgtctgcaaaaataaagagcagagatggtttgtgaattggccacactgattccgataccgac  
taaaaaggctgattgatggcaacccccccccctccagactcagccgcatgagtataaataatggc

cacttctcacaccacagcatcattccctcgtcatcggtcctaccgtcaacttccattattactc  
caataataccaacaaccccagaaatggagtcaatcaaactgttcaccggttgctggctgaatat  
ggagcaagccaaccaagtggctgaagaaatcaagtcagaatataaaaccgaggaggaaaagagg  
attgcccaggaagtgtttgacaaattcaccaaaaaactcattatgcaagtagatacgtctaaac  
acttacttacaagagaaaacccaaccgttttgatcccgccccattgtccatgaagatctctg  
ggaaatgtacaaaaagagggttgctgtttttggacattggaagagattgatttcgaaagggat  
cctaaagattgggagaaactcactcaagatgagaaggatttcattctccagattctggcgttct  
ttgcatcctctgacggaattgtaattgaaaatcttacaacacgtcttcgtcaagtggcgcagat  
tcagaagcgaggagtcttcttgacttccaagttggaatggagagattcatggcaacgtctac  
ggagaactgattgatagactgggtgcccgacgaaaaagacaaggctatcttgtttaacgctgcac  
aacacttccccgcatcaagaagaaggagcagtggttattaattggatgcaaagcaataacga  
tttggcggaactaattgttgctttgctgcagttgaaggaatcttcttttagtgggtgcattcgca  
tccattttctggatcaagaacaggggtattttgctgtctcacctcctccaatgagttcattt  
ctagggacgaaggtcttcatcgcgactttgcatgcatgctgttgaaaaagggttttgttgatac  
cccatcaagagaaaggattcttgaaattgtcactgaagccgtccgaattgaacaagaatttctc  
acagtttccctgctgttaaattagtgggaatgaactgcaagttgatgagccagtacattgaat  
ttgtggcagataaactattgggtgaaatgggactagaaaagcactataatgttaccaaccctt  
ccattcatggacaatatttccctcgagaataagaccaacttttttgaaaagagagtcgccgag  
tatcaacgtgccaggtcatggcttctatcaataagatcaagaaggaccaacaaaccaagaaa  
ctggttctcctctcccaattctgactgcacctcctccagtctctcctcatcatccgaacaaga  
agatggtgagacggcgctggggactacatcagttatgacgatttttagttccactattgtgtc  
aatagggtgtgtattgtattattattgttataatatttttaaaaaataaatgttctataagact  
aaaacaatgaatttacttccaatattcctgacaacctttttgttgcggtagatgcatgctctt  
gctctaccatctgccttttacctgatgggaagaacaacccttggtttttgattctgtattaga  
agaggtggtataccctacagatgtgtgtgggccaaggagctggcgaattattcactggtgtg  
gatcttttgaccctctgtataggaggtaaaaacaatggaggtgaatggtcaggaaaaggtcctt  
gtccaaggatcaataacgctgtcgttgaacgagattactcccttgacgaggaggattgtaaagg  
gttagaaaaggggttccgaattcctggcactgaccattttcatactgtcttttcccttgttg  
gtagacagagatatgcacgccaagtgggtgcgcaacaaaataaacctgggtatagtaactgatg  
atgaagatttggtagattctggtattaggactaaatttaataactcttctaaaatttttggtaa  
aggattcaatccgagacctcttactccctcgactatcaagagaggattaagatattaaggtct  
cattttaacaagaggacgggtaatttctttgctcgaggccacttggctccggctggagattttt  
tctcgttcagagagatgggcaacttttgctctagagaatgcagtacctcaatacagaacca  
taacaatggtgaatggaaagatattgaaaatcgtgcaagaactacgccaggtgccgctgggct  
gagactggaccaatattttaccaacacaagaagaaggaatatctagacaagaagaagaagtaca  
tccctatccctcatgccctctacaagattgtgtacgacaagaataacaaggaattgttccgtgt  
acagagtgatatgtcttgaaataaaaatacataattaaagaatttatattgttttattttgtca  
ttatttgatacatttgttgtatgttttaagacaatacagataattttcctccatgacgaaac  
actggtgatatgtctggagctctgatgaatgtcttgccagatgccatcctagtttttctcctgg  
ggaaggtgacgtccgtttgagagaggggttcgctgggttcaactgcagccaagaaaatatccct  
ttgtccagtgacggtaaattgtgtaccgttatttagtgtgatgacattatccctctctgattgt  
ttcaaagcttcataatcttccctcctcatcttcatagtcactctgcaacattctcagtgcttaata  
gaacaataacagagttgggggaaaaatcagtcgtgctacgtccagactggccagatatttttact  
gctccatggtgttaggatcatgctttctaggcttgtctgaaatgtagaccattatagttggctctc

ccatcatalcatalcagtgtagacactagtgtagtattaccaatgctgttttccactcttattgttat  
cacaataatcctcatcttctccaacaagagttgagtagacactggaatctgttagaattgtatg  
agaaactaatgctcttttaaaaatatcgtcactctcttctaaccagaaatctgatacactatca  
ttacatttatttgcagtagtattatcaataaatgaattgagtagaaagggtagaaaggttccacgcaa  
ataaaggtataggcacaactttgctcatcctgtagaggtaaaatggcctgtcttctgttga  
tgattttgaaaaggttgttgcaagaacacaatttcttgcattttttaatgcctcagctgatata  
cgtagacgtatactgtttaacttttgctctgttgtctggttattaaatcctccacacaacgagt  
acatggcattatcgatattctcctcctcagtagatcctctatgaccaaacagccttgggtcattag  
aaaatggctctgggtctttaccgagaggaagaatatctgcattgaattttgaaattatatcattg  
acaacacgttcacagtgtagacagatctctttatgaatttagaggctagagatatgaaatgtctat  
ttaaattggaacctagcctattccaaggaagtgaattttgatgtcttttattatccctctcgtc  
agaaggaacaaaaattgaagtaatctggtccaattaaccgcagctgcagtttctctctggagc  
aatgtttgacgttgttttagtagctgaagagacacttgggttggcttgtcactactagctggaa  
gaggtgttgaaagccacagacgcaaatctgaacgtcatctttagattgggtgtgtagagattt  
tgtgtattcctctctcgtggatttttcttctcctttcattgggacaaaactcctttgtctttaat  
tcttccaagaagtcttgtagacattgtcctcattcgcgaacgttaccttccatcttgcctcgtt  
tcatcacgtcgttgttcttaaacaggcgcgcgagaaagctgcacagggacatttcttccaactt  
tttaggtcttcatggatgtccttcttctccttccccgaagagataaaagaccctataacattc  
tcaatgcaatgaactgcatactgtctcaattttctgtttgtcatcctgaaccaaagcctatta  
ctggaacaacctatgcccacttgtgggtgtatgtgagcccacaagcaactgtcaatttcttcag  
aaggatctcgtatttttcttccattaacatcgttcgtaaaactctgtttatacttgtgagca  
accagttcactataaataacaaggcataagaagcagacaccttctcgtccaaaagtttagaaa  
tttgaagggagagccagctctgccatgtagccatctgattcgtgttcggcgataggtgtcctcat  
cattgtgacggatgcttctcactctatctgctacaaatttactgctttaacaatactttt  
ctgcacgcatttttgtcattagagtttattccttgcatattggagttcacaggggtaaatattctt  
ccccgtcattatcttcatggaggatgaatttttagttttgttgtcgttctttatatactgtt  
caattttgagaagggagtagtccagtagcttttctctacatgcactagccgcagaaagagtgaaa  
ccgagcaggtaaagttgtacacatgaaaaggcacctccaaaaatattaccaatgaaataagcaa  
atattaatcccctgatgtggttgtagggaaatctaaagttgtgctccagactataattcgtttc  
aacgtttaaagtacctttccaatctacgaggcactttaatgtttatgtctggaaggatttcaaaa  
ttctcactaaacatacccgacaacttgtttgattttccaatacaatatctgacctatgtatt  
tttcataaaaagtcaaaatccgtcatcgttaaatacagttgggggcttttttgcatttttaagagt  
atccgaaagatgcaccaaaccagttctgtagttgtagtttgccattgcttcatcgggcaataat  
ttgtcacttcatgtatgcatcgacaacttttctggagcaatttttctcagcatataaacggt  
gccatattttcttatcaggatctagtagttcaacgtgtctagattctattgtcttccatcgcac  
aagaaagtagtcttccagtagtactgggtgcaggccaatctctccatcttctgttgtagtagtct  
atcctcttctgaagcaagatattatggaagcaactccatccaacatgtggtacagggctgatt  
gggtacaccactcgtcactatttactccatcagcagcagtagaagaaatcttgaaggaaactgta  
tatagagatgaaacgaaacagctcttctggatgatgttttcagttctcatgtcagttctctgcata  
agtttctcgtgcccgtataactctgtctacgaattcccagtagcaggttttcttattacgtattctt  
ttaggagtgcttttctgttctatagttgtagtagaagttgaatccataatgtaggaatgagg  
gaggtactttggcacgcacgtgtgtagcactgaccgagacacaacggtgtactgaacaagggttaaa  
gacgttggctgttttacacctctcagaggaatccctctaccagaataagtcctttcatttttt  
aattaacacacgcaaaactgacgtgaaatcgtttctgcaataatgggagaggaagtgggaggag

aactttcgcctgtggctcgtagggatactttcgggtgggtgtaaccgccataattatctctactat  
atgtgccatctactacttttatttccgtccaaaggaagggtaaagaaatcgcgagtcagtaaa  
gacccttggctatacgcgtagatgctaaccatgtcctctccaataattctccctacatgatgt  
tcaatacaaacattaaggctagaaatacactaacagaatgtgatccccaaaatatgaatgaaga  
ggaacgagcagaatttttcaagatccattattttactgggttccctaaagatgtggaaaaggaa  
caggtgcagaagaagaaggaggaagaagaagaagacgaagaggaacagacgacagatactaac  
ccaaaataagaaagtggaatatgtaatgctcgaatctctgagaggggataaggctggatTTTT  
gatagatgagaataagaccatgtctatacaaggttctcctggtaaaaaactgtctgtaagaaa  
acgaccctaccaagtttgtcccaaccctaaaacggaaaagtatgttcccttcagatgaaagat  
TTTTcaggatggaagaaggaaacaggagaaaaggcagaacattatccttcacgtctgtaagac  
aggaagaaccttaatcatgggctcttgtggctaccctgtgatgaaggatataagcaaaggta  
agccaacagtacatgtacacatttgaaccaataaaggaaaaaaagtaatgtctttgTTTTattt  
ccctTTTTtagaaaaattggaacaacaacaatgtcgttggctgtgacagaagattacgggcac  
aatgaaaagttgatcaaacgggttacaacctctgtatatcacaccctctattaggtgcagacc  
atgtaatgaaatccatatcagactacataatTTTctcgtcgttcatgaactacacaaTTTTatt  
aaaacaagttgaaatgtTTTTcgatgaagaaacaggagcagttatagctaatatctgtctgTTA  
aaaatcctagaaagatgCGcagagaaaggaggaatatatgatgcaccagaagatgTTgcattct  
tcaattctaagatgggggaagtaacgcgcctatttactattataggaggtaggcccaatatgac  
ggTgcgggTTAaTTTTaaacatgggcagacaaataatcctgcctatggTTatctcacagatgat  
aatgatactactactgttactcctcctgttactcctcctccatctccagctgcaagaagatccc  
ctTTTTtcacacgcactctcatatccgagtcgtcttcagttgaccattatgtattgatgcatga  
taacccaaaaagatcttcatttaaggtgatgatattcacgcagaaacctttccccataaagct  
ccttctgttccctaccttccccctaaaacctcgtttgaaatTTTctgacgtgactctcgattgTT  
caatggagatTTTTtcacgagacagggatgTTTTtagacaatgttcacgactatattgctaacga  
ccccgtaccatTTTTtagtggatgTTgtgcaccgtggatctagtctccgttgagtaagtactTTA  
gTTgcagccggTctcattagacctgaaaaatacccttcatttgttagaaaagtgtgcttagatc  
aaaatggcatccacttcttcatcaactaagaaaagagtacatgaagaagatgaaaatctcatcc  
cacaacccaaaaagaaaaaatcaaagaaagtactaccatttccctgttgacaagtatagagctgt  
ggataaaaaggTggtaaatctcatacacaagatattagatcaagaaaaggaccaccttctagt  
accgaactgcaaatgataactgaaatgtaatggTgcgcgagaagatctgcttaaacatcttctag  
acgaaggagaatTTAACcctactataaattgaagtagtatcatccatgcctattgaaacaatata  
cgaaatactctcttcttctgctgacgacaagaagTTTgtacagatatcattatcaatgTTgatc  
cacatactTTTctcgtgataagggtactatgtgggtatccaacgcgtgcgttcaaaatgTT  
tggggaacgactataaagtggaatTTTgaaaatatacgtaaaaagtatctgatattggaagactt  
actgaacggcgttTcaaatcattggTctgaacatggTcctcttctcacatgctccattcttca  
atccctattgtacaagacatgTTattgaaacaggctggTgcgttactTTtagcacgtatgatggag  
atgctcaattcgatataatcattcataattaatagTgtcttgtggggaattgataaaagtgttct  
caacgaattgacacaattgatatcgaggggtgTTTTcattgtgtcgtacgtaccgatgcgtgta  
cgaacacctTcaaaggacagtaatcgGCCacaaaatactccttcacaaaatatgtcagcactag  
gtatgaaactcaatacattttcatccagaatctcagTgtacagaaacaatacctTTTaaaaact  
aaccgagttagtgcataactTTtgattacggTtccaaagatgcatcatcatctcctcctcct  
cctcattatcgGacagcgtcaacactTTTgtgaggTgttacaccaactatgacatatctTtaa  
aggTgatttccgactggaaaatgccttatgggTtctTTaagaaaactTTTgacgtcctttattc  
taaggggTtgatgacattatcagTgtctgaaatatacactcaaaaagagTtggTTacgtTTTTg



cgcgcttgaaggaaagggaaatTTTaatctataaaatggagaagagagacattatatgtatac  
tgaaaaagtctttggtcggatttaatttcaggtgtttaaacaattactccctctcttcaaaca  
ctttttaaaaattgaagaggTTaaacatatagcacgTTTTgtcttttagagattacagtctcatg  
tgcaaaaactcaaaaagatttgacagagtttccctgccatacagtctgcttacttttcatggaag  
aattcccttggttgcaaaaacttgatcgacgacgatgatgaaggaggaaagggacatac  
cctattaacatttgctatagtgcacagatatcccttaataagccaacttatttcacaccaatt  
ttaaactcgttagtgaatactacatgtagagacaagcactttactccctcatgcacctcgcca  
acacgtctataatgtaccaatgcaatacactcttgtgccttataataaatggagctaaaccaga  
gttcataaacaagttcaacgagaatgttttgcatatagcgattgaaaatgttaactatggagtc  
atcactgaattgagaggaaacattatccagcgaacaaattgaaaaaatggtcaatgtaagaagaa  
tgatggataatacaacacctttaatgatcgccttggcgagggagaatattgtactcgctcagct  
ttttgacggtctttacaagcccaaaataaaggTccgTTTTcggtcttcaaagaggctaaggata  
ccagagtttgtcctcttaaagggcctaaaggaatcagttgcataatttgaaaacgaggaatatat  
cctacgatattaacatcataaaggatgcagtaatggacaacagctctttttgaaagaggagtacga  
aatagcagcagcaggactgcgaggcaataactgcgacctgaagcagacgagaagactatgaac  
acgtggaactttttcaccaaaaattcaaccaaattgggcaagctctattttccaaaagaataggc  
agaaatttgtaaagattgtggatggatgaataggacatatgaagactctgaatgtgcaatatg  
cttggatagtctggacggggatcttccctcagggagaacaacgtgcggtcattgcttccacaac  
gtctgttggttatccttgataaggatgagcgggccaataatggcagccgcaagaggaggag  
gaataaaatgcccgtcctgcagacaagtcacctgcctcggaaaaagactaggggttgcgacta  
tgatattgaaacagaggaagaacgtgcacgaaaaatgtcgtgccttcggtagaagaaggaaga  
agggaatggaggaagattgggtgttgacagatatgaatttcttgtaggtggagtggtgacaaatg  
aaataaaactataaaatgaactagaatattggattatttttacaccttacacatgttccagaa  
acgtctgttccagaaatgtgttttgagatttctggacaagccatttctggagtaatctgacatt  
gggtcgaccagcggTccaccctcggaacttgacattgggtcgaccgagcggTccaccctctaa  
actcgagcgaaccagaaaaatTTTtaaaaatTTTtgagatggagaatgagtaaaatctcttcc  
ctgaaagggaggtctgaagaggctatgacggttctaggtgcccgccctctccagaaacgtctgt  
tccagaaatgtgttttgagatttctggacactccatttctggagtaatctgacattgggtcgac  
ccagcggTccaccctcggaacttgacatcaggccgaccagcggTccaccctctaaactcgagt  
gaccagaaaaatTTTtaaaaatTTTtgagatggagaatgagtaaaatctcttccctgaaagg  
gagatctgaagaggctataccggttctaggtgccaccctctccagaaacgtctgttccagaaa  
cttactaaagttaaagtagtTTTctggacaagccatttctggagtaatctgacattgggtcgac  
ccagcggTccaccctcggaacttgacatcaggccgaccgagcggTccaccctctaaactcgagc  
gacacagaaaaatTTTtaaaaatTTTtgagatgtagaacgagtaaaactctctagtggattag  
gggtttaaagcctacccttctggTcgcagctagaccagaaacatctgttccagaaacttaa  
taaagttaaagtagtTTTctggacaagccatttctggagtaatctgacattgggtcgaccagc  
ggTccaccctcggaacttgacatcaggccgaccagaggtccaccctctaaactcgagcgaac  
agaaaaatTTTtaaaaatTTTtgagatgtagaacgagtaaaactctctagtggattaggggtg  
taacagcctacccttctgggTcgcagctataccagaaacatctgttccagaaacttactaaag  
ttaaagtagtTTTctggagatgtgTcgcacgtatgcatgcatgacacgtacctatctgtatttt  
tttaaagtaggggaaatgctattttaaataaaacaaccaccattctccgctcactatacagctg  
acctcggtgagtaaccatgtctagcggaaaagtaacctacgaaatcgttgaaaggggattggt  
gaacaacaagtagcttctagatggaggtgcagcaatctgtctgcagtctaattgtgttgcaaga  
aaacgtcacgcccgttccctccacgataacctcttcaagatgctaggtttggcgaccctata

aacagagacggggaaaaacaaacagcaaaaatctggccataattgaagatagacctcaactcgg  
gtcagtatcagttgtccaacacccgacagaaccagaaaggttttgctccatgacattcttattt  
gctcagtacaatatgggtaatggaagaaaatgttacttccctaacgacaaagagtatggtgaga  
gctgcaagaagcacgaaaggggtccacaaatcttccacagaaatgaaaagattgcgcttgtatta  
ctttaacaagtgtcttcacgcgatcgccaaatcacctgcaatgaagaagtacaacaagataatc  
ttccctgccagaattgggtgcgcgccagctggaggagattgggagaagtaccatgcttctattc  
gagatttctccacaatcattgataaggaagtgataatagtgtctcaaaggatgtaattaa  
taaaaccgtcgtcggcaacccccgccaccaccaccatcgaggcgggtataaataagggg  
gcacatgggtggcacactcgcacatcatgtcttccaaccgattcagtcagctgagggg  
agatgggtggggactattcaagatggacaactgtcaagaacaggaggaacagacagcaacagta  
ttcccatagtttccgtccccaacaacaacaacatcaaaaaagaacatcaaccaattctcct  
cctgctccacctcctccattccccatcattagttggggagccctcggcagctactcaatgtatc  
gactggatgaccagtgacagaaattgcgatgaaactggctattacaatttccactcttatgatag  
aaagagggaaagagttcgtctattaacaacactccaagtgaaggcatgtggcggcgcaag  
agatcttccccctccttaataagaagaaggacggttgacgaagctccacctcctcaatcaaac  
aacacatgtacccccctcaacaagtacagtttccgtgaatatactccttcatcaaagcttgtgaa  
ttggcgagacccttcacaagaaaaacaggacaagatcttacaagaggaagaagctcgcgcccct  
accccactccccaagaaaaggaaccagaagtagaaactaaagatgatgttgtcatcgaggaag  
aaactgcaccagaaccagaaccagaaccagccccagttccagaccagatattcccgcaataac  
tgcaactactactactactacagttgcaacacgtcacgacgattcttctacagtatttctcaga  
aatgttattctgagtatcgtgttttggtttctgggtgtttattctgcattatttgcaaaatgta  
ttagatctaagaaggaataaataaaatgggtatatgaaatttaaatctttattgtttctttccaa  
ttactccattgaaattgtcctccttgtgagtgcgcccttctggcaacactcccattgccaag  
gctaaagggtgtatagttccatccctccttgggtgggaatgggtcctctatctgattgaca  
aggggaatctatccttcaaatacaccctctgaaacagaaacagttttttctctgtataata  
tctgctcattaatccttcatatccaaaatgggtgatgggtgtgcaatttcccttagattagg  
cctacgcttctaaagtagaggggtgaaagatcatcaaatagggttctgggcctttaactcttacc  
cctccaatgttgtttttgttccactaagatctgaaggctctcatgaaatctgcatagggtat  
cacacctcttgtacaagcactctgagcagctgtagggtgcgcaagattcgaatcctccatggtag  
ggtgtcaatacaggaagtacatggactcttctcatgactctagggactcttttactcgttcat  
agaaaccgaccatgtctttttgtcctcctctacatactttgatgatgatgatgttctaacg  
gagattttctgtagcctttccttgttattgattgtgaaaacttccgcatcttcttccaaatcc  
acataatctgaaatagataatctcctccttcttgtactaccggcagtgcttccctcctaacatt  
ccatattgctgttaactacttccaccacaacttcaactcccacagttgggtcaatgcttgcg  
ttcatttattgtcgcagaatcggccgatattggtggcgaatctatgtctgtaaagcaaggcgt  
gcatacaggctcactatatccttgacaccctcaacgtagggggaaaatgttcccacgtaa  
tagaggcagtaactccatgagaagactcgaaaaagtccactatccttctagcctttgcaccctc  
ttgaccogtttttgcgtcatcccttataatgtggaaaatttcagcctccgcaggaggcagccc  
ggcaagcgttcataatcctccattaaaatgtcattagatacaatatctgtcataccaacatccc  
ctaacaattctgcgcttccatcgaacgtacccttcccttctcgtccaaaacagcagcaggtac  
ttcttgtcttgtggaataaggagtgtaagccgtactcctacgcatggcacaataatttattagg  
gccaacataacattggaagatatatcccatatattttctgttgcagcttttaggtttatctt  
ttccattagtttttagtttctccgatagtatatttagtattctagcgtctccggattgagctctc  
gagtgctgcagagagatgaacatcgttttttagggagggttagtcatgaggggaaaacgtgaa

ctatttcctctgctaggtggtgccgctatagggtcagttttgttcctaccccctccattcactt  
tgggacagaataaacggtgggtgcaattacagttctccttttctcccaattccccgattttatc  
gaatatgtttttactattaggatccttgcatctcaaaaatactcttttctccaatattggcagga  
agtagccgtggtttgttcctctacataactctttatagaaaatttagataacgaagaatgtgatt  
gcgggccagggtttggggaccatcattgtagtgtactgagagaggggcacccgagcacgggta  
tccgaaagattggccagtttctccctgacacaaggcggggagtacacgccgttcaagtagtg  
ccggccgtgtgggggctcagaccccaatctgctctgaaccgattagggatcaattctggcctaa  
taaacgtttcagaggaaagagtcctaaccctgagtagcactcaaagagagccataggaggagg  
gatgaaattgagggctccttcagtttcttgacttcacattgttgccataattcatccccttca  
tggaatttttagagggactattccatgcatggaccgaccgtgccgttcgagactgattcttgg  
cactcttttgaatgagaaaactggaaggtatgggtaaaggaaatccccctaaaactccccaaaa  
tgatgtagcttgagcagccgcagacactcccgaggaggagcgagaggcttagaaaagggtcgt  
gctggagcgtacgaattgaaggagggttttaaatgtctgttgcgaatttagaatagctctaagt  
ctccctttgttactcgatcataagtgttggatggctgtcaagttgtcggccgaaccagggtc  
tcctctcgcgttgaccggcgatctgcgttcgaaccagggtgtgttcggggagagaagatgcagga  
atctccatagggtcttacaagagggtgaagatgcaccattcattaaaactccatctccagtgagga  
ttgctcctgcaaaaatatcgggcttttttgataacgtttttgcgaccctttcggcctcgcgcat  
accgctaccttctattccattatattagtcctcttcccagaaaaatgtcccttcattagaagct  
atgcgccacgcagttggaggggtgagcaaacattccatagcttcttttccccactttcttaa  
aactgcagatgaaccagccttgtaatgatcaattattttgggagaattttagacaatatttt  
ctcactgaatcttgcaaagggtggaactttcttagcaccctgcgctgtaacagggttgagaata  
atacctccaatttctttgaaattggcattgtttgggttcattgtatattgatcttgtattgatgg  
gcaggccagacctctcttttcttcgccgttcaagttggggaaaaaatagtcagaaagtaaat  
tgtaacgctcgtcaaaaactattactagaatttgtaaccatcatagaatttaagtactgttcgca  
aaagattggctctctttcttgtgccgtcaaaagagagtgcttgaaaattgtctcgatgggagtg  
gggccattcgccttagcggtaggtctatagtgtaccaagggaataatcttatttactgtttatc  
attttttagcagaagggttttcttattactctatggagtgaaggaaacgacgtatgctgttgcg  
catatgccagagtcgtgagattttctcagtttctgtaaggggttatctttgtacgaatcgtacc  
ctgccttgtcagaatctttaaggaaggatgtttctatggctcgtatcgttgtgcgcatcccttct  
gtcagtttactcctgaaggatgcctgctctcatgtgaaccgtctcggggaagattttacc  
tgggacgctattatgccacagcatgatctatgctatcgattcctaaaccgggaatattgctat  
ggggtaaaggcagaccctgagcgtatgcgtttggatgttcagtaaaatttccccctccagctcc  
aaccagccattatcgtttagtgcactctccgttccagatgtgagcggccacacttctgttcca  
ctgtagggcactacacctctacagattcactgactgtgagtttctctgttcgctcagaatctt  
caattcttgagtgccaatggccggcggcgtccatggcagattcgcgcaataatcctcccgta  
cagatggcctccgttaaacgctgtaatttcagggtgctcttccaaaagagaagcggcataagaa  
tagccgagagccgacatcctcgatcgtttctcgttctagggaggcagcgtccttagtactac  
cacctaaagtttctgtacctttctgttatttgcagcaataatttgcaccctctacaaagggtg  
agcataatctgtttttgccgcatcgggaagatctataccggccacttcttccagtctgatttgt  
gtactttcatcacaagacagccctttgttccagtatctcctacaacccatacctgaacatga  
cagggcagccttagacctgttcttttctgtataccaccttctttcttctcacattttggggc  
gttgggtggcaggggtctctctgctgggagttagccagggttcgcacaaacaatccatagtagaagtc  
atactgcttatgtcgaaatcgatctcgtccacatcatcaataattgagaatgtttaggggtgta  
taggtcgcacctccttttctccacacagtagcaatatctgtgcaccaagaatgggctctaa

tcttgatctttattgagaaggaaggatcctttcgcaccacagacgaatctacacaccctctt  
tttttggtgatataagtcggtccctttttctcctccagttatgactcctccagattcgtagt  
gcaaataagcctcctcgacagtagtaaaaggggtgacgtttctgtaggctgcatctgtagcaac  
atcatcgtcgtgcttgtcgaacgcagaagaggctgaaaaaatagtatcggcgagaggacacaa  
actccgtcatattcatcatctctctataccgtattcagttttcaattctctactggatttga  
cgcaagttcctcccccgagagaacgacagctaattgcattcaaaatcgttgcctcctacgcgaca  
tttttaggagttttaaacagtcaaattgtgttataatgggaactaatttcccctggtaataga  
gattctacaaaacctttccctatgatgtctgacttgactccagccataccgaagggggcgctccg  
tatcgacatataaggggtcgaaaggggtgggaataattccccattttcttttaatcctttgac  
gctgaaagagtttcgagacatggctcctgtatctacaaaagagctcgcttaaccacagttgcac  
tcaccgggtacaataagacaaaaattataaattgggaagaccgatacagtccttcatgacaaa  
atccccgagaacaaaagattggtgtctaggaacaaagaaacattaaaaatggttgcccgaagc  
tccaagaccaaattcccgcctggaagcaagaagagggtccaccactgctggacgcatctccaagc  
ggaggagcccatcaatgaagaagcgtgcaggaaagaagagctccactgtccgctcgccgttctc  
aaagagcggaaagaagtctggagcccgaagtcaaggcgttaattcttccctgtacaacaacta  
tgttatttaattgatttttttcttctgaataattggaaataataaaacatccattgaaactta  
tgcagtatttttattcaattttttaaccaactataaatccacatgtggtataaaaagtttaaggg  
tacagatatattataagatgatgtaacagatgcacgggtcaataacaacagggcctgaagaagtg  
tctatgaattttctgtagaattcttccctgtctgtacttgacgctacattggcaaataccagag  
ggtctactagtacacctgagctagtgcgggttctattttagacatgacattttgagggatttt  
aacacataatacaatatcatcatggtcgaatgtcgtcctgttccagagacggcgatgtagtgct  
gaatttctatccactaaaactagaccatcgtcatttttcaaatgcttctttccttcaatttctag  
ctacaattttcatgtagaatcttactctttctgcatacgacaccaccttgtcttgattcccaac  
tatagcaaatagtaacgaggaagtaaatcattgtttgaccattattattgtagaacccggtt  
gcactaccaattcctccacatctagggcttagacgtaccagaaattgtccatcggcctaaccgag  
taacagggctcgccgctagggccatgtggctagccgagctctgtagaggggcaactggttgtctca  
ttgagaataagaaccactgcgcgtagggcggccagtgtttctccagttcgtgtatctgtctgca  
ggttcgtcagggattttatttgctccaaaaacaacaataccccattttcctaaaatagccgcaa  
gtttcttgtcttctttatttaccagaagattttcctttttgggtccagactcgtctaccacgta  
tgtagtatttgaagtgtgcacaatttgggtctaatgtttcttcagaaacgcgctctcccatgtac  
attttagcgtacactttctccccctgtgtatacgttccactaggtgctggcaataactgtcgat  
gacgttcttgttcttctatcgatttgttccctcaaccagttttctattgaaaattcagtttgagt  
atctgtattgacaatgtttgtagtatcattcgttcttattggaagaaatgaaaatgtgcccaggg  
tactttatttctccccgtaatcagcgaatgccattcaggtatgctttaggttagggggacaa  
gactagtctgtttcatgaaaggggtcccttatccctctattagaaatgggaggaagtgtagtgcg  
acagtagactatgcccttgttgggttatgtcgggtggcgggtgtgtcccttacaggtgcccgtaaag  
gttgagggatcattccatatagccaattcgttagatggtagacagacatgtctgaaaactgtcctt  
caaatgcccgtccatcgtaaagggcatctgtatgcctttatcgtcacctccaaatacttccat  
ctttacactgaaaaccctatcgtctcgtgcaccgtcaataaataatagggcggctgggtattctc  
gaagaaagaacgttttcttttgcaagtatagaaccagacacgggatcgggagactgtgatgtggt  
agcttttcttcaaggacaacatcatcatcatcattgacgataacatcagatacggacaa  
gacagtagttttgttccctgacgtgatactgtgaatgggttggaaatgggttatcactcgcttct  
actagggcgttatgcgaatctaaaacagggaaaacagcgtacagtttagtaggttctgcccgtg  
cctaaatgtaggctgttcacctcccagtaatgcagtttgaacgggggtaataatctccacc

tcgtacttcagtcaatggaccaactgaaacgtttaagcaccgagggcagtagagatgttgtgcg  
tcaccggcatattctgtggcggggaagaaagcacagccgttattcgaggttctctattatcat  
tatcagttttcaagatgatacatgggtcttagttggtaggagaagaaatctggcccgttcgtggg  
tccaggccaatctggtgacagttgcagcatctactctaaagtttacgctagaaccgaagcaccg  
actctcgaaggtgtattatgtacaacaactttgttcgtggttagcattcacatcagtacttataa  
ccgagaacaatttatcagattgagtaacttttgatgctggaaatacaatattgtaccagaaga  
tgtgggttaaaccgacagacgacggtttgaagcccacaatccagcccaacattttccattgcgct  
tctattttcactttcaggtacagacacacatataaagggtccgagctgggttagatggatttctaa  
gggtgggttatctctgtggcggttagaatcttgtaaccctcggattcatttccctccatattctt  
taacgtttcattgtatagtagtactttgtttaatactgggtgtgtaaacagtgtttgtttcgagtac  
acgaacgacactgaaggtttgtaatatctgaaagttgattttcgcgaggtagtttagctgcta  
aattggacgctatttcagcttgtcgggaaagacggggaaattagcagggtaatctgaaacata  
tttttcattcaatgtatcaggagtgattccacattatcatagttttattgctttaggcatatca  
agcctcatgagggctacattttctacaagcaaaaacttccgttattttttgggtatgggtgaagata  
ttgttacctgagaatcgaataacacggctctgtttttatcctctgttacaatggaaattttcag  
tctattcccagtggtgaaaatacttccctttgttgatagtggtataaccgtcagctagagaattt  
acttccacgtggttgaatacggcttgttgtttattgccattggtgagagagaacgcattcgggt  
cattgggtgataggaggccaacctgctgggacaaattcagggaaagtttcgaatagagacggacc  
actatcgtgctgccacccccgtcttctccttcatatttttcatccactaaatcaacttttatc  
tctgccttaaaggggaagaggacattatctggtaatatccgtcaagaatatgtatcctcacga  
tgggtatcttttccacctttttctaataattcttctgtacggatattaatcattcgaattggcag  
caatgatgatgatgaaccatctctatcaggagccgattgaggagaaatatcatcaccaata  
tcataaccgatctgccgtgacagtgcggtttcattatactgtgtaacaattttggatcctgcacat  
cagtgacacgttttaattcctcagaggatatacctttcaatatttttagcagagttttttgacgc  
cggttctaaccattcttcaagttccttttcttttccgggtcttttctaacagcagcggaatca  
tcgatagccgctgctatattcccgaatacagctttttctattttcgcaggttttcttatgtgta  
tcacaccagatctttcatcggggcgtaaaattgttctggacaattttcataccaatataggaaat  
aatagaaataaacacaacgagaagcgtgaattcaaaggcaccaccacgagccaaaaataacc  
gtgactgctggttctccaacattgttattgctggttcttaacggcaggggttggttggtcggcaa  
atcaaggaaacaaaaaagttaccgggcatggcagggaaatagaaccagttcgtatcgtccctg  
attgctaaatgtatatcagacgtggaacaaggcatggagtgttggtggcagacaagcacaggatg  
cattaatgactcgcctagccaacttaaaattggggcagattctcttaagaaactgatgttaattt  
ggaatacttgagatacgcgtctacgcccctccttgggggaattaaactacgacaaacaacaatat  
gcggaacagttgacatcaacctaatgggtcatttctcctacgctgctttgggtatagaaagta  
tactgaattctatacggagagttgtagtggttaacatcaacgtagaaataatggaaaaaac  
ttctgaaccaatctcacgcccctaccggctgggaggggtagaacctcctctatcgtcagagttg  
gcaaatgcaataagggacaagttcatcagcatggggcggttgacagattgaattcagcaatag  
tgacagcggccttgggggctattgcccagtgaaactgtaactattcttacgtgaaaatgctgtaaa  
ctacatgtacgatgtagaatttgcagaaagagatgctgctactacagatacaggggaatgtagtc  
tatctttccacaaaatggacgaagatgaagatgacataataaagcgttcagaaatattagata  
aggatcaaaacgaccgcaaaggaaggatagactggcgccccaccctgacaattcgttccc  
ttaccaattgatttggggcgatgattctgttagatgatactgttcttatagatctcataccaat  
gcatcgtgcctaataatttttatggcaaaatttatcctgttcatatgtaaccatttaagggcag  
ttattaggagtagagggaaattttatacggtaaacatttcttcttcatccgataattattttga

ggatggacgtaaatgggtgcttctgggtgaaacctgtacaatagactggaatggttcatgttagta  
gttagatttgtaatcttccactcaaaaaaggagtccttttcaggagctgacaatgttaacg  
tgaaaagacttctgggtgtagttgtggagagtttctcccgcttctcttggacactgaatgggt  
caagactaatataacgtcatggcctgttattaataacagcaataataatagtacactccctgtg  
acagaagacaccttaatgagactagcgataaggacgagtagcggtgcccgacatcctatcttctg  
acgaaattaactccttgacaacagcagtgaccaaccgtattaccttccagtctgcagaattctg  
caciaagatcttctcgggagctctggacgaagaagaagctggaacaaaaatgctagtaaaa  
tcagtcaaagagacgggagaagaaaaggataagaacaatacgttctcttcatttgggttattac  
tgaagaacacaaaaatgaagaattggaataaacataggcgataacgatgatgagactacaga  
tgtggcttgttgggcacgtacttctcgacatcctttatccgtaataggacatatgctgtttaa  
aaaatatggggccttgaggatgcaagtgatgtagtgcgagctgaagcgagagagtgcgccatta  
catcctttgtcaccgataagagcagtcctctcctatcttccgtagtgtgtccgactggagttgct  
actattacatccctgttgtaaagcaccggccataatataaaagtgtgtggttacaaatcctgaaa  
gatttttcccaggaaaatataaaaactataaatgaaaaggtaacaatctctttcatctgagattt  
gtcagaaatcaaacgaccgttttaaaaaataaaaaaattgctgcccgaacacgcttcgcagtgtaa  
aaagttattaatacagataagcaacagggagcaagaagcagcactatctacagaacactgtatt  
tggttaacgattttgtggaacaagtgcgttcagaacactctcaaccttctggagaattttcccg  
tataaaaggggaaagtactcaacatggttcaactcacttgaccggagccttccgcaagatgaacaa  
cctagtcaatcgcagcttattgacgttcaccgagtggtggccgagttatcctatccagaattc  
gaagaggatgtaaagaatccggaatcatccatataatagaactccgatatccctcttccaaaaca  
aggatattgttacaatagttgggtgattacatcctctctccgaagacggactcattccaagtct  
ataccaatcaagaaggtcatcgaacacttcccagtaatcttccactgcaccccacaataatgcc  
cctctctgggtacaccttctggacgaacgccatcatcgctgctccagagcctgctgacgtacg  
agattgtgaatgccaagtacaggggtattgttgtcatccatactacagggcgccccatcaacta  
tcaaactgggaagagtctactgatgagcaaactggcgctccgtaaaagttctggacattttaatg  
agatgtggatcatacaaattcatctcattaatgtgcatgatcaacaagaagaacaacaccaact  
ttcttcaactgctgtgcaagtaaatggggagaagttggaagcaagatgatgctccacattgctga  
aatgttctttgccaacctactactagccaacacctatccgacgctagtagtttccctgatgct  
gcagcagaggacgacaaggggaaaacacctgccatctagcaatccaagaagataatgctgatg  
cactcctgttccctgatctccctctacggcgccacctggtttcaagataacaactcgtacatgaa  
atctgcccttgaactcaagtctaacaagtgtgtcaaggtactatcctttgcagctgacaagtac  
gagattttacccaacattaacaacaatcaactagaaccagataccatgtgtggagtgtgtgcaa  
catctgtggaagaagatgaaaatgaagggaaaacaacaagtcttccctggtagcagatgaattg  
caagcattacatccattgcgaatgcctgatgggaatgtgtgctgctgctggcaatgtacaatgc  
ccatgtgccgtgaggatgtgggcgacgaagtactggaaagatgccctcctacaatatttagat  
ggtaaaactggctgagagatctgaacacaatcgtgtactttttgaagcaaaaaagcaagaatt  
ctataagcagatggaagcaatgaaacctccagagttgttgttctcctcctcgcaggacatttctc  
acccagccagaagaggcgaacgagccatcagaatcgcaagagaaattgccaccaacgccatcg  
ctgaagccacagctcaaggagatgtcaactcctacttccctgttctcattgacggggagcggaga  
agaatatgaagaagagggagaagaattcttcaattctgaagaggaggcgttgcttttggaga  
ccatttctggaagatgaggaagaagccagacaaatacagatgcccagtttgctgaactgtcta  
gacgaggcgtttctgtcaatattattaacaatgataatcctcatcgacacatctctacagtaaa  
tattgtgcaaccagtttatggagttgaaaagtcacctgctgcttccctcatctacaacatgctc  
aagaatgacgtctttgagtctatacgtcaagagatactcgagttggaggagaagagatgcccg

tcatgaacctgtccaatgacaagagggcattattccacgcagcttcttccatgctttgtgactt  
tgccacagaaacaaactctcaaattggttgattggactttcaagcagtgatgatccccatcac  
atatccaactatatcgagacgtttggtagtcctcttcacgcctaccaggagccgtcacttttc  
tggacggggcccaggactattatgcagagagtatcagatacgcacaatgatattgtctcattctc  
agaaatggcaagtgagttgcacatcacgaagcattagatgtctttgagggtagtttattatcc  
ccactgttcaagaaaatcaggactggaaaatcttactctaactggaacgaccatttgaggcgta  
gaaattatgctcgagatattgctgaggaatttggttagggatgtgaaaactctctagcttcacg  
cgaacacccccctgttcatgtacatcccttttagagatggagcaatccccattctcattgaatat  
atagtagatttcatccaccactgcatcacctggctatgcaagttaatgcactccattgtatga  
gaaagtacattgaacacgagaatacaaatgtgcacctgttaaacttgcgctcctactgatgaaag  
ggtggaagttttaagggatctcaactcagatggagccgcttgttcaatgaacaatacaacact  
agaatgtccctcagcaccaaaagattgagcctcatgaagatcttcaaccatgatttggggtgtgt  
ctaaatttgggtgtatacaaaactcctagatattattgaaatgtactgttttactttaatctaaac  
aataaaaaataatgtaaagaattccatgtttttcatccctcctcctctgtgggtgtgtatataa  
ggcgggtagcctcctccacaggcacacttgccagtagccgttgctcgagtgaacatcatggcag  
cagacctcctagagttggctatccaggaaacaatccagctctgaattggaagaaattgccgatac  
tgaattcctcaattatcttccccataaaaactggcatctgcaagaagctgcagctaatggacgg  
ccatatcttccctacactagaaatgaggaacgaagttgaccatttctgggtcccaagataacagga  
agctgaaactcttggggcatttttgtggcaacttgatgtggaggcatttatagctggttctat  
agatgctgaaacgtgctgggtttttgaggtcgcaagcaactggactaggataccctctattg  
aaaaactagccctgattgcccgtgaggataaatcaaatacaactaattacaacttgtaacattg  
atagaaattcaatgatgaaacaagtttttagtgctgaaattgataagcgtccttcatcaataca  
gaacacttctcacacaaaatcttccccgtgtacttgaaactgatcgacagaagaaccgagtg  
cttgcctggattggctggacgcatccaagaggacggccaaggaattggagcagccagaaagg  
tttgtttccctccagaacctgattggtgccatattaatacctgcatacacagaaacgtttgttct  
tgatacaggcaacgaactagaacagcaagtattggatgatgcataattttaatgcgagaaataa  
gataaagtggatgaaatgtgtgtagtgggccatattgagtactttgcacaatttatttgtagga  
aaagtcttccccatcatttgtacaatgcaccttccgtcttccctcctttggacaacaccctat  
catcaacattgaaaattcctcattctttaatgaagatacgacacctattctagcgtcaatttct  
ataccatcaagtatggtaataaaacaccatacgcgaaaaatagtagatggagatgtccaata  
acttgatgactgcagcagaacggtctatatttttacgtggagtttaacagtcagtgagatta  
cggatggttttctgtaattgtaggatctactataatgcctagtgtacttttctatggcgaccga  
aaacatctaataaatacagtcaaatctaataacttttctgccataacctgttcttattggaaca  
agtatatggattgcagatcttatgggtttgagattatagacacacctgaaaataactgtgggtt  
tcgtataagggctgcaattgattgctcgaacacagatttccattcaccggtaacgcgagtcaac  
aagaagaaaacgagcattattaatgcggtaaagaaccctttttttattagacacacagaacct  
agtggtacaacaaaaatgccatgtgtgggtgaagtattggaatggtggcgtgacctcgaaca  
acacgtccgtgttagtgatgagtatatggacagatttggtagtctattacttgacgagaaaag  
aatggacgtgtaattatctagatagaataaagtctctagaaactatttctaacaatctcaagg  
gtaaaattgacaccatgtgtaaaattctagaaaccaagtataactacaaatcttcttcttata  
ctataagcaataactgctacgtctgatgatcctataaagatgaagattatcgctctataaac  
aagaggaggtatttgtgtaatatcttagaatttgctataatctcatcagagaaaaaggatgagg  
tggaggaagatcacactaaaaccggcaatgggtggttgtgctgttttcaaagtataagaaaaaca  
actcgaacctaaacaacattttaattgttaaagtgaataaatacattgaggctttttcgttaatt

aagatgctgagaaatgattgccaacgcaacaagtgtaggtttaagaggctgaaattagagagt  
gcgccaacgaactggtagcagaactgtatagggcttcggccagaagttatgtccacgatctggt  
attgaagcgaactaatgtccacttgacatggcaacgccttacgatgaaaacgctaactatc  
atgtctttaatacctaaatgtaagctacacacagatattgtacgataaagattcgcgcgatgta  
agttggtgaatctctgagaacgaggatggaaattataaccaataagacactctatgctgga  
gttagtatacggagaggagtacgctaaagatgtcagtagttacctgttttgatggtaaaa  
tggtagctcgaaaaagggtgtgattaaatatgaagactttttggatcgttacgagaaaacggggg  
aggaagataaagacgaaaggggaattcttagactaaaaaatgtagtagagatcacactaagga  
tataaaaaaatagaaaatgtactaaattctgatacactttattcttattctctcgataaaaat  
gtgcaaacccacgcatcttctagtagcagttgtaaaaaatgacactgacggaaaaacgtctatgg  
tgggctgggattatatttttcaatcggtaaaaggagaaaaacaacccaaaaacgaaaactgga  
aacgatagatatatcgagtagtgacgacgacgatgaagaagaagaggaagaggaagaagaagag  
gaagaagatgaaggaaaaagaatgaaaatgaataactgcagcagcagcatcaagaacaagagca  
agaacaagaatgggagaatgtggtgcacagatattctcaatggtgtagaaccttctctaccta  
tactttatcgttcaattgtgtaaaaagtatggatgtggtgaatttggtatgatgtaaaaaata  
taaaaatattgtacattttattacatttgtttgtttgacacctgagcgggttgggctgttga  
cgtgcctaactttttgtcaccctcatgaatacaatttgtaagggtgctgaaatgtactgtttt  
ttatccaaatttctgtactgaagaatattgaaagaagacttcttgaagaggaccgataaaaa  
atggccaccttccagactgacgccgatttcttgctggtgggggatgatactagtagatatgaag  
aagtgatgaagacttttgatactggtgaggcagtcaggaagagtgatctagatgaccgtgttta  
catggtgtgcctaaagcagggatctacttttgctcctcaatggaggcatcgaagaattgcgtctt  
ttgactggagattcaacgctggagattcaaccatgatgtgccaacaacagaataaaaataaag  
acggtagcgggagactaataatctttcttagtttcccgtcacggtgaaaatggtgggtatttctt  
ccctatgtttaaaaatgttcttggttaaaaaataaaaacgaaaactgtcaatatattgtttta  
ttgatatacaatatccctttttacacagaaatggcatgtctctttacacgctgttgttcttgag  
tggtgtttccatcttcttcttcttctacgctcgctatcaaattcattgtcgttttcccaggctct  
ttttactcccctttgctcctgttctactggttagactgttctccattttctcgttcttttggtcc  
tccctcttctttaccttctcaaaccacttttcgggtcttgtttctcgtacgagcttcccttggtg  
tcaaatgtctttccttggtgtacctaagtacaatttttgatgtgttctccatcatggaatggag  
cttcccttggtgttcaatttcaaatgggtcataattttcttcatcaagttcttgaggcgaagag  
atgtctatcctctgcccactttagatagacgggtgccatcattcataaagattcggatatcagaac  
ctgtcactttttgtacaatacccttcaaatcttcatcacttggaggggtctggaaaactatact  
tgatcggttacattttaataccttgaacttgttttggtgtttgatactgtcgttgcaagcgata  
ggtgctcacagccagtcacggccatgatgagtctgggctcatacctgcagtatcccttttct  
tgttatgggggagaaaatgtacctcaaacattttctgttgcagtttcaaggaaccactttt  
gtctgtcctgcacaacaagtagaattctgttagaggatatcgagaagacgagacaagagccgctg  
tcgatctgaaggctgcattggaagatttcttgtgtacatttctgagagattctttttgttct  
cagagactttgaaaagttgttcagtttctgatatacagatttttgtactcctctttctttactac  
ttgtgtttctagttccttttcaacttttggtctttactactgtgtttctagttccttttca  
acttttggtgtcttttcgacctggttttctagttcctcttttatttgtaatttttcttagcca  
actcttcgcgtatctggcgttgcttttcatcactgtataagataacagcgtaggctagtgctga  
aaggtagatttcaatgcttgcagcagaaggggtgtgcgctccttgcaaaaacgcccgcaccata  
aacaaggaacaatcaagcaatgtgaagaatggctcctgaaaataggattggctatatattctc  
ctttgtaatgggtacggtagcaaatttcaaccaatgggacctatcttgaaacatggtt



ctgcatagttctctccattgactttaagcgtgctgacgttcattgtactgaaacctaaccg  
attaagaaatcggaacttattatcatacaatcgtgttttttttctactgcttcagaaagactat  
tgctcatgtacctgtataattgactgaatttaagtccttgtcttttcgttttaatttttccct  
gactattgtattgattttacgcacgtcttcttcttgcgttgcaagccattcctcgtcagtaacg  
tgcccagcatcatctttgaataaatgtccagggtcaggaggggcacaacttatccggttcaattc  
ttaagagtcacatcttctaccaattcttgaatctttttaaccctcttgcgaatttgagttggtt  
atctttcttcacatgtacaacaaatgtgtcttcggacaattcgctttgtcttatagattcgata  
gcttcataaacacccatgacttgctcatatttacttgttttcttcccgatcatcaggaatgacg  
atcttagttttaactccttttctgatacactttcattactaacaggggttattgtttttctctcc  
aatgtattccatatttatcttcttcaaaacaacaacggaaaatacagttttcttttaagaaata  
taggttacaatactgtggattgataattttactcacagctttgttcaaaacttaactacgtggt  
tcggcccattttgaccagatctgttttaaggaactgggtaaaatacacatgaaaacactcct  
tttgaacaaattcagatttatatgtatttgcgattttttattaatattaataaagtatattttt  
aaaaattaggatggggacagatgggtgtagattgatacagtgaccgtccctgttattttacctta  
atttttttccctataatacaaaataattgggtatcagtttaggaaaacataattttaaaatgaag  
gttatcatatcaactaaacacttttatttacccttttcacctcagaaatatcctcacataat  
cgcatgcaagacttgccgattttcttccctgccgtacaaatcaatagcaaacgctaaccgccaaca  
gatacgtctccacttctagagatgggggttgaacattacgggaaaacatgtaccctagatacac  
cagtggaataactaggcaatgggaatgataactcttgaaaatgggggttacaacaatatcacc  
ttgtattttttgagatggcacacttcggccacaggcaccatgtatatttcagaccacttttcc  
gcatatttccctctatcgctattaatttttccatgacatcatcagcactaaaaccgagaccaat  
caaaaaatctgtgctaacaacaaaacgttccttttccccgaaaggatatttgaggaagacttttt  
gttatatacctgtaagttggactgaaataaaaccctctaacaacatccgtgtcttttctttta  
cgagcttatttacttctgtacgtctttgtcttgagaagcaagccactcgtcatcagtagttgt  
agacgtgtttttaagtataacgtgtcctttctcaggcttaatagaggataataatgattctatc  
ttgagggaaattgtccctgtgagctctcttaattctttcagtccttcaaaagtaatgtggt  
tattttcctttaattgtacaatgaaaacgccgtctctaaattcactctttcggatagtttcaac  
tgcttcaaatgtactcattacttcttatacttttcatattgtttttctccaatcattagaaaa  
gaagagcgtagctgtaactcgtcttcttcagggtgtctcatccaggagatttatcagtttttgtt  
cccctataactccatggttttatttagtcagttgatttatttttctctttgacacagtttttat  
ggactctgggattactttactcaaaaatttactcacatggtttaaagtttgagtgtattct  
tttgtggtaaaactaacaatgaagtacatttcttagtaaatgaggtaggtactgattcgtgatgg  
ataacgatggcgtcccatgtctagtgtgagtcacataataaaaagggaataaaaataaga  
actagtaacataatttttatcttctcaatatgttgtttgatttctttctaaaaatggc  
tgctgcaaaaatggacgctatccttgcggatattaatgggaatgatacagatttatccaagcta  
atcacagacgtgattcaaaagagagccaaggctgtcatggatagaaataggggctaaaatggaca  
tgaatagaagagtagatgaggctattcaggaagccgtagcggccaagaacaaaaagcattagt  
ggatattgataaactcgtggaagaaactgacagcggacaaagtgtccctccaacattatcggga  
tccgattacgacgcgtgggttagacagagccatgccttcgcatattgaacttgtagagagtgttg  
agggagattctttgtatgataaactccctccttttaacgtacaagacatagacgaccaaatacgg  
tgatgagatagatacacaatatcttaccttgccatggtagtggtaaaagtcgactgtgaaact  
ggggatatcgaagaagagtacaatcttgcctacctttgggtgtgacacaaaataataaaatat  
acagagatgaaagagaccagatttttacaaggctgataaatctgtgctgattttttaacttgc  
taaattggatagtatatcaggtaaaagtagacaactgacgtatgcggtaaaaaataacaatgaa



agttaagagtatcatatctgggctgaggacattggggatactctgtttcagttataaaaagtgc  
tctccagaaaggatgcaggaggaacgatgaggatataactgcgtggtcaatcagggaggcttat  
ctctattaccatcttggattgaattacattgaaaacgtaaaacctgctgcaaaatcattaata  
caaatatggtaaacagaattaaaatcatagctgtggaggataaccagtcctagaagtatggtggc  
ttctaatagtgtgtgagaactctagaaaaatatgaaaaggggaatttttaggcaaccagttac  
ttgatggatgctgccatgaggctagttcacgcctccagttctagagtgtgctcccacatgagag  
ctttgtgttgcaaggaagaggacagtgataaattagggggtatattattatgctaattttaatga  
actgaaactcagtggttagtgagttatattttctccatagaaagaattaaacacgtcttc  
aggagattgaaagtgtaaaattggggaagaaaagtgtacagttattaatattaagaagtgtag  
cagcttaccatgtgttaagatattatggggataaagtgaaagatacaataaagaacatagtg  
accattcaagcgaagagtttgagcagttttgggggttatgctttaatttgttactcagcac  
gtaaaacagacctgaattacgttgtattttaatgagttgacatatgccataaattggagaa  
gggattttttctgctcaaaagggttcttttagagaagaaagtctattccttacatctattgtgga  
attaattatagccatgtgcataggtgaccgtaaacagtttgccaagattcagaaaagggtatta  
aaacgtttcaataaaggagaagaaggagaaaagaaggctgctacatttgattggatagaag  
gacatgttaaacggatgcctcaaatgcctgtatgggttctggacaaacatacgaacaaaaacac  
acatggagtatcttttgccctagagagtagtatggtttctggaggagacaagcgtgggtcccca  
ggggtgtggcttcattcttatacaaaagatgcgtctagattctccccctcccccagaagtgggccc  
aatttctggatcaggcttttaatacattgaagcgagaagctgctagtcattgctaacgaggaa  
tatttgtactactacaggatttataaaggcttctagttttactgctaataattaattctgaaccg  
atggaaattaaggaagaaataaagaaaaagaaaaattgagattaaggatgataatactactgcta  
ctgttactgttagtgctactactagtagttctattacttctactccacctcctacaaagaaaca  
aaaaacaactccaagtggaagcaataaagtagactctatacaattgaataatctaccaacttta  
aatatggaggatttagatagagtactagaagtacacaaccaaactctaaaaaggggtgtagctg  
ctacagttttaatgaaggatggaataaagttgtgtttaaggagatgagaaaaagctttgggtg  
gggttctcatcagaattttgttcaagtactaaaggatgaagatgtgtgtaaatgggactatttg  
ttgccatgccctgatagcggaccatacagaggattatacagatgctatttcaaaatagtaaagg  
atgaaatttcgagtacagctgctaggatagaaaaagtgaaatggggagaaaatgccatgtgtta  
ttcatctctgggtgtgtgactagacaagaaggaattgggaaaattataacagatgtgctgcctt  
tcacatatgggaccaaataaacaatatgtgtatgataactataggcaattaatacacatttttaa  
tttttagattgttgactgggtgtgagtgataccaacacatcaaacattctcgtaggtgatggagg  
aaacttgttctctgtggacgagaattatgtgggcgcaaggatccgaggacagctctcgaaaat  
agaaagataaaggaactacaattgctactgaagacttcctttaaggtaacaaggtaacaagga  
agatatagatagctgtcttccatcttggctatattgatacatcaaaaagtgataaaataatgaa  
tgggtgtatgtaaatattggtaaaaatattgggaattgggtccactactttggatattgtaagaat  
aattgtacttgtattttaggggtcgtgaatgacctgctttatgacaacaataaaggaataata  
ctttatacaatttttcaatttcttcttttttaagtgtataaaatttttctaagacaaaagtga  
gtttgaggggttggtcataatctagcacatttcatcccttttccccttcttcttcttcttctt  
ttcttcttatttgaaagacctgggttaggtccctgctaagggtaggctgtaacctaccatatac  
actagagaattttactcttctccatctcaaaaacttttaaaaaatttttctgggtcactcgag  
tttagaggggtggaccgctgggtcggcctgatgtcaagttcggaggggtggaccgctgggtcgggc  
caatgtcagattgcaccagaaacgtctgttgcctcagaaacgtacattaatctactgtttc  
tggaacaggcgtttctggacacaccagcaccagaaagggtaggctgtaacctaccatatacac  
tagagaatttttactcttctccatctcaaaaacttttaaaaaatttttctgggtcactcgagt

ttagaggggtggaccgctggctaggcctgatgtcaagttcgaaggggtggaccgctggctcgggccc  
aatgtcagattgcaccagaaaacgtctgttgctccagaaacgtacattaatctactgtttct  
ggaacagggcgtttctggacacaccagcaccagaaaagggtaggctgtaacctaccatatacact  
agagaatttttactcttctccatctcaaaaaacttttaaaaaatttttctgggtcactcgagtt  
tagaggggtggaccgctggctaggcctgatgtcaagttcggaggggtggacctctgggtcgggcca  
atgtcagattgcaccagaaacattgcgtactactcccatgtccagaaatatctagatcctttct  
ggttctcgcccaccaccagatatctgggaagccttaggcgagtcagtgtttcttgaccatgtat  
ttctaggaatctcgctgacgtcaataaactggtttgtcatcctgttttatccagtttgctgacg  
tcaatagaccatatttgggcatctcgccacacagaaacaggatatgatcatagattctg  
gaagaggggtgtttttgtgccgatctgggtgtataaaagagcgctgaggagaggcagaaacatc  
agacagacttgatctgtacagctagcagcagcagtagcagcagccaagagaagatcggacgcaa  
accattctcgagccatggcagcagcagcagtcctcaggagaggggagaatctctcgagatctac  
tcctgttggaacaactcaccgccgagcagcagcagtagataagatacactctgagcagtacacca  
acctaggaagatctttggtgacaaaagtgtgatagagactattggacatcttctcatccacaac  
cacaaccaaggtgagagttaccaaatcgcatcttctgtgttgaaaaattccccgctctactca  
attgcatatggaatggagagtcgggaggaatggctctatggaaggcattgtacaggggctaaaa  
gtatagacttctcaactcacttttggtccacaagataaaaaattggccttcggttgccgtgatc  
cctatctacgggtcagtggtgacagagaagaaagggccatcatcatgagtgagattattgaca  
aggaaactcttcagaccatatgtaagagtgatatacgttctcttcttggaatgatgaacgcca  
gcatggcacattgggaggttaatttttacacttctatgcccgctcaactaaaccgtttgaaaat  
ttccaatatgaagcaatgggagctaattgcagtgctaattggcagctgaagctatttatgatggat  
tcagagaccatggcttaaacccatcagaatatacttttcttggtttggaatctgctgatgtgta  
cggaacaatccagtggaattgcaatatcaggagatgatgacaatatgttggtgaaacctcatc  
tgcaactatgggtgatcttatgaaaaactcgcggtcgggtaaatagatccttggttagattttt  
taaaaatgaacacagcttcaaagtgtctcagtggttttaaagtttggtgaaaaacactttaaat  
tgagtcaaatcaccaaaaaggagaatttgaagaaaaggccgaaacatgtgttaattgtcttgat  
agaaataatgtgttgactaaagggctcgaacaagaatcttacaagcttcttggtggacactttc  
ttcatgtaaaatgtttgaggaatatttgatagatcacacacctaagatgtgaaaaatgtct  
aaaaagatttgatgagagtattttgagaaagtgtacacctaacttgaattgggtgggtgactatg  
cggcaggtgctggaatgaagaagaaatatgtttcatgagaaataagaaactgggttgatgatt  
tcagaaaattggtgtcccctgtctcaattcctcatttcttcaaaaatagtagacagcgaatct  
tgatatgttggtgcccctacagtgaccacacgataataccaaataaagaagatccaaagaaaaac  
gaagatggaacagagtgaggggtcaaccacacagccatcagtgaaaagcagaacaaggaggaag  
aagacgcgaggataaagcgtgtagccgtcaggacatttacagccatcagagaaaagcagaacaa  
ggaggaagaagacgcgaggatcaagcgtgcagtcgacatggctgtcgcagccatcaacgaaaag  
aacaaggaggaagaagacgcgaggatcaagcgtgcagtcgacatggctgtcgcagccatcaacg  
aaaataacaaggaggaagaagacgcgaggatcaagcgtgcagtcgacatggcggttgacgccc  
caacgaaaagaacaagaaggaagaagacgcgaggatcaagcgtgcagtcgacatggcggttgca  
gccaccaacgaaaagaacaagaaggaagaagacgcgaggatcaagcgtataattgacttgactg  
ttgatatgaggattcaacgtatagtcgacatggcaattgcagctgccactaaaaggacaagaa  
agaagaagagaaaaggacaaaaaggggaacaagagttaagggtgatctgagaagggcaatggat  
atggtgaacgaagtacagaagaaacttgaagacatggaactagaaaaggggtgtaataaggatg  
aagccaagaatactagtaaatgttggtagtagcagtagtggttgcttattctaaagaattgt  
acctgttttaggaataataataatgctgtcattgggtatgactagcaccaactattctgccaac

aataactaagaataatgtatthttggttcacctcataaathtttcttcaacgatgcatctagattct  
ccaatattgtagaaactcccaaatgtctttcaathttctcggtcaagacataaaataaatgtg  
taacatgcaatactgtthtttgtaaaacccttggtgtctggataaaataccacacatctgtgaac  
atthcttgacacgtaaacactacgactthttctcaactcacacatctathttttgacatgcaa  
gtaaaacathttcttcaaaccctctacagagagatggatatataaggctttgtatctccatcattt  
atcactattcgtacgatgacgtccaacagaccaacaacatcccctcttctcggtctctgaaggct  
tctcgctttcaggggataagtatgatacgtatgaggatatcttacttgaacaattcaactgtht  
caagacatcttctccttcttctgctcgtaaaagtgaatatagaggataaaactttaatctttcaa  
cttaaagaaggagaaaaattccatcttgcaaggggcatagaagagctccgtgagattctagacg  
ataathctgcaacaattgaacctattathttctccaacaacattcaatgacagaaacgaattact  
aaaccacgaggagatatatcctcaagtccttatatactcagataatgaagcatatthcacca  
gagcatgatathttatgaattggacctattggtggcactgatttgctthttggtctagggtgga  
atctacgcaacgthttctaaactgatgaagaaaatatcgtatggtactthaaatgtagttgatgt  
gtgccacagaaaaathtttcaacaataggattatagttaatcccathttcttctcattctcaaaa  
aatgtgtgtattathctctathtttctgcagctgaagaathtttctgctctgggggaatgcaggg  
atthattcaacggtatthgtgatgacgtagagagatatcaactctthttttctaccctga  
aaatactactactactactgctccttctgctgccccgaaatggaaattgcagatgaggaagaa  
caatccccaaaaactataaagagaaatgacaacgcaagtagaaactggctctgggtgtctgtttga  
thtttgaaagtathtaaaaacacgtaactacattathaatagaggagatagaggaggttctthttga  
aaaggctgtgaagagtgaathttcttctatcaaggaaaagagatgtaaaatcacagatathaat  
ggtaataaacctcgattggthtatggtgataactgggtgttatacagaattgtactthcaagatg  
cacthaaacagattggagaaaaacaggcgcaathtttgaaaaatgaatgggaattactthtctct  
gattgatgaacaagcagatctaatcgaattctcgcatgagtgthttctgggtgccggggagaggatt  
thttgthaacggtthggggatgthccagaaccgtaaaatgatacctgtaattgatcctctcacat  
atgaaaatgthgtatgtgggtgagcatgatatacaaaaagaagatgctathttcttctgtaaggag  
agctattgcagactataatgactthgtagtaagaacaagagaggggaagaaacgcagcgcagaa  
gaagaaaatgaagatgaagatgcagacgctagcagcagcagcagcagcagctcctcctccttctt  
ctcctcctgacataaaaaatcacgtcttccggatgaaggcgaaaaatgtacactctgttaatt  
thttcaacaataaactaaccaccttgatatathtttgthttgthttgcaacaccctthtttatgata  
ccattaagacacgatggcggtaaaccttgataatgthcttgtgaaatcaacaacaaggatgaa  
gatcttcaaaaactcgtatccgaggcaataaagcggcgagctaaaactgtatthgacactaaaa  
atcaagcagggtthgacatgagacgtcaagthgaagctgcattatataagcaatatccaaaaa  
gaaagaaaaggccataaaggcattcgtatgagctcatacaagaaagaggtgatgaaattcacct  
ttgactacaatgcagtatgaagagtgggtaaaccgtacaataactcctcattgacgactgaaa  
atthattaggtgatgthtgagcagccgathttthtactggaccgaatgacaccctgaagcagga  
agatattgaaggthttcgctgcttctactthtaaggaggtatcagattcaaaaactgcaacagtc  
atagthtaaggcagattgtgaaacgggggatatcgatgaagtgataatcttgaccatcattcg  
gcgtcactcaagaaathaaaatataataggtcaacaathctcctcggaattggataatgtcgcaga  
thctthccatathttataaaathttctgcaacagatagcgacagtggaataactaaaaaathgttg  
tatgggttaaggaataaaaaagcaggttatacgtgthttgtgtagaathtttgcaaaaattgaa  
cagatgggattatggccaatacaaatatcgggtgtcgtgaaaacaacagagatgaaattgatga  
aaacgaagaaggtaaatatggthttthtaatacccaacaaccagctggtgcaaaaattgatcatc  
tacttctthtttaathgttggtgacataaaaaatgatathttatacaatgcaacccttcttgggt  
thctgggtctthttctgtgcttattgtaattgtaatgactgtattagctgtatacactgcacctca

aataaagaaatcgaagaagagaaaaattgaagatgaaaatgaggaagaacccgtaaagactttg  
gaagatthttgtaaagggctcggctccttaacgctgtcaaggaaaaacctgcagagtactttgagt  
tgctaatatctgcagacactgaagcagcattaanaaactgcccgaagaaacagcccttcgagattt  
tgttattgagaacgactctgtcgaatatagatgtggaggaagtacttgaagagaaaccaagagaa  
tatgtcttcaaattggcagggcgcaacaagcgaaacgctaacaacacaaatcatcgcagaggtac  
aaaaaaaggcagcattaataacagaagaagatatcactattaaaatgtaaaaacaattcagggc  
tgcaacaaagataataaagacggggaagcaactcctgaagaaaaggaagatthttaccaataat  
tcagatcttgtggggttgtacttgaacgaagtagtagaaaaacaacaatattgtcattaaca  
aaatattccctcatgagatggthtttgaaagatgtgctatthttaattgaagatthttgatactgg  
tgthgtgactgatcaagccattcagataccctccaacaatacaaaatcagattagtcgaaggg  
gatgaacctgaagtattccctggtgactgcttggatcttgcagthttcagthtgataaaataaacc  
acgtcttgaaaatthctgcaagaacggatgtgaaaacaactgcttcgthtattthccacggtht  
ctctcctgtaggaagtgtthcttccatgatattgggcagcactgaccaagtcaaaccctaaaaca  
ttcttattthtttagccaacaaaaatgacagtacacattthtcaattcacaatggataagcaacatt  
ctgtaggggtgtgagthtgacatgttaattthttcagaaaggaacttgaggaattthaccgattc  
aaaacctagaccttaagtgatgcagacatattggcctcatatgggaagcgtctaggaactggth  
gthttcacaacagaaaatthggtagacgattaaataaaaatthtataaccactthtctgtagact  
thtatgtcctthgtgcaacaaaaataaacatgtctthctcgtctthctgaaactcctaagactthc  
caccgatactggggaagaaaggattaaagacattgtaaatgctctagataataatggcgagtgth  
thgtctthctatattgatccgattatcaataattacatctcacgaaaaacggcagaaactgtcc  
aaaaaatcaaccaagaagthtgatgaacggtagcatagaaaaatagccgacaaaatcaacgaaat  
aaaatcatccatctthtacaagtgtcagactatgtatgaccaatattgcaatagacacattthcaa  
gaaggaaaaggagccaacgggactggaccagtcagggggccagtgaaacacggthtctgatacaa  
ctthaaataaaaatgaggggaaatattgctcgaatacgtgaagatatgtgggacggagatgactg  
gaaacgattthccagthtctatgacaacgcttgaattthgatctaagthtactctgattthactatg  
atgctgthgthctgacgggthtthtgcatthccctthccgthggaaacaaaaagataaagatggacg  
gthcaagaaagaaagaagacccaatttaattgtatcattthcagtaacatatccaacaaagtagg  
ggatgagthgggaagagggtaaagaacgtgaagthgaattthtaacctagaaagagtagacgactat  
gaaagagatatccatgthtcaattthgtgcatgthtacatgcacaacttgataattthcgaacaag  
cattaggagaaaatgcaaacctthtttattthtaaaaaggggcaaagagthcatgthtctthacca  
gaaatctaaactgthtcaatagacctactgtagaagattctgatatgthttctataatattthcca  
cctgcatctgaccaagatthttgcagatgatattthattatcgaataattgtaacatgthtcataat  
aaaattthgttgaaataaaaatacagtaatacattcaaaatctthttattthttctthtctaatc  
caacatatataatggthgatacattthacaggtgatacctgaaacatattthataaaaatcaggaata  
tacataaacatgctattgtaagthgtattcatatccctggthgatcatctcgtgccagatgcccc  
tcagcgagatggagctthgtgtaatctthgcccctgtggagthgctthgtthgtatgctctthgagc  
cctctthcatctcatgthgtgtagthtthcatccccctcacaaggctccatgataatattctthctg  
gccgaattatactthgtaatcaatgaggtattgctthgaaaggcccagthcaagatgthcgtthggthg  
tagthctggatgaggtcacattthctthggcaacattctthaaaggcggcagcagthcctthggcaga  
cattgaaatcgtthcaatgctthcaaaaatattctthcattattctcgtgacactthcaagthagthg  
ccactattthctcccacgctccgthcaacaataaggtthgcaacgthattctgctggctgthgtgct  
gthtctcaacaactthccctctthtagaagattthcaaccatctthagthgtacatgthcagatctcca  
attgthgtthgatgthcgtthattgthgcccagaaaagthtccctggcaaacctaatthctgaaggtctthg  
tagctthcataaggagthagthgtthattaatgthggtthaatgggcatagattcacagaatggaatag

ccagtgtatggacagtagcgtataccttggcagtcacattatcttcacatagagcattaataag  
agcactcttcttgctctcacaataaggcttcacagacttgtcgaagaggaccagaaactctta  
tcataatctacctccaccattgaagattcgtatgtagtggaaccatagaaaagataataagat  
tgtccacatcgacaagtagtagtagtactggctgttttgagatcaagtcctgatcctcctc  
atcttcacctcatccttcttcttggtagactcgatgtgcacacaatcctcagcagcctcagtt  
ccggcagggacaacttaagagacttgaggatagtgagacatggtgaatgagttggtgatgcatc  
cagaggagtgtctgcatagagatagacagacaggagttgatctgttctttgataggagagaaac  
atccatctcttccctcagattgaggatatttggctactgaagcagatggtctgaagctgttgtct  
gaagccaggtagagagggttcccatcgctctcgtcgaattcgcactctgttacatcccaaaca  
caacttctgaacactgggaagttgcaccatcatcatcctcatcttcttctgaatcttactgct  
actgctgataaacactttccttgtcatcttcatcctctactactggttgtgtatccttatcctta  
tcctcctcatcctcttcttcttcttctcagcagcagctacaacagtgacagatgaagacgaag  
aggaagaagaacacactgatgaggcgtcgtcatcatcatcctcggagtcttcttcttctcctc  
tgactgctcaccctcttcttcttctcctctacatcactgagaccgatagtttttctaataaga  
ttcttgatgacatttccaactgaactttcaatagtttcattggtgtaatcgtaatcaacttct  
cctcgttttcatcttctcgtcttcatcctcactgctcgtctgatgcatatgctgacttttctc  
ctcttctccaaatacagatattggtcagtgacttgaggttactctcctcttggccaaccacttg  
tcgttcttgaagcaacaacatccatttctcatagattcagtgacactttcttccacaatttgg  
tagtggcttgaatgtgttctcgtccttcttggtagacgaagaactgggagttgacatgacca  
tcagttgacttgattgactatcaatatagtttcctccaagttccttaaacagtgacttatct  
ccattacttccaaatatctgcctcttcttctccaaatccatctcgtccacataacagcatcag  
agagcttcaatgtgaagagagggcctccttatcaagggccttcttgttgagtgtttcaatagt  
cacgtgctcatggaactggagattcatacaaccaaggaatagattggccagtttgttagtatca  
gtggcgattgcagttttcttcacagcttctcctcaacttgacaatggtgtaaccagatcct  
ttccttcaaatgccgacttgaccttgagacacacccatcacaaaaggtggaaggggacagttc  
tgtcgtccagagttcatcacactattgaacagtagcatttctgcgccttcttattcttctc  
aattcttctcctcatcttctcgtcatttctccagaaattcagcaacagatttggccagaacactca  
cgtcaagatgagctggcaccttgccataagagcgtccagttcttgaagagattgctgcttct  
ctcggcggtgtgatttctggaggagtctgctgctgctgttcttcttctcctcctacaacttct  
tccacagtttccgtgtgtgactcctgatagtggtcctcctctgcttagagaccattcttctc  
cagcagcaaacttggccttgggaaggagttggttcttggcagaagtagtagtagtatcctcaa  
ttcataaacttgatctggttcctcagagaaagtgacagttggctgctgctgctgctgttctt  
attgactccatttttagaatattgggttattaggattcagtagttctgttattcctagacaaca  
cgtcttgtctgtacgattagtcgagatgatgtgatgtagagcccttgcccgtgcctcaatata  
accctcagtagaccttgataatcacggttgccaacaacaacggttggaatcttagtagaaa  
gaaccaatggaacaagtcaggataataataacagtagtaagcttttggggaacaacattcattt  
attgtcatagcgctaacattagaagtacaagaacagggtgattctgcatccagctcattttgtt  
aaccacttcatthgcaggggacaacactcttcttcttgaaaaataggatgaagacacttgg  
aattcttcaataggccctggggcgttggctggaggaggacgcagaagaagaagaacagctgc  
cgttgaacgagtttatagtttccagaagacaacataatttagctgtaattggacgaggagact  
cttgaatgagagaaaccacaaaattcttcttcccgtcttcttctgggtataaaagtagtccata  
tatgttcttcttctggactaccacattatcttcttcttcttcttcttcttcttcttcttct  
tcaagggctgatctccatttcttcttcttcttcttcttcttcttcttcttcttcttcttct  
atagttgcatatagaacagtgaggatgaaaggaacttgtcgggttacgtgttcagtttgtacaaga

taactggacgcatttgctagttctggaggacgctcctggtttttgtttattggtgaaagtaggt  
ttatctttttcctatttaagcacacacccttgaattaatgtgtatgcgattcgattgatgta  
tatgcagattgtgagtgctggagaaaatggatctcaaaatcggtagctggttcaataatttct  
ggttcaacttctctggttcttcttctcctcatcttctcttcttcttatttttgacacctagaactc  
taaggttggcagtaactaattattctggctgcagccgtgctggtagcagaaggggaagattggtg  
ggagataacaggagacatgttgaccgtgccgtgctgtaggataaatggctaaaggtatatac  
gcatgcccttttttccgttactgtgtgaggtcgtttctaggaccgtagatgaccatctgcc  
ttctctctttttctggacaacctttaattgccatgggtttatgagaggtaaactcgctcata  
gaatccgcaaacttctctaaagggaacaagtgttccccataggggacaattcaaaaataaa  
ttccaacatattaaggggtgtgttttattttcttttctcatcgtaactccgttattgttttactaa  
aatttgaaggtgattttttgatagactatcggacattatccgctgcaagttgacgtttatg  
ttcaatgacataatcattcgaatcaaagttgtcgtgtgttgacaccataccattccatttccat  
ttggctagtttggagagggatttattgttgcgcaatttttagacgtgcagaaaacgttttgccata  
ttatttttagaaagtagcaggcaaaaacaacatccctcacgtcaatactgtccattaatatacagt  
agaatcattgaaccttataacatctctctgtatatacttctgtttgatggggccaatcgaactaga  
ggaactaaatcccagttatgagatcggtgaaaataaagctctcgtcatcaacaatttttttg  
agcctatgtacatctcacacttactataaaagtcatttttataccctggtttcttttcccact  
agaacataagagtattaaaactctcgacaaaattatacatggcacctactcttcttccatatta  
ctgatagctctatacatattaaccacgtattgtataggtgcttctacgtacaaatctgaaaatc  
cactagcggcagttccttactaaaggctagaacttgttccatagtccttcttcttctgaaaacat  
ttgctgaattatttttagtggatagtttgtgccgcttattgaattttgtgccagggtagtgggac  
ccgaattcgttgaaatgttgttgttgttttttccctacttctttagtttcatgccagggcgggt  
gttcttgaagagcagccacctccaggaacaaatcacagatggctcgtactccatcacatgtgca  
ttttacagtttcagggaaatttaacctgttattttataaaaactctctgtctattattttt  
ccattcgtagggcattattgacattaaaccacaacactcgctctgattcccattataaagg  
ctaaagaatatactataatatttcccgcacttgaaccacagagtctaagagttgtatattctcc  
atcgcagttatagagacatcttgccaattcgtccattgatttcttgcctggaagcgcacatcc  
atgagtcctgctcctccatatccaatttcagcgtttattgaagtcctccaacctttatccttgt  
ttagggcgtgtatctttttcgccttctctgccaatacattcataaaagtgtaaaatttaacgtc  
tcttacagattccataattttttcctcaagtgttagcggcggcgggtggcggcgatccttctttg  
tagccttcaaagataaaaagagtgatttcaacttacagtgtttattggcccagcaattctttt  
tttcatcaactgcatagtagaaggtcgatcggaaagaatgaccaatttggaatccaaatcccta  
ggtttatctagtccagcttctatgtccatactcttctcctattatcatatagtcttcaaaca  
gtgttttattagcagacatgttaatcatttcaattacagtctggaggcatgtttcatgtctatt  
gaccagatcttcatcatcttcatcccatgtcacaccaccagaatattttctcctttcttgagt  
ttggatacattttctgtaatctttttcattatccgttgtttcttggacgccacactttcgtagc  
atagcgtcggtaggggagagtcgcaatccacaaccaagatattttttcatgattaatttgttgag  
gattgtgttctttgaattgaagaaaaaatcattcgttctgtaccatggagacaactatggata  
atgtcgttcagaataacgacgtaacaaaaccaaccagatgttgctactgttacaacagcaac  
tgagaaacgtcagtcatgcaaagagaaaaaggatcaacttaaggccgaatgtcctcaagtactg  
agagcactaaaattgtccaatactttaaaggcaatttttgaaaatccatgtcggctatttttg  
ctcaacatttagtggacatgacaaaacgctaaacactttaaggacccaaagacaaagaagatttt  
agaactggatggaagtagtagcagtgacagtgagaagaggaagaaactagttcttcatccaaa  
cggaaaagaggttagtgggtgctagaagtgcttcttcaaagaaaagaatgcccataactatca



aaaattggctcaatgatgctcaaggtgtattccgccagtttgcagatatcatcattaatcttcc  
ctcttttgatgatcttagagacgaagtaaaggatgaacaaactgagctaaagaccatataatgac  
ttgtatagacaggacatggaaaaggtggtggaagaagttttagggcgccaagacctgtttgatc  
acaagtcagaaatagccaaaggtttggcccgtttcgatacccacgtctcgttgctcccttcgga  
taggtcggctggttctagactcgtccatatccaaagagttggaaaaaaatagcaagggcccgaac  
agtaatatTTTTGACACACTAAACACACTCAAGGAAGAAATCAAAGAACTTTTATGTATCATG  
TCAAATATTTATTGCAAAATCTTACACCGGAGGATGCAAATTTTGTGTTCAATAGTTCTGTA  
GTATGTAAGAAATCATATCAATACTACATACAAACATCAGAGATGGAAAGTGATGAATTTAAG  
TCCCTTCTCACTGGAGTCAACATTAATAATTGGAGAAGATAATCTCGTCCGATAATAATGTTG  
CTACTCCTTACAAACACATCACTAATCCCAGGAACATTATTTCTGTTTACAAAAAGTACGTGA  
AACTAAACCTGTTTCAAAGGATTATCCGTTCCAGAGTGGATACGGCCAGAGATATTGTACTACT  
CCAGAGACGGGTGGCATTCTGATCTCCCTATCAAGCCCCTTACATTATTGCAGTTGGTGTCT  
ACATCAACGCTCTCTTTTCCCTCGAGCGCCGAAATGTTTTACCAGCGGCTTTTTTAAATGCAGC  
GTGCGTCTAATTTCCAGTGCCTAACGAATGCGAACCTATTATCTAACGACTTTCCTAAACCC  
ATTGAACGGCAGCTAATGTTACTCGCCATAATCTTCTGAGTATGAAAATGCTTCAAGAAGGT  
CATCCAGTGAAAAGAAGAGTAAAAAGAAGGAGAAAAAGAAGGATAAAAAAGAAGGGCGGTGGTGG  
TGGTGACGATTCTGATTCAGAAACAGATTCTTCTCATCATCATCTTCTTCTTCTTCTTCTCA  
TCTCTCTCTCTCATCCGAAGACGAAGAAGAAGAAAAAGGAGAAGCAGTAGAAAAAGGCAAGA  
AACTAAACGCAAAACAAAAAGAAACCATCAAAGGACGACGATTTAGATACAATTAGTAAACT  
GATTCTAAAAACAGGAGGTTACTTCCACGACACGAGTGAACTCGGCAATAAAATTAGAAATTA  
ATAGACAAGGATGATTTTGCGGGCGTAGCCCAATATGCAGTAACAATCACTGAGATGCAATCTA  
CGCCAATGAATCAAAGATTAGTATCTAGTCTTTTAGATTTGATAATGAGACTAAAAGAACAAGT  
AAAATATAGTGTGATACTGAAAGTACTTCTCCACCGCCAAATCTAATAATGCTTTAGATAGT  
GCTAAATTGACATCTCAACAAGTGGTTACAATGATGGTGGATTCTGGAGCTGAATTTGGCAAGGC  
TAGCTGCCTTCTTTTTCTGTTGGTGGGATAATACTGTAGTTAATCGCCATGAAGCATTCTTCT  
AACATCAAAACTTTTACCCTCGAATGAAAATAGAGGACTTAAAACCTGTTGTAGAGTCATTCTT  
AAAAATTTAACAATTAGTAACAAAGTCTCTACCTCGAATGAAGAAATGATGTGCGGTGATGCCGT  
TCGAAGACGAACAACAACAACAATGCCCTCAACATGAACAACAACCGGATTTGAAAAGAGT  
GGTGGGAGAAGTATTTCTAGAAATGGGAAAATCAATAGTGAACTCATTCCCTTCCAATAAGAGT  
GTACAATTAACGGCTGACGCGTTCAAGCAAACTACTCGCCTATGGGAAGACGCATAAATTTGG  
CGGCCAAGATAAAAACGGCTATATCTATCGGATCTAATATCTCGCCCAATATACTATTTTCTAA  
CCTCCCAGAATCTGTAGGAATAATACTGTAACCTGGTCTAAGGCTAACCAACCTATTGAAAAAC  
ATATCCCAAAGTGCCCAAGCTAATAATATAATCAAAAATGCCAACACGCTCGTAAACAATACGA  
TGGACCAACAAAACCTCAGCAGCCATGTCCATACTACTCTTCTCCTCAACATCAAAGAAACTTC  
TATCTTTCCCGGAAACGATCCTTCATCTATAAAATTACAGGATATGACTACAATGTCAAATCTG  
GCACGAGGATTTTATTCATCGCAGAAGGATGTATCGGGGTCGTACGCTCGAGGGAATTTGATG  
AAGGAGGAGTTAAAGCGTACACTTTACTAGTGGACTCAAATACTATGGACATGGCAGTTAATTT  
TGCCGCTCAGTCTCTGAAAAATCAATGTCTGAAGCCTTAAACAATAATGCGAATATGAACCT  
TCTAATGTATTAGAAGGAGGATCTTTTGTAGACGGTGTCTTTCTTACATGTTTGAAAAAATG  
GCAGTGACTGTGAACCCACCCCTCTAGCAAAATATACAATGAAGATGTATCAAATCGATACTT  
GAAAAAATTCAACAATGATAAAAATACACAAGATTTATATAAAAATAGAGCAGAAAGAGCACTC  
GTCGAACAGGTTACAATAAGCCTACAAGTGTGTGCATTCCAGCTAGCAAACGCCATGGGGG  
TAGCTGTTATAGGCGCAGCATCAATCAAGCTCATGGAAGCAGAAGCAGCGGAATCTGAAATGAG  
AGCAGCAAATTTAAGCAACATCAAAATCTACAATGCTATTAATATAACAATAACAATTTGGA

atgatacgtataactactcacctgtgtacgaccatcgccgtgagtgagcgcgacatgtcaa  
agctcgccaacaaccattttatgagtgatttaaacactgcaaataacagtcatagcagcagacg  
aggagacagatcgtccctgatggtgcagcaacaacaaccaacacattcagcatttctggaacag  
acaagaggaagaggaggaggtatttaggatcaggaactgaacagacaaaaggatcatgtggaac  
gtatgaagagagattggatattaacatgatatctccagaagacaaaaataactactactactac  
accagtaatgcccggccggacattaggatattggatctaataactggcataaacacgataaaa  
caagacgacaagagtatgatggataaaactttctgagatgtctagcttcagaacttaaagtcca  
atthttcatataaaaatgtagtattatgtggtcgthtttaaaactttaagcgtttgtggthttggg  
tcgthtcacgggtccaagatgtaagagtccccttgtacccaaattataacaaagtgtcagtatgg  
caatggaaagtatctaaaaatccaccctctatcattcaatatcccaactgaaccaaccaacc  
cagaaccaacaacatgtctcttgttgagaataataaccaagaagaaatgattctggaaactact  
gthtgaaggtgthtggaggaggagcagaagttgcccctagagggtgtcaagagacccttcttctt  
cctcatcttcttcttcagcttcggatagtgaaagtatgaaaggaggagagcaaccacaaaacgaa  
acccccaaagaagaacgtaatatcaatagcggaaagtactggaaaatcgaaacaatcgaaacca  
gcatctccagaaatgctcagtgctgtaaatgatattgataacgtgtccaaaactattctcttaa  
tcgataatagthttggcgthtcagthttaaagagtgatctgaagaacagatcaaacgctact  
cactgaaactattgcccgtggaatatggaacaatcacaatgttaaatattcaacctthaatcaa  
ctcgaaaggaccggagagcctcttaagaagaagcgtcaacaatggaataacaactacagat  
actggcaaatcgaattgaagccgctgcagcagagaatgttacacaagctgthttggacgcaat  
cgttgaaggaaatgacaccgtgatcaaggcaatcctcctcctgaaggggagggaaatcgggctt  
caatthtaacaagagtgthtagctctcaacaagctaaaaatattgtccaggctgccgatattgaa  
thtggacaagthtgcacatgaaagtgaatthtgtccacaagatggagaaggccgatgaaatcttc  
taatthcttctggtgaaatcaccaaggthtaagaagtaaggaggaacaagtcccagcctacaaat  
thtactacactthtactatgatcggggattthcttcaagagcgtattgataacgcaatcaaag  
thtatcgaaatgtctccagthtaagaggcattthctcaatthctgctgctgctgctgaagaagacac  
cactactacgaccactactthcactggtgthtgaatccacgagggattaaggatattcactth  
thtcatthcattthtcaaggatgththcactgtgaggaatattgthtgcagcaaatggtgaa  
thtccacaagaagaatthcgtthtctgagthgtacactaacctthtcaaagthtgaagagaagthtga  
thcatcctactthtcaagaagctthtcatgaccgtacaatgaaatcgacacattaaggcatggtac  
thgatctgcccctactacaccacaggaggcgtccccctgcagctgataaggthtccgctaaag  
gaaatgctacctacagaatatacagaggacaggactggagtgthtccaatthcagatggggcacatac  
atctactaccccagcacaggcagccgaggcaactggtgctattcacaagthctatgctthtccag  
agthcctggaactgatattcaaaagthtctcagatgctaaagaaggcagaagthtggagcctatt  
catcgggcaaatthtgtgtaccgthtcaaagthtgagccccaatgatagcagggcaacacgctgct  
caaatthtattthcctthtcaagcagagaagatgaaatthtctgatgthttthtctattgthtcaact  
gatggactthtctagtagtgtaactthtagaaaggatactatggaatattgthtggthtcaagagca  
agagthaaaatthtccccaaaactatcaagatthtaagaaggaggagatactthtccatagcagga  
ggatattgaaagthcctgthaaaatthcactgcaatthcctcggaggaaactthtaagggaatgthaac  
accaagggaatgaaacagctccgagcacacaagaaacgaaagagcaactthtctactactacta  
ctthcaccactthcactthcaacaacagcaaaatactccaaagaagacgaaagaagagcgtthtctgc  
thcagtgaccctthtgaagctthttagattatgthttagatgacatthtthtattthtact  
aatatcagthaaagaaatgthtgcagagaatthtggctcaggagagagthaaagacgcthaaggcag  
thcaagaacgaaagagaagatgthaaatthttagaggggagaagaagcacagaactthttagaggaa  
cgtaaagatcaagacgaaatgthaaaggcatacaatthtgcacaaaacatctggagthcttht

cctgctgataaggtgtgtctaaagcacacattggaagatttgggggatgtacttgattttgatg  
ttgtaagggaggataatgttaataagacggtcgcttctactactacatcatctgaaaataa  
ggcaagcggaggagatgatgaagaaactccaatggaatttgaaactgacggagagaagctggtg  
cacgaattggtgaatgaataatggtggtgtgtgtgtatatttgtatatagagaaaagaataaaata  
aaaggttaatataatggtgtcttttacattttcctaaacttgatataataaactatatagcaa  
tattaatgctattgacacatggtactagtcacctagtcacgtgtaattgtacatagtaacatgc  
cttttcttaggcatttgaggcaaataggaaaagagtatttacgatgggtgaccgtcgtgataac  
gcctacaccagggtgacagtatagagggtttcagcagactgcaataactcacctaacaggccttg  
gtatagaggaatcaataaaaaatcaacaaaaaccttaaagtttgggtgtttcatttttttacat  
cggggacagaaatggggttaaaaaacaaatatccgagctgcaatctgacattggctccctacca  
gaggtccaccctccgaacttgacattcagtcgaccagcgggtccaccctctaaactcgatcgag  
ctgaaaaattttttgaaaagtttttgagatggagaatgagtaaaattctctagcggaaacagta  
ggttacacactaccctttctgggtacgttcatatccagaaacgcctgttccagaaacagtaaaag  
agttaatgatgtttctggagcaacagacgtttctgggtgtaatctgacatcgagtcgaccaga  
gggtccaccctccgaacttgacattcggtcgaccagcgggtccaccctctaaactcgatcgagct  
gaaaaattttttgaaaagtttttgaggaggagagaggaggtaaattgatacagatagaggtatc  
tttagtagaggtggtggtccttctaggagctggtgtctccagaaacgcctgttccagaaacagt  
caaaagttaatgcacatttctggagctatcccatttctgggtgcaatctgacattggccctacc  
agcgggtccaccctccgaacttgacattcggtcgaccagcgggtccaccctctaaactcgagtga  
ccagaaaaaattttataaaaattttgagtcggagatagaaggaaattctctagtgaatacagt  
aggttacacactaccctttcggggcgcagcaagtctccagaaacgcctgttccagaaacagtca  
aaagttaatgtgcgtttctggagcaacaaccatttctgggtgtaatctgacatcgagtcgacca  
gaggtccaccatccgaacttgacattcggtcgaccagcgggtccaccctctaaactcgagtgc  
ccagaaaaaattttataaaaattttcgtcaagggaacaaacactaagttgcttgtcaattcata  
cactagtgcaggttggttgagatagagagtgaaggaggctatccagatatctggatcaaccaga  
atccagaaacgttctatccatttctggaacagccatttctggaagggttacattttattata  
tttggtatattatttctgggtaccacttctggcacattcgtgcaatctgacattggccctacca  
gcggtccacccttcgaacttgacatcaggccgaccagcgggtccaccctctaaactcgagtgc  
ctgaaaaaatttttgaaaagtttttgagatggagaacgagtaaaattctctagcgaacagaa  
ggttacacataaccctttctgggtacggtcagtcgaaacgtctgttccagaaacagtcaaaa  
gttaatgtacgttctgagcaacagacgttctgggtgcaatctgacattggcccgaccagcg  
gtccacccttcgaacttgacatcaggccgaccagcgggtccaccctctaaactcgagtgcagctg  
aaaaaatttttgaaaagtttttgagatggaggacgagtaaaattctctagcgaacagaaaggt  
tacacctaccctttctgggcgcagctatatccagaaacgtctgttccagaaacacacaaaggtt  
gatatacgtttctggagcaacagcgtgacagtagtttctactaagccttacttgtacacattt  
cacttagtataatttgtcatcacatggtcgcacaaaaattttataaaaatttttctgggtcgtc  
gagtttagaggggtggaccgctcgtcgggtctgatgtcaagttcggaggggtggaccgctgggtc  
actcgatgtcagattgcaccagaagttggtggtgctccagaaatgggtgggggagatattcagagt  
gtgtttctggaacaggtacacatacccaactgatcagataaaaattgggtgtatacattttctg  
atccgagaaagtaaaccaactgaacgggtgtaaacgtactgaaacattacatcccacagctc  
tcctcctcccttctaagagagaacatatcccgtaaccaactacctcaacaacaacaacaaca  
caacaacctgacatccattatggacgatctctacatgagctgttcttcttcttcatcgtgctc  
aagttcatctgaagaggagaatgaggtaggagtgaaggaggaggaggcagaatcggaccaaca  
gaggccaagaaaaagatcctccgtaaacgaaagagatcttctgttaaaagtacatcatcttctt

cttcctcatcatcatcatcagacgattctgactctgatagagaagaaaaagaaggaagaaaact  
atacgtggatattgcagatacaaggaaaccgccc aaagtaagaaaactggatactccttcacaa  
actttagagaacgacctctacatgtctagttcatcttcttcttctcctcctcatcttccgactcat  
catcgtcttctggtgaagaagaaagtgacgatgatgatgacgattatgaccagataaatgt  
ccatgttcttggttgtaagaaggaaaaatctccccaagacatagaagctgaaaaggaaaaggag  
gaagagtatgaagaagaattcaagagaatggcattaccttcacggataaacacatctgtagatg  
attgtgttataacctgatcggattttaaccctcttttctacacttttgaagaaaaatagtttcca  
gttctctcagccagtttctttcctccggttggtgatgaagcaagtaaacgaggccatgaattca  
gcattctcttccatgttatccagttctggtatgaggttggtggaggactctttgggtgacacat  
ctaaaatttctcctctttataacacctcaaacggataactagtaattcatcttcatcatcgacgtt  
cgtcaataattgtacagatgaagatatcaagaagcgtaacattgcaatgggaagagtagcagaa  
ttgctgtcaaatattgcagccagttcta atgaggagaataatttccgcccctgtagtttcccttaa  
tgcgaggaccaacttggtggaggttcta atgcatccaacaagaaactcaatagtaacaggcaaac  
tattcccaagtattaacaagggttatat ttttttagagaaatacacagtgttatcgcgctatat  
ttatcgtccgtctgtgtgcagcgcagcaatgaataatgacaacacaaattctagcggatacgtg  
aagggatggttactaaaatcttgaatattattggtaaaattccttataatgaaatgagtagaga  
aaaattcatatccgttggaagagatgcactatatttgtaccagaatgtgatcacggatatgact  
ggcccaaacataacaagagactccgtatccctcaacaacaagctgatttttgttacattatag  
ccatgttggtta atgatgttccattacctcagatttacttttaactggaaaggcgacaaattt  
agtacaatttgcttctgctatggtggatcctgcatatcgccctggctgtccataaaatggcgtct  
gttttcaatagtagttattccgtatataa agtcctagatcttgaccataaaatgttattaaggg  
ctaattta atcctatctat ttttatcagctagaaataagtgctcagtgaaagaaaacctagaac  
attaactcagagcgtgtatttgttcctaaatcatcttttgcggaacaaattgaggtctagtggt  
ttgaccagtgaagagagttctctaggaacagccgtaaaattggtgtcacagcaattaatgtatg  
aggggtgtgactcgtcaaaccatcgaggacggatgtagcatgattagcggaaactttgaggatga  
agacgggtgtaacactgaaatgtttgggagccgatgttaaggacgtgaagactgttggactatct  
gcattgctatctgataggcttagaaaaaacattagaagaaacgtccctttctactgaaaaaata  
tggaactactacgctcgtctttcattgcaatgggtttgcttttctggtggttgatgggtgtacat  
ctttatacagtacacgtcatcaataaaaaacaagacagaggaaagaaagggtagtaaattatca  
tcatcatcaacttcttctacttctggtccaacattttaagagagaagcgtctcctgaattaagag  
aagacataccacttctccacgatcttctggtccagaactgaatctaactgacgctgaatttat  
agaccctgaactcttttctgaagccagggtcagtc ccgaccgtaaacggaaaaaagggtgcaaac  
cggcaactcttctccctcctttcgagtataagtagaggcgttgcaaccgagccaagcatcattcg  
ggctcattcaactgtgctgacaacaactaagaatatacattgaaataacccaaataatcaactt  
ttcaagatgtttggaagttctgctaataactttaatggtgacaagaaatcttctcctcatcatcat  
cagctgccgcatcatctgacgatcagcagttagggtcccttggactgtctactgctgatttcaa  
gaaagttgctgccattcttgccaacagaaacagagtcctataatctggtgccaagattctccaac  
tttaagaatgtgattaacaaccctaaccagatatctattgtgccgtttctgggttcatcgaagg  
cagctgaaagtggtagtgcaacaagaatgaaaaccaggctgaaaattcttctaaaggaggaag  
tgatggaaagaaatcatcgcagcagaacaagtttaacctattgaacaaggtagaggctgaagaa  
atggcctttaaacgtgtggtggaactcattg cggatactcctccctctaaagataatccattga  
gggatgaccctgatgctattccatcacgcaaccatgggtcaaattgactcagaagaatctgga  
atatcttttctgggaagcagtaacaattgaagctccaatgataggagatccgtagtggaaga  
tatcttcaagccagtgaaagtgggggagaatccattccta atgaccatcagtggtgacattagaa

tcttgcaaagaatggcacttaatgtcgtgtggttcttcaacagattcttccgcatggtttctg  
acttgagtagaaaaacagggccaattccacctatgttagcaactagcgatgctattgccagatc  
tgggtagagatgctcctcaagaactttatcttgagaaaaatgtgcccaggcactgaagtatt  
tgaaggaacattatgagcatgtttataacaagatcagtaaagtgggacgtcagccatcctattt  
tgtgttgaaatttgaagagtggacaacacgattggatttgtcaattctgatactgaacataat  
ggatcatcatacatggaatacaggtgctttgacacaatcaggaagaatgcatcatctgggcca  
gtggaggcggaaagagtgggtgtcctgtcttctggaacattcttcattgataacgaaatggggaa  
taacaatagtagtgcagctgcagcttctgccccctgctgtttctgctggagtcttccatcactt  
tctccatttagcagtgatggagatgatgatgacgacgattgtagtggatgacgtgtggggga  
agaagatgatattcaacacatcaggagacggatcaggagaatcttctgggcagaacgggtggg  
tgcatacaacttacaagagatttaggtgtggagaaaatactgcttctcttctcagaaggaaaat  
gttcgtctcatggcgatgccaaagggaaatgaagataaacaactactcaagaacattatcaact  
ttctgaatagtgcacttaactctgttgaaaaccatgtaatgtgtacagatgaaaatatcttca  
tgaggatcaagccgagcattatacgtcaaacaaggaaactatacaaggctattgtttgctccaac  
ccagccaatgtgtacagagtaatgggtgaaactgtttgtcaaccttattcttccccgtcttagga  
accaattgtgagtgcattgaaactgtacaaaactcttcttcaacaatggatcgggtgagaac  
aaagaagatgggtgaaactggatgtacagatatgcgctatgacatccctccatatgcaaaggg  
aagattcgtcttagtgccaagagagcttgtgagtgcagaaaactgtgcaaggacgtgaggtgct  
ttgacaagtctagagaggcaaatctcaccctagccagaaggcaggaagggaggtggaggaacc  
tttccccgcaaccacaattctcacaggagtaacgctcacgactttactttctatgacaagtac  
agggcaaggatgaacaagctcaagaaggattcaagaagaaggtaaagaagattgacaccttta  
caacaacagacgattttctcctgcaagataggaacgcttttgatctacttagaaagtgttctc  
ttctgcctctcttcatcacattttctgtcctgatgtgcttatgggtgcatagaggagacagctt  
aatattaactttgcaacaacaaactcgagtgtataatgaacgtaacggaattgaagaagtta  
cttctcacaacgggtcaacgccaaggaagcacttgaggatattacaaaaattaaaatgaagag  
aggggatgatattatagatgttgtgaaagtaaaggactttctttgagggaaattctctaagaag  
gttagtaagattgtgagaaggttaatgagatcacaaccaaactctgcaacaactgcaacgtta  
actcttctaattggagatgtggatttccacgtctttacttctgtgtgtgtctacatccacaacat  
tattcctgtgctcgaagatatctccatttttgagaattgggtgaagaattgaccaagcttgtt  
aaggagtgtagagacgtggctggagaggacaagacatatgatgatattatccgcaattacgaaa  
ttactgtaaagtaactttaagctctttaatgcactcgttaaattctgtcacaggaattataatgt  
ggcagtaacctctgccattaacaggagaggggtacatgtgcatgggtgagcaaccttgtcgggtat  
tattgtaagctgtctgataacgctatccagtatcacgaatcactatgctctttgactctagca  
tctcttatgcagactattatacgtctcgcataaacaattctgaagatggaggaggaaactctt  
ttcagaaaagagcaatgcagatgtagccaagactatggcctctttctatgaccagttcgataag  
agtgaagacagcaagaaaaataagaacaaaacttcaaattgagatccttataaaaaatgttccaaa  
tggatagggttttggatggcatggatgatgatgatgaagatagtgatagtagtagcagtga  
gaatgaagaggaggaggaagaggaggaaattgtaaagaaccagcaagaagaggaaagtggaa  
gatgttgatagcaataagaagacactgccaaaggaacctgccgttaagaaggtgaagcaggaag  
aagatgtggagatggaggaagtgaaggaagcagcagcagaagaagaaaagaaagaggaaacagga  
ggcgaaggaggaagacgctactgagtatgacgacgatacagaagaggacgagaaagcagtagca  
tctgatgaagatgaagatgatgaagattctaaagctattttctaaatatcatgtgtataaaatg  
tagtattttaaaggtataaataaacacaatataaagttaaacattgttttttatttgacacatg  
tacatcatcaatttcacatgggttatatttctttagcttgcctcggcagcaataagagcaagaga

agagtcataataaaacagatgtctgtgaagcagccatgatacccctcgatatattattaataaagg  
ggagttgctgctatattaacagcataataaatcagggttcttccaatccctagaagcccacacat  
tgggcatttttatataaaaatcaacgtctactattgacctggcaacagccactatacctagctc  
atcaatgtaacaatcttccccctgaacacccattacaatttttgatTTTTctgaattctctcgt  
atagcagcaatacgggctagcttcattatTTaaccattccaatTTTtacacttgaaacataagctg  
gggatttttcatcagttacttgagatacaatattattccattgagataaaaagttcctccaattg  
agttgtagtcttgtccgcttgccttggaaactttgcatgacgatagccgaatctcttgttgca  
gtttcgatgatggaatacagttgagccattgcatgtcagtaaggatatggcgcggttaactg  
gaacaaacagattctgtgcaggagaaaagttcaagtcttctggaatcttgttgagggtgatatt  
gtccttgggtgtgTTTTcatgggataggTTTTctgtgccttTgaagcaataaagtatgatgggatt  
ctactgtatTTTcttagtgTTTTctgaaatgTTTTgtcTTTatacggTcTTTTcttccatcatccc  
taatgtaattcaaaagTTTTtagatgtgaatagagaagagtctctaTTTTTgcatTTTgttcatt  
gtgaaccttataatcctcgggaacagtatTTgttattattagcctgcctctgTTgacgctgctgc  
tgttgttgttgttgagtagtacttccaatgggtatTTaattTgtccaatattgaacgtaattcta  
caggcaccttctaccagttccaagagcacctccaccgccgatggccgctgcagcttcttcaact  
agcttcatcatttataaaaagtctccccgaagaagcatagcgtaaagatccatacccttcattt  
ccagtatcaatagtaatcccattTTTgttcagctgTTatcTTTTccagtatttcttcaatggcct  
ttctaggatctagtgaacatataatccatcgaccataatagagacacgtgctcgcacacttc  
TTaataatTTTTcatctcttctgTTgctgacaagcatcatcattctagatataatagtagcaata  
acattcctaaattTgttctgaagaaatagttcgatctctgtgaacgtaggctcgaaacgggcag  
gcacattaactggaacaaccgcttgtgTTTTcttgttgttgcTgctgTTgttgttggatcgc  
tcttcttgttccaccacctaataattactgcctctgagttggTcggtgcaatagcaatg  
atgtTTTgtacacTTTaccagattctgcaattacttccatTTTTgagTcttgcctgaaattg  
gtacagaaggaatcttgggtgacaaccttctagagttgtgggtaatccagtatcatactgaag  
aactttccaataaattcgaatccagttcctgccactgtgccacttTactggggaaaatcgc  
atcctccctgtagatagaggactaacacattccttatagatcctcattgggcttaaatgttTgtg  
tcgatttagTTTTgaggcttcataaagcacagcagacgagagaaggggtTcaaagaatacagT  
ttccatgcccattccttTaccgaatattTgactTgtttagatgcatgaacaggaagattTgtg  
ggctgagaagtcgtaccagggaggaatgcgctaacatgttcaattTccatcaaccgaaaaac  
ttgtccgtacaccatcaacgaatgaagaagaagaagaaggggatccagTgtcgtcttgatg  
gttattaatataccaatttccatatacTTTataccatcatcgcgttcagTattctttacaact  
TtaaagtagcacaccaattcacTTTTattTTTTcaatccaaggaatccatcttctgcgatattct  
gaccatatgtcacatttcttgttagagatttaggtggTacataattTaaagaacgattTtgaat  
ggTTtcagaagaaaatggagcagTggcagttgttTgctgctgTTgttgtTTTTgttcttagag  
gatatttagaggTaccattaatgaaaagttccagatccttattcatctTtaaaaaccgtcctgTg  
gtacaggaagattaactaccctaataaggggttctgatgaatatctggaggaggatgatggaga  
agaagcgactgaagtggcagactTtaagtTTTTcggtacattatctccattcaaaatactctga  
ggTgtatcggTcagTgtatagTatctgagagacgtatcattTtacaataaagggaggatctc  
tagggaaagcaaggcacacgcctcattatcggctgccgaatgaataactgcataatgtgTaac  
aatctTtgcaattagatccatcacgggcttctTgaataataaaaattTgtgTTgatcaggatcg  
gctgtatattTtagtagcactTcacgtactatataatctgttagttgtctagcctcctTtacag  
ccatacgcctgattTcaaaacgcaatcaaaaaatggaagaagaacaactTgaagtacctgctg  
gtgcatgtacatccaagcggTctcatccactTtcactggctgTcctctcataatatttctTgtc  
attgTTTTctaaacacgaccgataaagaccaccacgcagTTaatgggatcgtaccatctgTact

gccgtccataacttcttcttccggccagtataggctcccctgggaatagtatggaatcgcagtt  
agattctcttccaatattgtatatggatgcaatctctcgagcaatatctcctaccgtaatagca  
gatccgcccagagaaaagtcacacaacagcatcagagacatttgagaattccctcccttctagat  
ttacattattataatataatcagagatgctattatagcagcagaagattccccagaatcgtctct  
cagaattaattttaacgtaggaatatcaacatctgggtataaaggctgtagtatttttgaccg  
aatgtaagaaaccttccagaatcgtgtattttccgacacgttactttttctgtcgacaacgagtg  
ttttattatgttcagcgtcgttaagagagggttaaaaaagggtgcatttctatccagtctgtttt  
ctccgatatacagtcctatgattgaagtgtattgaggcccaaagaagcaagtaactgggtttttc  
atggaaatggaagtaggtgcccctgaagggacaatggtgggtatcggtagaagttttttgcctct  
ttgtacgttttctattttcatcgtattccttagaaagggtggaagatacatctcctaagattt  
tccttttagacgataaaaatcgattgtgcgattttttccttttgttcggtcgtcaatgaggcgggt  
gaggaggaggaggaggctgctgttgctgttgctgttggttcataaagttgggttgaggtttat  
ttttaaatgatagttgataataccgtgtaaccaaatacctttaagaattgggtattttttccaaa  
aaagcactgggcccgtaaagtagtgcataccaaatcagtcgagttaaattttgacaactctgggt  
atgataatggaagaaactgacttggagtttgaagccatgtcatttaaatcacgtagccttgtaa  
gagagggatgttgatagagaattttctttgcatttgggttcttactgggtgtcaggaaatgctat  
ctggaggggggtgtttatccacaccttcacatccattagacgaaatatcacagggtgttgtaat  
aatttccctgtgaatctagaggctcgtagaacaatatcaagtatgccgtgatgggcataaaaca  
caccataggcgtctttcaatactattgaggaagaaagtctttccatttccattcttcttgatt  
cagatgggatataattgacaagttcttccatgccgtcgtttcctttaagatctagccgtatttct  
ttctcatcatgcattgtccagtccttaataattaatgacaacaggcaaaagccctgccaatctct  
ctaaagacgaagcagtttcttccatggttcagcttgatggttgtaatttgccttcgataaacct  
ctcatttttaacgagaataacatcctcctcctcctcgaggaaatttttgttctgtcagagatgaa  
aatcgtcgtgcttctcgtgctcttttttccactaatgcatttagagattttgtagatatttctt  
caatagtcactctctttattcgtctctataataaacacagacgggtgtatttttacccttatttt  
tgcattttctgtttcacttccataaacgcccctcgggtgaggtttgcaagggtagaatcataaac  
gcaaaagttcccgcattaacaagcggtagagaaatctcgtatcgccatcttggttggtgtgtt  
gttgctgtagcccttcagccaataggcaagctaaacggctattgtcttcggttggttcttaccag  
caggggcccgttctattgtttgctttgctgttggtgacataatttccctcctcgacgtttctcgtc  
agcctgtaattcgagtagagtttgtttccttatacgggtgtgaaccaatagtcggtaaaacacc  
aatccaccgggttacgatgatggatatcaacaatatatagaatagggccttgtcactagccttg  
cagcattgtctctttctgcagctgcagtcaaacttttgtagtctgggcctaattcgtctgtac  
gtggttccgtattctctcagacacgtccatggtgttggtgggtgataaagataaataactcaggtg  
tacataaaaacctctcacatgatggcaggaatcggtagaagagataatagaccgtaattacatc  
tggacattgatccaataaggaaataacctataacggttccaccaaccctattatctgtgaaaa  
aaacccttctgtgtttaacatgcagaagtgtcagactgtgctcctttccctccctaccccggc  
actgagaagcctttccctccataccctgggtactgcagtagaagaggaggagaagcaaaaggaaa  
ttgaggagcttctgggttgaccaatctttccctccccattccctggaaataagctgagagatat  
cccagaacctaccctctcgaatttcccgagaagaaggagaaggatttcccttgcgttgacact  
accggtcacagcgatatccccttcatcgtctggagaaaaccccaccccgtagtgcggttaggc  
acggttaccactacttaatacaacccaacaagggttggggagcttaaccatctcgttggtgaagct  
cactgaaaagcaagaaaacctgaacaaattgggtgttggtgatgacggttgattaatctg  
tcaagcactttgaaggaacttgagaagctgcgagctggcctgtgcaagttctcaaaaaactaga  
cggtaagggtatgaccaaacgggtataaccaactttttatataagcctaataattataaatcaac

aactaaciaaacgcgaaaactaacaataggaacctatggcctcatcatcatcatccccctgttgccc  
tctcctctgtcgcacatccgtgatgatggaaagagatgaagaaaatacactgtccctcaggaa  
caggaatgtgaaciaaaccaacacctgttagcgccgcctgggtgcctgttgatgaagaggatgaa  
gatagggaggaaatgagaagacttgaagatTTTTCTTCAGATGAAGAAGACGATGATAATAAAT  
CATGTCATTGTGACCATAGCGATGACGATGACGATGACGAGGAGGATCCTTCATGCTTTAAGGG  
TTTTTCAGCTGGCCTGTGCTCTTTGTGAGGGGTTCTTTGGCTTCCTCAGGAAGTCACCTACC  
AAGAAACAGGTGTTCTTCTTACAAGCGCAGCCGTTGCTGCTATTTTAAAGACTAGAGATGTGG  
CTAAAACCTGAAGAAGGCGCAGCAACCATGGAAGAAAATTCAACAGATGTGATTACTGGAGGAGA  
TGGAGATAGTGGTATTGCTGCTGATGTTGTCTCTCTCGCTAGTGAGGGAGAGGGAGAAAATGGA  
TCTCTTTTGGAACTATTGCAACAACACTCATCAAGACTACAATTGAAAATCTTGATAGATGGTG  
GAGAAGAAACCACAGAATTGTA AAAATGTTTTTGGTATACAAAATAAAGAATACATAATTTATA  
TAATATTTTATTGTTTCTTAAATGACAATTTCTTATGATACTTTTAGGTGAAGGAATAAA  
GGTAGGAGAAGGTGTGGAAGACACAATTGTAGTGTTTCCATACACATGATTCTCCCATGTTA  
TTATTGTTAGGTGGGAATTTCTTAAACGTAACCTGGGTATACGTGGAGCATTGTTGTTGTTGT  
TACTACTGCTCCTGGTTAGGGTGTTTTCTTGTTTTCATCTCTTCAATTCCTGGATACACTT  
CTGGATAGATGGAGATTGTTGAGGTACTTCTGGCACGTATTCGTAGACATGTTCTTCCACATTA  
TCATCCTCTCCCTCCTCATTCTTGATATTGAAGATGGGAGAAGGTGGGTTTTGAAGGAAGCTTCA  
GATGTCGTCGGTTTACATATGACACGTAATCACCGCCATTGCTTCTAGGTGGAGATGGCGGCGG  
TGTTGGCAGAGGAAGACTATTGTGAGAAGAAAATGACGACGAGCAGCTCGACATTGGCATATAG  
ACACTTCTCCTCTTTATTTGTACTTGTGGTTGTTGTTGAGGTGTATTGGCAACTGGCCTGG  
GTGTAGGCGGACTAGCATAGGTGGACCAGAAAATGTTACCAGTTTTGTGACTTGAGGGGTAAC  
ATTGGCCAGATCGTAAGTGGTAGATTTGAGCATGGGTTCCAGAGATGTCCAGGTCCCTATCTGGA  
GTGTTGAACCGGACGTGGCTGATGAAACTGGATTCGGTGTTGCTCCCGTTCCTGTTCTTCTTAT  
TCTTATTCTTCTCCACGGTGAGCAAGAAAATGCAAGTAGTAGTTCTGTGATGCACCTCACGAG  
CATGTTTCATGGCCAGTGCAGACCCCAATAGTCATGGAGCAGCCGACTGCCAATCCACTCAGGAAA  
GTGACGAGGATAATGTTGTGCTGGTTGGTGATAAGATTGTCCATCTCGAGAGATGTTTCTCCTCGA  
CTACCAGACGAGATATGATGCTCTGGGGCCCTGCTTCGTCCTTTTATACCGTCACTTGTTTGA  
AAAAACGATAGTGTAGTTCACAGTATTTGTCCCTTCTGGTCTTGGGATTGGGGTTCTGATACTC  
TGCCAGCCTCCAGATATAGGTGGATAGACCGAGATTCTTCCCTTGATGCAGTTTCTATTCCAT  
CCAAGATATCTTCAACAAATAAGTCCTTATGCAAGGACACCAGAATATTGAACTCGTGAACGCT  
TGACTTGTGATGATGCATAATTCACCTTGTTGACTGTTATACATACTCCTTCAATAGAATCG  
TATAGCCCGGGTATTGGCACGGTCTCTTCCAGGTAAGAAAACCTGCAATATTGTATTAGGCA  
CAACATCTGGCACGTTTACAGAATGACAGTAATGTTTATCTATAATGTCACCAGAAAAGTGAAA  
ATCTATCATCCGACACTGGAGAAAAGGTGAAGGAAAATCTTCCGCATATTCTTGAGTTCCTGC  
AATAACTTCTGTTTCTGGAGTTTGACTTTTTAGGATTATTTGTTGCCAGACTTACAGCATCGA  
AAATACTTCTCCATTCTTCCAGCGGATTTCCATCTTACTTTTGAGTGGTTTTTCAGTTCA  
TTAATTGTGTTTTAGGGAGGCTATAAAAACAAAACCTTACGCATCTGTTCACTCAGTAGTGGAC  
CAGACGTCGAGATGACGAGACATGGTGTGCTTGTTCAAAAGGCCGTTCTAGGCATGTTATCCT  
AGGAAATGTCGACTACACTTCTGTACTACTGACAATAATTGTGTGAGTCTAGACATCGATTC  
AAGGACAATATCACAGACAAAACATTCAGTTATTGAACAAGAAATTGGGTAAGAAAACAGCAA  
AGAAAATAAGAAGGAAGATGCACCTGAAACAAAGGAAAATAGTGACGAAGACATATACGCCAC  
CAAGGAATTCGAACAGACAATAAAAGGTCTACAGACAAAAAAGGTGCCACCGAGGAAAACGCC  
ATCGCGGCCGAGCTGCCGCTGCCACTGCTGCTGCGGTAGAAAAGGCTATGCTATCAGAAAAGTG  
AAGGAAAATCAATGGTTCATCAACAGAGCTAGAATGGTGCTTTCTAAGCGAGACAGTCCAGAA



acagttcactgcattgaagaacaggggaatctttcttcagtgttttgatatttgaaactggatca  
gtgatagttgtcgggcttcaagatccttcgcttacaaaattgtgtgtgattaaagccacgactg  
atattgctgatattctacagaaaaacatcagtggtgtaacgtgtctatagtgaatacagtgtc  
cacttttaatagattccacttgaactttattcgactcgggaaattcttcgaaagaaattgcatc  
tcttacagttataaccagaaacgttccccggtatgtttttcaagctgcgagtgcccgcaaagc  
ctctcttgccctggagagactataggggaatactacacaaagggtgcaatgatgcgcatagtaa  
ggatcccaattttaaaatgtctgactgggtgaggataaaaactgcattaacatttaaagttggg  
aaaattactgtgctcggagaaggagagagtggtgctggtgatgtttctgtcgtatccaaattac  
tatttggtttattccattactttatggacaacaacattaaaatgtccccaaagaagcacaag  
agtcagagaaaaatacggcatcccgcactagaatggacttgtacattgacatggtgctccac  
tcctaccgctacgtcaaaccatcggccgagcaagtgaaaaggcgatggtggaccaacaacata  
tttctgaagtggataggacatactatggaacaaagaacagtatggacgctgcatgtctgcaa  
tttagtgcttcaaaaagaagagagtatctccttcattaaaaaataagatcacaacaacttttt  
ggacattttgtgtaaacccttcaaaaagaactactcgacgtgctatagacacactttctttcgatc  
ctataaaccaagacaggtggtggaataaaaatgaccaatattacggtaagagagatgtgacc  
gttttctgttgacggttagtgctgtttctgaaaatacaaacagtatgatgaatagtcgcatt  
tctgtcaagggaaatggtggctagatgaaaacgaatacaaggataaacttgatcatattgtgg  
atgtgtgtacagaagaaatagtgagggaatgtgaatcaaaggggtttattgcctccccattttt  
gaggaagcaccagaaggaaaaataccaacgccttatgtttttattagcgagagcctgtaatcaa  
aaaaatggtaacaaaatgagtattaacaataatagtaactatttgtcgggttcaagtagggcga  
agaggaatgcaaaaactacaggaaaaacaccgtgtaactttagccagggtgaaacagatgatggc  
gtcgtaccgatttttgaataattacatctcaacagacattgcacctgattttgccaagttattt  
ggtaatgatgtatatagtttattacatttaatacaaaccttgctaaatcccgtggacatgctc  
taacatacaacgaaagggccctttcaagtaatgaaagtacatataaaaacacctggaaatgcata  
ctttagtactctattttgaaaaatccattataaataaccaagaaactgctaataaaggtaacaat  
agaaaacgtaaattttctcgaatcggacaagaaaagagctcttttctgtgcaacgcgtgtggg  
tcaatttgaacaagggtagtgatgaaatcataaagggatatttgtacaagttgcatcaaaatag  
taccagttacatagagaatgcattatctgacattaacagagacaagaagattaaacgttttaaa  
gcagctgcaaccatccgccagtgaaagcaagaattggtagattctttatcctcctctcatctc  
cttcttcttcttcttctcagacgtctaacaagaacaatagatgcaccctagtgattttataga  
ttatgtgtacaaattcactgacgaaacaacaggtgctcaaagggtgggcttagtgtttaaaatg  
tgtgatattcttgcaccttagcaagcaggagagggatggaagatcgtcccacagccaactata  
gaacctccttacattcagctactcaaaaataaaaccaatttgaataaaactattagtttctgctat  
caaggaaacaggagccactgaaactgaagcacagatattcaacaagattattggtagtgaaaag  
ggactatcaattctctgtcaacttgtggaaggaggaacaaagacaataatgtcttcgactgat  
ttgtctaagaatgccttccatgactgggtgggtatcaaagacagattgtgaggtggttgatgtac  
actgtgagacggacagagattgtggcgctgcttgcgagaacacgtactctgttgacggaagga  
ggttacaaaattctcttgtaaccaacagtcgggaagatgtgccaggagtgtttatagtgctct  
tctctagaaagagcagccaatgatcttggccacattataggtatcatcaagaaaaatccaaat  
tggaggaagaactccctgaatcatttttgtggtttatcaatcacaatggaggagatttgtttgt  
gaataagcgagccgctactacgacacgatgcacctaagcatagggaaactggataatgtggac  
actcttgcccagggtttagataaacggatggcctcatcattgagagagcacctactgaggaagt  
tggactctatacttttacaattgataaagttaaataatgaaaaggcaagaaatggatattgga  
tataacacagggaggtggcaccgaagaggacaataaagaagaagaagatgcgaaaaaagaggat

caatctcttagcgtttagtgaaattgtggatggttttaacgggacacacatgaccctatgccctga  
gggctagaggggtttatccagaaaaaatatcctttgtcaagaaacgaattgagagaattagc  
ccttaaggaactttccctgaagaaactacatctcctcagggttttgagtaggcaacatgatgta  
tctacgcgtgaagatztatgcaatgaaagtatgaatgcagggagggcagaatccatTTTTAGCG  
accctgattctggagagtacgtggctacttgtgcatgtctttactcggaatatttaacagggcc  
tgctgtaagcacaacatacaggtatgttatagactacgacaaatggaaaaggactggaaga  
cctgaatttctaactgatcctgtacttcatTTTTAAAAGGCAGAAGCTGTGTGTAATCGACAA  
atccaaacttgagggcaatttatagttccagataataaagggttcttGTGTGCGCCTGTAGCTGA  
acttGTAAAGACGGCATTAACTTTAGGGGTTCACACGAACCGTCTCTCATTGTGCGAGAGAGAT  
ataaatcaagctgaaaatctaccatccaattcatttGGTGTAAACTGGCCCTATGTGAATCTC  
taaatCGCATTCAAGACCAGTACACGTAATTTGATAAAAAAGATCGGGGAAAATGTCTGCATC  
TTAATATTGGACGAATACCTCAAGAAGACTGCTTCAGCCGTTCTGGATGTAGCTGACTCATT  
GAGAAAATCAAGGGAGAAAATCCAATCACCTGAGGAGGCTGCGGCTCTTCTGTGTCTCTATG  
GAGCACCTCCAAAACCTTCAGCTTCGGCTGTGGCCTCTATCATCACTGGAGAAAGAACATCTT  
AACGACAAAATATCTATCGGATAATGTCTATTGAAAATGTCTGTTGCTCGCGTTGGACAAGAA  
AATAATCGCAAGAGAGCCGACCAGGCAGCTGATGAAATTAGAACCATCATGGAAGATATTACAG  
GGAGTTTGTCCGGTGCGTACAGGCAATATAGCCCGCTCGAGGAAGAAAATAAGGTGCATATAGG  
CATCATGAATAACAAAACGCCTAGCATTGTTTGTGGATATTATACAATGGACACATCTATTTCT  
TCCGAACCTCTTCTCTAACAGATTTTCAAAACCCACTGTCTATTGCCAATGTGACTAAGCGGA  
TGGAGAGCATTTTTTCAAAGGTCGACTCTGCTAGGTCTACAAGATTCGACGCTTTTGTTAATGG  
TGTTGCGAATAATATGGATATAAAGTCATCAATAGATTGGGCAAATATGGTAGAAAATGTGATC  
AAATTACCAGATTCTACACCTAACCTTGTTTCAGTTGACACTATTGTGTCCAGAGACGCAAGTG  
TAGTTAAACAGCAGTTAATGATATATACGCTTCTGTTGGAAAATCTTATTGTCTGCTCCTGCAAC  
ACAGCTAACCTTTATGAGCGAGATTGAAAACCTGCGAAAAGGCTGCAGTTGTATGTTTTGAGGCA  
CTCATGTCCGATACTAGGGAGAGGGCATTTCGTAGAGTTCCTATTTTACGTTAGCTTTAAGGAAG  
ATGCATCAAATACCAATTCAAATGTTTGTTCAGAATAAGCTATCTTCCATGTCTGGAACCC  
CAGACAGCCATAAAATTGGTACGCCGTTCTGCTGAGGAAACACTATTCGGGCTCTGTTTCATG  
TTAAGGTAATGCTCCAGAATTCATGAACTGTATATTTAACTTCCCTACCATTCCCCATTCAA  
CACAAATACCATGGTCTATATGGTACATGTTTAAACCCCTCTACTTAGAAAATACGGTTCTTCATT  
CGAAAAGTCTGGGCTCATTTTGAGGAAAATTTAAGCGAAAGAGCCAATGCAGTGAAAAAATTT  
GGTGTAACGATACGAGGATAGATTGTCTAGATGCAGTAGCAATCTCACCGGACCTGTGTATG  
TTCTCATTTTAGACTTTGTACGTACTCTAAGTGCAGAGATCGTGTTCAACTAAATTTCTCCG  
TGAAATTAAGGAAAACCTATCTTTTGTGGAATAGGTTTGTGTCTATAATAAAAATGGCTCAGACAT  
CAAAGATGGGAACATAACAAGAGGTGTTTTGAGGAGGAAGTGGAGGAAGAAAGGCAACAACCTT  
CACAAAGAAATCTAAATCGGAACCCAGTTTTGAAGACAAGAGTTCATCCACATCTTCTAAG  
AAGAAGAGCAAATCCAATAAACACACCAAGACCAAGGAAGAACAACTTCTAGAATTCGTGAAGG  
ATCTGGAGCGGAGCGACCCCACTGTTCCCTGATGAGAAGGTCAAGCAAGAAGTTGAAGAAAAGTC  
CCCTGAAGCTATTGCTGAAATTTTTCAATGTTTGGGATCGCTCAAGACAGCAAGTTCAAGAGC  
CTTCTTCCATTGAACGCATAAAGAGCATCACTACTAAAATTGTTATCGATGCAATTAATCAGC  
CTGTGCGCAAGATGTTGGTTGACCACCTCTATCATTTTAAAGGAGATGCAGAATGTTGTGGAGAA  
ATATAAGGACGATAGCGACGAAAACCTGAGCGTCATTCTTAAGAGTAAGAAATCCCCAAAGAA  
TTTGACCTCTCCTTTCCGATTACGTTGATCGCCTTAACAGGATTCTGGTTGGTGTAATTAAGA  
GGGTGGCCGGAGCTATTGAAAGTAAGGAATTGTTGCAGAGTAACAGCATGATCATGAACAGTGT  
TCTGGGTACTGTTGTGTCCAACATTCCTTACAACATGAAGATTAATATTTGTGTGTTTTGACT

aactttatTTgtacattTgctaTgatgattTgtacacattctTTtagggatgatgagaaattTg  
taTgagTcaggtacaagatacattTcaaaggattagaaaaataaaagatggTataaaattac  
TtgTatTTTtattcaaacaaaacTTTtatattTgtacaattcccactTTactTctTtgattT  
cgTcctTgatatcgatcacattctTggaggTgaatccaatgTtcattgtagctTcgaaggctgc  
gccgTctTcaaattTgctgcacacgTcaatgagggtaaTTTtTgaagatgaagattTaatgTcc  
TtgctcgagaagTaatgTtcgacatagTatTTccctTaatgTttcctgcaataacagTtgGCC  
gaacagTaatgTcgtTgatcaagagatcgacgccagTgTtGttgaggatctTcaaagTcatgTt  
agagTtctcgGCCcagTgccagcgggatcagTcctTggggctgTgacggtagagatgacaaga  
TcagcagaaacatcctTcatgTcctTatcgagagaccattctTcatggccacTTTccaagag  
gagTattgtaggacTctctccacgaattgacattacTTTgcccTTctTtgaattgggactcg  
catcatctgatcataattagcgcgacgctTctTccaacacgTgTgTgaatacaatcattata  
acatgataacgattagagcaatgattgcaatggacaagattgcaataattgcaacgTccaggt  
TtgTtaggtTgccaaattccattTTTctTtGtttagatggaaagTtctTcctTtacgTgTtGgt  
TggatccagctagTtagTtctTctgtagcaccatataccagaaagggtTtGttTtaaattT  
aacctacatcgaaccggatgaagTgtacctTgccgTgatctaattTcagTaacgatacctccc  
actaccctactTTcatctccatctctacccctcctactcctcctTcacctcctcctcctcc  
ccTTTactcgtattggTcgtctTcatcgtcgtctTctgaattggatgaagaattgTaatattT  
TgtgTgctTcattctTTTcactTgctTtGctagagaattgacgctagattTgTtattcaaaagg  
TccataaaagTcctcgtctagaaggTgTggaagattctTggTcaatatacacactgctagcgc  
TactcatgTtGgaattgatgTcattTgaaaaagaaaacgTtctTTTcctaccaacatgagaaga  
TacactgctaggcagTccattgctgTtGctgctgctggggTggaggagaaacatctTgattT  
TtagaaggacggTacattaagTtTcgcataggcacaacagatgtagatTTTccgTgctTaccct  
TttTattgTatTTTctcagatgctTgattTtagctTatattTTatgcagTacactTcaatggacaa  
TttagctTTctTtaaagTtTgatcactactgcgctTtagcaagTgTtTcctcctgTccatgaaa  
TtgactagTgTatTTaatgcattatcaaaaataggggatctgTgTtCgatgattgatgagcctg  
cattgTatgctacaccaaaccTTccccgcctTgtgTctggagatcaaacatactattctTgct  
gTtattgTtactcactccagaatacgcgTcaccgaaaaagTggTtTaatgatgtacggTcatta  
ctgTccccgTatctTatattatcgtatactcgacgaattgctTcctTctTgTcctTctctgaaa  
acatgTtGCCgTctTcactTctTTTctctgcctcactTccattaccatctTcatcctctTcatc  
gactgcctTatcaaattgTatactgTtTaaagcgtaaatgggaggggacagccattTtagaagaa  
caactagaaatactatccaaaagaagaactTtataatctTTTgacaaagTgaactctTTTggcc  
aattTaatagTacaattggTatgTtcaagaaaattgTtaacctTcccagTccatacatagTtT  
gTtgatgTgTtTctctatgattgTtagaaattgccccgaaacaaattTctgcccTatagaacct  
aacccattTctTccattatgTtTgcagattctTtactcatctgTtTtagTttagatgaggtag  
acaaatctgatacatcattTgTtTcagTtTgatgTtTtTcaaattcctTtTgggctTtTgTtGgt  
gtctccgaacagTgccactgatgcctTggTcactatgTccgaaagcatattgactaatctagac  
caagaaacagcactTgatgTtTtaaaggatagaggTtGtTtaggaacgccagTctTtgaccaa  
gctTatacgtTtgacatggTtgattatcgtcgtctTctTtTcagtataTTtatcagTtccatgTg  
caaattTgctTgagTtTgattactataaaatgaagaatgctccaccacctctcctcctcctcct  
cctcctcctcctcctcctccagcaatagactcgtcgcctTcagcacatactccaccagcagatg  
aagacatggaagTtTcatcctcgtTtTaatcagatatactTtTcaacctTtTtaaagagaaggagc  
aggagTcgatggTctTatTTTgctagctctTtTccccattatataagTtgacgcgTatgctgct  
gaaaaagagggtTggacatgattTgctTcctctgaaacaactccaattTctcattTgTtTtcc  
TgaacagctcggcagattTaatgTctgTcaccgcagcagaatctaaaaatgcctTcatggtTaa

ttctgcagcgatgatatttttaaggcgctccattactttctcggatggttttactgggttttct  
ggatccttggaaacacaactttcaccagttcagagcattgaaggttccttggtgtttctagaagag  
tttttacccttgtttttaagattatagactccatagtccttggtgtaatctttcttcggcctctt  
cccacctaagtgtggtgtaaacctttccaaccactgtactcaaaaaggatggattggtggtggtg  
tttgaaaataaggactgatttgtaggtggaggtggagggggaggaagaagaatattggtagggt  
tgagttgaggaggtgatgaggtggtggtggaggtggagggaggaggaggatcagcatcga  
atccttggccatgatgtctctactttcttctcccatttcattgtctggaggaaaagtcacgata  
gatggaacaggcggtggtgctatatcgtttagttgggtcatattgttcctcacctccactaccaa  
gaatagaaaacattctaggtgcttttggtgaaggttcctttatctgggggagaatatctgtctc  
tttcatgattggaggggaacacaactgcatcctcgcactcttgatatactggagggggagatcct  
cgaaccctgggcgcatgttaaattgatgcatagtagtacttatttcttcatcctcagagtgtggtcc  
gagattcatcttcatattcttcatattcttctcctcttcttcaataatccggtgtgagattgaac  
agactctttagtttctacatgctcttcagatttttggtgcagggtcctcctcctcctcctcctc  
ccctcttcttcatcctccttcttcatcctccttcttattatcattgccgccacctgctattgaagaga  
agaaataatccattccatcatcattacctccttactcatagggctggattcaactctatgaga  
gtgcacgctttcattttctattgcatcttcatccttctcgggttcattttttcttgttctata  
ggttctttttcttctcctcctcctcctgttcttcttctcctcctcctcctcctcctgttctt  
cctcttcttcatcctcctcctcctctacgggttctatgttggttatcatcttctttggtttt  
ctgttcttccactgctgatccgccatggcggttcacattttcaagtaaaaagttcaacatggga  
agaacttgcctatttggccctactggcgaggggggtgttactatacttttccactggttttcag  
gtataattgtcgcaccttcttggtgtgcccgtagcgcgaataacgcaggggtcagcctcatctt  
ttccccttccacttattgtcatcttcatattcatctccttcttcttctcctcgtcttctagattt  
ccgtcatattcacccttcttctcctccttcatcttctcctcctcctcctcctcctcctcctt  
catcatcatcatcgtacatgctcattagtgacatctctcacaatttactttgttttttagaaga  
tggaggatctttatttcttccatttctaactcccgtgtcctcatcttcatcttctcgtaatcctcc  
tcctcctcctcctcctcctcctcctcctcctcctcctcctcctcctcctcctcctcctcctc  
tataatcaacattattattgatatcgtcctcgttggtcgcataatccaacactcccgcaccttcagt  
tatacgcagatttgatgccgcttccatgatgaaattttagatatacaatattgtggttaaccgtgg  
aaaatcaaacactacatttactaagttcctttcctgaaaaaacgagttacctctatagggtaat  
tctcaggggtgatattctatagtttggcttgaacgtgcttttggtttttggtataactttctc  
taaaatctactaacggcaagagcattgacagttgagtggaagggggtggttcagagtaagacca  
aaaataaaaatattttttgattgtgtgaatttcgaaccgtttatattactatttttagggtag  
aaaacgttgtcagaaccaatcatgaggtttatcccgatgttgataattgcgcttatcgtgcat  
ttgttattgcagctcttcttactgccaattcaaattacctggatcacaatatcaataaggaact  
aaatttgacccttcccttcaacttcgggggaacattcacaccagaagatatagctcataacaac  
agaattctcccttccaagctgagtggttttagaaagagggtcaatcatttttagcagaaatggaca  
agtacaaaaatgcacaacctacagtaaaataattctcaagagaggaggaacatttctactcctca  
acaacaacaacagaccacccctcatcccaatcatcttccaagttgaactttaaattctataa  
gaaaatgctgatttatgttccctgtatgtgacgagtcctcgcaccgacgagaaagaagattttaac  
aacgatgaggaagaaaatatattaaaggaggaagaagttagtgaggagaaaagggttgaaata  
tcgtagtagggagtattaagatgatgaaacctggttcaaaaatcaaaacaaagtacaggctcta  
ctccctccttgcagtgcatagggagtagaaagaaagctgaagaatatattgaacgtctatac  
aattccttttcttccatgacgttgaatgaaggaggacgtctggcttcagcgatttattgtccat  
cctacaacaataaaaaggataaaaaacaatcgttctagggcctgtgaagctgatccatgcctccag

ggaattggtatctgaaactacggtgagggaggaaatactacggaaatctcccgttcttcttct  
tcttcttcaacgtcatcatccacttcttcgtttcttcaattttttgtttgtaccttctaatt  
gtacttctaaaactgtatgcgattttgtaaaacacatacagtatgaagaagatattaaccggtt  
aaggataacataatacatatctgaagaaaactatgcttcaagattttctaaaattaataga  
ttaactacatgtatacaaggtataagtaagacaataaagattctataaaaatcaacatttatt  
gtatcatttataaaaattccatatttttgatccatttcgtagtcgacgggtagagatggtctgt  
agaaagaagatgctgctccttttaaaggttattggacatggctatcacatacattttcttatt  
gtttccctattgatgatatttgatcatgacggtgggagtggtcattttgttgctgggtgatga  
caacggcaacattactggtggttcttaaccacctgagcaaacatggctgtaggggattatctt  
ctatgtcctctgtaggggaagcaacgctcgtgggttttatgattttaaattttataaaactttgt  
cacaatattatctttaataatataatgcccgtgacagacgtttatagaagatgcaagcggccgtct  
accaatggatattctgggtgtacaaccaatgtggtttcttcgactttacaagaagctaactctg  
ttaccactgaaaaagataaaacctgttcaatttgtagagggttagtccccagaaaaatgatgga  
aaaatatagatcggacttgtctcctaagaacgtgggggaatatattttaccttcagaaaaagaa  
acagacaaattgaaaagtgattataaaaagggtaagaagggttggcttttaactgccctgagta  
atggctcatgacagtaacaagaggattatagggccaagggatctgattagtagagatgatgtgaa  
ggacaaaagttatgtctttaagagattgagcaaacatccgctcgtctactactcttctgcaacc  
tctaaatacgttagaaaattttccccttcagagcaaaaaaattcatgacatcaacacagttgg  
ggagtaagctcgtgtatcctcaccctatacggatggactgcttttgaactaccacgggata  
cgtgatcaacaaagcatacggaatggataatgaggatctacacacttgaaccaccctcttct  
tctgtgctcgtcccagactctaataatgatagattaacagtagaatgtgctaaaacggacccaa  
cacatagaatcggcatctacggctttggagggtctgatgataatagacgtgcaaaaagaagaagg  
ttatgtagaaatgttggtatgtaattgtgacaaccacaaggacttgcttaaggctcctctaatt  
acagagtattctacaaatccaactgaaattcaagtagatggtgctgcaaaaacgtgttttattcc  
ctgcccctgggtccgagcctgtaaaatcttccaagtacatctgctgctcatcaactagacgg  
agctactggcgagcacgatatttcccatgagcccgtgaagctatcagatacgggtgactatgca  
ggtggatcaccattgtattcaagccagtttatggtagatcttttagtaaatcttccagaaacag  
gatctcctctggcattgaactgccctgcaccgacaaggctgatggaatataatcaagtcaatca  
aaagggagggatattatatagagatatggtggggtatcttaacgccaaccctgtggaagctgca  
tcactttcttctcggactcttcttcgtgggttgacaactggtaacaaaatcttctgttacat  
gtgaaggagaaaaataaagaaaattgtgtaatcatatgtgtagttttattaccactaaattta  
ttggctcttcttggtactgtttacttagggaattttactcttctcctccatctcaaaaacttttca  
aaaattttctgggtcgtcagagtttagaggggtggaccgctgggtcggctgatgtcaagtttg  
gaggggtggaccgctgggtcagccaatgtcagattgcaccagaaatgacagagctccagaaacg  
tacattaactttatactgtttctggaacatgtatttctggagactgacacgtccagaaagggta  
gggcatagtctactgttttacttagggaattttactctgcctccaccttaaaaacttttcaaaa  
attttctgggtcgtcagagtttagaggggtggaccgctgggtcggctcaatgtcaagttcggag  
ggtggaccgctgggtcagccaatgtcagattacaccagaaacaacagagctccagaaacgtac  
attaactctaaactgtttctggaacatgtatttctggacacggacgcaccagaaaggggaaggc  
tataacacactaaatacactagagaattttactcttctcctccatctcaaaaacttttcaaaaatt  
tttctgggtcgtcagagtttagaggggtggaccgctgggtcggctgatgtcaagttcggaggggt  
ggacctctgggtcgaaccgatgtcagattacaccagaaatagcagagctacagaaacgtacatt  
aacttttacgtgtttctggaatagacgtttctggctcatggacgcaccagaaaggggaagggtgt  
aacctactgttttcgctagagaattttactcttctcctccatctcaaaaacttttcaaaaattttt

ctgggtcgctcgagtttagggggtggaccgctcactcgggtctaagtcaagttcggagggtgga  
ccgctgggtcgagccaatgtcagattacaccagaaacgtttggtgctccagaaacgataacaca  
catttctggagcagtagttagttatcttctggagcacgtaaaataagtagggagaataacat  
aacattatattttcaattccattttattgggttctatccatctaaaggtgtagaggaaatactt  
tcattgtagtataagaatccttactgaaatcttcaaatcatccaaagagaataacaatctttcc  
agtataacttagaggggttccttggtgtagctgttttcgtgtccctggcgagacggtaactatta  
ttgcttcccatctttaaatcttcgcttctactcctcttcatagacctgaataaggctatggatg  
aaataggggtctttcctacaggttcgacaataagtcttccatagatgcggtccgatatcaagtc  
ttgcttggccttcttcacattcctgtcggatgcggcttactcccactagttttccatatctct  
gattccgtttgcatctctctaaatgctttccagatcaatcttctctgttaacattttccactt  
tgacataattattcttcaacatggttatccactaacatcttggatgaaaatgcagataagagagg  
taagggcctccctggtaaaaaactagtggttgacgcacatcaatcacatttcttcgtgcttaaca  
gcattccttaagcccaaaagcttgcaaggataataatgatgatgtatcttcatctgttgga  
catttcccataagttatgtgtaggaaacttcaaatctccccatcttgccaatagtaaatatac  
tgctctgtcgaattgttcggttattgaaggattggaggtggctgcagccgcgtacaacaggtag  
aaagaaagggcagcaaaccttttagatacatggacataatcttgcagcttcaaacacataccctt  
tcttatccactaggtgcatgttacgcacttcttcgtcctctctttttgtttcatttttcctt  
aaaacctatataccacctaaccctccccctcttaatatagaccgaatctgcagagagtatctca  
accatcaactcccctaaccattgacattttctgctcctttattattaccaccaccaccacta  
aagcatcgagtactgctttccagtagctctctagttcctgttctcccatagacggtttactttg  
ttcctttaaactgatggtaaaagtgtctagagattttgttatgaaaccagattcacaacgctgg  
cagacgaataaagaatgcatatctttcaaaaacacttgaagaattaacctgcttttactgacg  
agctattagttttctgtgtagccctccagagcataaaaataatgcattccatagcacatacat  
tgaaaatcgggcagctgagtcgggatcaagaacgcgggtaacagagtagttggagaacataact  
tgtctattattgacaagaaaataactccaaagtttctgggtgaaacaatatcgttaaactgttac  
atctcttgattcacgttgaagagcttgaagggcggtaggtgtgcggttagggcctaaaattcc  
gtctatcgcctttggaagatatgggtgggtccctaaagagattctcagcagtcatatccgtagtt  
ttaattcgttctctttccctctcgaaccattctttttccctttctgtgacacttccggatggca  
tctgcagatggggattgttcacataattatccagtttagttgtcaaaggatttggtttagcgtt  
tctgggtcctggacagcactgccctgtagctctgcgtcgatggctgctgataatagtacatgatt  
tccctccctaaaagagcttcatggaaagaacctaccttgggggggtagaatccttccctgtatta  
cagaaacctggttggttaaaacagtcgatatagttggaaacaacataagattgtccatcttctt  
actgactgtaactccatcactaaaggacccttcaataaagtcttttatccttttttcaatcatg  
tcagcagcgcgtccgtactctaggtgaggaggcatggcagcaagggatctaaaccctctctt  
tcattctagagggcatagattgcttccatcttagaatatcacaagagtatatcctagaaatag  
agcaatggctctttttgctcgtcccattgccagatcggccaccgttgaattgtttctgttggcc  
aacatttctgaaatcaattaccatgaaggttcattagtatcacctctagtggataaagaacta  
gattagctgctgatctaaacacaccgtccataatattctcaaaggcattcaaaaggttcaataa  
tgggtgcttgtttcaaaaaagtaaaagtcacatagttcttccgctgcagtttcgggtcaatctcaa  
gaggggtcaattatagctcttaaacacttctatatctctgttagacactcctcatgacggcat  
ctttagataggtgtcctttggctaatcttagtcccgaattaaaaaattctgtcgtttttattgaa  
ccacgtgggtccgaatacgtcagaagaaataacaaccttcccttgtttttcaggtgtatttgt  
aaatttgaaatggcagcaactagccctccgatacataatttagtcgtttttcatcgggttttag  
tttctgctactaatgccagaacatagtcctttgactctgtcatgatttttgtgggtgctggtaaa

gtagtttttgtagacgctgcaatatcttcgaccttaaatgtcttcggttaaagggatattttatt  
tggtgggtactggttttcgtcaaggctgaaaaataatttcaaataacaatggagtagatggaaga  
aggagacatcgctgaaaggcgtcagaagggtgctgactatattctggacgaaaactctgcttgt  
gtagttaatgtgaagagatccgtaacaggctcggtgccatggacgcccaggaggacacagtacg  
cacaggacatttccgccaacttgtcacccatattatccgtctggccactgctccgaatccaa  
caagattaaggataccattgccagatttgccgggtcttttcatcaacaacatctttgacaacaat  
tcaacaaagaacaaacttaaaacgtataatcaattcaaggcagagtcacaaaacaagtctagcg  
ttctcaatatctttgggtctcttagatcctctgagtatgctttctagcttcatgggttctgatcc  
agcaaagagtggaggggaaaatttggacaaatctttgggtgtgctctttgaggtgcttcaaat  
tacaacccttgcaagattgacgatattgtccttctggaaatgtgcccacccaagtgcgcccgcct  
gcaccggtctcaaggaagccatccgccaggaacaacccatggaagcaatggtgttgtttttcaa  
atgtatcaaccataatagggttcaattttggaagcgacataaagtcagcatacgcctctgaaaca  
tgcatgagatactctcaggacgaacgcgcagtcggtgtgcctctgaggagtatcctcctcgggt  
gcctcgacagggatgatccagctcactctttcctctttcggggatactatcgagtatgctga  
ttcagataacgcttgggtttcttccctgtttgcagccgtctctagaatgcctatggtagacaga  
gccgttattgctcacttttacgtgtacacaatgctcagccgacataggcgagtatctggagaca  
gcttcaagcagtttgtctataccgtatttgttcgtatgatttactctgcgattgaaatttgtt  
ctgtgatactgaaaattcgtctgtagaatgtgatggaaagcactttttgagctatgttaatgcc  
atggttaacgtatccgtgctgggttctacgtttaacgtactaaaagcctaccgttcatgggtgg  
tgatcaagcatccgtcgcaccggttctagacattatttccggaggatggaagaagaactacc  
ctcacctgaccacatcaagaggggtggcgtacgacatctctcaagtcacatcatcttgcac  
ccttctagaatggttaaaggtaacaacaaggctagcaacggttacatctggcctggatagtatca  
ggtctgttcgtcaagcagaaaaatataatcccgtttggaaacttgaaaataaagcagggatg  
tgtaataaacattgccaagcacaacatcagccgtccagcaagagaacaatccaacggaaggaa  
ttaattgcaacgctttacacattctaccttcaattaagggtgtgaggcacttggggcacaaa  
aggggagcgcagatcaaactgtcaatgtttttgataatttgtcgcacatctcatatggatattgc  
catgaaaaagcaggggtcggggaagattcttggactgctcactagcatgattgacaggcaagg  
ctgactacttcatccttagtagtgaagcgggaatacaagaagagaatccatgatttcacaagat  
acgtcatcttcttcaacacccatcaacgacgaactagtcaattctcgtgtattcttcccca  
ttctaattgttctgaactcccctatcagcttgagaaatattgaccagaatcagtcaccgacact  
cgattccactttctgctcatgatgtggcagcggccaaatatacgatgaacctaattcttctgctc  
taactacaagtcagctagaattgttgccttagcaagaacaaaaatgggacaaactcaccaccag  
agcgttcttcaatatcgacaggatcaatttccagatggcagacgctatcattaagaacgtttct  
ggaagcggcttccctagatgggagtaaaactgcctcttcttcttctcagcgcctaacttttcc  
aatcttcagtggtgctgaatgcactgcaaagcagctccaaagtattcgcaaattcattggaga  
atctatgcagcatgtacaaaaggaatggagtagtgagtaacaatgggaacagaggagtagaa  
aattatgacggactcaatgctcagttctctgaagaactgttcgagctgctctacaaattgatca  
tcgaggaggatagcggccatccagcctgatcgcctcatctgaattcttgagcaactacgtcaa  
cgccatggatgaacttcttatcagagctaatgcttcttagatagggtttttatgaaataaaaca  
aatataaattatataatcatgcaattttatttatacctttttttgtatgtgatacaatattttta  
gtgttatgacagtgcaaccattatattattatctgtaataggcttggtaaatttttaataa  
ggaagattaggtgcacaatctattgtcataaaaatgtccagggtcaatttcttcaacaccttct  
caaagttatagaagaaacttgtttcatcatttttattagcaataaacaagtagcttttttctt  
agctgtgcttgcagagcttatccaatagctctgatgcctttttaacattataaacagttggggagt

aaactacaaaaacagtcctctgttttgtttgtagcgtatacccggtacacggttaccttctacta  
caaatgaaaactctatccgggctttttcaatacgtcctcccacagctgctctaccttgtttttg  
tagcacgggttctaataccaacttgtagagaatccagattcgttgctgcactaataacattaaat  
gtcctctgtttcatggtgacatgtacagacattcgtccttgccaagtgcgcatatcacgatcac  
tgataaaacctcctcgtatattatcaccatcctttgagtagcgggcaaggtaatcagg  
tgtaggtgaggagggttgttgttctagctagttgtgaagaagggtgttgttcaacatcacc  
atctctgctctgggtctgttgatctctgtaggctttcatccccattttcatcagaaggatcaa  
ctgttactgtaccaacaataaaatattgggtcaagtctattacgagttgttcgtaagtgatatt  
ggtagatttttggtgcaacaacttcatccatcgtttccttgacttcgtcatgggtcgtccctatg  
agatcgaacaagttttcatcagcaattgcctgtccgacatcggggacgtttatgtcaccttcag  
ggattgaaacttttccatctgttattttatcctttattaaccatacgttttctgatttgtatgt  
gtcaaattcctgatctgctaatttgggtgaagaattcatcctcagctttttcaagagttcttgca  
aatgctctctcgtttgacggtgaagcgtgtctcattgataacatcaactgttcctccccctc  
ctcctccattattattatcgtcgtcagttttttcatcatcgtcagtgatttagagtctaa  
ttatatttcttactctttttgttttggcatttgaatgtagagttcccttccctacgcccag  
atagcaaagaagagggcaatagaagctcctattacaaaacaataaccgcaaaaacaatgtata  
ttcctccattgtttgaaagtgccatttttaaaccttcaattcttatcaaaaaacaacagat  
tgaaatctatgtataaatcatcactcgcgttttcgatttcaggcatgtgaattgtaatgagaga  
ggccgaatcctcggatgggttgattatgccatttgtatcatgactaatatataataggatcattt  
ctctttagataatcacctatgttatcagaagaatcactatttcttagatttgataatcacta  
cactttttgggtctgtttacaataaccagcgaacgtggatttgcggttaaattctaacgtgagagt  
tttggctgaagaatctattttgaacgataaaacttaaatcaattaaatccccttgagcagctcca  
gggggagtgattgataacatgtgtttatcgtttattgggtacactaaatgaagttgaagagtcgg  
taaaggcaatagattgtacttgaaagaaaatgatgtatgataaaaaccagggtatataatcttct  
ccaccgctcctcttttaaaatttcagttatgaaatcctccctgggttccatgatccgtctattc  
acatcgtataactttttccataaccactgggtattcctttctcaaaaattgcttcacagataacag  
gattgaaagcgtcttcgtaaagatgttcaaaagtcattacattagttaaatggctattgatttc  
ttgccttacttgatcctctatataatccttagaggcattttttgctaccgaataggcaattgca  
cctaagcgataactttaattgggtcactctttcttgtgatccaagaattgtcatgggtgagcagctc  
ccaattgagcctccactgaagcgatttcagcttcagtcacagcaggctcatctcgttagacga  
cattatctactcctccttaaaagcagtgattgcaacaatataatcgtcccttgatcgcctctt  
ttatacgtttaacagcgtatggtgcagattctcctgttttagtatatgggtgtgtttatctag  
atctacatacaatatcaatatctttactcttcccttcaacaatcacattaagaatatgactac  
gcttctcctgttcgattaaatgcttcaaagcttagcacgctattaactacgtcactacgagac  
acaagaatcactgcatctacatcctcatcatttatggaacgaaacaattttgccgttatttttaa  
aatctccaagggaatggagaaatcgtaccttgtaaattctccatcgtcaccaccaattctcaa  
attgtacgtagcaacactacaccgcccacttgaccagtttcttgttgaattttttcgtctata  
tctgtgcaagatattgggggcccgataccaatgtacaagattttgcttagttttcgttttagcca  
agtaatcagttattttgtctaactctattccttgtttttcaattgcctttaaaacacaatc  
cttttttatgtcttcttaggcgagatctcacatccagttctgcatccttcatgtaaactctgtct  
ccatgtcttacagtggttcttcaacaattcgtttatgtgtttgggttatgggggtgatcaacaat  
cagatagattagaaacaccacgtctttctacaattttatcaaggatgaggatcaacctctcatc  
gcttatagttgcccattagacatgctgttgcacttgctttttgggtatacaacatcaacaggtg  
taaaaaacatacaaaaagaataaaaaataactttagggggaagaaaatgtttagaagattttc



aaccttttattgttctggttctggggogaagattatatacattcaatcttttaacgtagacctttcttcg  
tcttcttcttactcctacttctttttctcctcctttctggtcctggaactggaactggggctcg  
gtaactggagaagttgtggtggtgtagtgacagatattacctcctctatTTTTGGTatcctga  
gtacaatttttggTTTTGGTTTTaattgtactgtagagggagTTTTctgtgttacccttatagc  
ctgtttcaggaacaagggtaggtgtctatacccaagggtagccattgctcaagtgatgctccac  
cccgTgcttttcccccttatatacaatttctcacgtggtcaataaaggaacacaaaaaatatt  
catcaattcttttatttgatcaaagaacatgTTTTacacagtttggggcacagataatcaggggt  
aagtctcaaacccttggttcattacaatgtacttgacaatatcagaatgggtcagatTTTTga  
gaagcattaggaagagctaaattggtagagtgtctaagagcatgcaacgggttattcacaacca  
ttgccagaaacatgggaacagatagtgaagaaacttgattctcatccgcaatatcctctgtatt  
tgccctctgtgggatgaagaggacaaaaacacagggatTTTcagattactaacatcaattgg  
tacaccatacaggctaacattacagcaacataatcaacaccagttttatcactcttttagtgttt  
ttaatgaggaaagtctcctcttacattcagtatactggagagccatttcaaacaacatgtgtaa  
atgggtggcaagaatacatcaaattccctaacatccattgaaccccaggcatcacacaaatgTTTT  
gttagtgaagaaccaactcctattaattccccctccttatcatatcctacaacatccatatcag  
gatttggtaaactcataccaatacaattgtcaaaattgatggctggcctattctttgtggcagg  
agagtgcattcttgatgttaaaatctctcccaaagaatcttgtggtcttaacaaagggcatttct  
acaataaaaactgaattgagcatgctatttagttgagcccattgctgcttagaacgagcaa  
tattcatagccattgtattcaaagatttaggattaatctggcacatttgaagaggtgatggtaa  
tttattgcacatggactcgtaatttgtggtttcttacggcgcaattgttgttccctcagcatca  
caactattgtcttcttctacttccagtgatagtagcagaagaagaagattctccgtaatttg  
ttgcagccttagcacaaagactcattgaagtgtacaaatggaaaaaggtgttagtattctcctc  
taaacgggaaactgattttacgtctctcaattctaggacctggtttctgatcaagtttttcatt  
aaaactgatggaagaacggatgatacgtcactaattctatccttctttttgttgtcactggaat  
gcccactaaagtattccatgctttcttgtgatgattaaattcgtggtgacgctgttttattcc  
atgctttccaaatttgatacatctttccatcattaaagatgaatggatatacttcattcctcta  
tccaaaagcccgataattttcttaacatcctcattcttattctcaaagacaaatgttgtatcac  
aaggaaaaacaataagtcttttagacatagcttcgtcgacaaagaatgagaagatgtaactgtt  
ggacatcataataggagacacagtaatgctgctttttgcgccctggttgaaaaatgcctctaatac  
atgacgctgttttgggtgaagtcataattctttaataaactggagggaaattggcccgggaagca  
tatgtttggttatagaactggacacatcattcttttgggggatggccttagcgaatttcggtaat  
aatggaagaagatccgtcactgttatgtttttggagtgacagaccaattgccttcttttaggc  
gtatcgacattgaaacaagcctctttattactgtctcctccaccactagagttagaagcaaagg  
aaaattgtgaactttgttgcctattttctccaaaacacttaaaaagtttgcaatatcactgct  
gttatcgtctgttttaggtaaagaagacgtattttttgatgaattagaggaagagtcgtcctt  
tcgtcagaaagcaaatttttatccatacacatgCGAataaaggatccagaattcttagccgaca  
tcttatccttctcaatacgttcttttaagcaagaaggacattttcgcagtcagaagtgggaagt  
tgacagaaccactgaaccatcagaagtaaatccaggaaaactataattttgacggtttcttaacc  
acatcgaataaagatgCGtcataacgttcgtacatgttcataaagtccagatctctatccacta  
atagttttgacagcttctgggtcctttattatggacgataacttgCGagaaatagtcttgatgtt  
acgaatactgtcaatattaatattcgacagagtagggccagaagagccttctcggcagcatca  
tcgacagctacaaagtgttgtttcttgggagggggaagtaaaactgggtagtttgtttttgaaa  
gatcatcagaaattttccagtgtaaacgcaatggtacgcaatcaatacaccagggggcgatgt  
attacatcaataactgactttttaacgccccgtttagtcgacaggcaatttatccccaggtat

ttttaaatttcgagcatgtcctgggcagacaaagatgacgtgatcatctcggaaaacctttcag  
tggcaggggttcagactaaaacaggcgaaccgctcgcgatcaaagatgattccatttcaaag  
gccattgttttctgtattatgttcataatcgcatcaactttgtcttcaattttcatattctgc  
ttattttcttgttcttgctcataaatttctcattccattcatctatatcttctttacaatcgt  
tccaggaatgaagattattaacctggcagttttcatcaataatggattcaaagattcgttatc  
gcatattttggatccaaatttacctaataatgcacttcaaggcagtttttacttcggatttagag  
aatttgccttcatattcgataggtttcttacagtgcctgtacacagcatcggtttcgtaagcc  
aaggagaatctgtgcagtccttaataagagaaaggcatggcgcctctatggagcatattatacac  
aatatttttctctttaaaggtagttgaaacaacaccagaagaacaattccaccagtgagctttt  
ctggcaaagaaagaatattgataggatcctttatgcggaacaccattttcgtcatttttacggt  
cgtttctctcaatttctcacattctacccttcatcttcaatttcgccacctcttttacggtt  
ttttgtatcattacaagcatttttctattcttttctgtgtttgagttcagaaataaaatcgtac  
tcttgggtcgcatacttttagttttgattcgggtcattaaacggtaataataactaaaaacgatct  
tagagtttctcctcgtcaccgtacgcgtttcttgcttcatgtatgtcaacactattcatttctcc  
cccactgccgcaaaatcgacattaccacttctggaagcagactcgtccttatcgtcttcgctc  
gatgacttctttgagccaaatgaaccttgggtggcaacttcgtcaataatcacgatacccttt  
tgccagcaaaggaagccaaatttgcttgagtagatgaagaagaatcccagcattattgagagc  
cgtaacgttaataatttgtaaacccttccgaaccaagtcctcttacacaaatcgacaagagtggtc  
tttaaattgtttccctttgttcccacaaatacaacagcagtttttgtggcaatattcaaggcaa  
cggaacaaagagtttgaaccatgtgggtgggctttctctccatctcctgaagcaatggctgtgca  
catacctccaaagttcattaggccacgtaaaagatacacgacatccattctgggcatgccagtt  
ttttgggtcaacacatgagatgtaacattttcttagcgcgatgaagggtgtagttgtagaattaa  
catcatccttttgcttctcttcttattactactactactactactatgttttgaagaaga  
agaggaggaggaggaggaggaggagaagaagccgtttcacaatcgctagtggcttttagca  
agttcgtataaaattgataaaaatataatcttcatcagcaataaaaattgatggagggttta  
gagaagaactgaatgctgtttttgatacaggttcgtactttacaacgctagtattttccgtgtt  
ttcttcgttctcatcctcatcttcttcattttctcgtcatcatcctcattttcatcggtttct  
tcctgatcttcagccatagaccaaaagtttttgttcatattactgacagagtcggtaattttca  
tataagatacgtgttcgattaacaaaagtcctctaccattgtagtgccttccatggacgaagc  
tagagcagcagaaataaattcgggttgagaataaagaattcaaaataacgtgtttttctgcctt  
aatttacaccttgtatacatgtccgtgaccaaatttatcccttcaaggcgtcctcctagaagat  
aagtaccatcaatcaaaaagtacctgttattatcaacgctaatacaggcagtgttttcagctaa  
cctgaaggaattgctgtaccattactaataaacgttctagcattttccattttttcaacttca  
gccataattttagaaatgagagcagttcctgcatttgtaatacaagacgtatatttttggctc  
ttttgagcatattcttggcaggacacactggattagctaaaaatgagcatttgtatgcttggtc  
cgaaaaaatattctgcttgttgtagtctgacaaaaaatcgggacagtatctatcgtggaacaac  
tcgccttgttctgactcattgtcaaacattgaaggagttaatcgctcgtcgaacatccccgt  
ttctaatttggagagtagactcgatcgccttcttgttattcttaccctttgatgatgaaacaat  
acaggccaatcagtaaaagaatagcgggcaaaatactcctcctgtgcctttgttcaataagaaa  
tcgcaacacttcttaaagatttttgttctctaggagcgacaaatttaccctgcacaggggagt  
taaagaaggaattatccaagtagaaacccttatctgttctgctaaaaagttaaattatcctt  
cttaatggccagactagattcgtccagacttttccattaatgacagaccgcatagaaattaac  
atcctcttagcatccattgaatcttcttgcagaaggcaagttttatctgtaccaccttgatcgt  
catcatcatcttcatcgtctcgcgcagccagtatcaatgccagcatatagaccagaatggctcct

attgtaattgatgacacgaagcacgcgcttatggccatcagagttggtactttaaaacacggca  
gttttaaggatactgacaatttcaatttctgatgaaacaaagtgggacatttcttagtttctt  
ctttaccaatgaaacagtaatcattgtcttgttgccgataacaagatttgttgaaaaatctcc  
tcctcgtcttataatgttccctggtgtaaacacactgaacaactattagtgatccaagacgta  
cagaaattaccctcgggatctaaacatgaagacaaaacttcacgggcgtaaacagccttagcca  
aactagctgcagaaatTTTTTcgggagaaggatcagaggaattattgtctttagatttagcaga  
gaaagtgcggtgcagattcataagagggaaagtgtccttcagtagttggccatagtcttccaca  
ctcaggaaaccagaatggtatactgaaagtggaggggttgaatcggtaacgccacatggagcat  
tattcttgtcatttcaaagtggctattcttgaactattgggatgaatacatcccagttaca  
caaacgctaattgtgacgctcgtacaatttaatccacaaaatgttttagatttttaaacagcaat  
TTTTtaagcaaaactatctggttcttaggggacataccattgttacagttccacatcttacc  
aacttttataggtggtgatattggatatttttgggtgggtaaagtattgctgggagaaagtctg  
gtcaaatgaagattggttagaagagcccaagataacgtacgcgtctttagaatcgtaacaatc  
ttaatgttttctaatttttcagtggaagtagttagagaatcatcataagagacaataaatctt  
catcataaccataggaacattctttaaagagcttttttctccaaatcttgaattgaaacata  
tttcaccgatgaattactactgctattagagttattgtaaagttcttccagggctctttcca  
aacttctttttgacttgtcctcatctccagggccatattcttaatgtaacaaattggcataa  
cttgagaccagtagcagtcagaaatagattggagaaatagcgtgtcaggacctttgtttcagc  
aaaaccttcccttgtactggataaaaagttctcaagggacggccaactattctaccctcatgg  
cctgtatttgccaaaacactgcccttcttcttcttccgaagaattgacaacttcttctgt  
agaagttaaaccaaaacgagcaatcacttccctcatgtttcaattgggtcttcagaaattcatt  
ggtctgggttagcttcattattattattagagagaaggtgacctgatgaggatgatccaccccca  
caccaccatttctccctcgccaacagacatgtaatcgccaggacatatgatgttcatat  
cataaacgcttccagtatcagtcaaatcgcggcactcttttcttatcttgttagtttcttctc  
aactgccttattccaccttcaatggcatccattccagcacttaacgcagtttcagtgacaccg  
tacaagcatactcttttttcgagaaaggaacacaaatcttaaaaaagttctcaatgtcagaaa  
ttactttcacaatgtcattatttatctgattttgtgtgatcatgttcttaattcgggttaagtac  
atagccatcgtacgaaaacaagccacttctctgtcttcttctggttctggtccatgtgtatc  
tggctgaaaccggtgcgggatctcgagtcctcatcaactacggatgatgatccccgactagaat  
catcattgtaaaaaccaccgcttattaaaacctcctccgccagatttctttgatcgtccct  
attacttccacccttctctgtcatttgttttgaccactattatcctccttgttaattcttctt  
agagaaggatcgataaatgcttcttctggttagcgtccattacttttagcttgaccggcaggaatgt  
tgtggaagaaatgttagtggtgatgattctagaggacttttctacagcagcaggttgggcagt  
gtacaggaattactaaccagattgtagttagtatcgattctagtctcttgcagttcttggcga  
gtcttggcgcggaactcgtccaaagatttaacactgacatcattaacgtccaaaatacaacaat  
ccaacaaatcatttgaagaagcacgcacagagctctgccgcttttactaaaacaagccttgcaat  
acgtttcattaccttcccaacacgtttttcatacatatcattgctttttctgctatttttgtcg  
gccaaagaggaaacactaaccaaattcttaactagtgaaggggcctagaaagaagcctgcttc  
gccgtccatttaggacgtgagaaaatctataggtgataaattgcaaccaattactagtatcaa  
tccattaaaatcaaacgacatgagaatcttctcgggtcatttcttcaatgacaatatcattactt  
gcaacttgtccaataacatatgcggcaaacggtaaaaagtggagaggatcttcttcaatatcgt  
aaaatctaccttcttttatgctagcgtcggcctttttgggagaatctcccttgccgttacagct  
gcaccacttgctagtgattttaaagcatcgaatgagtggtaccattttatccacagatagacgc  
aaaggagcagttgcaatttctcgcacacttctccctgcatcatgatacagatacatagcgacca

ttgctagcacacaagagagggacatttctgtcttgagaacctcttctgttgagccatccactc  
tgcccgactgcgcaaagtagacttgtttcgtggataatattcgtcttcaacccaaatttgatgc  
ctaacatcattgctaggggtgggttttatcttcaatttcttaattacggtgttatttgtagca  
agttgcttgaatttatgaaattttcaacagatctaattgctggtgtctttgagagcaaactcata  
ggccttggcgacctgcgctttccagtccttattgctgctcattcaaagacattcccacgtatca  
gcatccaaatttggtgaccagatctttacaaaaaatgccctcgcgctaacgccagaaattctg  
atagctcaaatacggcgccagattcgtccacatttgacacacctgcctttaaatttagcatgctc  
actaccgtcccaatccttaactaaacttccccaatcaataggaaggctgttattaaagcactcc  
ctaacagtctctagaattgtccacagtctagaagctggactattgggtccagaaccgtatcttg  
ttatcaaatttgaaaagaactcagaatcattacttgttttccattcaaagctgtacgcatgat  
acattcttccatcattttaagcactcgtatatgttaagttttgaaacgttatggtccttgaaa  
taatttgctgcatctaaacacatctggtgacgtttttctttaagttccttctcagaaagcgatt  
gattaaacacttttagttggttttagaggatcaacaactgtagaaccagcacaacagactctaa  
atcttgattcgcacacaatgcccaataaccagaaaagaaaccattattaacactcttatctgat  
acaccatcacctcccgatgaacatgccaatctggctaaacttctaggcttaaactggttaatga  
gtttggttatcttactgatcacattttcatagatacccaaaggtaatgctgaagatagacattt  
tcctgccaatttacactgttttatggcatcccacctcttattatctaaaatagacctaatatta  
ccattaactttgtcctttttcacaatcctaaagctgcagtaacatcactaaagtatctccttt  
cacatgccattgtgttgaaacggagagctacagtcagatctttcagatgtttagaactaggaat  
tgggagtagttttatgcacttttcgtagacatgggtattgttactactaaggggagaatcgctc  
ttgaagttattaagagaagcacaagaacaaaaggaggatattggtgtgctggttagcggttc  
cgtcttcactattgacattaggcttgacaatctcgtacagcatagtaaaaggcactacca  
attcctcattctcaaagatcttctattaatttctttcaaatatcaccagattcagctgcagaa  
ttgtccaatgtagtacatcacacaaatttttctccatttctccacaatgacagttgaaacat  
acttttggcgatgacataaactggatctaaagttgaatgttttgatgaaattaacatccctaaa  
cacatcatcttgtacgttattaatactactagcattgtcagatggtacattttcatcatcacta  
gaaccaaattcgcctagaaaaccataacaatcatcttcatcatcaccaccataataatcacctg  
ttgcacctcccttggcagctccataattctcctcatcgtcactctcttcatcactttcttcatc  
gctttcgttactggccacattgttcaggatctggcgagcagaaacgctcgtcgttggtcacatttt  
cttagatattcttgtttttggtgatagagtttctcctcttctcgcacttcttgctgcca  
cagcttccttatcagacttgacgctggcaaaaagtcggttgaaagtctccatgggggagcattc  
atacattggtccaaaagacttggtcagattcatcataatcaaacgttttaaatgatcgttggtc  
aattcgtagaccattgtgctttcatcatacttaattttgcacaatttgctggttgcttgttct  
tgatcctctccatggaatcttctgatgctgcaactccattctgcagacagattgcttttcaag  
cacacttttgggtacatatatgctaagttctcggttaattgcgctcgcacatggtgctaaactc  
tcaaacctccttcaaatcaaaatcttcacgaattatttgctgatagtagtcttctggtatgag  
aagtgatgttgtagcagcgcacaaaaccgctcagcaagagtaacgactgtccacgcgaatatggt  
gtcgttcttgtagcaccgctggcgaatgttgacgtgatgatggacaagagcttcttgatattt  
tccaaagaagctatctgggttttcatcagatgacgaagtggtggtgaccttcttctagactag  
aaacataatctggtggttggtgatgatggtgatgacagcagcagcagcagcagcttcttcttact  
ttgagtaggtggaggaggaatactctccaattcttcaattgtaggaggttttagtgattctttg  
tgggtaaattgccacatttctgcaaatttgccctttgatagtgcatcccatgtgttattcttga  
gtctttggtgtagaatgtccgtatctctgggcaatttcagggttctggtctcatatctcacaac  
aatttgaaggatggcgaaaggcatgattgtgtcaaacttgatggtgttaacgccagtc aaattc

ctgataatgttctttggtttctggtttcacgcggtcaacacaattcttcttgcctcatggctttct  
ggggaagaagaactccattgcccagaagaggagagttgtcaatgtcactcagaaagaaccgtg  
tttctcttgaagaacacacaatctggccaagcttatcatcgtcattgatgatgctattatag  
acattggcagcaaggggagggatttgttttaggggctggaggaggcttgttgatggtgttctcgt  
ctccagaaccgcccagatttccctccagatcctcctcctcattatcttcttctcctcgtcgtc  
tccatctccagaatcgtccaatcctttacacgccatcttctcctttaatagggtagcatttgtc  
ttggtcaataacaagccacctccttctgccagaaacttgtaacacatgccaatgttacagaaat  
cttgatccataatcaacttttgtttctgtaaggcatttctggccaagttcagaaaaaggat  
cttcttctccaatcgtcggatattggccatagaaccatgagggttttcgagatatagacacttt  
ttctcgaactttccagtgttttgcacatccactcttcggctctatctgccttcaagacacca  
gagaagtcaccatgttttcgttgctgatggagagaatgttcttcttttctcccaccaactgctc  
atggtgataggggaacgcagtgctcgtcactttacaatgtccgggaagattccagttatcactc  
ccgccaatatcaatcttgaaacaggcaacagttttcttgatcatactttcaacacggttcgacga  
ttctgggcatacattcactcagtaattcaagttgtacctttaagattgactttaacaacaccac  
atcttctgtgctgaaacagctgcaagacgttcctctcaaggatgggtgggtagaatattacc  
ttgagccccatcaaagaggcattgggtgatgaaggcaaccttaaacactggcacgctctgttgctg  
ttcttccacaaccagaaactctctgaaggcaggagtcacacatagtttctctgcactagaagt  
ttcttctcataaagcctcatcataataataagttccctgagaagctttccagttccaacgtgg  
ggctcttcttcatccatgcgctattttcttctggaagaacgctcattcagcttgtccagaa  
attgatcaccagtaatttctggaacctttttactttgtacatgccttcttcttggattttgc  
aacatcctttaaagttgcaggtgactgtacattatcaattttccatcgtttcctctgttact  
gtgtcatattcaacaacattacatccagcatacagaagattggtggggttgacactgccgtctc  
cgccgactctatcttgtacagctagatgccccatttgtttgaccagaggggttgccattcttgg  
caagttatcagtgactagaatttgttccccttcggtgagaaggagaagggtagacgctctgtg  
tcgtactcgggcagtttgttgagagacagatgcgtagagtcgttgggtcctcttctcatctgg  
tggcacattttattaagtgatctcgcacatcactttcaagaaacttgctcctccttaggttgag  
cacatttgccttaacatattgacgagtgacgtgtgctggttataagttttgtttttcttgg  
tagttattttctgaatgtaggataaaaataacgtaacttttcttgtgctggttgcaccaagga  
atcttttgatatcaattacagctacaactggtaagggggttgccgacgaccgtctgtatccta  
cggatccagtgctggactgtgaggcagagagcttgtgagggcgtatttatacaagaatagcag  
ctggtgccaactagtgatthtatagaacagaaatcatggaccagtaccagaagtgaggggatac  
tcctcagacagaacaggaacaggcggcggcgaacaacaacagcagcaacaacaacagctgcc  
gctgctgctgccgctgctcctacgcagtacagtaacactgtttctgcagaaactttatccgcca  
tttctgaagatggaaaattggagagggtcaatcgcagcttcgtgctggatcaataaccttaacc  
tgatgaaaaaatggctcaacgtgtccaattccatccacttagttccacgaccacatacattca  
gaaaatgtgaacctggttagttctgttgtgtttttgaagcctagagccctcccaccgggggca  
cgtgttttagcccccaactacattgcagtgctactcttcgtgctgcgtcagaaattatcgattc  
tattgcatcaactagtctataccaatgttcaatgttcaattcgtggaatcttattccattttt  
atgagtaatagcaaacatagtcaattcgggtgatcgtgtcatcaagagatcaatgatccgtaatt  
gtttttccaaacaaaaaatgtagaaaatcttttaagggaattgctgcaggagaaaggtaacgc  
cgccaaggcattttctcatgcagttcaacagaaatcagcagtaataactgcccttgcagcatgg  
aacgcgggaagtgtgcaaacctcgaaaaattagtagatttttgcaattgaagtacagtcctcg  
atagaaaatacaagcaggaggtcttttttagtgctcagcaacagctcagtcacaatcaggtac  
ttcttctcctcagttgaacatacttctaattgattttcttactcgatatacctaaaacgtcacaag

ggaacgtcccttgatttagattcagcaacaaacacatttgatactgctctttctagggttttta  
ccgagtttaaggaacaggctagagcagccgtagatgcagccgcagattcagatcacctatccgc  
gtcggaccctatcttctctattgttcgacacaatagcaggcgtgagggattctagattcagtg  
ccaaatatcggatggttggtccacgatcaaaatattctgtcgcagagtagtctgatggcagaca  
gagacgagctcgcagatatcgtgctaagatagggacaaagattgcaacagatcttgaagcatt  
gagaggagataataataagagaagagcagatacttcagtcgatgatctcaaagaatcactagcg  
gattctattgaaaaacttccattaaaaataccggcgatattaattcggtcacaaatattcca  
cagatacagaggagtatgaatcttctccacatcacacagcttttcgcgcaggcatttttgga  
aactatgggaagtttattgagctgtgctttcgggtgtacagttccccttctcagatgaaggttt  
gcggtatcgaaggattatacgtaaaacagatcctgatactggaaagtttcagaaatggacc  
cttctctctttcagatcaatatctcttgttggtaggaaatccagggttctccctccacgt  
ttcagatcctaaggatatcgttttcggtagacaagttacgcctaatacgcctatcttgagtac  
attactagatctaaaaatgataagaatgaaacgtctactattattaatttcagggataggctt  
ttgttaacgataccgtgttgagagacgccacgcaaaacgtctcaacttccacccttctcaaag  
aagagtcccaccgcccgcagggtgaaccaaaaaagccaatgctctctggttgcctacctatc  
aggggaccccaggtagtgaccagggaagtgatgatatgattagtggctctgtgggtgattggt  
atatctctttgggggtctattatgccatgggttcacgcgctgcagctattgccgctggccacca  
gagagctctcgttccagccgagtcattaattcaccatgatgaaaaatctcaaagaaggga  
ggaaagtatacagaggaggaaaagcgaatcaagaaggctatgcgtaggaatgcagatcgttctg  
ctaggatcttggcttgggtggggcaaaactgatgccagtatgggtatgtcgaacataattctac  
cctagattcgttctgggtcttcgaatgccgctattcgtgcaaggcaaggaggatgctcttagc  
cgtgcagaaatcttggcagttaggaaacaattggacggaaaatgttcctcttcaagggatgaat  
attccatggtagagagatatcttagagactcatttttcagggtcagttaataggtcaggaggagg  
atatgaaatgttgatcaagggtttgatatgggaagatttgccgactttttgagtgacaactct  
gctgccaggaacgcttggcaacagtacgcagaagtaatgagaggacttctaaagcatgagaaac  
gctgattcaacattgaaggctttttcagtgctctaaattctttcaagttcccccttgttccaga  
acaggggctgtaaaaagactgttaggtggaaggcataggcttaacaatttgaaggcggccaataag  
atcattaacggcatcacagagatgactctccagtcagccatcgatggtagtactggaatctctgata  
ttattggttcagttagcagatgggtggggaaatactacagctcagccgtctcgcgtcaaagctct  
taaaacattgtccaatttcagcggaaacggaaatggtgtgtcaattccagttagtcgagcagta  
aagtgtgccgcgggaagtcgaggtggggaaactctcaagtgtgtggacattccttcagtcatta  
ttgcaaacctaattctctgataagagaattctagatcaactttgcgaggaggaggatgaacctcgc  
tcacgaaatcaciaaactttatcgagacgattgcaggtaaagaacatacaggaaaggaatccggt  
ttcttgtctcctagattgtctgtcattcttttgcgttatatttggttcaacgcagcgggttgtt  
cccttacggatagcaacattaaaatgccctcaacacaatgtccgagggcactggcgatgacat  
ttatagggactatgtggccatcagaggcatgggtaataattacaacagtagtctctcctctatt  
tcagtcgaaggctatctccgataggatcaattgcggtagtggaataacttcaaccagtaataaga  
atgtgaccattaagactcaagggtgaattgtaactgtccttcaacagactgctaattgccttgtc  
cgctttaccaacaaggaggcgtgggtgcaacccccgatgctgccaatatggccaacggttatt  
tccccaatgctaattgcggatgtagttaaagaacaccaacgtgggttgtttcagggttagatagga  
tcactgagaccatcaacttcttttcttttctcagatcaaaacaatgaacgagaacattga  
agagtattctaggagatataggctaggagaaggactagataagaagaattggataattttgtg  
tatccaaatattgcagctattgttaagcgagaattgggggtaagtgggtccgcattgtccagta  
atctcgatactgatcgtccaattactatcgacctgaacactgaacagcctttgatcgtaaaggc

tagcaagggttatgcctctaaccgctacgctaaattattcaacaaaacaacaagaacagcagca  
gaacaagctcagatggagcagtataatgcacaaatggctgccactactattcctcaattagtaa  
acaggttgaccatccctggatccatcacggcagacactgccatcaatgtcgttaaagctttcac  
agaaaatggagaatthtagtaacgcagaaacacacttgggggttatgggtaacgcgattaatgaa  
atgcaacctcttttcacggacggattcaacgttgcaacaagcgtttaacagttaacgtgggt  
cagttagtaagctgattcagaatgggttaaccgtatctctcattcttgctcactcaaaggctag  
cccctatgtctttaagcctctcgtgcaagatttcgctaagcttttactggcagtcactgcagag  
acttctctgggtgtctctaggtcccagaagagtttcttccccattcctccttcagtatthtct  
caggtggctctttcaaaattgatagggaaatgttcgataatatgaagacagattatgtagtgga  
agtaattagacagctatctaagaatgctaccgcccatcgaaagggtgcaatgattccgattca  
gctgctaggattgccaagtcaggtgaaatthataacaaggatgttgcatcaaccactgcagctc  
ccggaacttcttctccgctthtaacctgttcgccaataatctccagaacctgcaaaggatg  
gtctatgggagctctccccatttcgatatggccgtggtacccaaaacttcatggcatttctcac  
gatcaaatgttccgcctatctacatattatcagggatttcataagatggaacttaacagcgatt  
gcaaaccagaagaatgggataattctcttctgaaatagggttagcaaattctttggcctttc  
ttcggtgagcgataacaaccgttcattcaatthggcattggatactcttttggcttcacctgca  
gagattthgcgatctgggtgacgagggaaatggtaagaccagtaacgatattgtgcataatattg  
gatcgaaatccaacacggacgcgcttcaaaagagccttcaagttgggtgcctcagcagtagaaaa  
atacgacgagtctactctttctactaaagaaactgacgtatattcccttgthtctgctctggct  
aagagcaaatctcctctatcttcttctcctcatctttgtcgtctgagggacatctcacctctaagg  
agattgataggacatggaacacccccgctcttctcggtaaccgctaaaactacatcctattctgt  
ttctgaagacgctctcaatgctcctctttcagccgtggtggactthtagaaggaatgthtggat  
gctactaaatctctgtacgaagttgcagctgthtgtagtgtcatgagtaaagaggaggatgtgc  
gthcttcgagtagaaagattatgggaatggtggaacaagaatcgcccgttatgcaagacattgg  
cattgaccgcattgctagtcttgthtagtacagttgctacccccaaacagcatcgagattctta  
cagacagtaaacgattacaaaaattatctcattagaaaagttgcatcgaatccccttctctct  
caagattgggaggaatatcccctactagtggtaacaccgattacaaccttaagctgtatatga  
tggtgthtcttctcctcatcatcaatgacccccctcgtccatgtctgtctctgacagattctgg  
tcgggagtatthtctcagtgcctagagactggcccttcaatgthtggccgatgctgggtcatggag  
gtagtaacatgthtccaaatcactgcacctaaactthacggthtctagagtcaacacctacgcagc  
tctgagctctggcgttgagcggctgagagactctatthtcttctgcgactcaggaagaaagaat  
aggattgcaaagagcatcgaagctctggaacgthtctgtaaccgatgtgggtggggggagatactt  
tgatcaattgctgaaggcccagaacatgtacaacaaactgtcagatattacttccaactctat  
ctatagtgatthtccgaaacattgactgcgctaaaatcatgaagaatgtgacgagcaagaaaatg  
accgctagacaacaatcagatactattcttagctctctcttgcacgaactcgtggtggttac  
acaacaacaacctcaatthggtactcaatthgctctggtcagccatgthtcaaggcaaagta  
tgtcactaatgacctcaataatatccacgagaaggaaacattcagthcaatthgatggccgtggcc  
ggtgthtggcattactataatgtgtcggcagctgccatgtgtcagcgtctagthtcttccgacg  
taacaatgthtctcggcgaacctgctccaacaaggctgthtctgthtcttcttcttaacaa  
cgtactthtctcccaggthtctgataatathaaaatgaacgaatthaacgatgaaacaaagtct  
ctthtggthtaactggtaggattthtgcggtacagthtctcagatgcgctaggatctaggcacgtgt  
cttcaattagacgtgtacagaacgaagaggataagaaatthagacaggagthtthtctacatcact  
ttattcagcatacagagattthgaggaagaagactgaaactatacagggaaactgatactatthaac  
aaactthtccggacatcaaaactthtattgtctthacgaatcttccatgctcaagaggacttcttgg

tacatgacgctgtttccggccctagggccaagaaggtacagcacccttgaggatgtacttgaggc  
tccttccacgggtcacaaatcgttcatggtttcttaccagagagggcagctgcttctaggcga  
gtgaagaggggctggactcagggctctggctgataacaggatggaatctctttacggggaagaag  
tcttgaacgatatgaggtcttcggcggctctctccgaaatgatggatatagagtatggtgaggg  
aggattcatgatgatgattagtgatgatgaggatgatattgcctttattgattccgaagaagag  
tctgaatcatctactgatttctcctcatcagatgaatattccgattcatccgatgagtatgatt  
ttgatgatgataataatggccagtctccttattcaactacatcttattcgtatgatgctctaga  
ccgtctgaattctgccgctaagcctcttactgccatctacgggtgcaggggagaaggtgaagac  
gatgaggaaaatgacctctatgaagaagaacaagaaaggaggagacgctcgctcatcaaatgag  
ggaagatccttagagatcttcatgagagtgatgatgacgacgatgactactttgatgacgaatt  
tgatggcgaacgttcaatgtcagaaactattgcaaccagaagagctggccgtattcaatatggt  
ccaggtttcctatctcattctaataattcttaaccgtccggctaaagcacgcgctttcttgacac  
gaggcaagaaattcaggccttctgcgtagcatagattctttatggaggatgacgattccctcct  
cttctctgacgaatctaccacttcttctcctcttccgattctccattctcctccttcagcaag  
gggagaaaatgcaagcgccgaacaagcgaggaccaatgtgcctttgttaagagagttgtacgtg  
cttttgtgcccaccagagtaacaatgatcaatggtcgagttagcatgatcaccacagtgactag  
tgaaaatacagtaggattctatgaaaattaccagaaggccaacaagaggggaaagggcgctctg  
atcgaagaatacaaaattggttaaggggtgcttcagctaccttgcccgcgaatacgtagagggta  
gagcatctaaacaagtgtctccaggggaactgaggaggtctcttatcaaggcagctgcttatgt  
tgcccgcacccaagaaagtaacttgaatattatctttgacgctctcaccacaacatcaaacgcc  
actctagttaatgacccatctactcttttgggtgatacacttttgttcgccaacaactagagg  
caattaccgagagagggaataggctaataaagacctaactgaaatctctccttcaactttcac  
atcattcgggtgatgcaagtaaagacacccaaatgatggccgatgccaacagatcgtttcagga  
ggaaatctcaagtctgcccgtatctaggtgtccctctcagaactcttgcttcatgtattaagg  
gcactaatacagttgatcgctcttttggctacccaaaataagaacctctcgaatggatgaccac  
agccgctattgtttttgcaggtcattcaacgatactactttccatgcactcgaagatacacta  
aaaatgacctccgctttgacagacatgtacagcgctttcaccaacctcgctcggatcggaacatt  
ctcagcgtctaaaagtaaagagtactcttttagattctattttcaacactaggatggctcacac  
tgaagcagtcatgggtctcgtataccctacagcgttcatcaacctgaaatgccctctgattac  
acacagcgcagagagatgcaatcactcgctcttaacattcttaggggagttaattgtagccaat  
tgccacgaaaggatattggagacactgctggcctgttgaccttattacatcacgtaaatttgc  
aggttatggaggagaaaggggaggtttgtctctatacagaatgtccattggttgatgctctttct  
tgcccctctgacaatcggctcaagggagcagctctctctagaggtaggaaagtggcaggatattg  
gagaggaaatcttctacaagaggagcaacgatctggctcatttttgttcaaagaacaatatttc  
tctggaaaatgccgtaggtcctattgctaggtttgttcccaatggaactaacatggctgatatt  
ggcatgaccgatatcatttctagaacagtcaggatgacgcttcaatgatcaggcttaggcgag  
cagaagagggcgctggcgcagcaggaaaattcattacagcctcagccatgggtaatttgtacgg  
aggtattgataccggtgtgaaactaactgaaaaactatacagactcgttcgttctgctccaagat  
tcagactcgttcaatacaccaacagaaatggccactgctattatcaaccgatgaagtcgagga  
aacataaggctctcaaaacaccattcggggggagatattgccacctataagaacttcccatcctc  
ctctgaagcaattgtagtttagagccaaggaaatgcgtaactctatttagcactatcgtgatggac  
attccaagtcaaggggaatcaactcgttctcatcccgcagtggttctactttggccaagattt  
ccacatctgaatttgaaaggatactagaacatctgctgttctttcaaatacaaaggccaatct  
gagaaccattgagaatagactcgccgaacactacaacaactaaaacaattcagccatattagt



aatgatggactttccgagacacgcgcagtcggttgccgtaattgctgaatctttaacccccgtgt  
atgicggatgacaccagcgcagagaggagcatctgttagtgaactattgacagacaatactctcct  
caaatattattggttcaaaatgaaactgaaaaacattgaagaggcaaaacgtcacgtgaccgcccga  
attgaaggttcatcccaactgcacgaaaaaatggttgagcctgctcgttgccctcagccgacatca  
accgtatgtccgccccaaaataacctcgaatgtaagaaattgactgaaggaaatagtaactttgt  
accaatgactaacgaccaaggtggtacattcataaagcacaagaaacaggtatctggctgaag  
accgatgaagaaaataacaccagttctatcaaggacaatgatcagcgtagagttagctaaaacca  
tcctcgcgaattgttagaggacaatagaaatgcaacctccgttctcgtctacagtctctttgctt  
tgaaaaatattgcatgaacgacatttttgcacttgatgatgccgatattaagaatatggacaaa  
ctcattgaaaaactaggcgaagcactcgcagagaaggcatctccttctagctcggccatttctt  
cttctcatcatctaacacaacatcctcctcttcttctcccagttcttccccatcatcatcatc  
ttctctttctcaatggactattcaacaaccttgccaaaactatcccctacatgcctatcgtc  
ttccaaaacaaaacatctaattgtcaattcttctgacgcacatcctcatcaccatcatcatctt  
cttcttcatctgccaatattgataatggttgagcacaacaaaagtggctctccaacaacttcaaac  
acaagaatctaacgatttgagtaacgtactttctgttaccaccaagcacagatttgctctcat  
aatcaagctgcaactggtggcatcttcaacggaaggcaacacgcagagacagttggttgctatac  
caaatgcaacaaggctaataataatgccaccgtttccgcaggccaaggaattcttaccgctt  
ctcagcccctgaaaatgtttctcaccagcatgcaattgcctccatcatcatcatcatca  
aatggagatgataataaggtaccagtaactgtcaggcttaaccagtagccaactcaatcttat  
catctattgaaaacgcatcagaatttaaggacttgaaggaagcagaaaggaaaatcgatctggc  
catccaggcagcttccaccacagaaacaaaaggaaatggtcaccgtgtctaagtgccctctgct  
aaccagactgccatcactgccatctctcaagctaaatcccttaagaaaagtgccctcgaattat  
tggaagagttatcaaggcagtcgaggtttacaccccagattcatctattgcagccgtttctct  
tcccgtaaatggagattctatggtttcttcttctcctcgggatcaggatctgctcctcttcatca  
tcctcctcctcatcctcatcctcttctctaatgtgacagactatttcaactatgcttacggaa  
aattgaagaacattgatgaaaatactgaagaaggggacagaaactgtccagaaaaacatggtcga  
acaagatgctgccgttcgcatccctcttctagtatcatatgctccattcagcgaatgatgaga  
cgtgctattgacaagttgaacgaataactaccaactgattgatgccatcaaaacaaagatcgtgt  
cagacactaaacaggcttctcatgggcatcaaggaaacggacaaggagcttgatatggacaa  
agaacaggtgatttcaaagattaataacttgcaacaaaacttttcaaacgaatcagacaagata  
aagatggctattagtgttttgacaacaaaaggaacgaattagagcttcagaacaacaaaacta  
ggagctttattgaaactacaaagagccgtatcgaggctgggtggaggagatgtagcaaacttcaa  
ggagattatcgattacgaaaacacatctgaaaatgacaacaatctcttccagagcctgaaagca  
ttcgctgctgataactcggggacagtttacacccccactgacatgagcaatggaagagacacaa  
aatcagacagtaaatgtcgcacatgtacaacaaacagatttctcagaggaggaatcaaactcat  
caatgagggacaaaatactgtaaaggtagacttttcaaaggctttggaggctttccctagacaa  
tccaacgggtgcttcagagcctgtatcttcttcagttgtggagaggagacagcgcgagaacgtctt  
aggctgtcgcagatgtttatggcaataatgatggagcgcaccgagcgtctgaggaagaggttggc  
agattcggctgctcagtggaatactgttaataatgtagaagaaactgttaatagtggatgggt  
aacatcaagagtgaaggtcacagagattaggaatcaagcacaatcgctgaaagcactgcac  
taaactccatcaacgacgagattgtagagtctcctctcaccctctctttgggagcacgagtcga  
ccagctcttgatcaaggtagatagagtaggaagtatccaacagcagcaacagcaacagcagcaa  
cagcagcagcttcccaaattgacagctacagaacagagaaaggaaacaacaatacgtctgcagata  
gggttgtttacgatccttcatacacctgcttctcgtcaacctcttcacgagacaattaaactgat

ttcttctgtctataattcaaagaacaagggctcctctcagtaacacacgtgggtgttcccactagc  
gatgccgacttgcaactgatgaccatcactgacttgtctaggtctgtactcgactcttcttcca  
cttctccaagaaaatgctgtacgaaaatgttccctcatcaattgttctctggactctgccagca  
atgCGcaatgatgatcaccaacgtccacgaagccactcatacttctcctcattcattcaatttc  
gagaacaaaagatccctgaagcagctgacagaaaatgttgaacgctgccacttcatccagtgacg  
gtcctgccgtgagacacgatgtactaacaatgtagagtcacaacaatggttacgtcaaagattt  
tggattcactcaccgcaaaaaggttgCGtgtatcaccctggttaatacacttctgggaggtact  
ttcagtggaaatgttgcacctaatactggtatccttccctacttctgagttggttaactgccag  
gagttgaaaatgacaaaatttagatccatgggttaacaggacaaccgacaagaatgtggctgacgc  
accaagtcatctgcaagcatcgtggagactcttgtctgcacgtctcccaacgCGgagcacctt  
tacttccccttcaaggaccagaggcgacacttcaactccatcaccgacgccaatcatttctggta  
tgagcggCGaatcttcatctcaattgaacactacttgtgatcaaaaatctggtaaacattgatca  
aactactggcttcccagtggttacaggaagaaagcagggCGaaagaaggattgtgcacactgaa  
aacactatggaaggagctCGcaaggacaagaacagtgGCatcccttcatgtacaaaggaccgctc  
aaacttatatcgatatgggcacaaaattcatggttgcctcaggctctcttctgaatgctaaca  
ggaagaaactctccgtctaaacaggctttcagacattaacaacgtgagacattatggcactgat  
gttcatgtggcaggCGcaactctgcatggagaattgggtgaggtgggtgagagccCGcctcctcat  
tccctgacggagataaggaatcggctatgaaaaagatgcttcttctaggatctgtatctgccat  
ctctgctcaaaaatctgccagtcacattaacgatcctactgcttggttgagcaccaacacgtct  
atccagaatctggtcaaggaagcttcccagaccctggttgttccctctaattacttggggtctg  
ctgaatctacgttCGccactcaactCGcctaccgCCagCGcctggttccctaaccggagatgacga  
aaacgTTacaaccgTTtcaaatactgCCctatggatttgatgggaagtacaagCGctacaat  
gacgcttTcaacaacatcttTggctctaaaatgacatctactaacaAAAaggggtcaaatTgtg  
aaaatctactgaaatctGCCatgtctaacgTtctgctatcaacactGCcttTggagccttTga  
agaagcttcatcttctgtcaggaataggcttctccccttTatgaagacagcaccAAatattCG  
tccaaccaactTgctgtacaggccatgaccgatactgctgtggatgcttTgtccgctgttTcta  
ctgtTgtCGgtCGccagaatggcagaaatactcttcttctcctacttctattacttctat  
CGcaaccagTggCGtccatcactctcttattcttCGgacatgaaatctaacctcatcaagaca  
atttcccGCatcaatagagacgctagcctcctgtcaatgggagacagccaagtagctgcaggtt  
cttcttcttTaaactcttTccttCGttcttcttccatccctgtcaccaccagccaggatggaaa  
tgtTgcagcagCGgaaattgttctggggactattctCGacaagactgtTggagatcaacaagaga  
ttCGagatgctTggaggaggaaaaatggTcCGcgggagTcctgaagctCGtgccatccagCGca  
atacaatgtcctctattctccagatgaacgaaaatgaactCGctCGtgactTgtgcgaaattga  
aaataaaattgagactaggcaactgagggatgcttTccaggattTgaagaggTctatgctgatg  
actccaggaggCGtgggagccatttcttctggagcaagtaccaacaatgttccccttTctctt  
tcatgtcagTgtCGatgcatccagCGgtcttctgatgaacaacaacagTgccaatgtaatgga  
agctgtggatagTtTcaactactccttTgctCGttaggcacatgatgtTggatagTggaaag  
tccccgTtcccatggccaaggaaattaggagcatgctgacccaaccaagagctctcaccgccc  
gCGctctactgagCGaatcttcccctcttctcactgaaatctGCctctacaacaccCGcgacac  
tcaaccagaaaagggcagTcgacagactactaacttcagcctatctagTaaaacaagctaaaaga  
ttCGacggagTtgaccagccttccctgCGcCGcctcactgCGcttctcactcatgcttTctt  
ccatggattcccatacaaaagTcatcttTcatggacaacatcaaatTgcacatgactgatactca  
atgcttcttcaagaacattgaacgattTgagaaattctTgggaagatTggggacgaatacGCC  
atgtcccacaagcaaaaattgTaaactgccccttccatctcaccacactTtTactccctcagata

acgagcatctgggtatcctcttttcgcattcgcgccgccagaagtctccatggaagaaattagagc  
cacaccctatcaggccaacaagcttattagtgacaaacattacgtgatgaacatgtccaagatc  
gattctagagtaacaggatcttccctccttaagaaggtagcgaatggactgaaatgagaatga  
actccaactttaatggaacatttgaaccatcaagactcgccctctccaactctggcatgacaac  
ggcaggagtcaacctcgacgttattgtcaaaccaataatgcaagaagtgtactaggaatattg  
gaatgtcatcgccagcacgtgtgcaccgccgacccaaggggaactgtcgcttcagccatgccag  
ccgtcttcaggcaaccgatggaaacggtaacgaatctgaactgatccagaatgctctgccaag  
gaacagatacatccaaaagagcacaatgaacgctcaaactgtcgtgtttgctaattgttttgaa  
caacttatcgccgatcttgaaagggttatcgtgaacgaactggccggcaccatcgctgaatctg  
taccagaaagcgtatatgaaaacaccaaggaaatgattgatagactaggctctgacgacctct  
caaatctaataataatggaggagtagaatcaatggattatgaagatagcgaacaacatccaac  
aatgggtcccgtcctcatctcagaagccatgaagaatgccgtctatcacacactaatttcgggca  
aggcagctcgccggaaaatgtaccattcgcctcatgcgccagcggccctctcgcctttgattt  
ccttctgtcaaagggagatacattcgaagaaaagaacgccgaacaaggtgcagcagctgccgta  
tcctctacctattcttctcttctaactactcttcgtaagcatttggtcgcagttttcgaag  
ccatctctaagcaagtaactgatgctgaattcaaggatatcctcaacgatatcgaacgtaatat  
ttcttctgactataactgtccaccaataactaaccaaaatgcctttgctctagctatcaag  
agagaattcagcagaattgtttccttcttaaccattcttcgtaagaacattacaccgcattag  
tcgaccctaaaggcgcgttacacgagaaagtagccatctatttgacccttctttcaaccaaatc  
aaaactagaaaactttttccaatacggctctcagtaattcgtcctcagttgatcttagccatcta  
aaaccattaattgtagcaacaatgtcaagaatattgaagacacattcatgtacagaaatgtcc  
accctattcttattatggccctccagaaaatttcacagctctcttgcaacaggaacaaatgga  
ccccgatactgccattgaaagcagacgctcccttaccaccttctttaatcatcccaactgct  
tcaatggcgaacgggtgcaagagccgctgtgggtgcaggaggagaaaccaatgggcttgtatc  
tttcttcccacattcttcacgagctaccgtcacaacatcaaaccctgcacagacaccacaga  
aaacgtcaactatcattcctctgttacacaagatcctgttatggtagtgaacccttcaaggat  
tctgctaggttgatcggttaacaacaacaataactggaattgatgtcttgaatgataagtcgtgca  
actacttgcaagtatccatgccatctgaatcatctggcctcgtcaccaataactggatgctctt  
ttcttcttctcctcatcttcgtctgataccttcaagtacgtcaggagagacaatacgcctgtgaat  
cttccccgtgtcacaccagccgttctctgttctgatgcttctctaatctcttggacgtgttct  
ccagggcagatattgtcctcgaaaacatgaacgtgagatttggtttcatgcccgagattattgc  
tgccgtctccaaattcaaggggctgaccaaggaagaggttattaagcaaatggtttctcagaac  
aacatcaacaacaacagcaacaacaacaacggaaatgggaagaaaacaaccgctgatccagtca  
ctggggatattgttatcaccaatgccacattccccgacactcgtcctctatacactgcagcaaa  
tggaggaacatcatcattcaaatggggagatatcaacgacagaaaaatgcacgccaaaggcttct  
cccaccttctttattggtaaccaaccgcccgcgcaacagctaaccggagtgcctcttacatctg  
aggaatttccctcactgaagaaaaacgcaagaaaatcgcaggcatctctgaaggatcaattgg  
cacgggggctctgcgtgcagccgccaacaccgcctctcatccgacatggaacctgtcatgaag  
ggatggaacaacattgttcagcttcaacaacattcaagaaagcttcagataaactcactcatc  
ttttgagatcgggaggaattccaccagaagccaagaaacaaacgctattattaacaagatgca  
cgacagcttcaagacattggaggaatgtcgtagggtgatccaagacgaggctgctctgctcgtt  
gccaccagcगतcttttgaccgggtggctacggaggagatgctgctctggccatggtttctccag  
tacgtccagaaatgactggctcttattgggtgcaatctccgcgcagttagaggatttagccactt  
gttgaaactgggaggtgtttctgctgctaacgcagctatccgcaagcgcctcaacctaccta

tccaacgggaaaacactaccagaacatggaatcgtacacaaatcagccaagacacttttgcttg  
attcagactctattagcaacctatacaacactgatcttcaagacggtgtcttaacgctagggg  
taacaacaatttgggaagaattatgcaatctttgggacttaaggggaataatgcaggggatttg  
gtttattctgctagacaactgacggaccttattactgtaccagaatatggaaacaatcgcgatc  
ttaccaagcgtcaagctatccttaaaatgctcatttctaaccctgaaattctagaaaatggtgc  
agataccattttaccttacaacaggtaaaaatgctctcgcaccgggtatctgctcaggaaatggct  
tgtgctctctgacagtcggaggaagtggaggaggaaaactgtcatcagacgacaatgttcaat  
ccctgaaccgcctttattttcgggtctagactagtgtaatattgtatgtttaattttattgtgta  
acaattggtttatatttgtatgtgattttttcggacaaataaaagaattggaataaaagacttt  
gtattatttaccaaatttattgatttttttaaacacctttttatgccacggggttgattgtag  
catttccctcccctggagatttcatagtgggacatccaaagagtgtactcctagtgtgatac  
accxaaacctaggaggaatccggtaagtgcaggagtaacagaaagcatgaaagcgaccatgctc  
aatgcgatgacgacaacggccaagccgacgatgatgtttctggtcatatcagacatgatttctg  
gtatctgtttatagggtttcaccagaagtgttttaaacccaaaagtataaattttattctata  
ctgctcatctcactcttccgacctcacaaggagaaaagagtcagtcttgctccagccaccacc  
gaggcaggagctcctcggacgctcctgtatttttgtccagaaatggataaagtgttggttatat  
caaatactagggagcgcacgtttaaggtacctgccgatctactgtgcttgcaacagaaccgga  
aatctctaccaaggaagaagatgcaggtatagaaatcgagacaagagtgggtgggtgttttcaagg  
tgctctcgggtccaggaactacatacaataaatccaaatgatgaaggattttctgtccaacttt  
tcaaggactacctgaaattgcaatctgcacaaggaaaaaaaccattggtttgtacatccaaat  
aaaggctggagaggatcttgaaaggagattaatcagtgagggaactgcataacctggatccggca  
acacaccttttctatcttgatttctccctttaccctaattattcaatattcaatgacatttcat  
ccgctctgaaaatcattgatgaagacacgtacaatgggtgttgttttcttaacagtgaagaaa  
agagaaggatgcactagtgtgataaggggtgactttttctacgcatgaaaaggcaattgaagca  
gccataaaaaaaaaataatgctaaggaaagtgtttttcaaggatggagatcttgatttcgggtact  
tacgtataccaaaatctaaactggacaaatttactccctattttcggagtcaatacgggatagt  
aatgttgaaaaaaatatccctggttacatatggggagaaattatgaagcaacgagtgcgatgt  
tccagatgggtacctttacaacaccgactcggaatgggaatataaaaatgtggccgaagaaagag  
ttggacctcgccagttagtgaaaaaatatgggtgccaaagtgtgaaaatttatgttttagggacat  
agacctcagaaaaaaggaaagcaaaaggaaaaaagggatatagaaagagaaactgaaagcagatat  
gtggtcgtaacactaacccataagcatgaaatgcctgaaaatatgccctattttgaccxaaagt  
gttcagtggtgaggttggtgaaactagaatacttttatgttttgtggatgaaatttcttataa  
tgatgaagatgtagacgaaattttgtctgagaatagatcactaagaaatgtttctattagacat  
aaggaaaatgtacctgtacacacgttattaaaaaaagggtgtgtctattcatgctagatttacc  
ttaatggtttggtatgatgctttaataatttttaagagaataccaaaaacttattttgaagatga  
ggaactacaagccgcttggtgcgcatgttaaccttgaacagtacgaatggctttgttctaataat  
agaggggaataaagtagaacatgtaaagtcgcggttagtgactcgagcagtttaagcgtaggagaa  
aatgtagacactggatttattttgataaagacactttaaatttaactacaaatactttgataa  
aaaagttactgctagtagtggcatctaaaatatgtaatgcaaacacgactgttttagttttccat  
agaaaaatggaattggaagatttgactgagagcgcataatccaaggtagaaccttccccaataa  
attttgccaagttaaaatcttgcccggatgttaaatatgtgcagaaaaaacagatgggtacatt  
ttctgttataagattcttttagaaacatgacaaagggtgatcttattcaaaggatggatcttttt  
tgtaggtttattcccgactcacacactattacacttttgagtagggcggatttttatgcatgta  
aaagaggagaatctatgcatatgtgcacaaacaacaccgtattcttactacaaattctccaa

cgctccccatgcgcccatcgaacaaataaccaatatcatcagtgatacaagaggacgtaagggt  
atacacatagaatacgcgatcgaaaatgtacaagaaatgtacgaagaagatggaagaagatatg  
aagctaaatacactggaactttaaccgagtacaaaagaaatgaggacaaaaccttcaaatctct  
tcttgctcctcatttaacacctgtcaacaaacatataatattaaccattttgatgagcaatat  
ggaaattttgatgaagaattagaagacaagttgaggagtggtttcatttcttatgacacgtatg  
ttactgcaaaagacaactggggcaggtgtgcaactggaaagggggcggtgcatctaggaccata  
actcaaagtcaatactgggtatgtgttttttgagaagggtgcagaatgtgcacattaaaaacata  
caaaatgactacttcaacagaaatatcaaagaacctttcagatgtgttatccatcaaggcaact  
ggagattgggtgcagtaatatcaagacgggtattttcacccttcacagaaggcaagggaaatttac  
caaacagtctcccgtttacgagaagtcccaatacaacatgtggttcaagagaggcggcaaacgc  
cacagagcattttatcacctgtctttgcaaaggacaaatataagcggaaaagagtaaaacgtaca  
atcggattcacctcgcacaacacaaaggagttgacgcccacagatacttggtagcagatgtat  
actcttggcaagaagagaaaaatgggtgtttgaaggattttgtgtcccaccaggaaagtcgggaac  
atltgtacgctactctaataagataaaagttttctactagcagataccggaagatatatgaaa  
aagaagtacgatgatccagaaaataagaccagtagtgggggtgatgatgacgatgacgacgatg  
atgatgatgacgacaacaacaatgttgacgtgatgaagaaaacgaccccagaaatgtattcga  
ggtcgaaaaggatgaaaaatatgcctgtactttttcaatlttgggtctatagagcaatgaaaaag  
tctcctcctgtatgtagagggttattagtagagacagatggaccctcatctcaccctaaacggg  
ccccgtcagcatttaatccattcggaggaagttctatgttgaacgggttatgggtgcaggtgcaga  
tgactagaagaaggatgaagttgatggagttcctgaaagagagaggattacaaatlttgct  
ctcaagagaggacctgcaactggccagaactlttgatctgttaaactggaacatgatggatcta  
aagcagacctgtacaacgtcacgtgcttctccaagcagcgtggagtataaaaggcgggacgcat  
cagcaaatgcaactcattccttctcatcatctaaccatggctggctcgtgtagagctcgtcactg  
gacctatgtttgcgggcaagtctacctacctgaaaaacatataccaacaagaaaatggaggcaa  
taaacattgcctgtttgtcaaacactccctagaaactaggtacggttgtggaactggaacaata  
gtcactcatgccggagaagtgattgaaggttgactacagtttcttctatcaaggaactaatca  
gtgtgttaccagaagttgtggatgtgattctcattgacgaagggaattcttcacggattttgg  
gctagtcaatagactggctgacaaggggaaaaggattgtgattgcagcacttgatggaacttct  
gaccagcaaatgttcagtcctattcataagctattgccttatacaaatccattgttaagctag  
catctaaatgtatgattttgtaaaattgataccaaagaagctcctlttactgtaaggtttggtaa  
tgacaatgataaataatgttatatgtgttaggagagctgaaatgtacgctgctgcctgccgggac  
tgttacaaaaaaattaacaagaaaaagaacaaggggaaacttgttgtacttgaaggaggtgaca  
gggtcggtaagagtacccaagccaaactcttgttgaccaataaaaactcgcctctttatggagg  
agaatacatgtgctttcccagacaggagcagccatacgggtaaactcatcaatgattatlttaact  
aagaaaattgaaactagatgatcatgcagctcacttgtatlttctgcaaatagatgggaagttt  
gtagtaaaattaagcagttgttagacgatggaatccatgttgtgatggatagatattactactc  
ggggattgtlttctctttagctagaggagtggataccgttgagtgggtgctctgctagcagatgag  
ggacttctcagcccgatcttgtattgttgatgctlttagatgttgaaaagtgttcaaataggg  
atactlttgggtgctgaaagatttgagacaaattccattcaagaacgtgctagagccctattcct  
agacctcgcaataaggacgaaaagaatgtatggattaaggtagacgctcgcggcaccattgag  
gaggtgcaaaactaaaattataaataattgtatataatattgttgaagaataaagaattgtaaact  
gttccatgatgtgtttcttcttagtgattttcacatgttacctagaaagactlttgcccgaca  
ctgaaaatgattatlttgtcttggacgagtccttctggagaagggtgactatgataacaaca  
tgaactgattgtaagagttgggtgggatttatatgcagatatgcaagtcaaaatacatcttccat

cacgatgatccagagaggttcttttatagtgtggttgaggattatcaccatcaaagagattg  
ttgaacgactagcagaagaggatggggtattttaggaccgtgggagttttatcgcgcaaaca  
agtgaacctccaacacgggtgctacaaagctcttttgtcattgccagaggacaaatattgtaac  
ctattattacccagcaaatgaaaaccaacctggaaaaaatggaagaaatacagcgtactagac  
tcattcactctagaacgtacaatacaccagatagaattgtctgaccagctagatggatgtgt  
tataatgtaaacactttttcagtagcatgtaataattttgatatcaaatgaaaggaaaatgggt  
cagaaattggtagtaaaaactttattgtttctttcctctttctttgtctgtcactttattcgt  
cagacataacaaccataatactgagtagtgggtcttgatctttgttgggacattttgggtgtgt  
taaaagtatcacaggaaaaatcgtctcaagaaaggcaatggataattataggctcgtgtcggtc  
ctcggctctgtatgtggagcaggaattttctgtggataccagcaatattctacacctcagctg  
cacccatggcgttctgtctgtcttctgtctgcactgctactgctgctacatcaactattgtagg  
attctggatctgatgattatccaggcattgaaaaggagtaataaagatataataaaaatttg  
tgtgttttatttggttgataatacaattttcacctgtaccgaaaccattctctacaagcact  
gtgtctttggacacggggatcaatatcttgattttggatgaatgttctgacctcataatctt  
cttcattttcaaatacagaggaggatgttttctcagtagtctgtgtatttgagggtgaac  
aggaaggagaatagttgattgttctttgggtgtagatggaactcgtataccatgaattgtact  
cctccaatatctcaagatagatgcatgtagtattttgtcataccatctcgtatggctcgtcag  
tgctcaggtacaatctctgtgggtgggtgttacacatctttccactgggtgggagaggaagtatt  
atggttcaatattgatggaggatggatttttataacctcatgcaatgcatggtgaaaatttt  
atatgtttccgacaaggggaaaaatataaataaactgagcatacacatgctcgtatccagatatc  
taggtcgggaagaatccagaaacgattcaaaccattttctggaacattcattttctggaagggt  
acattttattgtatctggtgcattatctgtgtaccatttttgccacctctgtgtaactctgaca  
ttgggtcgaccagaggtccacctccgaacttgacattaggccgaccagcgggtccacctct  
aaactcgagtgagctgaaaaaatttttataaaaatttttgatgaggaaaaatagaagtaagatgc  
ttgtcaatgcatgctccctgtggaagggtggatgagataggaggagaggctatccagatat  
ctaggtcgggaagaatccagaaacgattctagccattttctggaacaatcattttctggaagggt  
tacaatttattgtatctggtgcattatctgtgtaccattttctggcacctctgtgtaactctga  
attgggtcgaccagaggtccacctccgaacttgacattaggccgaccagcgggtccacctc  
taaactcgagtgagcagaaaaaatttttataaaaatttttgatgaggaaaaaactaccagtgga  
gcgaccgtacacactcctctagctaactactaaccgagagagtgaggcagagctctgtccagata  
tctaggtcgggaagaatccagaaacgattcaaaccattttctggaacaatcattttctggaagggt  
ttacaatttattgtatctggtgcattatctgtgtaccattttctggcacctctgtgtaactctga  
cattggcctgaccagcgggtccacctccgaacttgacatcaggcctagccagcgggtccacct  
ctaaactcgagtgagcagaaaaaatttttataaaaatttttgagatggagatggagtgaaacttcc  
taggtgtaagggtgactacagaggcttgtgatctttctgggctcactctctagaaacgct  
tgctccagaaacacataaaaaagataaagtacattttctggaccactccattttctggtgtaact  
tgacattgggtcgaccagcgggtccacctccgaacttgacatcgggctaccagcgggtccac  
cctctaaactcgagtgagcagaaaaaatttttataaaaatttttgatgagggaatatagtactcc  
gtagccaacatatacacatgaacacatgaggcgggtctacaacagaaagagaactgatagctgtt  
ccagatatctgggtcggccagaaccagaaacgtttcaactcattttctggacaagccattttctg  
gaaagggtacaattttcttataactggtatatcattttctggtataattttctggcaccttctgtg  
aatctgacattgggtcgaccagcgtatccacctccgaacttgacatcgggctaccagcgggt  
ccacctctaaactcgagtgagctgaaaaaatttttgaaaaatttttgatgaaggaatatagta  
gtatagtgcccgcaaacgatacacacactcgccatgctcgtctagctgatagctgttccaga

tatctgggtcggccagaaccagaaaacgtttcaactcatttctggacaagtcatttctggaaag  
ggggtacaatttcttataactggtatatttctggataatttcaggcaccttcgtgcaatc  
tgacattgggtcgaccagcgggtccaccctccgaacttgacatcgggcctaccagcgggtccac  
cctctaaactcgagtgcgcagaaaaatTTTTGAAAAATTTTTgatgaagagattgagtaaaat  
ttcttgacgataagaggaggcagtaggtgaggctgcttgtttgatgtgtcagccacatctgcgt  
catacattatatttccaagaatTTTtGCTGACGTCAATGGACCATAAAAAGGCTTGTACGTCCAG  
agacaagTTTTAGTCTGATAGATTTCTTAAAAAAAAGAGGGTGGGAGGTTTTGTTTTGTGGGT  
tctgtgtgtgtataaaagataggtgcaaaggtagagaatcatcatatggacaaaatctgtccat  
gagacctcagtagagaacgcaccatgggtgcttcaactccgtgtccaggcccaggaccagttcc  
aacccaagaacttctttctacaaactttcttgaagctcacaagcttgtcgtggaacttcttctc  
ccgtcctacagtagtgatgtagtttattgtgactctgagacgtacaccaaactataaccgattt  
ttgggaacaagagtatagtttctaccattggagactatgtcttatcaaacccaatgaagatgt  
gagttaccaaatgTTTTCTTCCGTCTTAGAAAAATTTCCCTTGCTATTCCTGCACTTATAAG  
acgaatgaagaagataaaggtattcctctgtggaagaagttgtacaacaaaagaaaattcaaac  
tcctcaactcattgTTGGTTCATAACAACAAGAAGTGGACTCCTGTTCCAGCTATCCCGTTTGA  
cagggagaatataatgtgatgcttcaggaaggagtgttcttatgagtgaataatgtccacgtca  
acttttcagacaatttgcaaaaaacaacacacattactgTTTTGATATGTTAAATATGGAACGTG  
gcaacaaggaggagTTTTCTTCACTTCTTGTGATCTAGGAAGAATTTCTTTACTAACTTTGA  
aaatgaagaatggactctcatgtgctcagtaacatagcgaatcctatgcaatgaaaaggaa  
aaactagactcttccatacctgccaacggaaaaataccatgccctgataaaactaatgatgaag  
ggtacatcccgtggaaatagcaattatggaagacaattaccctgcattgctatatctcgtttg  
taggtatggagcatcttggggcaaacacatacggggatcataatgaatctctcaaagcgtttgca  
ataagaaatgatgcaaaagattgtctggaattatagagtttataagtgatcactacagtttca  
acaaaaatgtgacgaaggaagaatTTGTTAAAGAGAAGACTGTAGAATGTGTTGGATGTTTATA  
tgatattgaagacgagaaacgTTGTTACAACTCCCATGTGGACATTTCTATGCATACATTTTGC  
TTGTCTAATAAGTGTCTAAAGCTAACTTTAGATGTGTTAAATGTTTTCCAACTTTGATGACA  
CAATTTTTAGAAAATGTCCCCCACTATACAATGGAAAATGGGTATAAACCAACGACTAACCA  
TAAGGAAATGGATTTGTTCAATCGTGCATTTGACACATATTTAGATTTTATTTGCTCATATAAC  
GTCAAATTAGACAAAAAATCAAAACCTAACACAAACCTGAAAACAAAAGGTGGAAGAAGAAC  
TAGCAAAAAGGACAGCAGAAAATTGAAGAGGCCATAAAGAAAAAGGAAGAAGAACTAGCAAAAAG  
GACAGCAGAAAATTGAAGAGGCCATGAAGAAAAAGGAAGAAGAACTAACAAAAAGGACAGCAGAA  
ATTGAAGAGGCCATGAAGAAAAAGGAAGAAGAACTCTCAAATATAATAAAATAATTGAAA  
AGGGAAAAAGACGACTGAATGAAGAAATGTGTCAAGCTGAGAGATATTTCAACTGCAGCCATAAA  
CATGTACAAAGAGAAAGTGAGAATTAATGGTGTATTACTAAAAGATTCGGATCAGGAGTTGGCT  
GAGGCGAAAGAGAGGTTGAGGAAAATTTTATTGCTAGAAGAAGAAACAAAACCTGACAGATTTT  
TGTTTAGACCGAAACGAGTAGAAGAACGTATATTCCTAACTAAAGATGATGAAACGTTAGCCTT  
CAAGTTAGCCCTAGAAAAGAAAACGGAGGACATAATTGCGAAGAAAAACAACCAAAAAGGCAGT  
GAAAGAAGAGATGGAGAATATACTATAACTTCTCATATTGAGAACTACCTCAATCCACTGCTT  
TGGCTAGTGTGTGTGTGTTAAACGAATAAATAAAAGTATAAAATGTAATAATATTGTTTTAATA  
TCATTAATATTTTACCACAATGTCTACTTGTTCGAATTTGTTGTCAAGTATTTGGTGGAGGAGAT  
TGGACAACAACATTTCCATTCGACCTCGTCCATACACGTCAAGAGTGTGATAAAAAGAGAGAGC  
AAGACTACTCATTTTTCTACTGAAACGTGTAAGGAGAGAATATTGGTATACATTCGTATGA  
ACACACGTCAAAGATTATTGACACGGGTAATAATGATTCTACCTCAATAGAGGAAGTAGAAGTA  
CTGAATATATACAAAGCTATAAACCATTTAGAAAATATCCTAAAACCTCAACAAAGGAGAAAAAA

ttatactgatggatgtagaaacaatgatactggaaactcataaaatTTTaatgaaagggattct  
tcccaagggtaaaaaatggaagtttcagtacatgacgtacgctttgctgtaaataagaacaatgaa  
cggcattactacctgtatTTTgaaacagagaaagaagcgttcaattctatacaaaatctagtag  
attattataatgaaattgtagctcacaccaatgaccaaattaaaataataaaaagcgtgcgcata  
tttcatgtacaacttttctaactctccaccctttcaatgatggtaatggaagaacagctagatta  
ttgtatagttttctattgaaaggtaatggtatcgtacctcatttttcaccataacacacccta  
gggatcaattttgttgatacttttagtgtatTTTtagagaacatggagatggacgacctttattgta  
tgTTTTgctggaatcaataaaaaataagtaaaattcattttgaggcatttatttcttcatcaat  
tcatatggcatcttgccagttttctgtattggtatctcagcaataatgacgtaacacatcagcag  
atgtgcagattttatcccccttccccatccctcatggatTTTcctcctgcaaagtaatggaggaa  
agaatctccagtaatgggggttagttacattcaatacagcaaagaattggccaatatctttgtcg  
gccaactgtacaaaagctccttggatgacttcaatgatagattttccagtggtgt  
cacaatgggggattttatcaaacggcatggcggggatattgggggtggaatgggttgagaataa  
caccaggtcgccgaggagggcaaaccttcccgtgcttgtaaagctccttccacaggggctattc  
gtctgctttagttgcaatgaagtaggacagggaaatcgctgagtagctgggacagcactttga  
agctcatcttttctgcccgaagaagaagacagtagactctctccaacatcgggtgacaatattctt  
ccctcccacttgttcttgtacaatggagactcgcaatcgggtgaacatggcgctcggtagggagg  
agcatggtttgcataacatgctgtccgcggtgaaaaagtcctgctcggcaatggagaatatgt  
tttccaatttgcctataagttagtccattgctgctgcttgcctgctgctgcttaggcgtcca  
gaaagcgtgtgtaatttctcggcggaggactgttcttatatacaaaatcgttaaaggggtgacg  
cccacagataagaatgtgggttagacttgaatctatTTTgaaacctgacaaggcattttcttttg  
taaggggtgaataaggactagactcctctaccagaattcatgtgctgctattgcaagcaaaaact  
ccctcttgttccaagaattggctagtgggcggctgcatgccagctctgtatgacatcatttctt  
atgtgcaatggataattataatttgaatatttgaagtcgtcgggtccgggtccaccagaaagg  
gggcaatacacataaacatttctgggggtgtatttagtgattatctggcatccagaaacgg  
atgcaagcagtagctgaaactctctcacttttgacatcaatgaaaaattggacatcaacacg  
cattgggtgtgggtggataaaaagggggcaaccggctatgactaacaagcatttctcctaacctg  
cagccaagcaacagcatattacacaatggaggacctaaaatccactatcgagagagtatatgaa  
gaaagagtggagaatctagaacaatggacaaatactgtagaggaagaagaaggactgtctcag  
caatcgattctgtcctggaggaaacaaaaagggccctggacgcatgggaagcagcgataaagga  
acgagaaaacgacctcgcagtaaaagaaggatctcgcactcgttttcaacgcagcagacgcc  
aaaacacgtaaagaattgataaatacgtggatagccgaaagggaaacgtcagaaaaagaagaa  
aggaagcaacctctaccaataatcaactgaagaaccagatgtcatctctagtcaacacaaccaa  
aacactcaaagaaaagtacaacaatattacagaagaagtgcataactcaacatgcaatacatc  
aatacaaaaaggattatgaagcaagtcaattttgggtgtatacaacaatgcataagttttca  
aataaattttattttataataaaaagggtgttttaattataatttttgtccctgatgttgtgttt  
ctataattttactgcctcctcttggggtaagacataaaaaacgggtggcggggaaacgaggaaca  
gaagagcggaccagccagaagcatcatatccctggctcctgttcttatatttgtcctcatcatc  
gttatcgttggcagtgctcgtcatcatcatcgggtgtccttatcagtgctcagaatcgtgtcctt  
tttgggtcccatccatacattcatgacggccaggacgaggataccaattgagatagcaacgatca  
aaaagagaccatgagcagcatagacatggagccttcaagatcttccatgggtgtaagaagggcc  
agcggcctgggtcgggtcctgcccgaaggaagagtgttagtctggtggccatttttttctg  
tttgatgaagaggtacgtcaatgtaacgtaaacctgttgttttatcgtgtacggtttttgtc  
aggacaccttacgaacctatttgtcttttttagacttactcagcgttagttgtcgcagttgggtca



tgttccgtcaattctgttcaactatatcttcttcaacgccgggttaacgacaatcttagatccac  
ggcgtccgccttcggcagcggcctcattaaaaggagatggaactgaatttataaccggagaacca  
ccttctcataaaaatgaggggaccttcttatagcgttttaggacctgatccgtgcgaggaccag  
aaagggatatatgttgatattgtagtgtctatthttgcagacaaataatatacaggtaacaaaaga  
atgggaattgttttccgataagttgagaaaattgggtccatggattgataggagcgggaattgag  
aataatggcgaaggagaagaagatggagatgaaaatgaagacgggggtggaaatgggggaagaa  
ttgaagacagagaagcacatcgacgaaaaatgatgaagaattgtcctttgttggagagaaga  
tccagtcgctgtagatttaccacgtggcagagaaaacagtacagaatttgcacgctcgtttaaca  
ctcaaggaattgtgcgatttaatatagttgaatgtggatgcatcaaatacaaaagaggaactctttg  
acttcatttttgaagaaccgtgggagattaaagaggctgctgacgcttaggggtatggcaaacag  
gagtaaatcaccaaggaatcattaattgactggttttttgagttcgacacatatagtaaatgt  
gtagtattttttgaagcagtcgaactggtaacttgaatctcaagcgtctccaatttcattgggtac  
tagatgatataatattgttgtgtcttttctacataagacgccaaacctttttaactaggggcaa  
aaacccatctttaacagtggcttcatccttttctcccacgcccgacacaaaagcttttggctatc  
gacgagtgcgtgcaacacttttttaaaatcagacattaatattagccagatggcattaactgaaa  
gggactgcttcttccctcttttaactgaaatgccccgccaacaaaaaaaagtaaacaccttct  
ggacacaatgaagagacctaccttatcttctaccttccacctcctcctcctcttcttccaac  
aacaagagaaaagagaaaatactgccgctgccaatattcttcttccagtgtacaggagtaactttt  
ctacagcatccaataacaagagactgaaaactgatgatggggaaaatgcatcagcctgtattct  
tatcgaaggggtatgccaatggaaaaataagccctataaggattatggtaagaaaatcaactatt  
attccagaagtgtttaaccatcttttgttccctgtctttgcctctaagacactgggtgccaata  
tcttattttttatcaaaaatgaaatcctttgcaagtgcacttcttactcctccctggacttttttag  
acaccccaacaattttctcaacggggcctgcaaatggatgactctagcagaaaacaacatcaac  
gacaacaacataaactcttccacgatgtggagttacacgctagcagattattgtcctctgggct  
attacaccaagagagccctcaaccctatcagacatgcccgaattttacttgcactacaacaa  
gagactacaaaacgtgcagccattatacttttaaacactcttttgggaatactacaggacacct  
cagaagagtgggaaattccgtttaatctcttgcttaatgtgatgaataacaagtggagtagact  
cattccaggtgtcaaaaataagtgcaggtatcatatcgaaactcccatggaccatgaaaacaatg  
tacgagattgtttcttgcaccaataataataacaacgggagactactattctacatgcaggc  
gaatggtaatggaatatcctatcgggggtttattgcacacgcctgccataactaataagtatcc  
acgctccagaatggtcacctgtacaaagggcaagaccaccagaagctatatgacatctctaga  
caaatgtttgatataatagaagcaaatggacaactctgattattattattacggttacgaaaat  
tcccaaaagactaaaaaattcaatactgcaactgatgattgggttcattttattttattttaa  
tcatcgaatttgggggtttatttagatctcgaaatgcaaccaccaagagagcaaaaacttctt  
ccaacaatctcctcgacccaactacataattctggcagctcaaccagcaggggtccagggtct  
ggatctggaacaaacccaagatgacacatccgttgaaggaatagaccctggcttactgtaac  
agaaaaaagagtaaaaggcagcagctcgcttgccaattgtcctgttacgtactctgtggtttca  
cgaggttgtcatcaccaaaggtaacctttttttgtcctcgccgacaaaacgacatcttaata  
accaagcaacgttcgataaagaaaaaactcgatgatccttcttcttactcttccggctcgtg  
tcggccatcctcgccatcactgctgtgattgctgtatttattgtgatttttaggtatcacaaca  
ctgtgaccaagaccatcgaaaccacacagacaatatcgagacaaacatggatgaaaacctccg  
cattcctgtgactgctgagggttgatcaggctacttcaagatgactgatgtgtcctttgacagc  
gacaccttgggcaaaaatcaagatccgcaatggaaagtctgatgcacagatgaaggaagaagatg  
cggatcttgtcatcactccggtggagggccgagcactcgaagtgactgtggggcagaatctcac

ctttgagggAACATTCAAGGTGTGGAACAACACATCAAGAAAGATCAACATCACTGGTATGCAG  
ATGGTGCCAAAGATTAACCCATCAAAGGCCTTTGTGCGTAGCTCCAACACCTCCTCCTCACCC  
CCGTCTCTATTGATGAGGATGAAGTTGGCACCTTTGTGTGTGGTACCACCTTTGGCGCACC  
TGCAGCTACCGCCGGTGGAAATCTTTTCGACATGTACGTGCACGTCACTACTCTGGCACTGAG  
ACCGAGTAAATAAATCGTGCTTTTTTATATAGATAGGGAATTTAATATTACAACAATAAGAAA  
ATAAAACAATTGAGGAAATTTATACCATATTTATTGACCTACTTAACCTTCTTGCTATACAAT  
GAATGTTTAGGTGACTGGAAAAGTTTAGCAATATTATCCTTGAACGGGAAACATGCACCAATTA  
CAGGCGCAATTTACATCGCTCTCGGCCTATTGGTCTTTTCTGGTACATTTTAGATACAAT  
AGACAAAAATGGAATGTTTGTATAGATAGAATTGGCAGACAAATCTGCAGTTCTCTTAATCAA  
ATGGACAACATGTCTATTAACAATAAGCCAACCCAAAAGTCATGGCAGTTTCTGAACACAAC  
CACTGTTAATAAATTCAGGAGCTGTATGAGGATGGTTACTAAAGAACCTCTCATCAGTTCCCA  
ACATTTAAAATTGTAGTACTTTTTACATGGTACAATTAACCCAAAATCAATCATCTTAGGTTGA  
CCAGTTATTCCATCAATTACTATATTGTCACTTTTTATGTCCGGATTCACTAATCCTTGTTGAG  
ACAACCGAGTGACAATATTACAATTTCTACCAAACAAGGGCAATTGGTTTAACATTCTCTC  
CCTCATTTTTCCAACGATAGCTATGGCTGAAATTGAATCCGTAATGGGTTTTCTTGCAATTAGAT  
TGTAGACCTTCAGGCAGGCGGCCAGTAGCTTGAAGCATCCTAACACCGTACAGAGTATCCCTCA  
TCCTACACAAGCTGCCATGATCTTGCAATGAGCTCAGCGGCTGGCTTGGAGGAAGTAGTCGAGGG  
GTTAGGTTGCTGTACAACATTCTCGTCCATTTTACATTTCAAGTCTCCATTTAATACATCAATC  
ACAGAAATGCCTGCAAAATCCATCTCGACACAAAAACCTTCAACACACATCTTTCTCACACCTA  
CTGCGCCTTTCATTCTTCCCTCAAGAGCGTGACTAAAAACAGTTTCAAATACAAATTCACAGTA  
CATTTCCTTGTCGTCATAAACTTGATAACTTTTTCCAGTTTCAAGCATGTAATATACCCCGACT  
TTAACTTCGAGATATAATTCAGATGGTCCAATCATTACGACTTGAGAAGCATATTCTGGTTGGA  
CGTGTGCTGGTACAGGAATATTTCTGCGGTAACCTTTCCATTTCTTACATTGGGCAGTGACCTC  
CCCCAAGAGTGTAGTTTTCTTCTCCAATATAGATTCACATGCTCCAGGGGAAAGCTTAAAAACA  
TTCTTTGCCATGTGATCGATGCTCATGGTTTTTATCCACCCTTACCATTATTCTTGCAATACC  
TGTTCCAGTTCAAGAGAGGGGCTAGTGTCTAAAACGGATAGGTTTTTACTACCAAACCCAACAGG  
CCACCAAGATGAAGGGGGTGTGTTAGTACGGTTGTTAGACCACAAAAACTTGGACGCTTTTTCC  
TTTGCGTCAATACAGCTCTGTTTTATGGTCTCGTAGTTGGACGACACATCTTGACGTCAGAAA  
TGAGGCCTAATTTGCGGCCTGTCTAATCAAATGGAACGGAGATTCTAGACCGGCTGCAATATT  
GGTATCAGCCTCTGCCACTGCAAAGTAACACGGGGGTTTTCTAGCTTGACCCACTTGTCAATG  
GAAGAAAAGTTCCTCTTTACTACATTTGTTTCAGTCAAGGTATCACAAGAAGATTTCAAGTGT  
TTGGCCCCTTGACATGGGAACGGAGGACAGACAGTGGAGTATAGTCTCTAGCCTTCAAATTGAC  
AGTAGAGAATTTGACAAATTTGGATGAGAGAATCTTTTTCTGTAAGGTTGTCGGCATTGGCG  
CGGTGCTTCTCAACACAGACGCGGCACTAACAGAAGGCAATTGCTGCTTCTTGATAATGTCTG  
TCGCATACGTTGGATTTAATGTTGCAAATTTGATTTTTCATCAATAGTAATAGGCCTCTTCTTCT  
ATTTCTATAAAGTTGTAAGGTGTGCTCTCGTAGTCTCGCGGAGCCTCAAAGTCAACAGGAGGC  
GGTGTCTTTCTCCACCTCTCCATTATTCTTCTTTAGTCTCTTTCATGGGCTAAGAGAATAAG  
GAGAATCTGAGGGAGGGGATCGGCGAGTAGCGTTTTTAGAGCAACAAGATTTACAGCTATGGC  
TGAAGGTATCTTGAATTGCCCTCCTCCTTCTCCTCCTTCTCCTTCTCCTGGCGTTTTCTGATTGG  
TAAAGTCCCATCACGGTTGCTGGCGTAAGTTTTGTCCGTTGGTCCCACCCTCCATTTTAAACGA  
CGTTTTTTATACTCTGCTCGGGCTCTGGGTCAAGGGGGCTATAGAAATCACTCGTGGATAGTT  
CCTTATATATTTAACCAATTTTTCAAACAGGGGTTATTAATAACTACTCTTCTTTCTGTATAT  
ATTAGGTACAAACACACAATACAGGTCAGGCCTGCAAAGGACTGGGTATTTACCAGTCCGAATA  
TAACAGTCAAAGGCTTATTTTTCTTGATCTAGAGCTGGAAATGAGTGAGTAAAAACTTGCTGA

gacatatactgtctggccgccccttcccttattagcctgaatagaatcctcgaagcttacaacta  
cattaaatttccccataccggttctggggtttcaacatatttgacatccaaacggttacagttt  
catggatactacaccctcgtctcctaacaatcacagttcctactatTTTTgtcagccgcatc  
cttgccctcttgacagattctgttacagcgtcctggattttcttggccacagagctttaatag  
atctctcggacaattgttcaccataccctaaaacagcacctctggcagtaatggggcagtaatt  
aaaacagacaacagaacctccttctctccaaattctggtagatagattgtccgcttctttattc  
aacaataaacttcttagacagtttgaaataatgtccaattcctttactcttgtgggaaaagggtc  
ctccaataaatcgaccaaacaccccgcaccagaagaaagggctcgttagaagatggttcatt  
aacatcatacaaaaatttgacatcagaaggaggtttcccgtcttacaaaaatcccagaagtta  
gcagcगतgggtaaaatctgtacagggttcacctttgaagctctaacttctattacagcatttg  
atatgtcagtttccatggccttcattaatttggggatattcctattaacaaaatcacacatagg  
tattttcattcaggggtggatgtgggggtgaaagaacaagctctagaagcactttaagatgtaa  
tcgccagtgattgttgtgactggagtgttgattgggtatagagattcttgggtgcttctttccc  
tttctgatgcttcatcacaacatccatgccttcacagtcacgtcatcatcatcatcatc  
ttcactgtccgacatttgggtgggactattattattagtgttcttgacactgttaccaattttc  
ttgtacatttttcaatagttaaaacattagcattatcagcactctcattcttcattatgttct  
tcagtgaagatccctctccacgttgttgtgttggacacgtaagccttgacgatcttccctcca  
tgtccttataaaagtgtatgactgatgcataatttcttaccgtaaacaggtttatgagtcagcgag  
gcttggtagagcttgaaggcgtttgtccagtgattatatacagtcgtgtacaaggcctcgatgg  
ttcctttgccagctcaggggatgtagttttactcccatatctcgaatccatatgtagtagttc  
ttgtttgttgcgagaatgtccttcaataaagggccaacgtactcttatttaaaattttgtgt  
tcgaattcatatatcagcgaacaagttttcatgtctttgtatgacacacaacatctcacaagac  
agatgactgcagtcctcagaaacgtatcacttttcccacttctttctttcttctgtgtcaagaag  
aggtataacgttcttgtaccagtaatcgagtatagattctgcattggctgcgatggttcttta  
acagcttggggtaaatagatacagttctgtcctctccttcaaaaatcactttgtcttcttcta  
cctggcgccattgtcttttgttggtttggttccagagagagtaattgcagaatttttctg  
ttcaactaccagaactctataaagattttccactttttggaagagagatttctggcggtcatct  
tcaacaactggagccatgtctgtaccggagccaactttgttcacaactaaccgctcgggtgaatg  
cgtcttttaagccattacgggtccatgccatatctcaaaggttgccaatgaccaacataaatat  
cggcacagcatacattgaattgcctaataactataaaggaaggactcgataaccggaaacctata  
tactttgatcctttatctaaaaaatataaacgggatacttgcactgacgtgctggactcgttgg  
acgtgtcgttagaggactatagaaaaagtataggatggcgctcctcggggggattctttacagga  
atagatgaccttttcaagacagtgattcaacaagaaaaacaagagaaaaataaccaactcaag  
caccagaaacagaaccaaaaccagggccatctcaagctccagatccagctcccagaccagttcc  
taaaacaccaaccaatttctgtcctcctccacctaactctctcctcctcctcctcctcct  
cctaagccctcaagagaagaacgggtaagacgtcaaaaatacgtttaacaaagctcttagtg  
atattgttgaagccacaaacgagcgtgttgatgcgttgaaagagaaccaagcattaaatacaga  
atatgacaagaaggataattacttccaggttttaagtgctcgataaacacttctgtaccaaca  
gctattataggcgcacacgtgaaacaggtggccaaaagttagcgaaatcgaaactggccgtgaacg  
aactcgatataaaaaataagtgtcttttagtgtacaacgaaaaatgagtcgttaaaattttttag  
ggacctgagaaccttatactacaaattgccgtccagttattctctagggcacgataaacccaaa  
tgctggggggcagaaatatgtgttaaggcaacgaaaaaacaagtttggtaacaaactgggtg  
taaaaaaactcccaatgcaccatcctcatcttcaactgtgctagaaattagagggcgtaccag  
aaatttactggagaataatttcaacaaggagaaataaacactgtcaatgaaaacaaggacatt

cctccttcagaacgagccaacctggacacgaccaaggcagaaatatcgcacgtcttttccactc  
tacacagactggacactaaaaggaagcttttctttaaggcaacactttttatcaacgaaaacc  
aacattcgataataaattcaggtggacagaagttataggggtggacagaaagtgaagcatcaaaa  
caaaccactaaatcgctagacaagccaacggacgacaatttattcgtgctaccccattctttca  
ataatttggcagaccacttacgtttgaaatttaaaaacgtcctctataaaaaatagtaccgcaca  
tcccggcaaacgaaattactacaagactcaagagacgctaataaatccccagattgattcggcg  
aaagagtacaagatgggtctttgcagaaatcgacaagtggttgatggtcttttggccataggga  
agaatgacaaatacacaanaagcactgtcatacaatatagaggaaagtttagaaggatattaat  
attctgctacgccttttatgctctaaataaggcaaacattctcgcgcagtatcccctctacca  
tttaatttctttaaccttttctccttcatgtattgtcatgggtccgtttctccattccgccagt  
ttttgtccacattgacgttcgtctatcaacacatgtttttcccctatgggcacagccgccccatc  
cgtctcagccaagcggctcatggatatcgattccgccctaatgaaaggaggaaaggggggtgggt  
gtgagggatthttggttcaccttcaaaaacaagtctccatacaagaacattgggtgtctttcttag  
gttttgctgaaatggctatgggaacaatgacggctctcttatctgggtgtagaagtgcgtgtatc  
tccagctctccaacaaggatatctaaatccctagaaagatgggtgtgattcagtcattttata  
tatttcacctttgttttattccacagattcagtggtgcaaaaaagtatcactcgaatcggcgc  
ttcgcctcatcatggggcagacgcacgccacacaaaataagggtgagggccgccaagagatgccg  
aatagaagcagcggaaatggaagggtgtggaagaagaagaggcgggctgacactctcttatgcc  
catctattgggtcttcttactctatacaaaaagccctcggattacctgtccctaagataaacc  
ctctcatgacagcatcttcttctcaatacaatthaggggattttgtaggcgtggaacaacttct  
aaaggctaagagagaggttccagccgaaggagaaaccgcaggatttctcggcatgthtgataat  
ctagtgaagattctattgacaaatactacggcgaaggagccttttcagacgtgggtgaaaatg  
taaaacaaggcatggaacaaaacacaccgtatgacacatcttcagcgttgatgacacctatccc  
taaagcattctacgaagaagaaaaggatgttccacagcaggaagaaaattctacacaacaaga  
tatagattgaatagagacgtggaggaatatttaatggcttctcctatgaagatgggtgtttgtgt  
ctatactcgataaaaactaaccaaaaagaacgtttcatgtctgttggggatattgccccttctggc  
cgtgtgggtgcaaaaggaacgtactgaaaaaggattggaacgaatacgtctatcgctaaaggcaac  
tacgaatggcttgggtgctaaaatgtgcaaccatttacttttagctgatttagtgaatthtgaa  
tattaggtgacttgaaaataaccaataaacttgacacaaataccgacacctttcacagagacag  
tgatagattaccctcagttgcagatcagaaaaaatttataaaaaacacatccctatctgatcga  
aaacaattggcccttgttcaactcgtgctgtaacgtgagcaccgcaaccacgtaggaagagtga  
ctgcaacatcatgggctgtcgtatgcgcttctgtacctatacaagagggtgataaagacatgthtgc  
cgccctatcttcatcgtggatattgtaccatcttgggacacgaattcagctaathttgttcca  
tathttagtagaaattacctatgtaacgaacaagagaatggattgtgggggtatactcgcagaa  
cctctgaaaaattggccaaagaagaattgggaagaggacgttttagggggcctgaataaggtagg  
gggtggctaaaacagaactggctgctgcagccattgcaatthcttctgccttagatatgggggaa  
gtagaagctgtaatggacgactcttctaaagtgagaaaaatagcctccacctgcttaaatgtta  
atgcagccaaggctctcggccgacagagaaaaggcagagagaagctagtattaaacgtcttcttct  
ggccactaatgcaccagcagctggttcatccagaaacagtaaacaggthtctcctcaaagatttg  
tgggggttctthtctgaccagacaagcgcagagaagcttataaagggtgaagcagthtctgtac  
tatgtccaatacaggatttcttcatgctgctgttctgattthgttattgagthtcttctcga  
aagtgaaacctctatagtgagattacgthtgagactgattaaacctgaaaaacaagacgaaatg  
gtatgcccttcaacagctcccgaagctaaataagaagaggaaattagtaaggaataatcaagacg  
ctgtactgacgttggatgatgaagataacatcgttaatacaacaataatgatattggttgaaga

cgaggaagcgcgtgaaagattacgccaccaggacaaacaatcggttattgcagcccgtatcagt  
aaagtgtgtgagcggaaaaatccaaagaaaaaacgtcgtttagaagacctgaattgcaaagtg  
tggatgaacaattgatacgggaactggctgccattgcctactgacgagatctaagatthttaa  
tatattatgtgtcttgacagacctaataatcctgaggattaataataataacaacaactgttcaa  
aatgagagacgatacttttaaccaagaactgcggtgaaacttgtacgatggtatacagagtac  
gattgttgttgcctattggttaaccgctggagcgccttctaggatcgttcggaggaggcgtgg  
acgccacgtctgtgcaagccgaccggctctttatgaagaagataagaagggagataaatgcat  
accctttaggataacgtcccttattgagggtatacttttggaagggtcctaactaaaccgat  
ttagctgctgcagcttttgatgtatcagaaaagctgggtgtattgtagttgtaataacactcaag  
gcaatthttagatgtctcttcaatgaccatatggattgatggcaataatagtaaaaagtatgaagt  
tacatgcccgctcatgcactgtcgagaaaattagtggagggtgccgaatctattcacaagaaacc  
atgtctctcttgcccttcttaacaatctggtagagaaagaagccttcgcccgaagaattgaac  
tcaagaaattgtacctctccttactaacgggctcggcagccggaggaggaggatgtacaagga  
cagctcccaacaatcttcttcaacggctcttgacgtcgttgttgttccacacatctaaaaag  
gacaagactcgtttagaggctgaagttttagttagtaacaagataaaacacacatcaagattgc  
agcctagggtgcgtctgttccgatctgttatatgccctatgctccaccactaacaactctgcac  
ttacgcgtacaaggcaagaatttgtgtgttattgaagggtggggaatthttaaatac  
acaatcttgaagagaatggaccttcgactccaaaacagaccttcaatcattagttataacg  
agcctgttctgagacaaattcatcggcactggcgccttcttcttcttctttagaagacgacga  
tgattgttgtgatgatgatgacgatgatgatgatgaagacgaaaaaactaagaagaacaa  
ccaagaaacaaaccaagaacaaaaacaacaacatcaacacttccacctatcagcaaaacca  
atcacgacaacatgttgatgaatgtacttaaaaaaggagctgttaatggaaaacggaaaatgat  
ggattcttgtcaggaaaaaggccaacactctaaaaaattgaaaacctccgctgctgctgg  
gggtgtgcttcatccgacgttgttgcaggagaaaaatgaggaagagaacaaccctctcagtga  
gtcctactaacaatagggatagaaaagactatgtgcttccatgccctcaatagaagaagtcac  
tathtthtcaaacacaggatgaacaataacaagttggcagaaagtgtagtcaaacattctgtt  
gttattaatggaaattgtttaaacttgttgttactcaacacagaaaaaagtatatcctgcctc  
acgaaaatattctthtggccacctttagtccagcatgtaggatttaacaaatthtgcattth  
gactggcgttcttgcctthttagatagaattgaaattgtthtccgaccaatctgactctgtg  
gtgttgagtaataatgctgcccattcggctattctaaaggctattgtcatacataagagaaaact  
cattgaagcgaagtgtgaggactgcttcggtgaaaggaatcgatthtgtcgtgaaatcacagga  
cactaatataggcatacctthttagcaacaaggaaataagagaacggcaattatgctcagcttca  
accctgagtatgctagctggthtgggaaaatgatcaccgacccgggggtcattthtaccgtht  
caaggatgttgtactctthtggatcacgaggacaatcagatgtgggaataatgacactggacct  
cacgattthgatataaaaaatcacatctaaacgcataaggtgtggaagaaagactagctcaataca  
atactctacctatggattthtcaacgggcaatggaaaaggaaactaaataatagtagaaatatgaa  
agagtcaatattcacgggaatathtthttagacaccggttcggcaatcttcaagacaacatgtt  
aacggaggaggthttagctthtgcgttaattagatccccgctthtgaattctgctgtatthtcaa  
gcaagaactacatcatcaacaattgcccaccataaccaatctctaaggagaagtcaagctag  
agataagcaagtggataaaacaagagagaagatagtggtggattctthttagcactacttagtgct  
atagctgctcaagtaatgcacctcacagacggagagatgacgtacgtccccgatgggactgctg  
ttaatgttgtcatgtcagagaccaatgcttcgtccatctacttgatcataaacgacccccactgg  
ttcgggatggaaaattatgcctaacaatthtcaataaaacacttgaaatgagagacgggtgtaata  
gatagagtagaaacattagtgagthtgcgtgcaagtgctgcacatctcttgattaaaagg

gcatggatttagtggatatgcaaagaactataaggtctatggatttcctccctccagcttcttc  
tacttccaataaactcctagagtagcgataatgacatctggaagtagtactactacgggcatt  
ggatccttgtccattccttgcagaagatggatcaacacaccaccaaatcaagctatcggaatata  
ggactggattatccattactgaaaataatagagaggtgtcttttacggtagaaccttcaataga  
cggcgttcaagcagagcatcctctatccccttctattcttcagtggttacctcctctagttaaa  
aggccagaagtggtagcagcagcagcagcagcagcagtagtagaagaagaaaacggggacaataaac  
cttctgataaagataacgaagacaagtacagtgatactgatttttgggtctaagtccccgtcac  
acctctaattacaccaagaaatggagagcgtgcaaaaataaacgatcgggcaatgattagtagt  
tgaaaaataatctagtgaaactccacaaatatgattggacaaataaaaactacaaaggttgatt  
atthtgataagatggctgcctttgttgccctcatgacctttagaaaattccaagacatactagc  
ggataactatggtcctcctcaaacccttctcaggggaagtgaatacgcagtgacctatgtctaac  
gtggctacactctttactgacgtgtacggttttgaatcgaatggaaataagccattgtttgccc  
tagaacagctagaaaatgaaaccgggattgaaagcatatacgtcctaataatcataggaattc  
ccctgatggtaattctgtcagggctcgtcagactggaaaaggaaatgagtttctccttgaaggcg  
aagcagtagctttacagaaatggccatacctcctattaatgaaaaatgcaaatggacagataagg  
ccccgtcatctgtaaaggagtacaagtatthttgtgatctaacagcaccatttcaaagagacc  
tagaaaagataacaacgacggcggtgtggagcattctgcgttgacttatacacctaggtgcata  
taccacactgaacgttgttttagtccatctttactctgagccagaaaaataacagaacacgtat  
ctttcaacaaggatttgaacatattagaaattggaaaaaatattaccaaccaataccaacaaa  
ctacaaaagcatattcgaattgtggacgttcccataattgtcgcctctatgtcatcaacaaa  
acaatgactgtaaacactacataatthcaacaccttctgccacgaccaagtttgttcaggatc  
cgcaaaaacagggaaacaacttctggcagttgaagaggtcagaaactttaactcaaatctgt  
tcttgttctcctccttattthtagggacaataagcgcaacacaactctttgttcacaaataact  
gaacaaaattgcccgatcttctgaagggtggcggtttttcatgtccatcagagtcacttattc  
tcaagtactctaactctcttaaaaagcgcgactggaagaaattgccccagagactgagactag  
cattthgtcactagccatgtaacgtgtctcgatataatgacaatttaaacacctcttaataaag  
aggataattatcataatagaaaattaggtaaaatgggagtagagaagaatatcctggtcgggtgg  
tggtgggtggtgtatcattgttattgggtgtttgttacacttctaggaacagtaacagaaggagca  
ccggcagtcccacctthttcatcgtcttcttattcctttactcctgaatcgagtgttttctggg  
tcgaaggaaatcgtgtthtaagtggaaccaagaaggacaccttaatacagttctggggaagaa  
gattccttattatgctaattccatattcagacatgactgttctgaaactcgttctattcaatgg  
ccagaaacttcccctthgggcttgaaccttattthctgttcatgtgagtcagtaaacatcaac  
accgtactcatgaaacaacagaacctgacgatttattgtgggacggatcaagaaaaactaccac  
cataattctacctaataaaatgggtggtctgatgttgtgtggacatctthtatggagggataacgac  
cagaagtgtgggtgctgggcaggcattthgtttcttcttacttctacgcagaaagaagtccaag  
gggaatggcttgctgctcacactaacggaaagacatctgaggggtgataactaattcagcctacct  
thtcataagccttcaacgaactacactcaagcctatcatcactgacgtcacagaagataatatg  
atgatgggaagaatgtcaggcacacccatgaaccctaaggatatgacataatthgtcaacgatt  
thtcagacgatataggaagtactcctcagtgcttctgtatcgaattcggacatcctgaacaagag  
ggaagaatggatagctgtthgggtgttgacagactctaaagacctcctaactaaacatcaactg  
ggggagcgggaatatgggagcgaaggagaagaagaagaatcccgggtgttgaggaggaagaagaag  
agagagtggagaagaagaagaagttagaagttgcgctaccttaccttaagaaaagtggaaaact  
tatcggacctcgtagaagacctthgacaacaacaaccactactactactactactaat  
cctattgttagagaggttgtggaagattthgattacgagtcctthtaatagaaccagaaatctthg

gcagtaactcaaaacttcccttcattagatttcttgatcaaaaaaattggagacttggatcat  
gagcagagtttcttcttccatcgccaactttaaaattgaacaagagtcataaaaagccttattt  
tgtttggcagtcctgggttgggatgaacatacccctaaattcagacttagtgatggaagaact  
ggaagccttttacttctgcacctattattgtccagaatgtaggttattcctctgatgtttctg  
gcatgaaactcttagaagcaaaattggtgatcggcgaaggacctgatagaaacaaaagtgaca  
aagaaaattggggaagattgggctaataaaaaacaaactgtagttgctatgtttatttcaggta  
ttgtttgtataacagtaacagttatttctataatttcaattgtaatatattacaaaataaaaat  
gcctaaattctaatacaatgggttattcattccttattcctactactagtgtatagcacatgaa  
acaagaaagagacacgcttcccttgttccttaacaatatgtttgatacatttttcacaataa  
atgtgtcaactttatccattacttcattaccttctcctgatatacttttccaaatccaccacagt  
tccaacaccagtaaacatgctctttctgatataccaatggtgaataacttggcaaattcatgacct  
tgcatttcagtcagtgcaatgattatagcaccatacattttacattttttgaaatagaggatag  
tggcaaagttgggagagaatatctttgtgggaagaccttcttctcctcaaaagtacttttcag  
tgctcctccagttctctttacatgcaaagaaaattgtacccttttcattggatgaaactgtcca  
cagaacaggacatcttcagacattgaaaagtgagattggttagtaggtgaaattgtctttctg  
gtgcaaaaagactaatcgatcagatgggtgtttctgggttactttcaagaatacttttgtcctt  
aatggggaattcactaacaccagaagctgctgctatttttgacatgaaacattaacatacaatat  
acattagcttcgtctgacatacacagccatcccttttctgcatctacatggatattttctcctt  
tctcttgagctgtgcatgtggacgttacaatagaccatgtttcgatagaccacaagtttccgt  
aggacgacaaaattaccagtcctacgcaagttgtgctgcatactcttacatacaacatccatg  
tatttattaaccttattttgattagatgtgtcactaaactttttcaaaataccttcaatggtat  
ttgaaaactcatccgcgcttgttataggaagacgcaatttgacatctctttctccccgctcctt  
gcaatgggcaaaatctttagactcgtaacccagatttgggtacatgagtagaattgggtggtaat  
gattttggcgctacatactgattcaggcacggattgggagatggcaaaaaggcgaatgaagaat  
tcaaaacggttcaatttttcatacactaaaaatatataatggacataaaaattggaacacaattgt  
agccttggtatggggtgcaatatcaacaacaacatttcaatagtggactcctttgggtgcccta  
ttcacaaaaactgggtgtattttgatatagtctttcttgttcttttgtttctctcatattctt  
cacacaactttgaagagggctgttttacaataccactggctatagagtagtggtgattgaacg  
aacgatagcagtgatagctcaatcattttcttgttacataatttctcataatggttagccaca  
tctccattattaacaccaagaaaaagtcctcaatggttttaagttctgtttcttagcccagtt  
gctgaataaccttagcagtggtggccatccaagacgcattaaacgataaagattttcccgatct  
acttaggatgaattcttcagcggcagctaccacatctttagaagggtcataggcagaatacatt  
gttactcctccatctccattatagtcacatccattgcagcgggaagattctgccacctctctag  
agacactaactgtatcgtgggttaataaagtcgctcccattaaaatcagcaatgcctccaatagg  
catagtataagccttgtctttactcatggcgcatttaatggttacacaagttaccccgttcaaca  
gaatgattttgaataatgaacaagttttgaggattactattgcggggttacagcaacatacgc  
cctgggtagatgcaccagaaaggtcaacaatagtgctcttaaagaaagtggtgcccttggcaaga  
atatatcgtcatggcttgactagattcaaatggaagatattgaacgtatacattgttcccaaat  
cctccattcttgatatttggattaccgataatttgtcgtccttctttaatttcttaggcattttt  
gtcctagccgttccacgtacacaaatactgtcaattcaccattcttgtacattaaattagtaac  
cactccagtgctcttagtcacgaacctttcctgagtgccatggatcattctattagatgtagtg  
aaaatcacattttggccctgataaagagtaaatagatttagccctagttaccttcttttctcat  
ccaaaagaatcgtagttaatgccttaggagattcggctgcctcaaaattttcctgtctgtaaa  
cttgtcaaaaagtggtgtactgaggttttaatggcggttaattaattggttgcgggtacttgtga

gagatggttttctcgtggctaataatgtcagacagatccatattcaaaactacaaattttacttcca  
ctcttaatgcgggcacagaattttcaactgccgcagccgctgcaagtgaagtagaaggaggga  
tgaggaattggtattggttcttttagtttctttgatgatagaagtatccactaaattcgagact  
gcattctttaaaccgtggttttagtgagtggtgattgcacccatcatcttgtcagtttggaag  
aaattgcatcctttcttggttggttagagttggccatgaggcggtcacacatatccttagg  
ctgcccttggttctttgttataaactcttcaatcttctcctcctctcatttccctttgaaata  
ctagtcaccatttgcatggccaacactatagatttttcagagtatttaagtgagttattgtgcc  
tattgttaatggtggtattttcagtggtgagcagtttgaagcactctggaatctttaaactacc  
cttaacaccctccatcatttgaccattattgaaaacatcttcttctgtacataagaaattcg  
ttaaccattgaagggaagatggtatcaaaatattgcaactgggtcaaagttgtccatgaaaacac  
tccatttctggatgatctaccggccattcgcgtatctaccaagtcttgaaggttggcagtcac  
atcaacaatgaaataccgtacattaacgaataagcgtgcttaataatgtctattctctttaa  
gacgacatgatataatggtctcgaaagggcagaaagataggaagaatatgcaggaataacatac  
tcttccctacatctcctcctggtgatatgggcataagataataccctcaaccaatattcgtcacg  
gagaggcttatctgccccctgctcctcctcctcctcctactcctgtgcttggtggccattctgag  
ggcagtggaacaagcgtccagacagtgagattatcaagagaagggagtttccattatcaa  
atthaacctggtgcatctcactagtggtatacaaataccacacacgggctcgtaccaaatctga  
aggcttattttcagtgagccatttttccacacaacatgaaagtcaactaaatgacctacacga  
tctagagtagatgcgtcacgggtgcaatttatctggtatctcagttctataatcatttctccac  
tttcttcatcatcgtcatcacctccccaccactacttttcataccagaacctccacttccctcc  
gtcttccaaatccattgcttcttcttcatcgaaataacaatagtcctcgtcgtcctcataataa  
gctgctgctgcagctgtacgtgatgatgcactattattaccagtttcttcttcaagagaa  
tagatcttatattttcagatttcgctagtagttctttgtatggttaaagtttcttctctaaaa  
tgaagcaactgtacgcaaattatctttaaagtaattagcgataggagtttcatccacaaagtct  
tttccatctctaaagaaggcgttctcacacacgctgccacagcagacgcacggttatgtgcag  
aattgaaatggtactgcatctatacacttgggatcagaaccgtgcacatacttgacgttcaatat  
ctcttcatccattaaggaggtcagatgtgtatccttaaattctctctgataggctagaaacaata  
tacaatttttctcggccactgtaatcaatttctctcatggcttggccatcatgtcgaacacaa  
tactgcatacattttcagtgacttttctagatttgcattgctcattttcttgagttcagatat  
gtgagctagctctgaacatattccttcttctattagagcggaaagggggagagatttcatcata  
tccaaagaagacttcttgtctgatacagaagttgttccacttcttatctttctggttgcatcag  
aaatgctcttgacgctaaagagaatccattcaaagctcccgatgctctgtccttttcaagtgc  
atctcttccatcagtttcaaaaatgcttattgttaaagaaatcgatccttcttctcgtcatca  
aattcgtcacaatttcttctgcccgtggattgggcccgggaagaacttggtgccgtcacttcc  
ttttattagaagcattaccacagcttcaacttaatagcacttgagactaaattggtggtaac  
tgacttgacgttattactcttcaataaattgcttcatggcgtttattgacaatattccgcagg  
ttacttgggttgccaaaaaagtctctagagcaaaacattttcagtatctttataaaaacttcag  
tgtatagttttgattatcttcttggccaaaattatcttgttcgactgacccttggagaaggt  
actcttttcttcttcttcttctcgtctcagcttcatcgtcacttcttcttcttcttctcctcc  
tccccctcttcttcttcttcttcttctcctcctccttcttcttcttcttcttcttcttctt  
tcttcttcttcttcttcttcttcttcttcttcttcttcttcttcttcttcttcttcttctt  
ctttattttcttcttcttcttcttcttcttcttcttcttcttcttcttcttcttcttcttctt  
ccaagtagtataacaaacactcctccgaaaggtatatctggcctgtggttctgctatacgtaaaa  
cagcatcaataaacaccaattccctgcaactggccattgtatactcatcgataacaaggaacct



taaatttgccaacacttgtatcactttccatttttagtattatcggccacaaattggattttttct  
agagttatttcatctttcctaaataactggaatctcaaactcctttggtgagggtagaaaaca  
cactttctgggtacatcaaggaagaacctcctggtttcttgcatgcacacatgagactctcctt  
tgcagaattagatttgcacacaggagcatgtctgcagatccagaatcaatcaagccgtgggtcg  
ttaagaactgcaattagttccttgaccattgtagttttccagctccaggaagaccaccagat  
ggaacacagatattcctcctccagcataactgacagaaatcgagttgcacagatacctcactgc  
cagagactgttgcaaggaaacagtgctcaatacctttctggcctccttgacgatatctgggagc  
ttgaccgcagaagcagaggaggaggagaagaagaagaccagaaggggatgccgctgcagctg  
caactgcacttctgagcacctgggttctggtagccagaaaggggtatgatttgatggtgataac  
tggaactggatttgaattattggtggttcttcttttggtaactggctcctggccg  
ctggagcacggacgtttactccccatgatgcactctcgggtgaatgtcggacacgggggtaaaac  
caatcctttatactagttctacctccacgaggttgccagatggtacgatactttattacaaa  
aatggatcgtcctcttttgcttaagattttgtgtgtaacccttatcgttacgattggtacaata  
tgtcttatggcattttttatacatagcaattcctcatcttcttcaggcgccactgccgcccgta  
ccgttgcagcggcaggaggatattcttcatctgctttatgttggtacctacatagggctccttgg  
gcagtcagaattttttcagaagatatcgatttaccagaaaaacaaaagaaaaaggctgataag  
gaaaaggcatcaaaaaccgataacaataacaacaacaagcgtcaacgccccagacaagga  
agcagagcccgcgcgcagaaacaggactttaagaaggaagaggaaattatccaaaagaaaaat  
acacgtcaagagaaagaagactctaattaatcggcgcagctctcagaggaggaagaggattaaag  
cgagcatctagaggcaaaggactgcttagaggatttgaaaaaggacatttgattgtttttcc  
tccccttttagaaaggatgtttcttttaattatcatggtgattatattagccccattaatatt  
gttgggggtgaatttcttctgatacataaagaagaataactgggtctctggggccattagtaatg  
acactactattaactccacaaattctggaggagtaggaggattatgggataatgtttctgattc  
agagtcagggacgtttccatctaggggtacaatattccacatcaacgaaaaatttagtcaatata  
gccatggatggagattatgcgacattagtaaggaacggaatgtccacaaatcaaaggccatatg  
aaacctacaaagacgtggaggatagccagttctattttacattttttccacggttagaaattttaa  
acctttaaacggtgatgaaaataaagaccaccttgaaagggatgaaagttttggtgattgatcgaa  
tcacatattataatggaggggtttttatcatacaatatcaacaaccacaaatcccatttacaatt  
ctactgaaaagccgtatattaacacggagataacttccatcgtcagcaccactgggtacagatga  
aaggttcttctgcctcgagaaggaatacgtcgaagatggtgaagaaggagttacagaaaatagg  
tactttttacgccacatggcaagtaattatggtgtaaaggctagtttcaaatcagtcatgccca  
ctattgaaattagtgatctgactggcacatacaataaagaatagtgttaaaattaagcctgt  
aactgggtacttctataatttatgaaaaattacaaggaacaaaataaaaatacattttaaagtatt  
atgtttattgttttatttcttctaaaattttattttaggtatcctccttgaatatggaacgacgg  
gtgggggggttttttcttacccttctttgggtttttgggttagtttcttggccccaccatctgggtg  
tttttggctcctcctttcccctttccttttccaaaggcttcttgaatgcaccgcccactcctgg  
tattgatcccagcgcagaagcgatcgtgccggccagtgctgtgcccgccaggagagatgctaag  
agaggagccttgattattattacagcaataacaatgacaattattggtattaaaagtaaaccaa  
aaagtatatttttctcctcctcctaaagacgccaccaatggcgaagccatcttggctatcttatt  
gttattattggtattggtattatccccttccatgggtggtgacataataatagtggtgattat  
aacattaaaagaaacataataaattttggctcaaggcaccttcaaggctgtgaaaatattacatg  
cagataatggtgattctgaattcaggggtgtgatttttggtcgcacgtttactgacgtccaaca  
taggcataatggatagtaaaaattgtcctgaattcctcatcttcttctgtcctctgtaccatcctg  
gggttttgctgggaacaatgtcctatatgttcccttttttatatagtaattattcgggtttgaa

tacaagtagttatggaaatggagatgCGAACcactaaaagcttGTATATTTATCAAAAAATTCA  
AGTCAACTTTCTCGCACTCTTCTCATTGTTGGGTAATATCTCTCCCGTTAATGACGTAGATAATT  
GTTGCATTCAAAGCACTGATGTGCTTTTCATGATATTCGTTTAAACAATTTTATAATGATTTT  
TAAAGGGATAAAAAATTTGGTTACAAATAGTTAAAAATATGTAACCATGCAGTACAATAAAGGT  
GATCAACTGGTTTTTCATTTCTATATCGTAATGAAAATTTTGCATTACGCGTATTCTTTGTAAC  
TATATCGGAATATACTTCATCCATACAGCAGATGAACCTCTTTTTTCAGGCTTAATTGCGATA  
TCCTTTTCAGATTCATTTCTGTGGAAGATCTTTACAAAGCAAGATTTATCCGTTTGATTATTGA  
ACAAAAATCGAGCCGTTTTTTCCATTATCTACTTCAAATTTCAATTGTTAGAGAAAAATC  
CCTTTCCAGACTACAATATCTTGGGCCTTAGCCAGTGTCTGATTAGCCCGTGATTTATTTTT  
CCTCCCATAGAAGGAGATAAATTGTAGCTGGTTTCATACCTCCCTTGGTCAACATTTTACTC  
TAAAAATTGCCACTGTAATACTCATGTGAAGATTTTCAATCAATTGAGGAATTTCTTTCC  
TATATCAATTTCAACGCTAGCTGGCGTTTTTAGTACGTCCCATGCAAACGCATTGAGGCTCTTG  
TTCGGTACAAAAAAGTTAATGCCGATTTCCGGATCAGGGAAAACATCCGCGAGCCACCTCAGTTA  
CCAGGCCTAATGTTGTCTTCAGACATTTGGTAAAGTTGCTGCTGCTTTTTTCATTTATTAGTGC  
TCTAATTTTCCCTCTGTTGCCCTGCATTTTATTATTGAATACAGTCTCTCCGTAGGGTTAATA  
TGTCTCCATACAAATCTACCCAGCCATGGAAGCAGTTGCAGTATCTGACGACCTCGTGTCCA  
AACATTTGTCAACCTAGAGGAAATTTCCCATCTTTAAATAGTTCTGCAAGTCTCGCTCCAT  
TATTATTATTTTAAATGTGTACAATAAAAACAATTAATTTGAAACAAAAGGTAATAACAAAATA  
AAATACATAAGAAAGATTCAAAAGTTTTATTATTATCTTATCACACACATATTTTTTGACG  
GACAAGTACATTAACATTATCAACATTCAACAGACCCTACCATCATTATTACAACAACAGAA  
AATGGGGAAGTTTTGTTGCACAAGAACTTCCATACATCATTCTTCTTTACATGAATCAAGAAAG  
TATCCAATCATCCATTGCTCATCGAGCCTGTACCCCAACCATGGGTTTACAAATAGACTATT  
AAATTTATCCCATGAACAGTATTCCTGGAGAGAAATGAAGGGTCTTTCCCGTCCAGGTCAATT  
GGTCCAACATTTTCCACTACCTTACTTCCCCGAGTCCAATTAGATTGACTGTCTCTTTCTT  
TTGTCTCGATCGCACACTCGCCAATGGCAGCCAACAAGGAATCGGGAAGATCACTCCTCATT  
CTTTGGCGGTGAAGAAGGAGAAGTGACCTGAAGAGGCGCTGGTCTCTTATTATTATTTGTTGC  
AGTTTATTTCTTCCGCAATTGCAGTGTCTTGAGTTTCAAGAAATAGTCGATAATGTAATACT  
CTTCAACCTCTCCAGTTCTTCCATACATCACATCACCAGATGTCTCTGATGGCTTCTTCCACCAT  
AGCCAAAGAAGGTGCTCCACATTCAATCAATCCATCAGCAGTTTCTTCCCTCCTCTCCCAT  
GCGACGAGTTTGTTGGCGTACCTGCACCAGGGACATTTTCTGTTCTGCGGCTTGTCCGGACCA  
GAGTAGACATCATGTACTTGGATTTGCAGCAATCACATTCTACACATACAGCAACTGGAATATC  
AATATTGCCCTCATTCAATAGCTTGTAGAGAAGACAAGTCTTCCATACAAAATCCCCACAGCC  
TTCGCTGCAGCTGAAACAGCAATTTCAATTGTCTTTATCTGTTGGGGAAGATTGAGAGCTCCA  
TGATATCACTAGCCATCTCCTTACTTTGTCTATCAATTTTCTTGGCATTCAAAGATTGAGGGT  
TGTGGGTGATGCAGTTTTGGCAGGAGATCTCTGGTCAATTTATTGTCCAGTGATAGACCATT  
GGTTTGCCCATCCTGTAGTTTCCCTTGCATCTCAAGCACAATTTTTCATCATTATCATATCCA  
TCTTTAGAGATTTTACACCACATCTTTTGCATATATATTTCAAGTCTTCTCTGATAGGTCAAG  
TCGACGTACAGGGAACGTCTCATATTTCTCCCAATCTTTGAGTCGCCAGCCTTTGTCAAGATT  
CTCAGAGCCAAAAGTGTCTAGTTTATTGGTAAAGTTCTTGTCAACTCCAATCTTATTGGCCC  
ATGTAATTAAGCACCTCAAAAATACTACACCAGGAAAGATTATTCTCGATCTCTCCATCGGCAGT  
TCCTTCAAGAAATAGAGGGCAAAAATAATATCCAATCAGTCTCGGAAGTGTATTCTGTCTTTGG  
TAATACTTTGTGAATGCCATTTTTGCAATAGAGAGGATCATGTTTGAAGTGTGGAGGGTACTT  
CACAGGAGGCAGCCAAAGAGGCGGTGCACACACAGATTTGATTGCTGCATAACCTCCTTCTGG  
CAGACTCAGACGTACATACATAAAGTTCCAATTTTTGAATCACAGTCTCCAAGTGCATAAAC

atcatttctgccacatcttctcgtcctccaaatagatcgctggccaattcttctcgaagcactt  
ccttctggatcatctgatccacaaaagactgggatggcaaaatatctggtggagggtttttgacgt  
ctccaaaagcacatcttcaacatttctagtaatcttttagacatgataccaatttcttgatgaaa  
tcaaagcactgtccaaactcgaacctcttgtattcgtccagtgataataatcctcctcctgtat  
atgaattggagaaactaaatgactgggtggaagattttgccagcttcttccaaggcatcattggg  
cacatagaaccacataaacaatggaggattgttcaggtgtgagatctgtattgtaaatcacttgg  
agtgcacatagctagcagatttcatgtgctttccttcttttaggaaggcatattctgccttgt  
ttccgcattcagttcccagatcagaaaaggatggtagagaccctcagagcacactcctgcattatt  
gcctgtaacaaaggcataaataagcccaatttcatcaggcacagcactgcaagcgtacatcatt  
gattgttcttggatcatcattttgaagagtttttcagcaaacatcttggcccagtgtagcgag  
cacttgcgagacaacttgggtttttcttcttctgatcagatgtagcttcaacacttgccatcaa  
ttttgtacaacccttacaatcacagaggtttgtatgggtcaattccaaaatcgccaacgactgg  
aaacacgcgttcatgtgcagtgccagagtagagggcggcatttctcctcccctgtaattgactggg  
ccctttgagtcactacagccagtttgcgtgataccaccaccacgctagaagactggttgttgtt  
ttgctgctgtggattaaagggtttgcttagagcaacaaaaggcactatcatatgcacaattcaag  
aacacgctacgcttgtggttgttatatcttctcctcctcctgtacaactcttccaaaatctaaag  
gtgccatattttaaaccctagacttgaaagattcacgctgagcgtcgccatacttttcaaatcc  
tgcaggctctgatcttcttcaacttcaataaaaacattcaattcttcttgggttgatttccctc  
aagatggggaaggcactaaattgatcattcaggttcttgaagagggaaatagattgcctcataa  
taaagggtgcatattcttgcgcacattgcacgatcttctgtcaaaggattcaaaaagttgcca  
tctgttgttgcgtatccagaaaaattgatcacatcttcttggcacaattcactctgggttactg  
ccactacatctagagaaaattgaggatgcgtagccaacaatcattctcactagcgccttccctca  
tgtcaagaatagtcaagggtttttgtcccaagtcttcatgatgaattcttcttctggtgcagt  
ttccgaatcgtagcagttggcacataattttccagtgctactattggcaatacgcataatcctca  
tcggtgaacacaaaaatgaggatggggaatttttcatccctggtaatgccatgcattttcttga  
atgcaggaatcatgttgttaaacacgtacatcaggggaagaatgaagagcttcaactgccaccgcc  
gccgcctccgcacacttccggtcttgcgcataatgcttcacaaaatctcccccttcccactctgaa  
cagctctggtgcacgcacaacaggtccactttcaatggagtggttgtcgaatatcattgtagtaaa  
ctatagcattttgaaatgcctggagcaatcacattgagtgtagccatgatgccagaacaactatc  
agccacagccgatttcaacttcccattgaaccactaatatccatcaacgagatacttagacca  
gtagggttttgcagttggagatctgtatcagcagcagcagcttcttagtccatccatcttcta  
aaagttcaatcttggaggaagggtgcattttccatcaaagagttcaaaaagatgcagatttcac  
agtagaactagaactcttgcctcatgggtggaagaagcgttgaacgggatacggcccaacattgta  
gtatatctttatggtagaagttgatggtgacggtaggaaacgatctcgacaactgtatgctgag  
gtgcctccgcagggcgtttttatacccccttctcgtgtgacgtcaattgacgctcgtacgtataaa  
caggggtctatttttagagatgacatttttcaaaaacgtttatataatgggtgcaatttcttatta  
ctcaaaactagtcataatccggctaagacaggatgtttttttggccaatacgttttctggcgcaatc  
tgacattggcccagaccagcgggtccacccttccaacttgacatcaggccgaccagcgggtccac  
cccctaaactggagtgagctgaaaaatttttcaaaagtttttgagatgaagaagaggggtgaaaa  
gtgggtacgtactatacactcagaggggtggcagatcggccctgttccagaaatggctgtccaga  
aatctgggtcggacagattccagaaacgtttctaacatttctggaacagtcatttctggaaag  
ggttacaatttcttataactgggtgcattatttctagcatatattctagcccccttgtgcaatct  
gacattgggtcgaccagcgggtccacccttccaacttgacatcaggccgaccagcgggtccacc  
ccctaaactggagtgagctcaaaaaatttttgaaaagtttttgaaaacgaggatgaggggtgaaaa

cacctgttagaaagtgggtgctggtagcatccgttcactgctgttccagaaatggctgtc  
cagaaatcagattccagaaacgtctataaccatttctggaacagtcatttctggaagggttac  
aatttcttagatgtggtacaataacttaccatacatttctggtatcttcgtgcaatctgacatt  
gggccgaccagcgggtccacccttcgaacttgacatcaggccgaccagcgggtccaccctctaa  
actggagtgagctcaaaaaatttttcaaaagtttttgaatcgagtaagaggggtgaaaacaccct  
cttgaaaggcacgatctggatggtgctcgtccgttcactgctgttccagaaatggctgtccagaa  
atctgggtcggccagattccagaaacgtttctaaccatttctggaacagtcatttctggaaga  
gttacaatttcttagatttgggtacaataacttaccatacatttctggcaccttcgtgcaatctg  
acattgggtcgaccagcgggtccacccttcgaacttgacatcaggccgaccagcgggtccacc  
tctaaactggagtgagctcaaaaaatttttcaaaagtttttgaatcgagaaagaggggtgaaaac  
ctggtaggagaaggtacgcacgcatactggcggcacatgcctccagaaatggctgttccagaaa  
tctaggtcgaccagaatccagaaacgtttatagccgtttctggaacagccatttctggaagtg  
ttataatctcgcacatctgtacattaacttgattatggtatagtagcacctctctgcaatctga  
cactgggtcgaccagaggtccaccctcggaacttgacatcaggccgaccagcgggtccaccct  
ctaaactcgagcgcaccctaaaaaatttttcaaaagtttttgagacggaggaagaggggtgaaaac  
ccttgcaacagaggggggtataaaggagggtaccctcgcacaccttagacacacaacctcatcac  
cctccgtccaatcaacatcatcaccccatctctaataatccatcatgtatatcttcgtcgaag  
gttccccctcacaggggaagagttcatggatgtccaagttgatagatacaggatcatgtggaat  
gtctttcctcaattttcttcgtatgaacacttctgactactacaactggcctgccgaaatcggg  
acagaacatctccagttaggtttcagagaaaccagagtggtggatggaatggttgaaactgtcc  
taaagaccttctgactcgtggaagaaagagcaaggaaaagagagtttgaaggaatatctgga  
ctacaacggccaagtcatggagatctacatcgcagaatgggttgagacaaaggccactagccttc  
cacgtgtttacctatacagatgaagctgtcaagagtggatttctgaaacgaggaggatctagata  
tgatactgcaaccaagtggatggctgaaattattagagagaagaggggcaatattcaagaaat  
aaaagtgacccttagagtagtcttcaatggcaatggttgtagtgcatgtttcttaacactaag  
agaaacttgataactttggaacaaactataacaatggtgtacattgtgatttgttggtgcctt  
ttgcaaggcataggattgtacatttcttataaaaaataaaacaatatataaaattcagttgtat  
ttttattgctcaataagttactacaccaattctccccctctctagtgagagatcccaatca  
cttctactgtcactggtgctgctggttgggttcttcttcttcttcttcttcttcttcttcttcat  
cttcatcttcttttagttcgttcttcttattatgctttaaattatcctcaatacattttaaagtgt  
gctcttctcgggttaaacttctgattcttctcctcaccaccaacatcgaccctacgtccatcc  
tggtatactgtttcaccatcaccagaaaaatctaatagacggattttttatagaacgtacaa  
caatgtccactaatgattctgggtctggtgctaactgatcatcgccaataaaagataaaacaac  
tcagaaacacatggataatattgcacattgaattgatcatataaagtattgaagatgataggg  
taagatggtggcccgtaggcagacatgatcaaacggggcctgaaaccaccctcatctctcattg  
tacaataatttgaacacatgaatctgattcctcttctgtaccagaatataggggtgtgtcttc  
attgaatctgtttgtgaggaaaaagttcgtgcagataatgcaaacacgagacacgtacttttg  
tctcctattcttctatttctggttccatattcttcccttgcttcttctcctccttcttcttcttctt  
tggtgggttctctagttttcttctaggtatttctcctcttgccggcgtcaagggtatacctcgtt  
tggtatattggatgaccttattacgttcatgcttaccgtccattttttcggccgaatgtgtaaca  
actgcattcaaaaataatgccatgcattgatagctctttagaatgtctcggaaatgtcatatttc  
tttggtgctgtagtacacaaaatgtggcacttttcaagccaccacctctacatcccagtgaggcgg  
tgagggtggacgtcatatttaactggaatatgtgtaataatatagttccaattcttaaaaaatca  
atagaccaataaaacaacaaaaaacattttgtaattttatttcaactaaaatctcatcaaat

aatcttctcagcaataaacttacatttcatatcacagtgtacaatactattcgtgcatttacca  
acacggtacacgtaattcttactcgtcgcgagaaacatgaactacaaatattccctttgtacacat  
ttctggggataaacttcaatctttacaaacaacgctctctcctccttgagaacgtcaataacca  
gttatgtgcatcattcaattcttgaataattggttccattttcttgacatcttcttccctgtaa  
accatcacatggaaaactggcttgtatgtgaccactcggcgacacatgctttgaattcttctc  
catacatctccaaataactccctcaatccaatttttgattctggaaaactgttctgtgtcgtgcct  
ccacatgcctgtgaaaaagttcaatgatgatccaaacattccatccacgagcctgggacgttcc  
tggaatcggatgcacgcaaagctcttgaatggtccatgggaagatgggtaaatagtcctat  
aattggtgtacatgaagttgaggaaagactgtttgccctttccggcagttctcatgttatccac  
ccatgaagttttccagttaggggagatccttcgacgaatacaatcatgttgaagggttaagact  
tgtctaactctctcgcgagcagctctctctcttttatagaggcaaaaatgtagttgccagccacc  
accttaaaattcgtgcattaataatataatatttttatattttgtatcattcaaccgtagtcca  
tctaagagtcaacatgtcctcctcctcgtcgtcgtcgttctcgttccgcacatctccacctaccag  
acctttctcaaggctctggctcaccagatctggtggacaagattaccagaaatgtgacgaga  
caggaagaaaccagaagtgcacctccagtttctggccgacatctcgcacctgatccaaggaga  
aagaaatggaggaaatctgttccctttgcacccgttcaagaaccaaccacatctggaaccaaga  
atagtggaagtcttcacggggagaacattggacaatgacattgaagaatcatactgttattttg  
tcaaggatctgtataatggagtattttccctatgtgaacggcgtcaaggagttacagggcgttct  
ggacaagaaaatatctggatctggatctggagaatcctcctctcttagagctcccctgatccca  
ataactgatgtgatttgctgtacattttcggacttttggtagttcttccccccagatctaaag  
cgtaccgagtcactgaagctgttctagcactccccttcaatgaattcagtaacaactggcc  
tcctacaaatatcaaaggagcatacgtgtctagagatttcaggatgtttaatctgttgccgggt  
ttagatcatatagaaggagaagtggggggagaaagtgaatgggaatccatacacgcacatctgtcg  
tcaagcgaatggtcaccattatgcgcaacaaagctgagaagaaacctccatcaacatctagaat  
ttttagagtgtatgtggctgaaccagttaatgatgcagtgacaaagatccctatacgtgtactc  
agtaaattattcggttcaagactcgcgggtattctccagaaagtgtactcttattcaatgctaa  
atcttccatatctcctgtcttcaaattctatagacatcaagcaaggagtaaaaggaattacatt  
atctataccatctgcaagaaaattgggattctatttactccaaaaggatacaacattacaatct  
tcctatcacaagatggtgcccactgcatagtttcaatcaacgctgggtattattgggtgatgatt  
tctctgaaaaatacgcacagtgcattgaggagaaaaacaagccagaaaactgttgtatgtgctt  
ttgtgaaattgacaagacgccccgatttttcttatagtgaacatgtggcaaggcacaatttcttc  
ccgtccacgcattctcctcatcacatgatgacaagtggtgtggagcaaagatttggtccgaat  
gtatattcccgtacatcatttccctgtatgagaaaatgactgggtgtggcagggtgtaaaagttgt  
agatttggtccagtgccctgggtgtaaaagtggcatgctcaatctaaagggagatgttacgag  
ttttcaaatttggtgtaagagaatgatactaccatacacatcgactcattgttcttctctctttg  
atgctaccataaatcgcgcagaggcttggttttactccctagagtttctccagtatgattttga  
aactgcgaggagaattgcgcatggagctaaagacattccccatgtttacaataaggtagtaaaag  
aatgtaaaagatttgatagactgtgtgccttgtactgttacaatgcgtatctcctgtcgtat  
gtgatgagccgaatgaaagtacggactatgaaatgggtggatgtaactccccctctaattaatct  
taccgagattggtgattcgggaagagtatgatgatgggtcccggaaatcatatgtggccagcaaaa  
tttacctgtaactttattgcggggttccagtgagaaacaccaccattagtagctgcagagatg  
ctgtaacttttctaggaagagcaccggaggaagaaaatggcaggatgggatgatcaatcggcagt  
ggggcaagccattatagcgttagccaactggagaaagagtgggggaattgccccaaaaatagttt  
gatttactagaaggggtaaatgccgtactttatagaggcgacagtttcttgttacgtgcgataa

actaccctgtggtattggtagatccatgagccctagtctggaactcgttaaaagaaaggtgaa  
taaaattgctttaataaaggccttctccacgagaaaaggggtgcgtccagacgcacataaaaag  
ttacttgaatgggcagaactattagtcaaaagttatctcatggaagttttacttcagacgccag  
aatgtgtcatacaccgcgcccattcatttgttaggcaaaaactctcctcattactgacgaattggt  
tcacatgcggtccagatgatgccacaagaaacgcctatatccagaacctaaatgcgccagacag  
aatgcggtgctgcagcctcattttctgggtcgctcccaaacctgaatttgcctcctgcaaag  
aaaggacgattgaatggatgtatgaaaaggacaatgatgatgtagagttgtaaattgtccttc  
atgtaaaaaggctatccagaaatattggaggttgtgtgaatgtgttttgtgaatgtggaacaac  
atgtgctggatatgtgaagagaaggtttctcctgctgattcctaatcattgtgtggagaaacaca  
ggattgtttatagtaactgtgttagggttaaataatgccttagaaagtatgtacgggttgagat  
ttgtaccatgaaaaatgtagaagaaggagttaaaaattattatgtaatggagaatggatttttc  
tttgatgtacaagaaatgggttgctaagaaataataaaaacacttgtgaaatgttataacttgtt  
tattgtccattatattcaacaaactttaatttctttgcatgccttgttcaaaagggcaacataa  
tcgccttctttctcctccttcttcttcttcttcttcttcttcttcttcttcttcttcttctt  
ccccacgctcctcgttgtagcttcaattgccttaactgtgttgaaaatcatgacgacgctctcg  
gacgacgcttcttctcctcctctggtaattgttcttcttcttcttcttcttcttcttcttctt  
ttagaagaggggtcaatcacttttatttctacaccatcttgatataacttttccattatccatga  
agattttgatgtctgatccagtaacctctctgaccatctccatcaacaacctttcattcggagg  
atcgatgaatgatatttccattacctttccggatgcaatgaaatgggtattaaaatgggttctg  
atactatctctgatgcataataggtgcacatctgagccagttatggacatgaccaatctgggcctac  
gttcatccacgtccctcttctgtagtcggtccgaagagacgtatctgattccttcttctgtggc  
agagtaaaaggaacctttccattgggtctgcacaacaaggagaaatctcggtcagaaaaggca  
aagaccagacaggcaccgctcatatctggatgatgcaattgaggactttttatgcacatctc  
gaagagaaatcctttgttcttctgaggcagcatatagctttttggattctttaagttttctc  
cagaacacttcttctcgtactagaaggttgacttcaatttttgcaaatctgatttcttctc  
aaattatctaatttttgattactcttcttagcgtgtatacaactgcagcattgaaaaggcatg  
acatgtaatttccaatgcttttagctgacgggtgtgtgctgttgtagaaaagtaatccaagttt  
atccattgggtacaattaggcacatatttgaaaaactgccaaactatggggtttgcgatacttaag  
ccattgtacgttaacctatcacagatatcatacactgatacacgagaagaggtaccaccgtgtt  
gcactaacacttgttccatattcttaagagtacgggtacaatttctaggagaaaaccacacc  
tactaagaagtctgttgtgattatcatataatcacatttcttaacggccgatttgaaagacgt  
tcatgtatgattctgtataggggtgaaaatttaagttcttgtcattaactagagcctttctt  
ccacaattttgttcaattcctggaatgggcttggtagtgattcgttccattttttccataatt  
agggtcttcatcttctaagaaactacctgttttgggagactggatgtgtattttagtccaatc  
tgaagcgtaggatctcctgttaattgtctcaatcttctgcttaccgttcttgatgtggagtact  
cctgtctctaagacgaactataaaatgtccttctttagctcacttctcctgacactcttgac  
tgatttgaatgttaatagtagtaccgttccataatttctgggtattttccccagacaaacaatacca  
tttttacttttaattgtttaaagtcttccatttttataccgtgtaaccctaacaatgggtgtgc  
cagtataataaatctacggaccatgctcttgatctgggaagtgtactcgtgatttctgtagaaa  
ttgctatttctcattcattatctcattacaggaagatgataaaatgaagacgtgcatgag  
atatgtgtttttcaatatcgtatatcaaatgggcaaattacataatttttagcgtcaacac  
tcatcttcatgcaagactttttggagtgaattactaaaaaaggctatatttcatgtacaacat  
aaaacacatgtgcagacattaaattgggttctcaccctcccaacatcgttttcatcaactctt  
tcctcacctctatataaaaccagcctgcacccctcggaaccacagtcgacttgtaccctccg

tcgagatgacatctccagctccatcacccctcttccacccccaaatccagttgtaccactattgt  
aaaccgatgtggtttccctccttgacaacaacaaggaagtgggtcatctacgacaccaattccaaa  
ttcaagtgtgaacccaaaaatctggaactaattgggtgacttttctggagtctctgataatggtg  
ttaccagatatccccgaccagatatttgtgggaacatatatgggtcaaataactggtctaa  
atctgggtcatgaacgcttcagtgacatgagtaacaactgtctggacaatattacacgccttca  
gaagtgattgaaagtgtgataaagaaaacgtccagcgcactttaaaatgaagtacacacgttcct  
tgatggaccacaccgagaaataactatTTTTCTGGTGACCAAAAATTGAGCAAAATTAGTAGTTG  
GTGTACAACCCCTATAACGACAGTGGGTATGCAACTCCGTCTAGAAAACTTTGTCAAGGAAGAA  
CATGAAACTGTCGTGGTGCACAACCCTTCTGGAATGACTGGATTCAACATATTTAATAGTTCCC  
CCGTGTATTTGAAGTGCACAATGAGATGGACGCCCTAATTTTTATGGCGGCTTCTTGAAGCA  
CAATAGTTTATGGGGAGAAATTAACGCCAATATGGACTTGTACACGTTTGATTATGCGGGTGCT  
TTTTCTGGACGAAAGATGGTGCCACCACGAGAAGAGTTTTTCTGTCGTCCGAGCACAACCTTATCA  
ACTCGTATTACAAGTGCAGGAGAAAAATCATGCAAGCCCTGGACAATAACTACAACAACAAGAA  
TAAGAAGAGGAAGAATGTTGGTGGAGCACCTGCGTTCACATTTATGAGCGGGGACGGAGAGGGA  
GGAAAGGAAGCCCTAGAAGCTAGTTTCGATGTGATTGGGGGAACAAGAGGAGGAAGATTTGGTG  
TTGATTCAACACCATGCCCCATTCTTCAGCCATGCAACTAAAACCTGGACAATGAAGGAACTA  
TGGATGTATTGCCTGCTTCGCATCAATGTTCTTTGTATTGGAGAACCAGGTGATGAATCTTCC  
TTCATATCAACGGATGCCTCTAAAATTGGACAAGCGCAAGCATGGATAGATGAACGACTACGAA  
ACAATGAAAATGGAGGAGAAGAAAATAATGTCTTTAAAAGACCTTCCATATGCTGGCTGATAT  
TACCCAAAAGGCTCATGAAACTGCCTATTCCAATACCATCCCCTTGGACCCAATGGCAGGCAG  
TGGAATTGGCCTACTCACACTGTGGAACCTATTGCCCATGAATTTGTTACCCATTCTCTAGTAA  
ACACATTGAAAAATCTAGGGGATAGAAAACCTCCCCGATTCAATTTTGATATCTTGTACAACCT  
GCTTAATCCATTTGGAAAAATGTTGCTAGTGTATTCAAAAATTGTCACATTTTAACTGGACAT  
AAAAACAATGAAAATGTGGTGCCTCGAGGTTCTGCTTCTGGGAAGTGGTGGACTATTAATTTTG  
TGGGTGTGAACATGTGGACTTTTCAAGTAACAAAATGTAAAGTTGAAAAGGATAGAAAATATC  
CGATTTGGCCTGTATGGAAACTCTCCCTCGTCTACCTAATCCAGGAAGCACTACCGTCTGATGAC  
AGAATAGTTTTTAAGGGATTCTGTAGAGGGGAAAATCTAGGGAGTGTAGGTGAAGTCGTATCCG  
ACATTACACAGAGTGTCAAGAATTTTTGTCTCATGGTTGAAAATAGGAAATTTAGTGTGGATAA  
AGAAACTGGTTTCTCTCTTCAGAATCGATAGTGTCTGATCCCTTCTTTTCACTAGAAGTGACT  
GGCTGTAGATCTAATCGTGCCCAAGATACTATTAATAATGGCCGAGTTAGTGCTCGTGTAAATGA  
GGATCCTAAAGTCAAGTGAAGGTGCTCGTGTATGGTTGGCCAAGGATGAAAATGCCATCATCTT  
TGAAAACGTTAACCACGATACGGCCATCTCTACGGACGCTATGGAGCGAGCTATAGGGCAGCAC  
AAGATACTGTACTATGATATTGAAACAACAGATAAAGATTTCCCGACAAAAAATCAGTCATCA  
CATCTATTGGGTTCTGTTTGTGTACGGGAGGCGATATGACACATGGAGGAGAGAGAGGAGTATT  
TGGACTGGTTGCACCTGGATCCGACGTGGAAAAGGTGAAAGAGACTATAATAAATTCGTACGAT  
CCTGAAGAAAAGGAAGACATTATGAAACAGTGCCTCAAGTGATTGAAATTTTACCAACGAGT  
TTGAAATGTTGCTTGGTTTTGGAAAGTATATAGATAAAGTGAAGCCTCACGTGATTAGTGGGTG  
GAACAATGTAGCTTTTGACGACCCCTTTGTCTTACTCGTATCGTCAACATTTGAGTGATCAC  
ACCAAAGACATGTCTTATTGTGTAGCAGATGCATCTACAGCAGAATCTGTCTCTTCTAGAGCAA  
CAGAAGGAGGAGGAGGAGAAAACCCATATAGATTGAGCACCCCTCAAGAAAGAATACAACCTAGC  
AAGCACTGGTATTTTCAATAAATTGGGAAAATTTGTAGACAAGAAAACCTGGCATGTTGAAACCT  
GAAATGACTGCAGATTTATTGGCCGGGGCAGAAAGTCAGGCCAATACCAAGTTAAGGAACGCA  
ACAAGTTATCCTCCAGTAATAAAGGATCAGCAGGATGGTTCCAGAAAATTATTGGCGGTATGTG  
CAGTGCTATTCGGTTGGATCTCATGAAAGTGTGCGAAAAGGCCTATAAGAATCCCTCTCTGAA

tttaatttgaacgccgtgctcgccaaagtgagtagtgctcggcgacaagggttaaaaatgtaaaag  
atgaagtagacctacactttcatctattgggattccttgaagctgaagaaggcccaggatcaggc  
aaaagtacacgtctattgttgcaaggatgcctacttgactgggtatagtttctacctccatcaac  
aaggaaggggagatTTTTtaggctgtgtatggactctgctttaaccgaggcggctcgtgacagcca  
acctggccactcctctatgtataggagaaggagcaatctgtagaatatgggagaagaaagggc  
agatagaagaggtgtgggagtaagaagacactctattgccacagacacaaagggaggtatggtg  
agtcaacctatcgtcaatcatgttccctatcaaacgattgacatgacaagtttgtacccgatga  
ccatgtgtcagaataatctgtgcaccactacctttgtgacccatcgacaaattatgcaactgag  
ggatagattgggtacttgaaaaaatgaaaaacaaaaccaccgactctttattgttgttgacggtt  
attgacgagtgcaatcagattgtgttgcgagtacagacccattgatattgcagtcgcatcat  
ggaagaatagcaactctaatagacaaaactccaattactcgcatagaggaaagtttgggtctaag  
attcatagaaaatttggatgccgagaagacaaataataaaaacgtgggtgcaccaatacatctccc  
aatatgaatgtcactgccgcaggtatggattacttccccgagattgtgtgtgacattaatatgc  
agtttgcggccaaggtgaatgatgatatgcatatagcccagcaagtttagagtatatgcttca  
agtattgccataatgttaatcgacagaccgtacattggcgcacacataacagctggaaaatgt  
cgtacattggaggatattctctcagaactcgaaaaggacttttctgttgaaaaagatgaggaaa  
ttataagaaccattggacatttaagggcaaaaacaatacagatttctgtcatagtcctgtgac  
ccaaatggctcgtcacattattgaatctacgggaagaaatatccgtgattatgaaggcaatgaa  
aaattcgagaggttgggttagcttatcagacagaatttatcgccgcgttggcgcatttgattcgg  
ccaatgatccagctgtagactgtgggtcttctcgtctaataatcaatggttggaaatggtggttaggac  
atggaacgtaaaaactgacattcttaagggaaatcatccctcaaatgcaagccacttacagagcc  
gatcgagttgtgatgcagaacaaggccaaggagtttgccaagatgggagacatgaaaagagctg  
gtctaaacaaagttggacaaaatattatgaagctcggatgaattccatgtatggtcatttggc  
cctaagagcacgttcgagccgtaaaagagtttgctctggatctgccaatactgcctcaagtatt  
tccaacatgtcagccaccggaggaattggaggaggcacaaggcactcggtgacggccaatcaga  
ttacagaaaatgctcgatgtgtatTTTggcaatattgggtgtggattacagatggctcttccctgg  
tactaagcagacgtacggggatacagattctgtattctgcgtgcataatattgtaggatgatgga  
ggaaatgataccagaatatgatgaacaaactggcaaatattattatgtgatggatattgctctaa  
aaaataaaatggctgcaattattcccatcctagtcaactcgtaacaaagggcatccagtttgt  
agagcgcgagacgctgggtgtgggcatgatgaatatcgccatgaacgtctagctgtcgtcgtgt  
cttttgtttgccagaaaacataccatatgcttcactttaatgaaaatagtgcagcgttcaatg  
acatgataaaattgaaatcaaccgataacaataataagtttgcatcctttatcaagagacctag  
ccacgcagatgggtatgttgttccccataatccttcattgattcttagagcggccgaaggacc  
gctggtaagaaattgaaaagctttttggaagaggaaggaattcatgacgagaagagatggagg  
aatggtttacctcttcacctacgtggatggccatggatgcttctgttatcaacaacttgatgc  
ctcaciaaattgtaggggtggagaagggtaactggattgacgccatgacttcccgcccatagaa  
gcggttacagaaatgatggaggcggtgacgcaagcgaatgcagctttcacccttacaaaaagg  
gagcctttgtgaagaaggggaattaccccaccaccaaactaaagggctccaatcattgattgc  
aagatttttaccaaaaatagaggaaaagaaaagctgttatttggatgtgatgaagaatcatgtg  
gagaattttgcatcccatataacaaatcctgctatgatgattactagttcccagatcaacaagt  
ttgatacgtcaaaagaacagagtagacctaatcctctagctctagcgataaataaccacctgaa  
cccttcttcagaaatttcattggggcagaaatttaagacgggtgacatcagtttcttcttgag  
ctttcggcagaggaaggggaagtcctgctgggtatttttaacgctggtagcgtgcgttgggatg  
ccaccaacatgaaggggaagtgttccctgcattttcagtcagaatttatctgttgtgcccaacgc



catcacatctgtatacaagatggttgagagcgataagacggcaataaaaatccatgattgctaaa  
aatgtagaagtgttggttctacatctgccaaactggattttctctgagaagaggagcattgt  
catttaatacaggcgtcattggttacaaggacgtggctatggcttgatacgcctctaaataa  
taaacaaatgttattggttggagggggaaaggattacgggtgaagacgacgacgacgacgac  
gaagaagcagaagaaggacgaagaaaatggtgaaaacgaagagaacaaagggtgactgtgtca  
cggaaaaaagatccctggacgaagcactaacaaggatggttggtgaagaaactaaaacaagcga  
gaaaacggaggggagaaagaaagggtcctaagacggcaaagggaagacggaggaaattgctagt  
tcgttgagtaaatgtgggaagaaagatgagagagatgctattcttgaccgtttactaaaagcaa  
cacattcttcttgaccacaacaatgaagagagaaccagagtcttacaacaatatagcaattgtac  
attatcttctatataacttcagtcatgaaattggaccaaaagagtagcagaccaaatggaaaat  
ttaatatctcaattggatcaaatacgtaatctctccaacaagaaggcaagaaaaggaggggc  
cttttaagtctgaattggacgccatgggtgctgcagtttaaggtaagtttttcccagttttaga  
tgctctagaaaattgactcaagaccattggaaaaagtgccccgtgtccatcccagaaacgcgt  
gaagaaaaaccattaatgggtgtgccttttgaaagttgactcaattctctaataaggaaaacaca  
agtgcacagatacatgagacatggcttgttgcaatcattgtattttgtcctcttgtagacgct  
agctttaaaatttgagaacgaaagattggcccggcaaattggcctagatgactctgtagatttg  
atggctgagatggtgttcggaggggataaactattggcccaggaagtgttaaaaagggtaaaag  
atgctcaagatagaaagttgggtgaaatctttattgcctttaaattataacatgacacaaatac  
aattatatttttgtttgagtctttaaggtttgctcagaaacctgtagctgggtatgagtgtagt  
gaaataaaagacgctgtagaggtctggccttttctaccactacaggtactgtgtggaattata  
ctgatgaaagatttttggaccattgtataacatggatgaactttgtaacgaacgtgtcaatgg  
aaattgtaaattgtcctttataactgggtatttatcatacggcagcagtagaattggctgctgca  
tgtctatcttggtgttttgtaagaaatgataataaaaaacatgtataatttcattctggttttta  
ttttatctcctcaagagttgtagtagtagcagcagcagcagcaatagcagcattattttcagcg  
acagcttcttcatttctattgattgatatctggctattttctacagcccattggctgcttaagga  
atattcttgaagcagaaacacatacccagcaatgattgcaatgatcaatattaatagtagcga  
attaatataaataagcattttgtccacattctggctaaaataaaaaagtttatctctcaatgaa  
aaatttttattgaccaatcacttcgggaagttttgcagcatgacacactattactccaaaacta  
tgctcactcgtatctagtcccacaacatcacgcgtcatatttaaaacatgcacctttaagcct  
gttttttcttatacaattctgtattgattatagggtttacaaccttttaggccttctttagaga  
tactattttcatgtattttacaatcgaatatgagttgtcttggtgcaccagacgggagcctgtca  
tgaaactctacttctctcccacgtgtattgagcagagatcattaagcacaacttctgaagaaa  
cgagaggttgtaaaatagagttataattagggttaattaggaaacatttgtggaacttgaact  
gttaatatcaatagaaactgagctatatgctgacgacatggccttgcaattttcaaatcatgttca  
aatcttactacataacccaagaaattataatctgcttcttccatcatcttcttccatggcat  
cctctcctcttggctcttttagtacaatttcttttgggttggttagtcatgttgatagttcat  
tgagctatgatttcccacaacatcatcaaagaaaacccttctgggataatgcatgcaccgaca  
gaggtgtagaataatcctccatatctaatacaccgactgcggtagcgttcttctcatcatagt  
aaccgagcttgattttcacatgactcatgggtccgatagagatattggaagccgggttcagtagc  
ggaaaaaatagacacttggttgaacattttgtcgtcaggaagagctctgaataaaaataccgaca  
ggggaattatcttcaacactattaagtttggtgcataagatagccgccctgaactacttgat  
tataaattgttatatcgatgctatttcagaacaaagatctcctataaaaattgtgattagggca  
gaccaacatcccgtctccagtgtaagacgatacatgaagtcctgggtccagttggcacgaaaatg  
gcagccgttcgtgaaggattttctcacgtcaactcgtctcaccttactggtacttttccaaatc

gtcgtggatctacattgaaactaaaatctctttcgtggggatcacttccatccttttaagagaa  
gagaggcactctgtaaacaggagaccaatctgaatagtagccttaaagctgttctatTTTTTct  
tctagagtgggtaccgctctgcggtgcattcggtacacctccaaatccgTTTTcctttacttgaa  
tcgattttgctccttcattttcccagagcgcacatcagaatcgtacctgTcgtcgaacgaatcttc  
acctcccattttatTTTatTTTcctctatatgataaaaaccacacctaAAAtgtctaataTTTta  
ctacactgaaaa

**Table S2.** Composition of LAMP primer evaluation reactions, Cas sgRNA evaluation reactions, one-pot SHERLOCK reactions, 10X LAMP primer mix, and sample dilutions used in one-pot SHERLOCK reactions.

a) Composition of LAMP primer evaluation reactions.

| LAMP Reaction component                   | Initial Concentration | Final Concentration   | WSSV reaction volume (μL) | TSV reaction volume (μL) |
|-------------------------------------------|-----------------------|-----------------------|---------------------------|--------------------------|
| Isothermal Amp Buffer (NEB)               | 10x                   | 1x                    | 2                         | 2                        |
| MgSO4 (NEB)                               | 100 mM                | 8 mM                  | 1.6                       | 1.6                      |
| glycine                                   | 2 M                   | 200 mM                | 2                         |                          |
| taurine                                   | 500 mM                | 50 mM                 |                           | 2                        |
| water                                     |                       |                       | 4.3                       | 5.8                      |
| dNTPs (NEB)                               | 10 mM                 | 1.4 mM                | 2.8                       | 2.8                      |
| WarmStart RTx Reverse Transcriptase (NEB) | 15000 units/mL        | 300 units/mL          |                           | 0.4                      |
| WarmStart Bst 2.0 (NEB)                   | 8000 units/mL         | 320 units/mL          | 0.8                       | 0.8                      |
| Primer mix                                | 10x                   | 1x                    | 2                         | 2                        |
| Template                                  |                       |                       | 4                         | 2                        |
| SYTO-82 LAMP dye (Thermo)                 | 100 μM                | 0.5 μM (1 μM for TSV) | 0.1                       | 0.2                      |
| 5' FAM-polyT(5) reporter (IDT)            | 100 μM                | 2 μM                  | 0.4                       | 0.4                      |
| <b>Total</b>                              |                       |                       | 20                        | 20                       |

b) Composition of Cas sgRNA evaluation reactions.

| Cas/gRNA evaluation reaction component | Initial Concentration                       | Final Concentration     | WSSV reaction volume ( $\mu\text{L}$ ) | TSV reaction volume ( $\mu\text{L}$ ) |
|----------------------------------------|---------------------------------------------|-------------------------|----------------------------------------|---------------------------------------|
| NE Buffer 2.1 (NEB)                    | 10x                                         | 1x                      | 1                                      | 0                                     |
| Isothermal Amp Buffer (NEB)            | 10x                                         | 1x                      | 0                                      | 2                                     |
| MgSO <sub>4</sub> (NEB)                | 100 mM                                      | 8 mM                    | 0                                      | 1.6                                   |
| Cas12b (GenScript)                     | 8.73 $\mu\text{M}$                          | 200 nM (250 nM for TSV) | 0.229                                  | 0.570                                 |
| sgRNA                                  | 5 $\mu\text{M}$ (2.5 $\mu\text{M}$ for TSV) | 400 nM (250 nM for TSV) | 0.8                                    | 2                                     |
| water                                  |                                             |                         | 4.571                                  | 7.83                                  |
| Template                               |                                             |                         | 3                                      | 5                                     |
| 5' HEX-polyT(20) reporter (IDT)        | 5 $\mu\text{M}$                             | 200 nM                  | 0.4                                    | 0                                     |
| 5' FAM-polyT(5) reporter (IDT)         | 50 $\mu\text{M}$                            | 2.5 $\mu\text{M}$       | 0                                      | 1                                     |
| <b>Total</b>                           |                                             |                         | 10                                     | 20                                    |

c) Composition of one-pot SHERLOCK reactions.

| One-Pot SHERLOCK Reaction component                            | Initial Concentration | Final Concentration     | WSSV reaction volume ( $\mu\text{L}$ ) | TSV reaction volume ( $\mu\text{L}$ ) |
|----------------------------------------------------------------|-----------------------|-------------------------|----------------------------------------|---------------------------------------|
| Isothermal Amp Buffer                                          | 10x                   | 1x                      | 2                                      | 2                                     |
| MgSO <sub>4</sub>                                              | 100 mM                | 8 mM                    | 1.6                                    | 1.6                                   |
| glycine                                                        | 2 M                   | 200 mM                  | 2                                      |                                       |
| taurine                                                        | 500 mM                | 50 mM                   |                                        | 2                                     |
| Cas12b                                                         | 8.73 $\mu\text{M}$    | 200 nM (150 nM for TSV) | 0.458                                  | 0.344                                 |
| sgRNA                                                          | 10 $\mu\text{M}$      | 200 nM (600 nM for TSV) | 0.4                                    | 1.2                                   |
| water                                                          |                       |                         | 3.44                                   | 2.46                                  |
| dNTPs                                                          | 10 mM                 | 1.4 mM                  | 2.8                                    | 2.8                                   |
| <b>Incubate for 15 minutes at room temperature then add...</b> |                       |                         |                                        |                                       |
| WarmStart RTx Reverse Transcriptase                            | 15000 units/mL        | 150 units/mL            |                                        | 0.2                                   |
| WarmStart Bst 2.0                                              | 8000 units/mL         | 320 units/mL            | 0.8                                    | 0.8                                   |
| Primer mix                                                     | 10x (20x for TSV)     | 1x                      | 2                                      | 1                                     |

|                          |             |                                 |     |     |
|--------------------------|-------------|---------------------------------|-----|-----|
| DNA/RNA                  |             |                                 | 4   | 5   |
| SYTO-82 LAMP dye         | 100 $\mu$ M | 0.5 $\mu$ M (1 $\mu$ M for TSV) | 0.1 | 0.2 |
| 5' FAM-polyT(5) reporter | 100 $\mu$ M | 2 $\mu$ M                       | 0.4 | 0.4 |
| Total                    |             |                                 | 20  | 20  |

d) Composition of 10X primer mix.

| 10x Primer Mix component (100 $\mu$ M) | 10x concentration | Reaction Concentration | Volume ( $\mu$ L) |
|----------------------------------------|-------------------|------------------------|-------------------|
| F3                                     | 2 $\mu$ M         | 0.2 $\mu$ M            | 2                 |
| B3                                     | 2 $\mu$ M         | 0.2 $\mu$ M            | 2                 |
| BIP                                    | 16 $\mu$ M        | 1.6 $\mu$ M            | 16                |
| FIP                                    | 16 $\mu$ M        | 1.6 $\mu$ M            | 16                |
| LF                                     | 4 $\mu$ M         | 0.4 $\mu$ M            | 4                 |
| LB                                     | 4 $\mu$ M         | 0.4 $\mu$ M            | 4                 |
| Water                                  |                   |                        | 56                |
| Total                                  |                   |                        | 100               |

e) Composition of sample dilutions used in SHERLOCK reactions.

| Sample dilution component                                     | WSSV      | TSV       |
|---------------------------------------------------------------|-----------|-----------|
| Sample DNA/RNA                                                | 1ng       | 10 ng     |
| Pathogen free shrimp nucleic acid (DNA for WSSV, RNA for TSV) | 20 ng     | 5 ng      |
| water                                                         | variable  | variable  |
| Total volume/one-pot reaction                                 | 4 $\mu$ L | 5 $\mu$ L |

**Table S3.** Viral concentrations estimated by qPCR, SHERLOCKv1, and SHERLOCKv2 assays ('NA', not detected).

| Target | Sample Name | qPCR predicted copies/ $\mu$ L (Mean) | qPCR predicted copies/ $\mu$ L (Std Dev) | SHERLOCKv1 predicted copies/ $\mu$ L (mean) | SHERLOCKv1 predicted copies/ $\mu$ L (Std Dev) | SHERLOCKv2 predicted copies/ $\mu$ L (Mean) | SHERLOCKv2 predicted copies/ $\mu$ L (Std Dev) |
|--------|-------------|---------------------------------------|------------------------------------------|---------------------------------------------|------------------------------------------------|---------------------------------------------|------------------------------------------------|
| TSV    | Val.1       | 9.449E+06                             | 2.946E+04                                | 0.000E+00                                   | 0.000E+00                                      | 3.667E+06                                   | 1.241E+06                                      |
| TSV    | Val.2       | 6.475E+02                             | 8.442E+01                                | 0.000E+00                                   | 0.000E+00                                      | NA                                          | NA                                             |
| TSV    | Val.4       | 2.040E+09                             | 4.584E+08                                | 0.000E+00                                   | 0.000E+00                                      | 1.715E+08                                   | 5.258E+07                                      |
| TSV    | Val.5       | 9.907E+06                             | 3.761E+05                                | 0.000E+00                                   | 0.000E+00                                      | 1.131E+06                                   | 1.548E+05                                      |
| TSV    | Val.6       | 2.943E+04                             | 1.010E+03                                | 0.000E+00                                   | 0.000E+00                                      | 4.000E+03                                   | 3.287E+03                                      |
| TSV    | Val.7       | 2.340E+03                             | 2.518E+02                                | 0.000E+00                                   | 0.000E+00                                      | 1.150E+02                                   | 7.981E+01                                      |
| TSV    | Val.8       | 9.453E+02                             | 1.844E+02                                | 0.000E+00                                   | 0.000E+00                                      | 4.200E+01                                   | 3.861E+01                                      |
| TSV    | Val.9       | 9.985E+03                             | 4.586E+02                                | 0.000E+00                                   | 0.000E+00                                      | 1.198E+01                                   | 1.288E+01                                      |

|      |          |           |           |           |           |           |           |
|------|----------|-----------|-----------|-----------|-----------|-----------|-----------|
| TSV  | Val.10   | 4.252E+03 | 2.525E+02 | 0.000E+00 | 0.000E+00 | 2.465E+02 | 1.626E+02 |
| TSV  | Val.12   | 2.001E+01 | 6.875E+00 | 0.000E+00 | 0.000E+00 | NA        | NA        |
| TSV  | Val.13   | 7.932E+05 | 2.680E+04 | 0.000E+00 | 0.000E+00 | 8.302E+04 | 8.499E+04 |
| TSV  | Val.14   | 4.780E+03 | 1.094E+03 | 0.000E+00 | 0.000E+00 | 8.364E-01 | 8.537E-01 |
| TSV  | Val.15   | 1.947E+04 | 6.245E+02 | 0.000E+00 | 0.000E+00 | 5.203E+02 | 6.394E+02 |
| TSV  | Val.16   | 2.503E+05 | 9.313E+03 | 0.000E+00 | 0.000E+00 | 2.252E+05 | 1.353E+05 |
| TSV  | Val.18   | 8.489E+03 | 1.669E+03 | 0.000E+00 | 0.000E+00 | 1.435E+03 | 8.932E+02 |
| TSV  | Val.19   | 1.298E+04 | 2.445E+02 | 0.000E+00 | 0.000E+00 | 1.404E+03 | 7.166E+02 |
| TSV  | Val.20   | 4.244E+03 | 1.343E+03 | 0.000E+00 | 0.000E+00 | 4.699E+02 | 2.488E+02 |
| TSV  | Val.21   | 9.617E+07 | 5.850E+06 | 0.000E+00 | 0.000E+00 | 1.667E+07 | 1.775E+07 |
| TSV  | Val.22   | 3.308E+04 | 1.023E+03 | 0.000E+00 | 0.000E+00 | 2.837E+02 | 3.080E+02 |
| TSV  | Val.23   | 5.702E+03 | 2.979E+02 | 0.000E+00 | 0.000E+00 | 5.226E+02 | 1.716E+02 |
| TSV  | Val.25   | 8.645E+02 | 9.886E+01 | 0.000E+00 | 0.000E+00 | NA        | NA        |
| TSV  | Val.26   | 5.215E+06 | 1.170E+05 | 0.000E+00 | 0.000E+00 | 1.168E+06 | 1.211E+06 |
| TSV  | Val.28   | 6.022E+03 | 1.445E+02 | 0.000E+00 | 0.000E+00 | 6.070E+00 | 4.024E+00 |
| TSV  | Val.29   | 8.226E+07 | 3.939E+06 | 0.000E+00 | 0.000E+00 | 8.163E+05 | 2.325E+05 |
| TSV  | Val.30   | 1.832E+04 | 8.273E+01 | 0.000E+00 | 0.000E+00 | 1.398E+02 | 8.417E+01 |
| TSV  | Val.31   | 5.549E+03 | 2.953E+02 | 0.000E+00 | 0.000E+00 | 2.279E+02 | 1.174E+02 |
| TSV  | Val.32   | 1.044E+02 | 5.121E+00 | 0.000E+00 | 0.000E+00 | 1.046E-03 | 9.807E-04 |
| TSV  | Val.33   | 5.150E+03 | 5.260E+02 | 0.000E+00 | 0.000E+00 | NA        | NA        |
| TSV  | Val.34   | 3.735E+03 | 3.124E+02 | 0.000E+00 | 0.000E+00 | 4.455E+02 | 2.415E+02 |
| TSV  | Val.35   | 3.080E+07 | 1.027E+06 | 0.000E+00 | 0.000E+00 | 6.240E+06 | 7.671E+06 |
| WSSV | Pvan_001 | 1.261E+06 | 4.825E+04 | 1.777E+06 | 6.257E+05 | 5.467E+06 | 1.360E+06 |
| WSSV | Pvan_002 | 1.718E+06 | 5.008E+04 | 1.669E+06 | 5.453E+05 | 4.610E+06 | 1.110E+06 |
| WSSV | Pvan_003 | 1.437E+07 | 4.244E+06 | 9.002E+06 | 7.179E+06 | 9.668E+07 | 6.755E+06 |
| WSSV | Pvan_004 | 8.136E+05 | 8.335E+04 | 3.494E+05 | 1.934E+05 | 1.781E+06 | 5.254E+05 |
| WSSV | Pvan_005 | 1.491E+07 | 9.171E+05 | 1.180E+07 | 6.902E+06 | 7.704E+07 | 9.320E+06 |
| WSSV | Pvan_006 | 2.455E+05 | 1.066E+04 | 3.294E+05 | 5.066E+04 | 1.162E+06 | 8.754E+04 |
| WSSV | Pvan_007 | 1.990E+06 | 6.025E+04 | 2.411E+06 | 6.014E+05 | 8.351E+06 | 3.014E+06 |
| WSSV | Pvan_008 | 8.500E+06 | 1.241E+06 | 8.461E+06 | 9.652E+06 | 4.689E+07 | 4.589E+06 |
| WSSV | Pvan_009 | 2.043E+07 | 2.886E+06 | 1.453E+07 | 5.325E+06 | 5.841E+07 | 1.437E+07 |
| WSSV | Pvan_010 | 3.483E+07 | 5.419E+06 | 3.315E+07 | 5.680E+07 | 1.292E+09 | 2.086E+08 |
| WSSV | Pvan_011 | 7.553E+02 | 1.339E+02 | 2.282E+03 | 4.922E+02 | 1.355E+03 | 1.869E+03 |
| WSSV | Pvan_012 | 8.253E+02 | 8.739E+01 | 1.709E+03 | 7.888E+02 | NA        | NA        |
| WSSV | Pvan_013 | 9.842E+02 | 5.217E+02 | 2.258E+03 | 8.400E+02 | 7.382E+02 | 5.447E+02 |
| WSSV | Pvan_014 | 3.520E+02 | 4.074E+02 | 5.704E+02 | 1.858E+02 | 1.695E+02 | 1.682E+02 |
| WSSV | Pvan_015 | 2.770E+06 | 6.137E+05 | 2.963E+06 | 1.853E+05 | 5.662E+04 | 3.025E+04 |
| WSSV | Pvan_016 | 3.145E+06 | 2.963E+05 | 3.008E+06 | 1.441E+06 | 2.550E+04 | 2.349E+04 |
| WSSV | Pvan_017 | 7.379E+06 | 4.678E+05 | 3.945E+06 | 3.114E+05 | 3.251E+05 | 3.747E+05 |
| WSSV | Pvan_018 | 5.524E+06 | 2.616E+05 | 1.211E+07 | 2.421E+07 | 5.117E+04 | 5.783E+04 |
| WSSV | Pvan_019 | 5.898E+07 | 1.231E+07 | 6.127E+07 | 1.210E+08 | 3.249E+07 | 9.313E+06 |

|      |          |           |           |           |           |           |           |
|------|----------|-----------|-----------|-----------|-----------|-----------|-----------|
| WSSV | Pvan_020 | 2.851E+05 | 1.344E+04 | 4.409E+01 | 1.516E+01 | 7.085E+03 | 2.078E+03 |
| WSSV | Pvan_021 | 2.651E+07 | 4.818E+05 | 1.278E+07 | 1.324E+07 | 6.260E+07 | 1.339E+07 |
| WSSV | Pvan_022 | 2.378E+06 | 2.214E+05 | 1.323E+07 | 2.645E+07 | 1.401E+05 | 8.987E+04 |
| WSSV | Pvan_023 | 5.685E+06 | 8.777E+05 | 1.094E+07 | 2.152E+07 | 8.905E+04 | 4.511E+04 |
| WSSV | Pvan_024 | 6.622E+05 | 1.041E+05 | 6.296E+05 | 1.090E+06 | 3.659E+02 | 4.427E+02 |
| WSSV | Pvan_025 | 7.149E+02 | 1.300E+02 | 9.502E+03 | 1.892E+04 | 5.317E+02 | 4.620E+02 |
| WSSV | Pvan_026 | 5.440E+01 | 2.210E+00 | 3.462E+01 | 1.709E+00 | NA        | NA        |
| WSSV | Pvan_027 | 4.713E+02 | 2.112E+01 | 8.036E+03 | 1.563E+04 | 4.571E+03 | 6.644E+03 |
| WSSV | Pvan_028 | 2.509E+07 | 7.114E+05 | 4.033E+07 | 6.985E+07 | 3.000E+07 | 1.250E+07 |
| WSSV | Pvan_029 | 3.811E+01 | 7.100E-01 | 3.440E+01 | 1.733E+00 | NA        | NA        |
| WSSV | Pvan_030 | 4.017E+02 | 1.276E+02 | 7.409E+02 | 1.216E+03 | 1.842E+03 | 3.875E+02 |
| WSSV | Pvan_031 | 5.157E+07 | 1.085E+07 | 5.494E+07 | 5.642E+07 | 6.302E+07 | 2.063E+07 |
| WSSV | Pvan_032 | 3.280E+05 | 3.823E+04 | 1.353E+05 | 1.617E+05 | 1.325E+05 | 4.616E+04 |
| WSSV | Pvan_033 | 4.521E+07 | 1.392E+07 | 2.271E+07 | 1.533E+07 | 1.521E+08 | 4.032E+07 |
| WSSV | Pvan_034 | 2.561E+06 | 4.552E+05 | 2.179E+06 | 3.746E+06 | 1.760E+04 | 1.003E+04 |
| WSSV | Pvan_035 | 6.993E+06 | 8.791E+05 | 5.778E+06 | 9.374E+06 | 1.386E+04 | 6.544E+03 |
